# Supplementary material for: Stereo-electronic factors influencing the stability of hydroperoxyalkyl radicals: transferability of chemical trends across hydrocarbons and ab initio methods
Source: Royal Society of Chemistry journal article supplement (doi:10.1039/d3cp03598k), 2023-01-01
Supplement: d3cp03598k1.pdf [file d3cp03598k1.pdf]

*Supplementary information for:*

**Stereo-Electronic Factors Influencing the  
Stability of Hydroperoxyalkyl Radicals:  
Transferability of Chemical Trends across  
Hydrocarbons and *ab initio* Methods**

Saurabh Chandra Kandpal,<sup>†</sup> Kgalaletso P. Otukile,<sup>‡</sup> Shweta Jindal,<sup>†</sup> Salini  
Senthil,<sup>†</sup> Cameron Matthews,<sup>‡</sup> Sabyasachi Chakraborty,<sup>†</sup> Lyudmila V.  
Moskaleva,<sup>\*,‡</sup> and Raghunathan Ramakrishnan<sup>\*,†</sup>

<sup>†</sup>*Tata Institute of Fundamental Research, Hyderabad 500046, India*

<sup>‡</sup>*Department of Chemistry, University of the Free State, PO Box 339, Bloemfontein 9300,  
South Africa*

E-mail: moskaleval@ufs.ac.za; ramakrishnan@tifrh.res.in

## Table of Contents

1. DFT benchmarking (p. 10-11)
2. Spin contamination analysis (p. 12-14)
3. Low-temperature hydrocarbon combustion mechanism and the associated reactive intermediates for  $R\cdot$ , where R is
  - **Figure S1** ethyl (p. 15)
  - **Figure S2** isopropyl (p. 15)
  - **Figure S3** isobutyl (p. 15)
  - **Figure S4** tertbutyl(p. 16)
  - **Figure S5** neopentyl (p. 16)
  - **Figure S6** cyclohexyl (p. 16)
  - **Figure S7**  $\alpha$ -cyclohexenyl (p. 17)
  - **Figure S8**  $\beta$ -cyclohexenyl (p. 17)
  - **Figure S9** cyclohexadienyl (p. 17)
4. Intrinsic Reaction Coordinate (IRC) Profiles for the different reactions in low-temperature combustion for  $R\cdot$ , where R is
  - **Figure S10** ethyl (p. 18)
  - **Figure S11** isopropyl (p. 19)
  - **Figure S12** isobutyl (p. 19)
  - **Figure S13** tertbutyl (p. 20)
  - **Figure S14** neopentyl (p. 20)
  - **Figure S15** cyclohexyl (p. 21)
  - **Figure S16**  $\alpha$ -cyclohexenyl (p. 21)
  - **Figure S17**  $\beta$ -cyclohexenyl (p. 22)
  - **Figure S18** cyclohexadienyl (p. 22)
5. W1-level<sup>1</sup> equilibrium geometry, harmonic frequencies, and thermochemistry energies of different reaction species involved in combustion reaction of  $R\cdot$ , where R is
  - **Hydrocarbon 1:** ethyl (pp. 23–31)
    - **Species 1:**  $\cdot R$  (p. 23)
    - **Species 2:**  $ROO\cdot$  (p. 24)
    - **Species 3:**  $\cdot QOOH$  (p. 25)
    - **Species 4:** *cy*-ether (p. 26)
    - **Species 5:** alkene (p. 27)

- **Species 6:** Transition state along  $\text{ROO}\cdot \xrightarrow{\text{TS1}} \cdot\text{QOOH}$  (p. 28)
- **Species 7:** Transition state along  $\text{ROO}\cdot \xrightarrow{\text{TS2}} \text{alkene} + \cdot\text{OOH}$  (p. 29)
- **Species 8:** Transition state along  $\cdot\text{QOOH} \xrightarrow{\text{TS3}} \text{alkene} + \cdot\text{OOH}$  (p. 30)
- **Species 9:** Transition state along  $\cdot\text{QOOH} \xrightarrow{\text{TS4}} \text{cycloether} + \cdot\text{OH}$  (p. 31)
- **Hydrocarbon 2:** isopropyl (pp. 32–40)
  - **Species 1:**  $\cdot\text{R}$  (p. 32)
  - **Species 2:**  $\text{ROO}\cdot$  (p. 33)
  - **Species 3:**  $\cdot\text{QOOH}$  (p. 34)
  - **Species 4:** *cy-ether* (p. 35)
  - **Species 5:** alkene (p. 36)
  - **Species 6:** Transition state along  $\text{ROO}\cdot \xrightarrow{\text{TS1}} \cdot\text{QOOH}$  (p. 37)
  - **Species 7:** Transition state along  $\text{ROO}\cdot \xrightarrow{\text{TS2}} \text{alkene} + \cdot\text{OOH}$  (p. 38)
  - **Species 8:** Transition state along  $\cdot\text{QOOH} \xrightarrow{\text{TS3}} \text{alkene} + \cdot\text{OOH}$  (p. 39)
  - **Species 9:** Transition state along  $\cdot\text{QOOH} \xrightarrow{\text{TS4}} \text{cycloether} + \cdot\text{OH}$  (p. 40)
- **Hydrocarbon 3:** isobutyl (pp. 41–49)
  - **Species 1:**  $\cdot\text{R}$  (p. 41)
  - **Species 2:**  $\text{ROO}\cdot$  (p. 42)
  - **Species 3:**  $\cdot\text{QOOH}$  (p. 43)
  - **Species 4:** *cy-ether* (p. 44)
  - **Species 5:** alkene (p. 45)
  - **Species 6:** Transition state along  $\text{ROO}\cdot \xrightarrow{\text{TS1}} \cdot\text{QOOH}$  (p. 46)
  - **Species 7:** Transition state along  $\text{ROO}\cdot \xrightarrow{\text{TS2}} \text{alkene} + \cdot\text{OOH}$  (p. 47)
  - **Species 8:** Transition state along  $\cdot\text{QOOH} \xrightarrow{\text{TS3}} \text{alkene} + \cdot\text{OOH}$  (p. 48)
  - **Species 9:** Transition state along  $\cdot\text{QOOH} \xrightarrow{\text{TS4}} \text{cycloether} + \cdot\text{OH}$  (p. 49)
- **Hydrocarbon 4:** tertbutyl (pp. 50–58)
  - **Species 1:**  $\cdot\text{R}$  (p. 50)
  - **Species 2:**  $\text{ROO}\cdot$  (p. 51)
  - **Species 3:**  $\cdot\text{QOOH}$  (p. 52)
  - **Species 4:** *cy-ether* (p. 53)
  - **Species 5:** alkene (p. 54)
  - **Species 6:** Transition state along  $\text{ROO}\cdot \xrightarrow{\text{TS1}} \cdot\text{QOOH}$  (p. 55)
  - **Species 7:** Transition state along  $\text{ROO}\cdot \xrightarrow{\text{TS2}} \text{alkene} + \cdot\text{OOH}$  (p. 56)
  - **Species 8:** Transition state along  $\cdot\text{QOOH} \xrightarrow{\text{TS3}} \text{alkene} + \cdot\text{OOH}$  (p. 57)
  - **Species 9:** Transition state along  $\cdot\text{QOOH} \xrightarrow{\text{TS4}} \text{cycloether} + \cdot\text{OH}$  (p. 58)
- **Hydrocarbon 5:** neopentyl (pp. 59–67)

- **Species 1:**  $\cdot\text{R}$  (p. 59)
- **Species 2:**  $\text{ROO}\cdot$  (p. 60)
- **Species 3:**  $\cdot\text{QOOH}$  (p. 61)
- **Species 4:** *cy*-ether (p. 61)
- **Species 5:** dimethylcyclopropane (p. 63)
- **Species 6:** Transition state along  $\text{ROO}\cdot \xrightarrow{\text{TS1}} \cdot\text{QOOH}$  (p. 64)
- **Species 7:** Transition state along  $\text{ROO}\cdot \xrightarrow{\text{TS2}} \text{alkene} + \cdot\text{OOH}$  (p. 65)
- **Species 8:** Transition state along  $\cdot\text{QOOH} \xrightarrow{\text{TS3}} \text{alkene} + \cdot\text{OOH}$  (p. 66)
- **Species 9:** Transition state along  $\cdot\text{QOOH} \xrightarrow{\text{TS4}} \text{cycloether} + \cdot\text{OH}$  (p. 67)
- **Hydrocarbon 6:** cyclohexyl (pp. 68–76)
  - **Species 1:**  $\cdot\text{R}$  (p. 68)
  - **Species 2:**  $\text{ROO}\cdot$  (p. 69)
  - **Species 3:**  $\cdot\text{QOOH}$  (p. 70)
  - **Species 4:** *cy*-ether (p. 71)
  - **Species 5:** alkene (p. 72)
  - **Species 6:** Transition state along  $\text{ROO}\cdot \xrightarrow{\text{TS1}} \cdot\text{QOOH}$  (p. 73)
  - **Species 7:** Transition state along  $\text{ROO}\cdot \xrightarrow{\text{TS2}} \text{alkene} + \cdot\text{OOH}$  (p. 74)
  - **Species 8:** Transition state along  $\cdot\text{QOOH} \xrightarrow{\text{TS3}} \text{alkene} + \cdot\text{OOH}$  (p. 75)
  - **Species 9:** Transition state along  $\cdot\text{QOOH} \xrightarrow{\text{TS4}} \text{cycloether} + \cdot\text{OH}$  (p. 76)
- **Hydrocarbon 7:**  $\alpha$ -cyclohexenyl (pp. 77–85)
  - **Species 1:**  $\cdot\text{R}$  (p. 77)
  - **Species 2:**  $\text{ROO}\cdot$  (p. 78)
  - **Species 3:**  $\cdot\text{QOOH}$  (p. 79)
  - **Species 4:** *cy*-ether (p. 80)
  - **Species 5:** alkene (p. 81)
  - **Species 6:** Transition state along  $\text{ROO}\cdot \xrightarrow{\text{TS1}} \cdot\text{QOOH}$  (p. 82)
  - **Species 7:** Transition state along  $\text{ROO}\cdot \xrightarrow{\text{TS2}} \text{alkene} + \cdot\text{OOH}$  (p. 83)
  - **Species 8:** Transition state along  $\cdot\text{QOOH} \xrightarrow{\text{TS3}} \text{alkene} + \cdot\text{OOH}$  (p. 84)
  - **Species 9:** Transition state along  $\cdot\text{QOOH} \xrightarrow{\text{TS4}} \text{cycloether} + \cdot\text{OH}$  (p. 85)
- **Hydrocarbon 8:** cyclohexadienyl (pp. 86–94)
  - **Species 1:**  $\cdot\text{R}$  (p. 86)
  - **Species 2:**  $\text{ROO}\cdot$  (p. 87)
  - **Species 3:**  $\cdot\text{QOOH}$  (p. 88)
  - **Species 4:** *cy*-ether (p. 89)
  - **Species 5:** alkene (p. 90)
  - **Species 6:** Transition state along  $\text{ROO}\cdot \xrightarrow{\text{TS1}} \cdot\text{QOOH}$  (p. 91)

- **Species 7:** Transition state along  $\text{ROO}\cdot \xrightarrow{\text{TS2}} \text{alkene} + \cdot\text{OOH}$  (p. 92)
- **Species 8:** Transition state along  $\cdot\text{QOOH} \xrightarrow{\text{TS3}} \text{alkene} + \cdot\text{OOH}$  (p. 93)
- **Species 9:** Transition state along  $\cdot\text{QOOH} \xrightarrow{\text{TS4}} \text{cycloether} + \cdot\text{OH}$  (p. 94)

6. G4-level<sup>2</sup> equilibrium geometry, harmonic frequencies, and thermochemistry energies of different reaction species involved in combustion reaction of R·, where R is

- **Hydrocarbon 1:** ethyl (pp. 95–103)
  - **Species 1:** ·R (p. 95)
  - **Species 2:** ROO· (p. 96)
  - **Species 3:** ·QOOH (p. 97)
  - **Species 4:** *cy*-ether (p. 98)
  - **Species 5:** alkene (p. 99)
  - **Species 6:** Transition state along  $\text{ROO}\cdot \xrightarrow{\text{TS1}} \cdot\text{QOOH}$  (p. 100)
  - **Species 7:** Transition state along  $\text{ROO}\cdot \xrightarrow{\text{TS2}} \text{alkene} + \cdot\text{OOH}$  (p. 101)
  - **Species 8:** Transition state along  $\cdot\text{QOOH} \xrightarrow{\text{TS3}} \text{alkene} + \cdot\text{OOH}$  (p. 102)
  - **Species 9:** Transition state along  $\cdot\text{QOOH} \xrightarrow{\text{TS4}} \text{cycloether} + \cdot\text{OH}$  (p. 103)
- **Hydrocarbon 2:** isopropyl (pp. 104–112)
  - **Species 1:** ·R (p. 104)
  - **Species 2:** ROO· (p. 105)
  - **Species 3:** ·QOOH (p. 106)
  - **Species 4:** *cy*-ether (p. 107)
  - **Species 5:** alkene (p. 108)
  - **Species 6:** Transition state along  $\text{ROO}\cdot \xrightarrow{\text{TS1}} \cdot\text{QOOH}$  (p. 109)
  - **Species 7:** Transition state along  $\text{ROO}\cdot \xrightarrow{\text{TS2}} \text{alkene} + \cdot\text{OOH}$  (p. 110)
  - **Species 8:** Transition state along  $\cdot\text{QOOH} \xrightarrow{\text{TS3}} \text{alkene} + \cdot\text{OOH}$  (p. 111)
  - **Species 9:** Transition state along  $\cdot\text{QOOH} \xrightarrow{\text{TS4}} \text{cycloether} + \cdot\text{OH}$  (p. 112)
- **Hydrocarbon 3:** isobutyl (pp. 113–121)
  - **Species 1:** ·R (p. 113)
  - **Species 2:** ROO· (p. 114)
  - **Species 3:** ·QOOH (p. 115)
  - **Species 4:** *cy*-ether (p. 116)
  - **Species 5:** alkene (p. 117)
  - **Species 6:** Transition state along  $\text{ROO}\cdot \xrightarrow{\text{TS1}} \cdot\text{QOOH}$  (p. 118)
  - **Species 7:** Transition state along  $\text{ROO}\cdot \xrightarrow{\text{TS2}} \text{alkene} + \cdot\text{OOH}$  (p. 119)
  - **Species 8:** Transition state along  $\cdot\text{QOOH} \xrightarrow{\text{TS3}} \text{alkene} + \cdot\text{OOH}$  (p. 120)
  - **Species 9:** Transition state along  $\cdot\text{QOOH} \xrightarrow{\text{TS4}} \text{cycloether} + \cdot\text{OH}$  (p. 121)

- **Hydrocarbon 4:** tertbutyl (pp. 122–130)
  - **Species 1:**  $\cdot R$  (p. 122)
  - **Species 2:**  $ROO\cdot$  (p. 123)
  - **Species 3:**  $\cdot QOOH$  (p. 124)
  - **Species 4:** *cy*-ether (p. 125)
  - **Species 5:** alkene (p. 126)
  - **Species 6:** Transition state along  $ROO\cdot \xrightarrow{TS1} \cdot QOOH$  (p. 127)
  - **Species 7:** Transition state along  $ROO\cdot \xrightarrow{TS2} \text{alkene} + \cdot OOH$  (p. 128)
  - **Species 8:** Transition state along  $\cdot QOOH \xrightarrow{TS3} \text{alkene} + \cdot OOH$  (p. 129)
  - **Species 9:** Transition state along  $\cdot QOOH \xrightarrow{TS4} \text{cycloether} + \cdot OH$  (p. 130)
- **Hydrocarbon 5:** neopentyl (pp. 131–139)
  - **Species 1:**  $\cdot R$  (p. 131)
  - **Species 2:**  $ROO\cdot$  (p. 132)
  - **Species 3:**  $\cdot QOOH$  (p. 133)
  - **Species 4:** *cy*-ether (p. 134)
  - **Species 5:** alkene (p. 135)
  - **Species 6:** Transition state along  $ROO\cdot \xrightarrow{TS1} \cdot QOOH$  (p. 136)
  - **Species 7:** Transition state along  $ROO\cdot \xrightarrow{TS2} \text{alkene} + \cdot OOH$  (p. 137)
  - **Species 8:** Transition state along  $\cdot QOOH \xrightarrow{TS3} \text{alkene} + \cdot OOH$  (p. 138)
  - **Species 9:** Transition state along  $\cdot QOOH \xrightarrow{TS4} \text{cycloether} + \cdot OH$  (p. 139)
- **Hydrocarbon 6:** cyclohexyl (pp. 140–148)
  - **Species 1:**  $\cdot R$  (p. 140)
  - **Species 2:**  $ROO\cdot$  (p. 141)
  - **Species 3:**  $\cdot QOOH$  (p. 142)
  - **Species 4:** *cy*-ether (p. 143)
  - **Species 5:** alkene (p. 144)
  - **Species 6:** Transition state along  $ROO\cdot \xrightarrow{TS1} \cdot QOOH$  (p. 145)
  - **Species 7:** Transition state along  $ROO\cdot \xrightarrow{TS2} \text{alkene} + \cdot OOH$  (p. 146)
  - **Species 8:** Transition state along  $\cdot QOOH \xrightarrow{TS3} \text{alkene} + \cdot OOH$  (p. 147)
  - **Species 9:** Transition state along  $\cdot QOOH \xrightarrow{TS4} \text{cycloether} + \cdot OH$  (p. 148)
- **Hydrocarbon 7:**  $\alpha$ -cyclohexenyl (pp. 149–157)
  - **Species 1:**  $\cdot R$  (p. 149)
  - **Species 2:**  $ROO\cdot$  (p. 150)
  - **Species 3:**  $\cdot QOOH$  (p. 151)
  - **Species 4:** *cy*-ether (p. 152)
  - **Species 5:** alkene (p. 153)

- **Species 6:** Transition state along  $\text{ROO}\cdot \xrightarrow{\text{TS1}} \cdot\text{QOOH}$  (p. 154)
- **Species 7:** Transition state along  $\text{ROO}\cdot \xrightarrow{\text{TS2}} \text{alkene} + \cdot\text{OOH}$  (p. 155)
- **Species 8:** Transition state along  $\cdot\text{QOOH} \xrightarrow{\text{TS3}} \text{alkene} + \cdot\text{OOH}$  (p. 156)
- **Species 9:** Transition state along  $\cdot\text{QOOH} \xrightarrow{\text{TS4}} \text{cycloether} + \cdot\text{OH}$  (p. 157)
- **Hydrocarbon 8:**  $\beta$ -cyclohexenyl (pp. 158–166)
  - **Species 1:**  $\cdot\text{R}$  (p. 158)
  - **Species 2:**  $\text{ROO}\cdot$  (p. 159)
  - **Species 3:**  $\cdot\text{QOOH}$  (p. 160)
  - **Species 4:** *cy*-ether (p. 161)
  - **Species 5:** alkene (p. 162)
  - **Species 6:** Transition state along  $\text{ROO}\cdot \xrightarrow{\text{TS1}} \cdot\text{QOOH}$  (p. 163)
  - **Species 7:** Transition state along  $\text{ROO}\cdot \xrightarrow{\text{TS2}} \text{alkene} + \cdot\text{OOH}$  (p. 164)
  - **Species 8:** Transition state along  $\cdot\text{QOOH} \xrightarrow{\text{TS3}} \text{alkene} + \cdot\text{OOH}$  (p. 165)
  - **Species 9:** Transition state along  $\cdot\text{QOOH} \xrightarrow{\text{TS4}} \text{cycloether} + \cdot\text{OH}$  (p. 166)
- **Hydrocarbon 9:** cyclohexadienyl (pp. 167–175)
  - **Species 1:**  $\cdot\text{R}$  (p. 167)
  - **Species 2:**  $\text{ROO}\cdot$  (p. 168)
  - **Species 3:**  $\cdot\text{QOOH}$  (p. 169)
  - **Species 4:** *cy*-ether (p. 170)
  - **Species 5:** benzene (p. 171)
  - **Species 6:** Transition state along  $\text{ROO}\cdot \xrightarrow{\text{TS1}} \cdot\text{QOOH}$  (p. 172)
  - **Species 7:** Transition state along  $\text{ROO}\cdot \xrightarrow{\text{TS2}} \text{alkene} + \cdot\text{OOH}$  (p. 173)
  - **Species 8:** Transition state along  $\cdot\text{QOOH} \xrightarrow{\text{TS3}} \text{alkene} + \cdot\text{OOH}$  (p. 174)
  - **Species 9:** Transition state along  $\cdot\text{QOOH} \xrightarrow{\text{TS4}} \text{cycloether} + \cdot\text{OH}$  (p. 175)
- **Hydrocarbon 10:** 2-(cyclohexa-2,4-dien-1-yl)ethyl (pp. 176–183)
  - **Species 1:**  $\cdot\text{R}$  (p. 176)
  - **Species 2:**  $\text{ROO}\cdot$  (p. 177)
  - **Species 3:** *syn*- $\cdot\text{QOOH}$  (p. 178)
  - **Species 4:** *anti*- $\cdot\text{QOOH}$  (p. 179)
  - **Species 5:** *cy*-ether (p. 180)
  - **Species 6:** Transition state along  $\text{ROO}\cdot \xrightarrow{\text{TS1}} \cdot\text{QOOH}$  (p. 181)
  - **Species 7:** Transition state along  $\cdot\text{QOOH} \xrightarrow{\text{TS4}} \text{cycloether} + \cdot\text{OH}$  (p. 182-183)
- **Hydrocarbon 11:** 6-methyl cyclohepta-2,4-dien-1-yl (pp. 184–190)
  - **Species 1:**  $\cdot\text{R}$  (p. 184)
  - **Species 2:**  $\text{ROO}\cdot$  (p. 185)

- **Species 3:** *syn*-·QOOH (p. 186)
- **Species 4:** *anti*-·QOOH (p. 187)
- **Species 5:** *cy*-ether (p. 188)
- **Species 6:** Transition state along  $\text{ROO}\cdot \xrightarrow{\text{TS1}} \cdot\text{QOOH}$  (p. 189)
- **Species 7:** Transition state along  $\cdot\text{QOOH} \xrightarrow{\text{TS4}} \text{cycloether} + \cdot\text{OH}$  (p. 190)
- **Hydrocarbon 12:** (cyclohepta-3,5-dien-1-yl)methyl (pp. 191–198)
  - **Species 1:** ·R (p. 191)
  - **Species 2:** ROO· (p. 192)
  - **Species 3:** *syn*-·QOOH (p. 193)
  - **Species 4:** *anti*-·QOOH (p. 194)
  - **Species 5:** *cy*-ether (p. 195)
  - **Species 6:** Transition state along  $\text{ROO}\cdot \xrightarrow{\text{TS1}} \cdot\text{QOOH}$  (p. 196)
  - **Species 7:** Transition state along  $\cdot\text{QOOH} \xrightarrow{\text{TS4}} \text{cycloether} + \cdot\text{OH}$  (p. 197-198)
- **Hydrocarbon 13:** cyclohepta-2,4-dien-1-yl (pp. 199–205)
  - **Species 1:** ·R (p. 199)
  - **Species 2:** ROO· (p. 200)
  - **Species 3:** *syn*-·QOOH (p. 201)
  - **Species 4:** *anti*-·QOOH (p. 202)
  - **Species 5:** *cy*-ether (p. 203)
  - **Species 6:** Transition state along  $\text{ROO}\cdot \xrightarrow{\text{TS1}} \cdot\text{QOOH}$  (p. 204)
  - **Species 7:** Transition state along  $\cdot\text{QOOH} \xrightarrow{\text{TS4}} \text{cycloether} + \cdot\text{OH}$  (p. 205)
- **Hydrocarbon 14:** cyclohepta-3,5-dien-1-yl (pp. 206–209)
  - **Species 1:** ·R (p. 206)
  - **Species 2:** ROO· (p. 207)
  - **Species 3:** ·QOOH (p. 208)
  - **Species 4:** Transition state along  $\text{ROO}\cdot \xrightarrow{\text{TS1}} \cdot\text{QOOH}$  (p. 209)
- **Hydrocarbon 15:** (cyclohexa-2,4-dien-1-yl)methyl (5-membered path) (pp. 210–213)
  - **Species 1:** ·R (p. 210)
  - **Species 2:** ROO· (p. 211)
  - **Species 3:** ·QOOH (p. 212)
  - **Species 4:** Transition state along  $\text{ROO}\cdot \xrightarrow{\text{TS1}} \cdot\text{QOOH}$  (p. 213)
- **Hydrocarbon 16:** (cyclohexa-2,4-dien-1-yl)methyl (6-membered path) (pp. 214–217)
  - **Species 1:** ·R (p. 214)
  - **Species 2:** ROO· (p. 215)



- **Species 3:**  $\cdot\text{QOOH}$  (p. 216)
- **Species 4:** Transition state along  $\text{ROO}\cdot \xrightarrow{\text{TS1}} \cdot\text{QOOH}$  (p. 217)

7. References (pp. 218)

# DFT Benchmarking

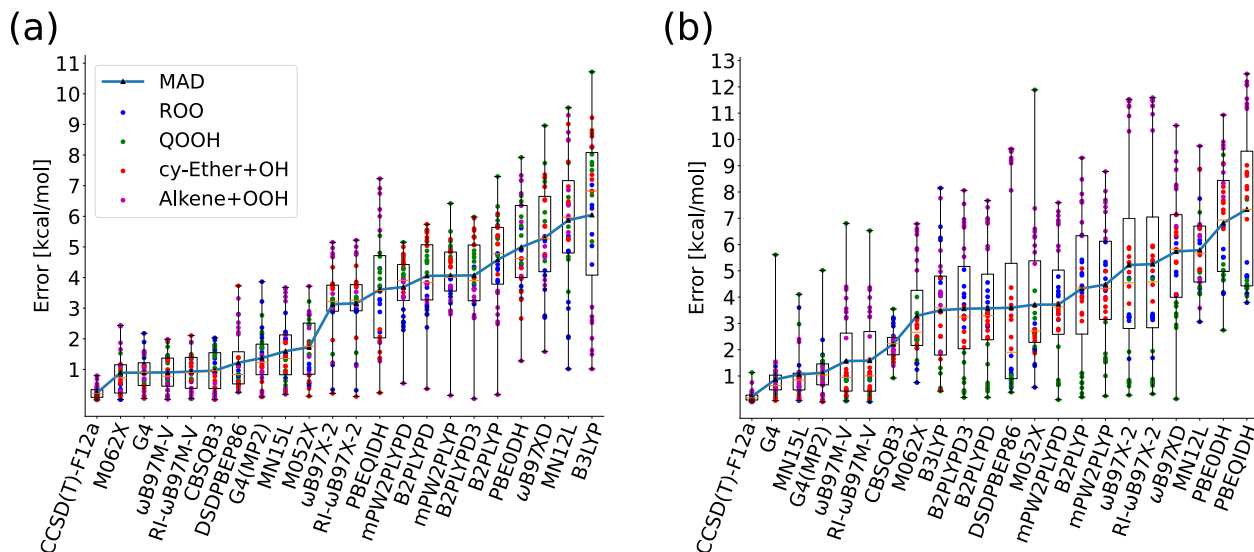

Figure S1: Ranking of the prediction accuracy of DFAs and cWFTs for reaction barriers using box-and-whisker plot. For a given method, the Box-and-whisker plot depicts the deviation in energy with respect to W1 energy of (a) Reaction species and (b) Reaction barriers for all the benchmark systems. For boxplots, the centre line denotes the median, the box displays the interquartile range, and the whiskers indicate the range. The MAD for each method is connected by blue line. Methods are sorted in ascending order of MAD. RI- $\omega$ B97M-V and RI- $\omega$ B97X-2 represent the methods where RI approximation was activated.

Table S1:  $\Delta U^{\text{ROO}}$  and  $\Delta U^{\text{TS4}}$  energies (with respect to  $\text{R}\cdot + \text{O}_2$ ) for dataset systems calculated with W1, CCSD(T)-F12a/cc-pVDZ-F12, G4, and RI- $\omega$ B97M-V methods. In the table, CC and DFT represent CCSD(T)-F12a/cc-pVDZ-F12 and RI- $\omega$ B97M-V, respectively.

| Species               | $\Delta U_{\text{W1}}^{\text{ROO}}$ | $\Delta U_{\text{CC}}^{\text{ROO}}$ | $\Delta U_{\text{G4}}^{\text{ROO}}$ | $\Delta U_{\text{DFT}}^{\text{ROO}}$ | $\Delta U_{\text{W1}}^{\text{TS4}}$ | $\Delta U_{\text{CC}}^{\text{TS4}}$ | $\Delta U_{\text{G4}}^{\text{TS4}}$ | $\Delta U_{\text{DFT}}^{\text{TS4}}$ |
|-----------------------|-------------------------------------|-------------------------------------|-------------------------------------|--------------------------------------|-------------------------------------|-------------------------------------|-------------------------------------|--------------------------------------|
| Ethyl                 | -32.82                              | -33.03                              | -33.45                              | -34.23                               | -1.52                               | -1.70                               | -0.30                               | 2.08                                 |
| Isopropyl             | -34.58                              | -34.75                              | -35.74                              | -35.55                               | -4.94                               | -5.06                               | -3.97                               | -0.46                                |
| Isobutyl              | -33.66                              | -33.70                              | -34.53                              | -35.01                               | -11.99                              | -11.90                              | -10.44                              | -9.48                                |
| Tertbutyl             | -36.65                              | -35.94                              | -37.20                              | -36.24                               | -6.74                               | -7.18                               | -6.25                               | -2.37                                |
| Neopentyl             | -33.73                              | -33.74                              | -34.67                              | -35.13                               | 0.71                                | 0.47                                | 2.20                                | 3.96                                 |
| <i>cy</i> -hexyl      | -33.45                              | -35.58                              | -36.83                              | -36.36                               | -8.55                               | -8.71                               | -7.54                               | -5.10                                |
| <i>cy</i> -hexenyl    | -19.63                              | -19.84                              | -21.52                              | -20.29                               | 7.29                                | 7.07                                | 7.91                                | 11.28                                |
| <i>cy</i> -hexadienyl | -11.13                              | -11.50                              | -13.31                              | -11.21                               | 3.67                                | 2.92                                | 4.89                                | 6.92                                 |

Table S2: Comparison of performance of CCSD(T)-F12a/cc-pVDZ-F12, G4 and RI- $\omega$ B97M-V with respect to W1 for ROO $\cdot$  and TS4. Here,  $\Delta\Delta U_1^{\text{ROO}} = \Delta U_{\text{ROO}}^{\text{W1}} - \Delta U_{\text{ROO}}^{\text{CC}}$ ,  $\Delta\Delta U_2^{\text{ROO}} = \Delta U_{\text{ROO}}^{\text{W1}} - \Delta U_{\text{ROO}}^{\text{G4}}$ ,  $\Delta\Delta U_3^{\text{ROO}} = \Delta U_{\text{ROO}}^{\text{W1}} - \Delta U_{\text{ROO}}^{\text{RI}}$ ,  $\Delta\Delta U_1^{\text{TS4}} = \Delta U_{\text{TS4}}^{\text{W1}} - \Delta U_{\text{TS4}}^{\text{CC}}$ ,  $\Delta\Delta U_2^{\text{TS4}} = \Delta U_{\text{TS4}}^{\text{W1}} - \Delta U_{\text{TS4}}^{\text{G4}}$ , and  $\Delta\Delta U_3^{\text{TS4}} = \Delta U_{\text{TS4}}^{\text{W1}} - \Delta U_{\text{TS4}}^{\text{RI}}$ .

| Species               | $\Delta\Delta U_1^{\text{ROO}}$ | $\Delta\Delta U_2^{\text{ROO}}$ | $\Delta\Delta U_3^{\text{ROO}}$ | $\Delta\Delta U_1^{\text{TS4}}$ | $\Delta\Delta U_2^{\text{TS4}}$ | $\Delta\Delta U_3^{\text{TS4}}$ |
|-----------------------|---------------------------------|---------------------------------|---------------------------------|---------------------------------|---------------------------------|---------------------------------|
| Ethyl                 | 0.21                            | 0.63                            | 1.41                            | 0.18                            | -1.18                           | -3.60                           |
| Isopropyl             | 0.17                            | 1.16                            | 0.97                            | 0.32                            | -0.77                           | -4.28                           |
| Isobutyl              | 0.04                            | 0.87                            | 1.35                            | -0.09                           | -1.55                           | -2.51                           |
| Tertbutyl             | 0.29                            | 1.55                            | 0.59                            | 0.44                            | -0.49                           | -4.27                           |
| Neopentyl             | 0.01                            | 0.94                            | 1.40                            | 0.24                            | -1.49                           | -3.25                           |
| <i>cy</i> -hexyl      | 0.13                            | 1.38                            | 0.91                            | 0.16                            | -1.01                           | -3.45                           |
| <i>cy</i> -hexenyl    | 0.21                            | 1.89                            | 0.66                            | 0.22                            | -0.62                           | -3.99                           |
| <i>cy</i> -hexadienyl | 0.37                            | 2.18                            | 0.08                            | 0.75                            | -1.22                           | -3.25                           |

## Spin contamination

Based on the results presented in Table. IV in the main text, it is evident that the MAD is highest for TS4 for all the density functional theory (DFT) functionals considered, except for MN15L. This significant deviation for TS4 is the primary contributor to the considerably high MAD values observed for energy barriers for all the functionals. To understand the cause of this high deviation for TS4, the  $\langle S^2 \rangle$  values for all reaction species and functionals were examined. The ideal value of  $\langle S^2 \rangle$  for a singlet radical is 0.75. When  $\langle S^2 \rangle$  deviates from this value, it is known as spin-contamination or spin error. The higher the deviation, the higher the spin contamination. The results in FigureS3 demonstrate that the spin mean absolute error (MAE) for TS4 is higher than that for the other reaction species. The Pearson’s correlation coefficient between spin MAE and energy MAE is 0.81 for TS4, indicating that the higher energy MAE of TS4 is due to its higher spin MAE. Furthermore, the  $\langle S^2 \rangle$  values for TS4 exhibit a more significant deviation from the ideal value compared to the other TS. While TS1, TS2, and TS3 have all their data points between 0.75 and 1.0, TS4 has  $\langle S^2 \rangle$  values higher than 1.0 for many functionals, which indicates higher spin contamination for TS4. The higher the spin contamination for TS4, the higher the MAD for all the functionals. Hence, this high spin contamination for TS4 may be one of the main reasons for the very high MAD values.

When different functionals were compared, MN15L was found to be the best-performing functional for TS, showing very low spin contamination for all the TS. In this study, all the Minnesota functionals (M06-2X, M05-2X, MN15L, MN12L) exhibited very low spin contamination compared to other functionals. Additionally,  $\omega$ B97M-V also had low spin contamination and low MAD for TS4. However, DSDPBEP86,  $\omega$ B97X-2, and PBEQIDH exhibited high spin contamination for TS4 and very high MAD values of 9.25 kcal/mol, 11.21, and 11.77 kcal/mol, respectively.

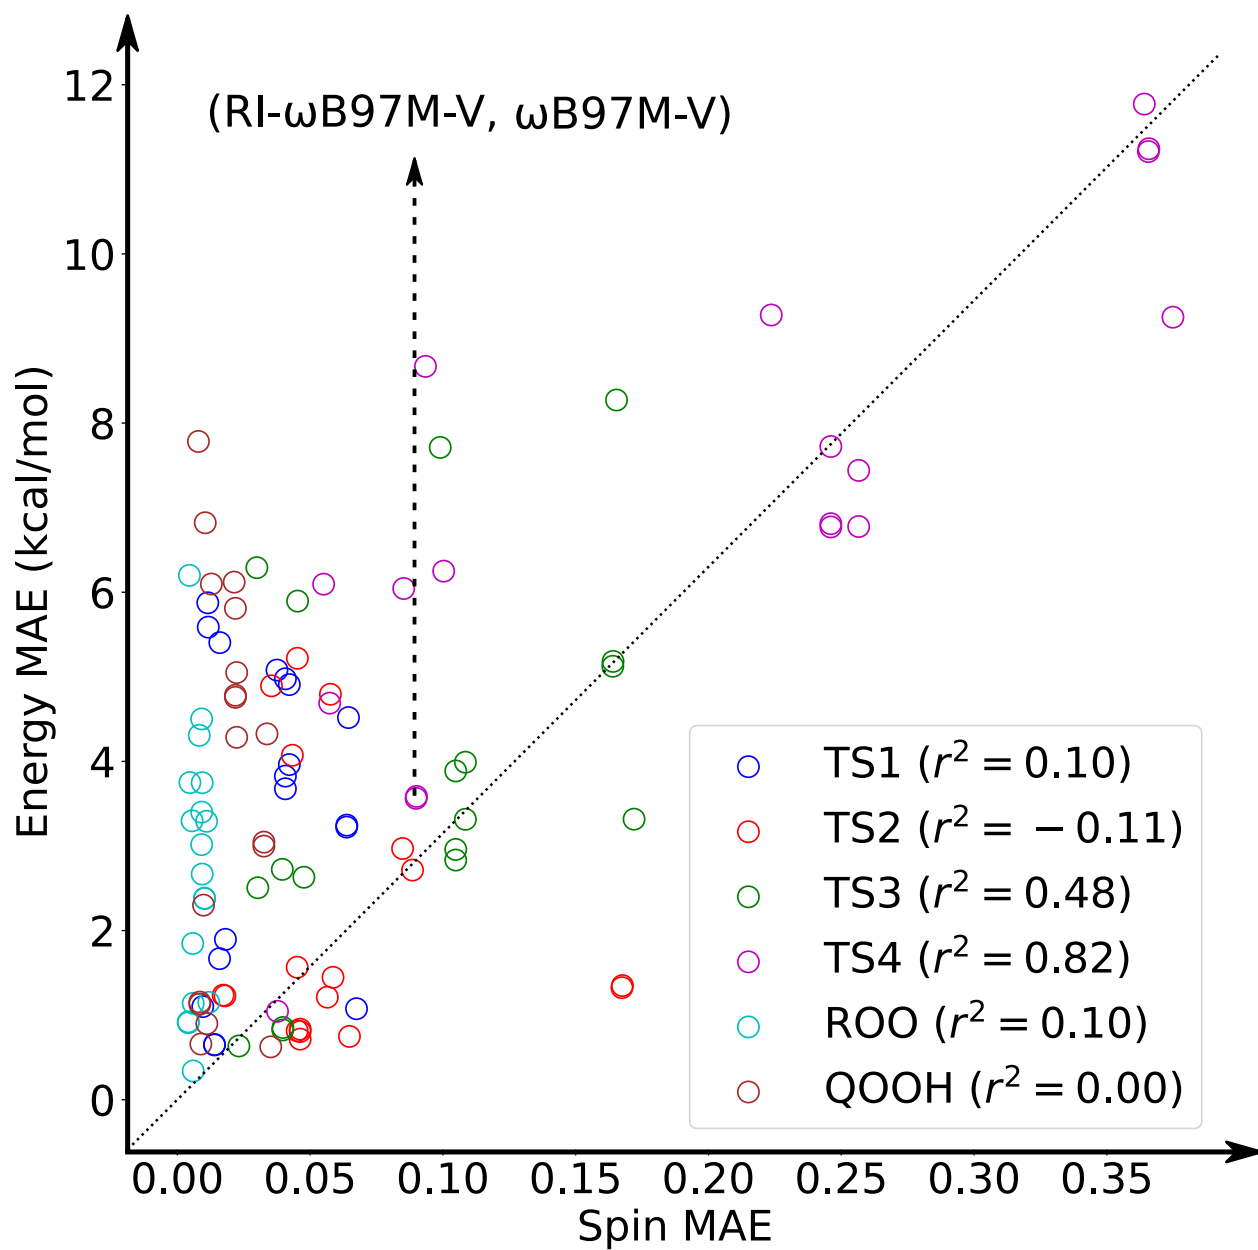

Figure S2: Scatter plot between energy mean absolute error (Energy MAE) and spin mean absolute error (Spin MAE) for reaction species. Each point in the plot represents a DFT functional for the given species. Values in the parenthesis are Pearson's correlation coefficient.

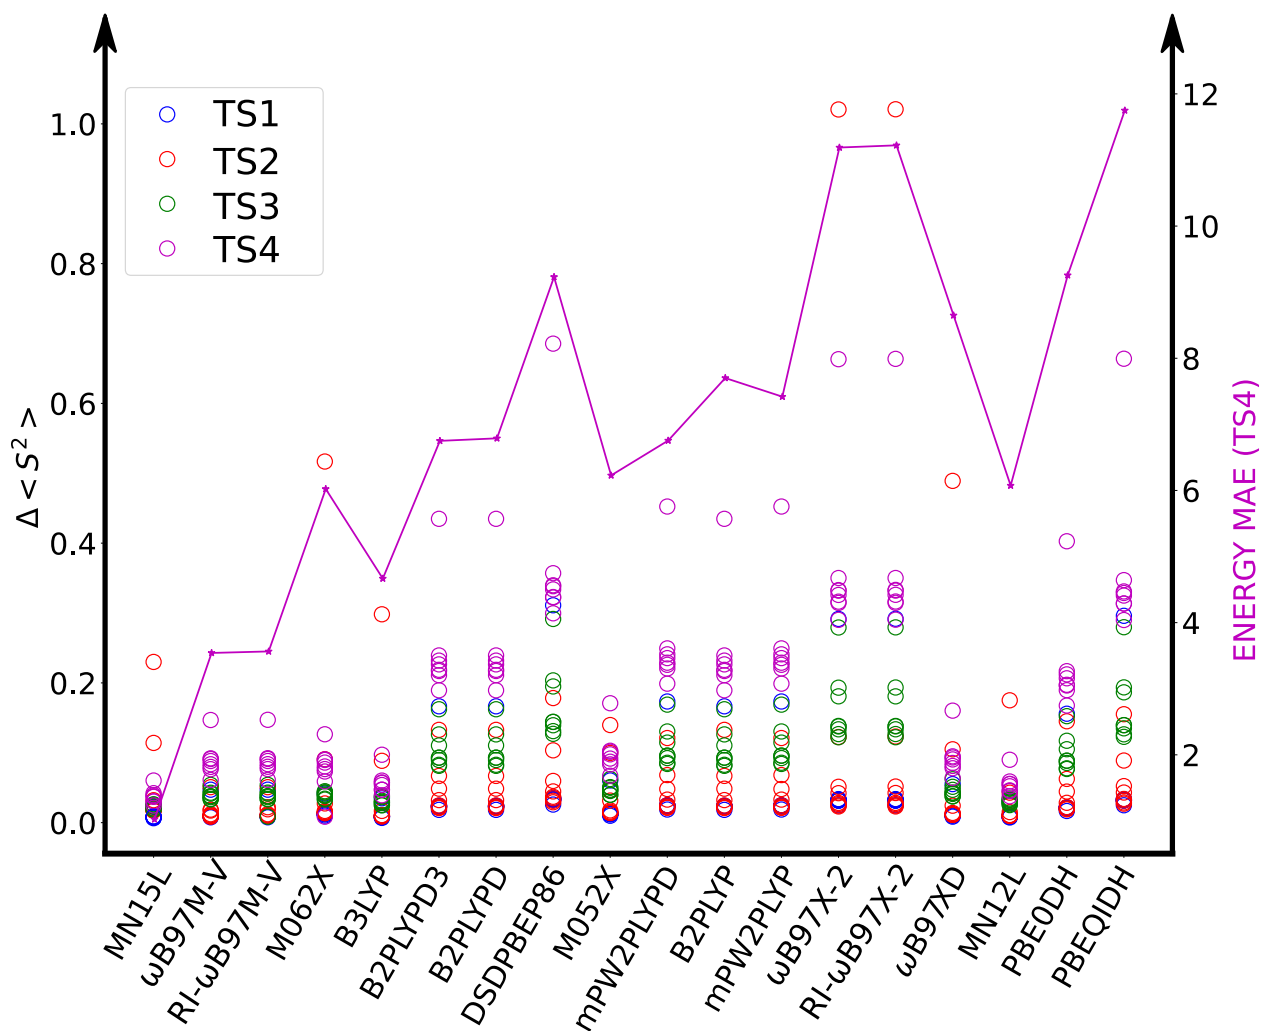

Figure S3: Scatter plot showing the difference between ideal and calculated  $\langle S^2 \rangle$  values of TS of all systems for all DFT functionals. The left-hand side y-axis represents  $\Delta \langle S^2 \rangle$  values. The solid pink line and the right-hand side y-axis represent the MAD for TS4. Methods are sorted in ascending order of MAD for TS.

# Low-temperature hydrocarbon combustion mechanism and the associated reactive intermediates for R.

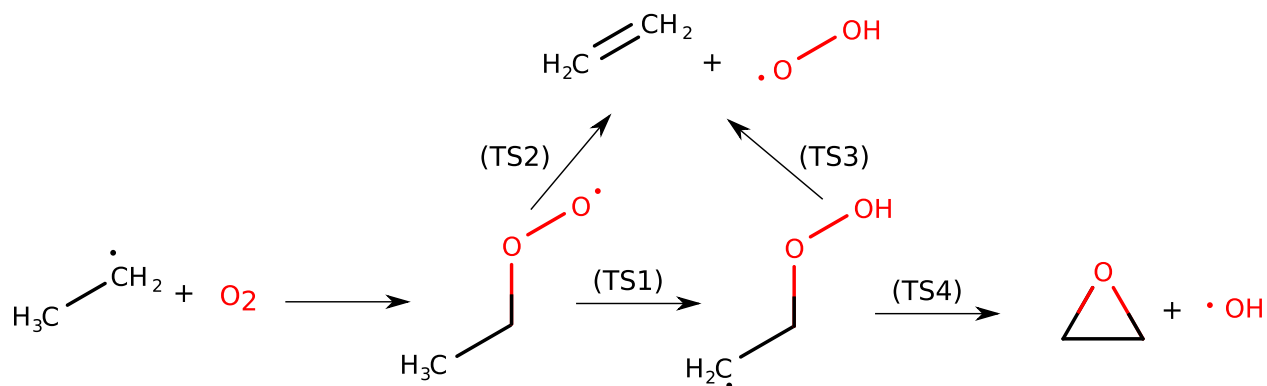

Figure S4: The reactive intermediates for ethyl radical combustion

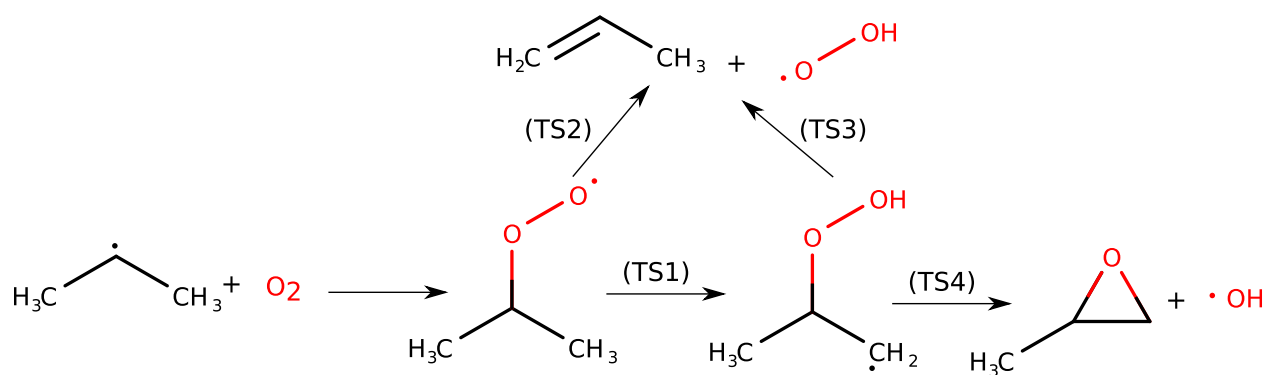

Figure S5: The reactive intermediates for isopropyl radical combustion

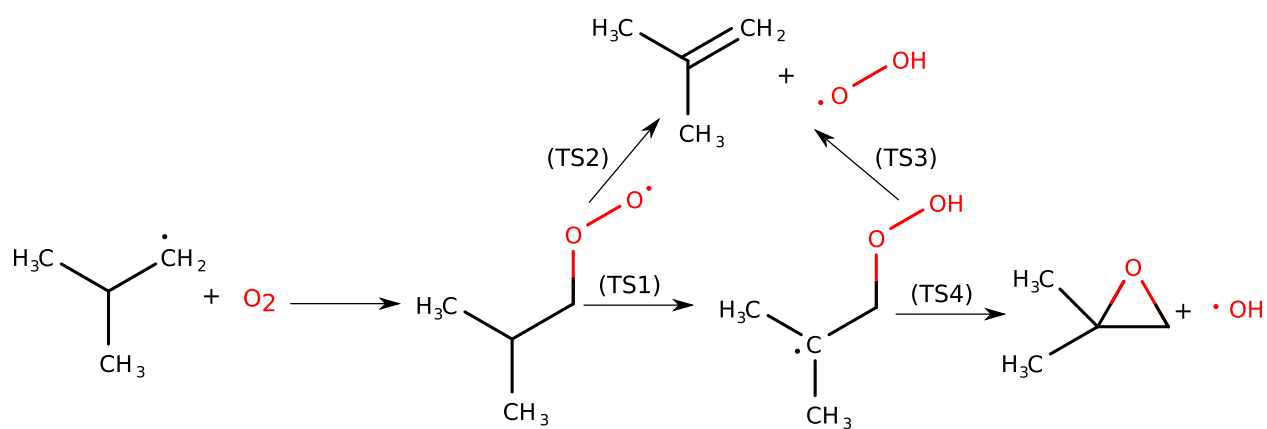

Figure S6: The reactive intermediates for isobutyl radical combustion

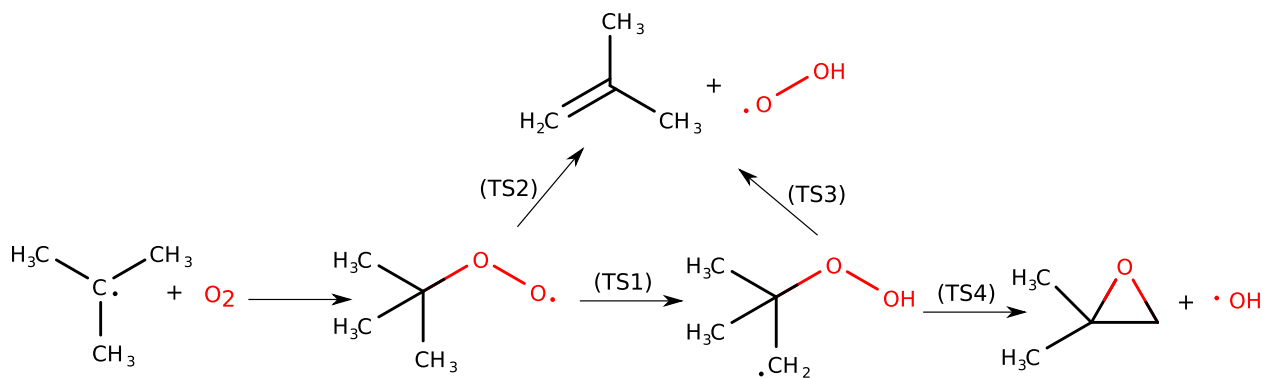

Figure S7: The reactive intermediates for tertbutyl radical combustion

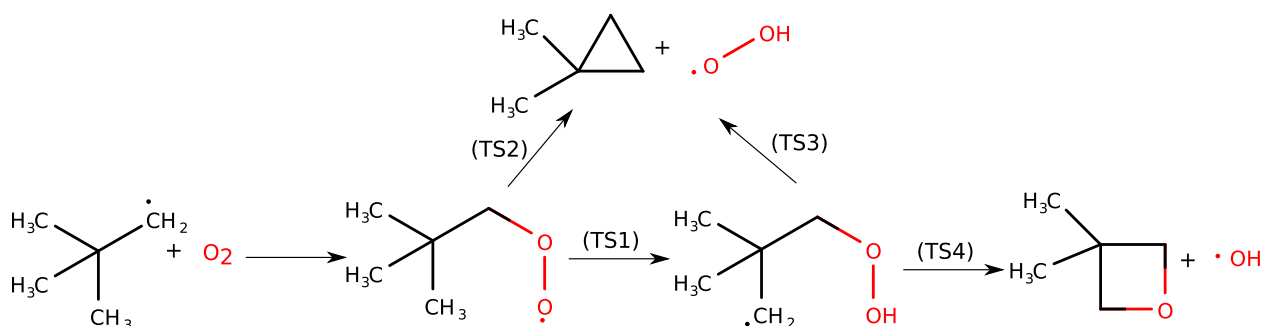

Figure S8: The reactive intermediates for neopentyl radical combustion

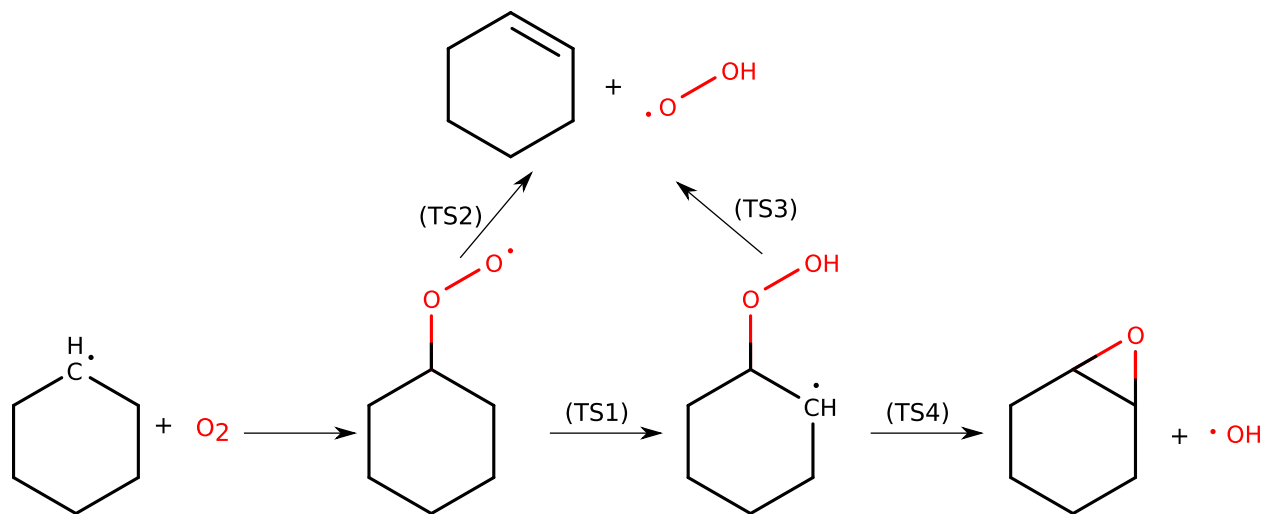

Figure S9: The reactive intermediates for cyclohexyl radical combustion



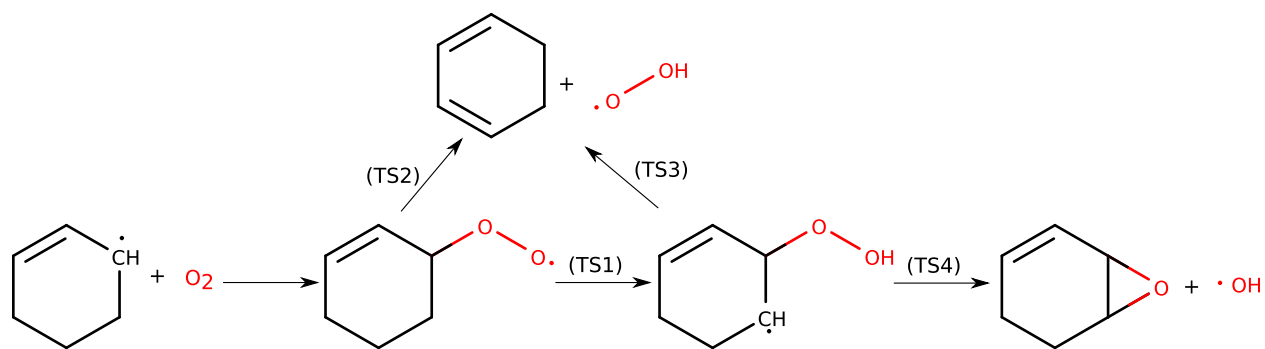

Figure S10: The reactive intermediates for  $\alpha$ -cyclohexenyl radical combustion

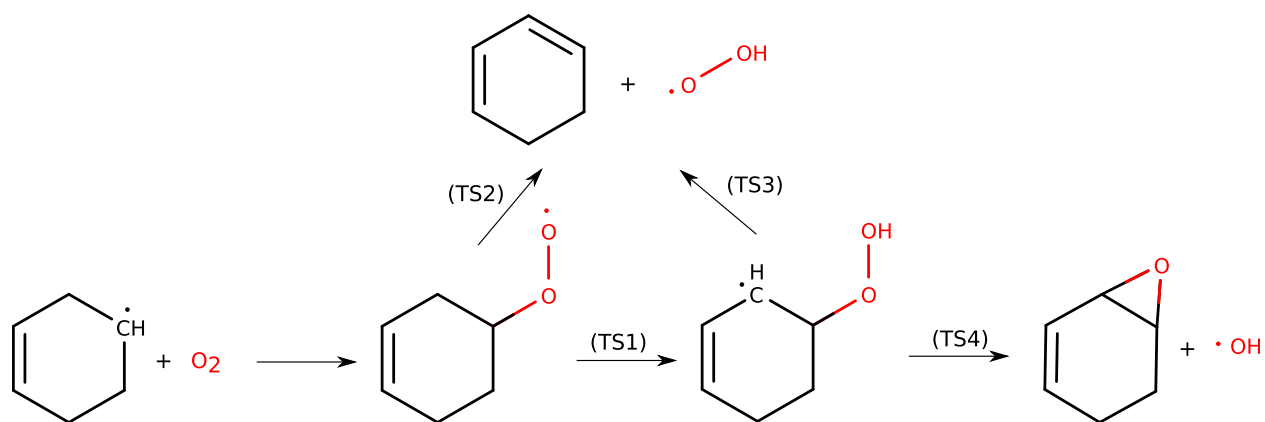

Figure S11: The reactive intermediates for  $\beta$ -cyclohexenyl radical combustion

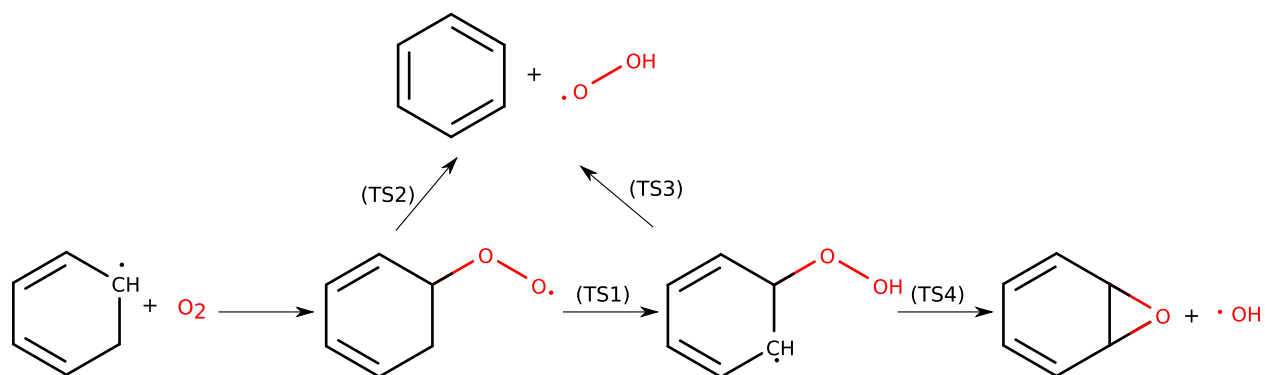

Figure S12: The reactive intermediates for cyclohexadienyl radical combustion

# IRC Profiles for the different reactions in low-temperature combustion

The IRC profiles are represented in the following order for all the hydrocarbons

- $\text{ROO}\cdot \xrightarrow{\text{TS1}} \cdot\text{QOOH}$
- $\text{ROO}\cdot \xrightarrow{\text{TS2}} \text{alkene} + \cdot\text{OOH}$
- $\cdot\text{QOOH} \xrightarrow{\text{TS3}} \text{alkene} + \cdot\text{OOH}$
- $\cdot\text{QOOH} \xrightarrow{\text{TS4}} \text{cycloether} + \cdot\text{OH}$

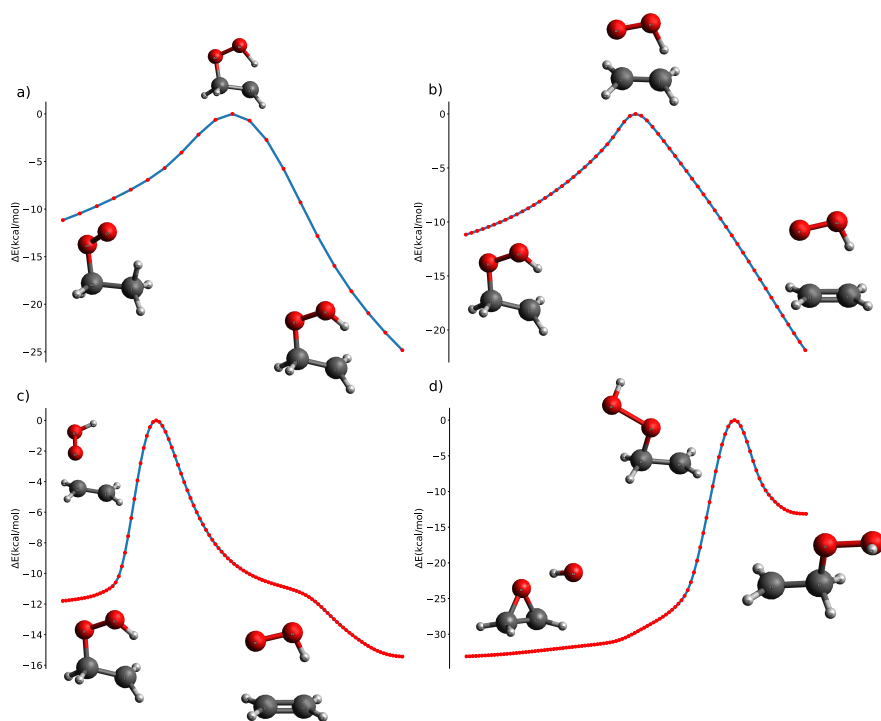

Figure S13: The IRC profile for the combustion of ethyl radical

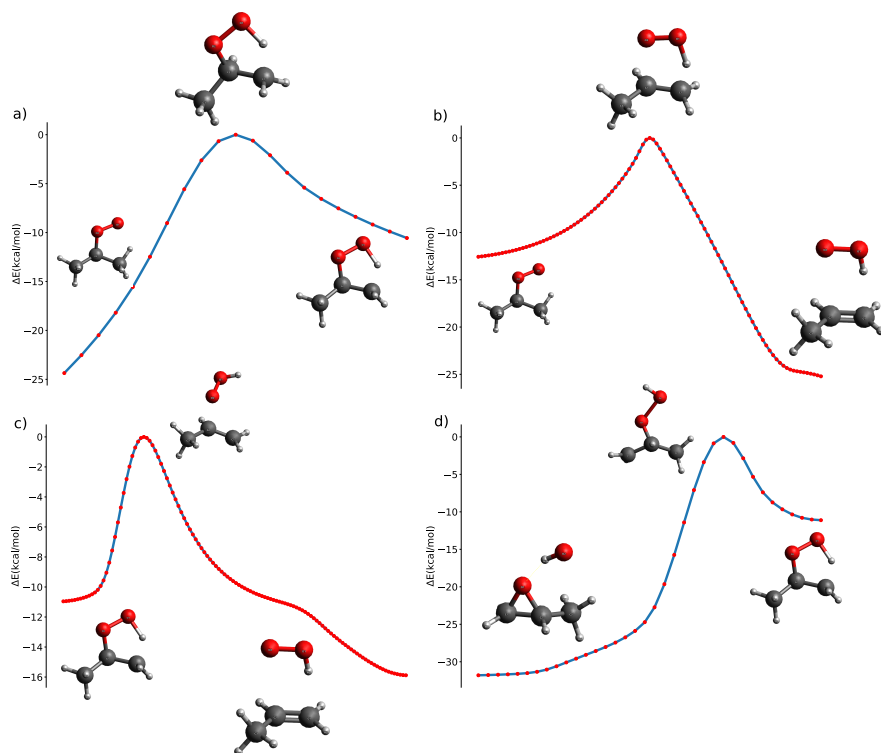

Figure S14: The IRC profile for the combustion of isopropyl radical

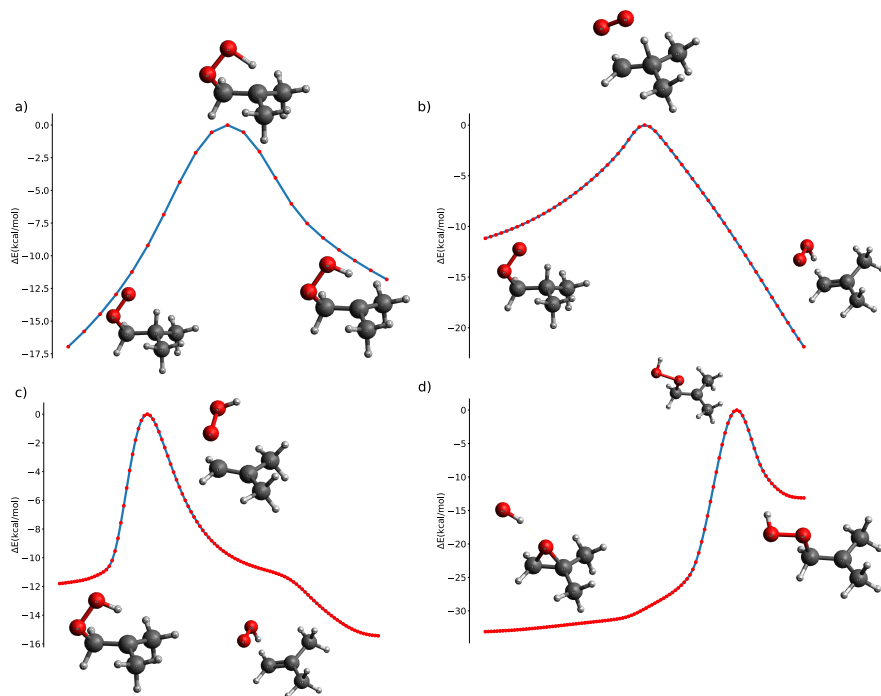

Figure S15: The IRC profile for the combustion of isobutyl radical

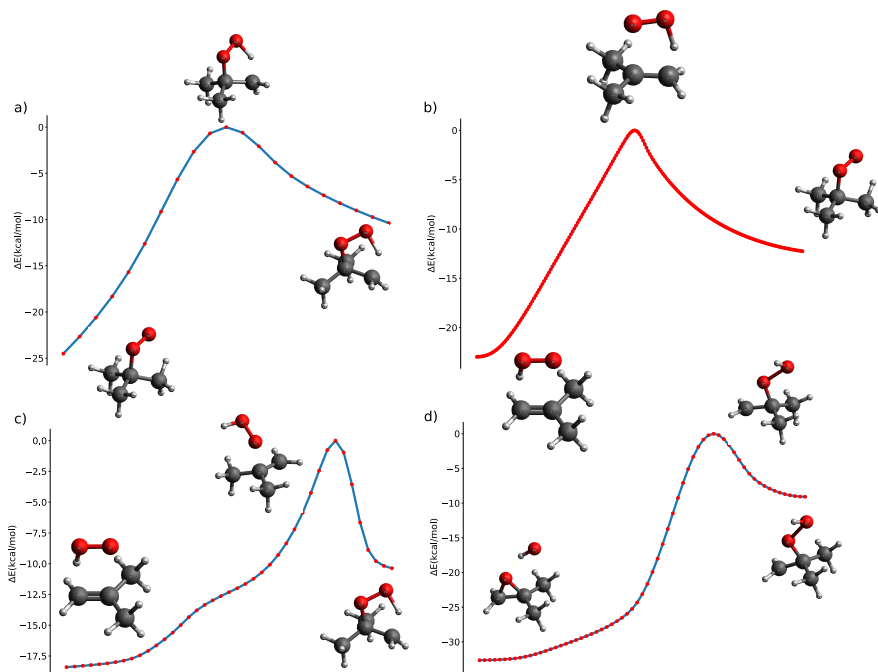

Figure S16: The IRC profile for the combustion of tertbutyl radical

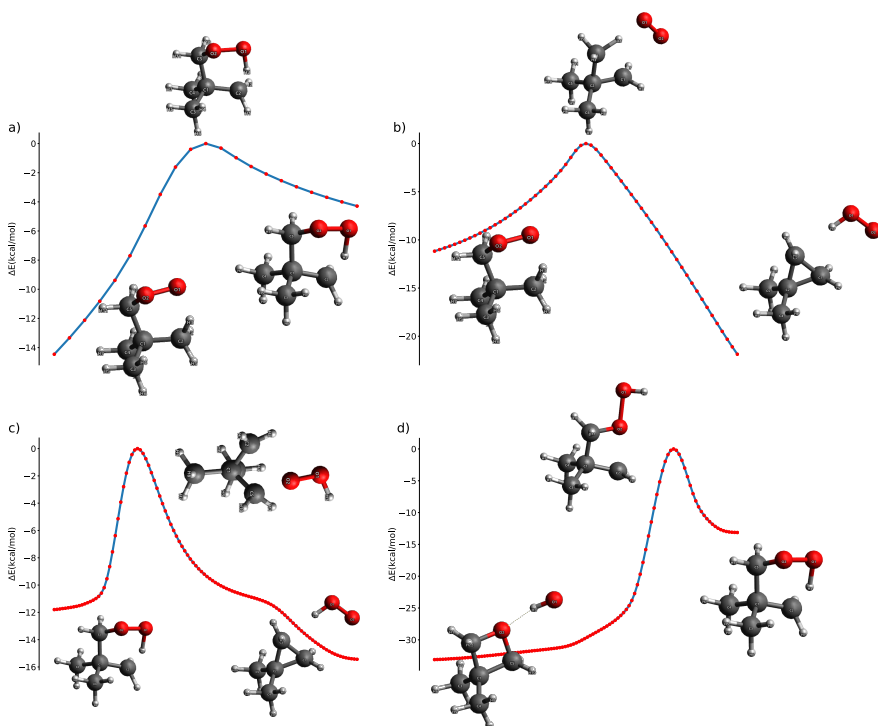

Figure S17: The IRC profile for the combustion of neopentyl radical

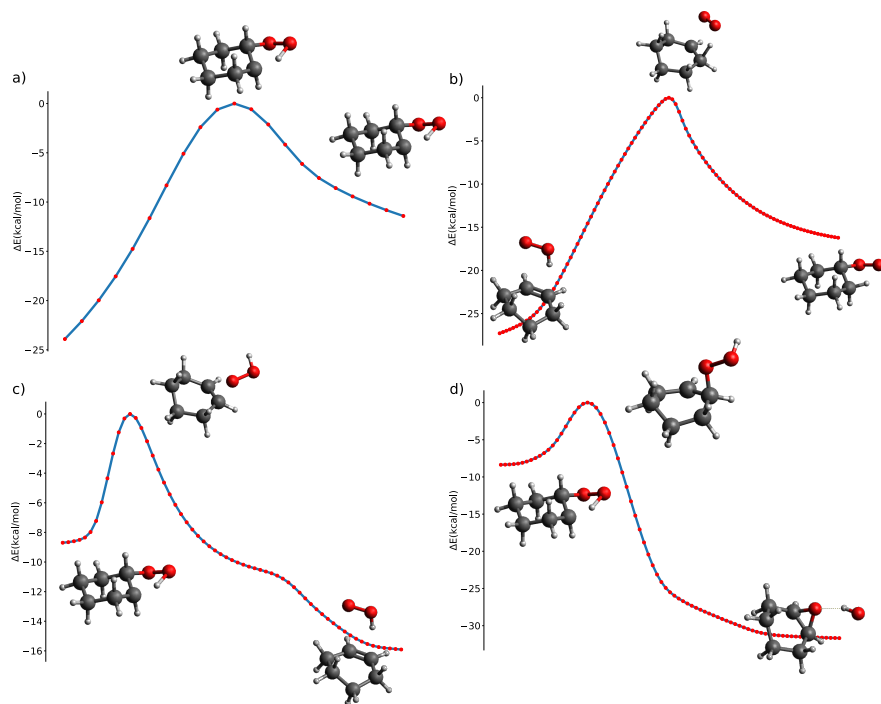

Figure S18: The IRC profile for the combustion of cyclohexyl radical

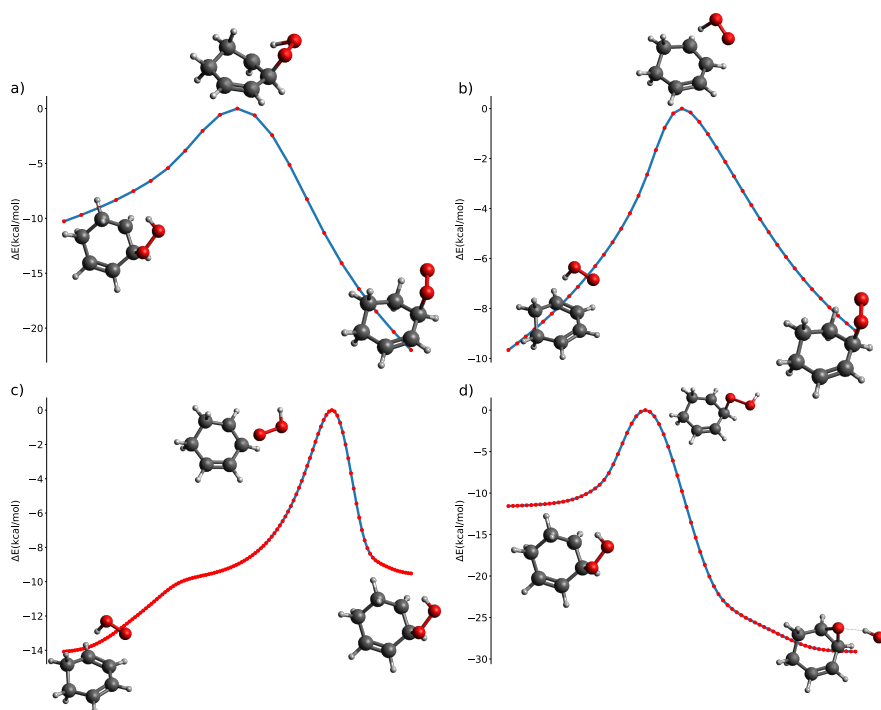

Figure S19: The IRC profile for the combustion of  $\alpha$ -cyclohexenyl radical

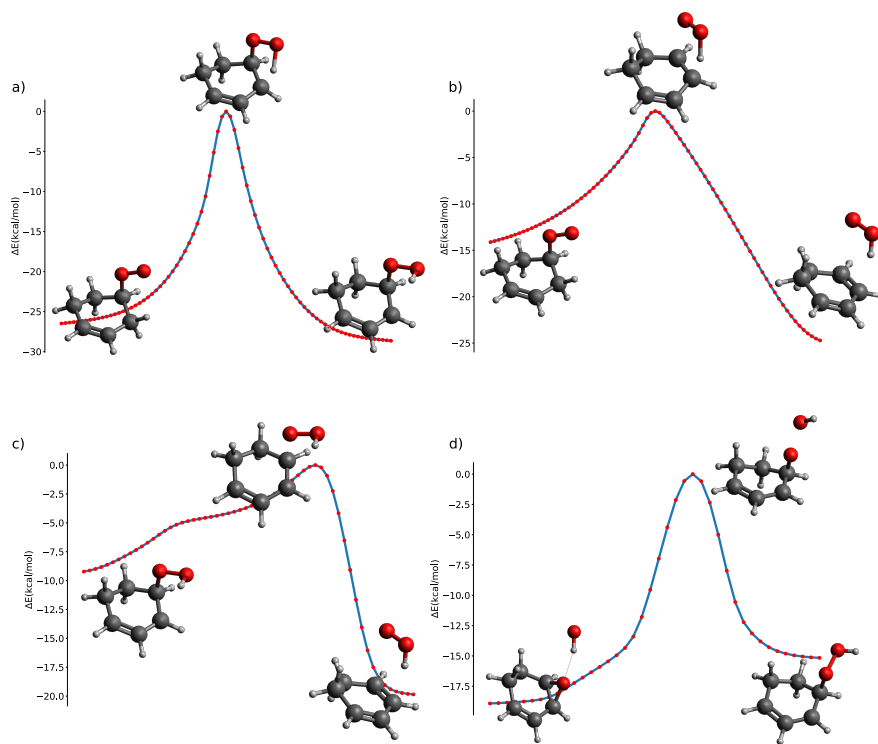

Figure S20: The IRC profile for the combustion of  $\beta$ -cyclohexenyl radical

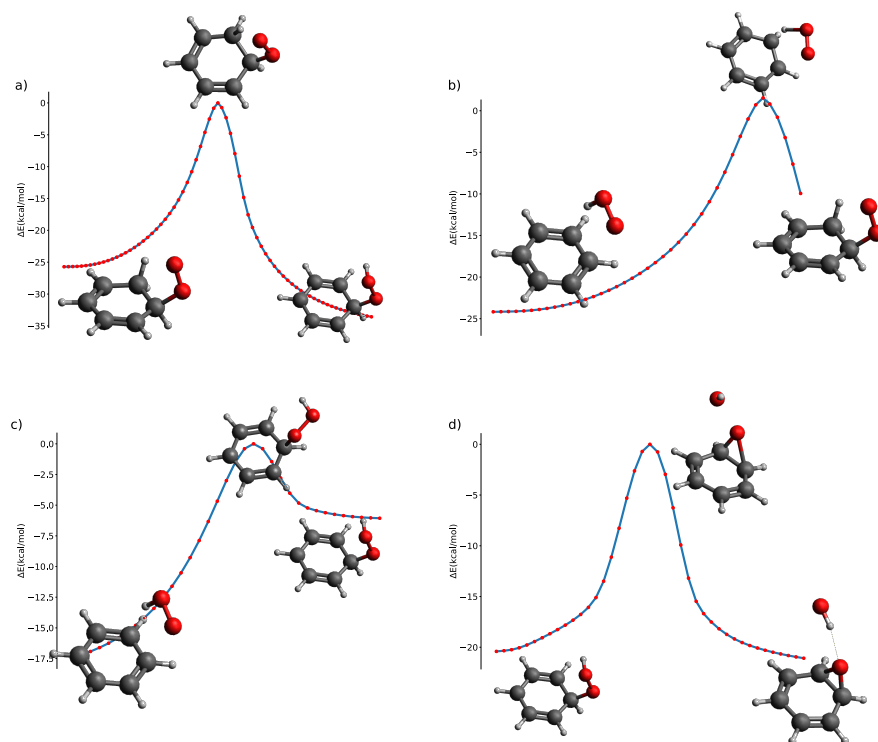

Figure S21: The IRC profile for the combustion of cyclohexadienyl radical

# W1-level equilibrium geometry, harmonic frequencies, and thermochemistry energies of different reaction species involved in combustion reaction of R.

## Hydrocarbon 1: ethyl

### Species 1: ·R

[ W1 data ]

== B3LYP/cc-pVTZ+d equilibrium geometry (Angstrom) ==

|   |           |           |           |
|---|-----------|-----------|-----------|
| C | 0.691636  | -0.000000 | -0.002049 |
| C | -0.792081 | 0.000000  | -0.017585 |
| H | 1.103759  | -0.884476 | -0.491892 |
| H | 1.091851  | 0.000004  | 1.022920  |
| H | 1.103759  | 0.884472  | -0.491898 |
| H | -1.348350 | -0.924419 | 0.039336  |
| H | -1.348349 | 0.924419  | 0.039336  |

== B3LYP/cc-pVTZ+d harmonic frequencies (cm<sup>-1</sup>) ==

|           |           |           |           |           |           |           |
|-----------|-----------|-----------|-----------|-----------|-----------|-----------|
| 104.8073  | 486.2223  | 813.8449  | 982.2743  | 1061.8581 | 1195.8772 | 1402.1395 |
| 1467.3672 | 1481.5538 | 1482.2557 | 2943.0673 | 3034.7866 | 3077.3432 | 3142.6027 |
| 3240.6016 |           |           |           |           |           |           |

== Thermochemistry energies (hartree) ==

ZPVE = 0.058156 (after scaling by 0.985)  
W1 Ee = -79.168722 (total electronic energy)  
W1 U0 = -79.110566 (Zero-kelvin internal energy)

[ CCSDT-F12a/cc-pVDZ-F12 data ]

CCSD(T)-F12a/cc-pVDZ-F12 Ee = -79.029415 (total electronic energy)

## Species 2: ROO·

[ W1 data ]

== B3LYP/cc-pVTZ+d equilibrium geometry (Angstrom) ==

|   |           |           |           |
|---|-----------|-----------|-----------|
| C | 1.744457  | -0.181342 | -0.000005 |
| C | 0.414201  | 0.535217  | 0.000005  |
| H | 1.852261  | -0.807843 | 0.884837  |
| H | 2.551771  | 0.551299  | -0.000002 |
| H | 1.852256  | -0.807830 | -0.884857 |
| O | -0.633958 | -0.480438 | 0.000009  |
| H | 0.265409  | 1.148873  | 0.887848  |
| H | 0.265397  | 1.148879  | -0.887833 |
| O | -1.833422 | 0.060860  | -0.000007 |

== B3LYP/cc-pVTZ+d harmonic frequencies (cm<sup>-1</sup>) ==

|           |           |           |           |           |           |           |
|-----------|-----------|-----------|-----------|-----------|-----------|-----------|
| 74.2528   | 223.5669  | 307.1919  | 502.3475  | 805.6244  | 841.9603  | 1015.2529 |
| 1133.9237 | 1150.2037 | 1193.6478 | 1278.2306 | 1381.0735 | 1420.0700 | 1486.8332 |
| 1496.2760 | 1508.8877 | 3043.2166 | 3055.1942 | 3096.0954 | 3109.4166 | 3120.8248 |

== Thermochemistry energies (hartree) ==

ZPVE = 0.070111 (after scaling by 0.985)  
W1 Ee = -229.643821 (total electronic energy)  
W1 U0 = -229.573710 (Zero-kelvin internal energy)

[ CCSDT-F12a/cc-pVDZ-F12 data ]

CCSD(T)-F12a/cc-pVDZ-F12 Ee = -229.268433 (total electronic energy)



### Species 3: ·QOOH

[ W1 data ]

== B3LYP/cc-pVTZ+d equilibrium geometry (Angstrom) ==

|   |           |           |           |
|---|-----------|-----------|-----------|
| C | -1.852200 | -0.166980 | 0.027775  |
| C | -0.531369 | 0.493419  | 0.058741  |
| H | -2.708700 | 0.334573  | -0.394654 |
| H | -1.980039 | -1.139938 | 0.478434  |
| O | 0.457468  | -0.513383 | -0.173682 |
| H | -0.450756 | 1.278182  | -0.699368 |
| H | -0.333842 | 0.959118  | 1.037207  |
| O | 1.752335  | 0.130903  | -0.036404 |
| H | 2.096334  | -0.330729 | 0.739984  |

== B3LYP/cc-pVTZ+d harmonic frequencies (cm<sup>-1</sup>) ==

|           |           |           |           |           |           |           |
|-----------|-----------|-----------|-----------|-----------|-----------|-----------|
| 110.0437  | 129.5381  | 203.3557  | 300.0234  | 469.0284  | 512.6005  | 819.4553  |
| 933.8400  | 986.9561  | 1071.2743 | 1143.1600 | 1225.4651 | 1359.2805 | 1383.6467 |
| 1454.7737 | 1496.5921 | 2921.5501 | 3022.7943 | 3156.2382 | 3264.6239 | 3758.8937 |

== Thermochemistry energies (hartree) ==

ZPVE = 0.066698 (after scaling by 0.985)  
W1 Ee = -229.614038 (total electronic energy)  
W1 U0 = -229.547339 (Zero-kelvin internal energy)

[ CCSDT-F12a/cc-pVDZ-F12 data ]

CCSD(T)-F12a/cc-pVDZ-F12 Ee = -229.238190 (total electronic energy)

#### Species 4: *cy*-ether

[ W1 data ]

== B3LYP/cc-pVTZ+d equilibrium geometry (Angstrom) ==

|   |           |           |           |
|---|-----------|-----------|-----------|
| C | 0.731430  | -0.371702 | 0.000000  |
| C | -0.731430 | -0.371702 | -0.000000 |
| O | -0.000000 | 0.853606  | -0.000000 |
| H | 1.266004  | -0.592106 | -0.918210 |
| H | 1.266004  | -0.592106 | 0.918209  |
| H | -1.266003 | -0.592106 | 0.918210  |
| H | -1.266004 | -0.592106 | -0.918209 |

== B3LYP/cc-pVTZ+d harmonic frequencies (cm<sup>-1</sup>) ==

|           |           |           |           |           |           |           |
|-----------|-----------|-----------|-----------|-----------|-----------|-----------|
| 820.9816  | 846.5212  | 892.4287  | 1047.1821 | 1150.3912 | 1156.3546 | 1171.7311 |
| 1177.3731 | 1301.7028 | 1507.0326 | 1541.1250 | 3078.8490 | 3085.5370 | 3157.5797 |
| 3173.3447 |           |           |           |           |           |           |

== Thermochemistry energies (hartree) ==

|         |             |                               |
|---------|-------------|-------------------------------|
| ZPVE =  | 0.056343    | (after scaling by 0.985)      |
| W1 Ee = | -153.855513 | (total electronic energy)     |
| W1 U0 = | -153.799170 | (Zero-kelvin internal energy) |

[ CCSDT-F12a/cc-pVDZ-F12 data ]

CCSD(T)-F12a/cc-pVDZ-F12 Ee = -153.598131 (total electronic energy)

## Species 5: alkene

[ W1 data ]

== B3LYP/cc-pVTZ+d equilibrium geometry (Angstrom) ==

|   |           |           |           |
|---|-----------|-----------|-----------|
| C | 0.000000  | -0.661966 | -0.000000 |
| C | 0.000000  | 0.661966  | 0.000000  |
| H | -0.920567 | -1.231546 | 0.000000  |
| H | 0.920567  | -1.231546 | -0.000000 |
| H | -0.920567 | 1.231546  | 0.000000  |
| H | 0.920567  | 1.231546  | -0.000000 |

== B3LYP/cc-pVTZ+d harmonic frequencies (cm<sup>-1</sup>) ==

|           |           |           |           |           |           |           |
|-----------|-----------|-----------|-----------|-----------|-----------|-----------|
| 835.8298  | 978.9608  | 983.5714  | 1067.0956 | 1246.4512 | 1382.3409 | 1478.8937 |
| 1693.3624 | 3126.1146 | 3139.9061 | 3195.1940 | 3223.6535 |           |           |

== Thermochemistry energies (hartree) ==

ZPVE = 0.050156 (after scaling by 0.985)  
W1 Ee = -78.604857 (total electronic energy)  
W1 U0 = -78.554701 (Zero-kelvin internal energy)

[ CCSDT-F12a/cc-pVDZ-F12 data ]

CCSD(T)-F12a/cc-pVDZ-F12 Ee = -78.465674 (total electronic energy)

Species 6: Transition state along  $\text{ROO} \cdot \xrightarrow{\text{TS1}} \cdot\text{QOOH}$

[ W1 data ]

== B3LYP/cc-pVTZ+d equilibrium geometry (Angstrom) ==

|   |           |           |           |
|---|-----------|-----------|-----------|
| C | -1.222388 | -0.566466 | -0.119613 |
| H | -1.941196 | -0.966413 | 0.586382  |
| H | 0.022943  | -1.137914 | 0.059018  |
| H | -1.471076 | -0.736313 | -1.162951 |
| C | -0.540324 | 0.752654  | 0.211403  |
| H | -0.961280 | 1.623724  | -0.293709 |
| H | -0.528184 | 0.915931  | 1.291989  |
| O | 0.791214  | 0.598096  | -0.290043 |
| O | 1.140669  | -0.700114 | 0.161109  |

== B3LYP/cc-pVTZ+d harmonic frequencies (cm<sup>-1</sup>) ==

|            |           |           |           |           |           |           |
|------------|-----------|-----------|-----------|-----------|-----------|-----------|
| -2274.2560 | 274.9541  | 438.7388  | 554.4706  | 687.2618  | 868.9591  | 899.9893  |
| 906.2836   | 962.5398  | 1047.0938 | 1110.8987 | 1169.2613 | 1244.6992 | 1346.9688 |
| 1456.7294  | 1499.5115 | 1723.6265 | 3022.5170 | 3077.4755 | 3101.5997 | 3192.2292 |

== Thermochemistry energies (hartree) ==

ZPVE = 0.064146 (after scaling by 0.985)  
W1 Ee = -229.578911 (total electronic energy)  
W1 U0 = -229.514765 (Zero-kelvin internal energy)

[ CCSDT-F12a/cc-pVDZ-F12 data ]

CCSD(T)-F12a/cc-pVDZ-F12 Ee = -229.203690 (total electronic energy)

Species 7: Transition state along  $\text{ROO} \cdot \xrightarrow{\text{TS2}} \text{alkene} + \cdot\text{OOH}$

[ W1 data ]

== B3LYP/cc-pVTZ+d equilibrium geometry (Angstrom) ==

|   |           |           |           |
|---|-----------|-----------|-----------|
| C | -1.285569 | -0.616825 | 0.000027  |
| H | -1.630771 | -1.085342 | 0.915429  |
| H | 0.026458  | -0.950626 | -0.000075 |
| H | -1.630877 | -1.085201 | -0.915406 |
| C | -1.044096 | 0.743790  | 0.000118  |
| H | -1.023461 | 1.316997  | -0.914815 |
| H | -1.023353 | 1.316856  | 0.915137  |
| O | 1.145733  | 0.615227  | -0.000019 |
| O | 1.261766  | -0.649536 | -0.000123 |

== B3LYP/cc-pVTZ+d harmonic frequencies ( $\text{cm}^{-1}$ ) ==

|            |           |           |           |           |           |           |
|------------|-----------|-----------|-----------|-----------|-----------|-----------|
| -1089.2415 | 216.0393  | 354.2849  | 478.9129  | 516.9775  | 643.5291  | 832.9459  |
| 891.5177   | 1016.0131 | 1040.6236 | 1233.2915 | 1299.5412 | 1315.1097 | 1334.4709 |
| 1474.4510  | 1571.0968 | 1599.0782 | 3102.4777 | 3160.7059 | 3177.7927 | 3246.4129 |

== Thermochemistry energies (hartree) ==

ZPVE = 0.063966 (after scaling by 0.985)  
W1 Ee = -229.587475 (total electronic energy)  
W1 U0 = -229.523509 (Zero-kelvin internal energy)

[ CCSDT-F12a/cc-pVDZ-F12 data ]

CCSD(T)-F12a/cc-pVDZ-F12 Ee = -229.211904 (total electronic energy)

Species 8: Transition state along  $\cdot\text{QOOH} \xrightarrow{\text{TS3}} \text{alkene} + \cdot\text{OOH}$

[ W1 data ]

== B3LYP/cc-pVTZ+d equilibrium geometry (Angstrom) ==

|   |           |           |           |
|---|-----------|-----------|-----------|
| C | -1.625492 | 0.535263  | -0.115726 |
| H | -2.181955 | 0.478982  | -1.040579 |
| H | 1.676417  | 1.144824  | -0.288345 |
| H | -1.556027 | 1.502362  | 0.362906  |
| C | -0.927126 | -0.548362 | 0.362641  |
| H | -0.522174 | -0.530436 | 1.363983  |
| H | -1.134012 | -1.532305 | -0.034874 |
| O | 0.760953  | -0.468441 | -0.484652 |
| O | 1.618229  | 0.345337  | 0.254079  |

== B3LYP/cc-pVTZ+d harmonic frequencies (cm<sup>-1</sup>) ==

|           |           |           |           |           |           |           |
|-----------|-----------|-----------|-----------|-----------|-----------|-----------|
| -533.1097 | 91.2057   | 227.0998  | 306.5308  | 415.9603  | 470.6679  | 817.9757  |
| 835.6601  | 918.9880  | 1030.2604 | 1084.6426 | 1244.5559 | 1263.4251 | 1382.3208 |
| 1470.8280 | 1549.3441 | 3140.8926 | 3144.8996 | 3216.0621 | 3241.8410 | 3717.4656 |

== Thermochemistry energies (hartree) ==

ZPVE = 0.066356 (after scaling by 0.985)  
W1 Ee = -229.586871 (total electronic energy)  
W1 U0 = -229.520514 (Zero-kelvin internal energy)

[ CCSDT-F12a/cc-pVDZ-F12 data ]

CCSD(T)-F12a/cc-pVDZ-F12 Ee = -229.211256 (total electronic energy)

Species 9: Transition state along  $\cdot\text{QOOH} \xrightarrow{\text{TS4}} \text{cycloether} + \cdot\text{OH}$

[ W1 data ]

== B3LYP/cc-pVTZ+d equilibrium geometry (Angstrom) ==

|   |           |           |           |
|---|-----------|-----------|-----------|
| C | 1.694417  | -0.258022 | 0.043055  |
| H | 2.126977  | -0.605577 | -0.881634 |
| H | -2.125997 | -0.710448 | 0.532811  |
| H | 1.991309  | -0.727872 | 0.967095  |
| C | 0.582893  | 0.704239  | 0.030160  |
| H | 0.404487  | 1.231206  | 0.968323  |
| H | 0.540807  | 1.384108  | -0.822162 |
| O | -0.200115 | -0.444105 | -0.124266 |
| O | -1.875066 | 0.038015  | -0.026199 |

== B3LYP/cc-pVTZ+d harmonic frequencies (cm<sup>-1</sup>) ==

|           |           |           |           |           |           |           |
|-----------|-----------|-----------|-----------|-----------|-----------|-----------|
| -753.5035 | 90.8140   | 134.8719  | 258.8011  | 400.1051  | 505.8126  | 781.5253  |
| 838.0150  | 937.2796  | 997.2226  | 1166.4545 | 1170.4344 | 1203.4706 | 1317.1301 |
| 1471.1226 | 1535.9148 | 3031.5855 | 3084.1669 | 3167.4547 | 3281.3366 | 3777.9256 |

== Thermochemistry energies (hartree) ==

ZPVE = 0.065416 (after scaling by 0.985)  
W1 Ee = -229.589061 (total electronic energy)  
W1 U0 = -229.523646 (Zero-kelvin internal energy)

[ CCSDT-F12a/cc-pVDZ-F12 data ]

CCSD(T)-F12a/cc-pVDZ-F12 Ee = -229.213812 (total electronic energy)

## Hydrocarbon 2: isopropyl

### Species 1: ·R

[ W1 data ]

== B3LYP/cc-pVTZ+d equilibrium geometry (Angstrom) ==

|   |           |           |           |
|---|-----------|-----------|-----------|
| C | 1.294138  | -0.197180 | 0.002337  |
| C | -0.000000 | 0.532887  | -0.041105 |
| C | -1.294138 | -0.197180 | 0.002337  |
| H | 2.139669  | 0.453710  | -0.221196 |
| H | 1.309964  | -1.030634 | -0.708112 |
| H | 1.483889  | -0.641834 | 0.991608  |
| H | 0.000000  | 1.606355  | 0.093979  |
| H | -1.309964 | -1.030634 | -0.708112 |
| H | -2.139669 | 0.453710  | -0.221196 |
| H | -1.483889 | -0.641835 | 0.991608  |

== B3LYP/cc-pVTZ+d harmonic frequencies (cm<sup>-1</sup>) ==

|           |           |           |           |           |           |           |
|-----------|-----------|-----------|-----------|-----------|-----------|-----------|
| 108.0142  | 110.0636  | 351.0519  | 390.5172  | 884.7674  | 941.2064  | 948.1429  |
| 1029.2895 | 1146.0139 | 1181.1098 | 1371.8999 | 1409.4355 | 1414.2704 | 1468.3527 |
| 1477.4209 | 1478.6875 | 1491.0577 | 2933.1961 | 2937.2405 | 3007.7790 | 3009.0800 |
| 3082.4644 | 3083.5626 | 3167.9761 |           |           |           |           |

== Thermochemistry energies (hartree) ==

ZPVE = 0.086220 (after scaling by 0.985)  
W1 Ee = -118.495776 (total electronic energy)  
W1 U0 = -118.409556 (Zero-kelvin internal energy)

[ CCSDT-F12a/cc-pVDZ-F12 data ]

CCSD(T)-F12a/cc-pVDZ-F12 Ee = -118.286801 (total electronic energy)



## Species 2: ROO·

[ W1 data ]

== B3LYP/cc-pVTZ+d equilibrium geometry (Angstrom) ==

|   |           |           |           |
|---|-----------|-----------|-----------|
| C | 1.557589  | -0.849100 | 0.019749  |
| C | 0.367826  | 0.018772  | -0.337445 |
| C | 0.486014  | 1.463512  | 0.108219  |
| H | 1.401385  | -1.878604 | -0.300108 |
| H | 1.732552  | -0.841900 | 1.096080  |
| H | 2.451715  | -0.467755 | -0.473428 |
| H | 0.689245  | 1.522585  | 1.178287  |
| H | -0.435814 | 2.000834  | -0.107015 |
| H | 1.302902  | 1.950956  | -0.425191 |
| O | -0.787241 | -0.604232 | 0.337199  |
| O | -1.931838 | -0.151722 | -0.125850 |
| H | 0.142070  | -0.037586 | -1.402548 |

== B3LYP/cc-pVTZ+d harmonic frequencies (cm<sup>-1</sup>) ==

|           |           |           |           |           |           |           |
|-----------|-----------|-----------|-----------|-----------|-----------|-----------|
| 99.0371   | 199.7081  | 237.6007  | 302.5951  | 343.0845  | 449.4491  | 521.4669  |
| 791.9765  | 886.3322  | 939.9622  | 950.6077  | 1123.5137 | 1153.2153 | 1195.9904 |
| 1204.7216 | 1344.1207 | 1368.1951 | 1403.3738 | 1421.4108 | 1482.8878 | 1488.9614 |
| 1494.3705 | 1511.5021 | 3036.2506 | 3040.9106 | 3062.2310 | 3099.6125 | 3109.6361 |
| 3112.3951 | 3120.3661 |           |           |           |           |           |

== Thermochemistry energies (hartree) ==

ZPVE = 0.097604 (after scaling by 0.985)  
W1 Ee = -268.972923 (total electronic energy)  
W1 U0 = -268.875319 (Zero-kelvin internal energy)

[ CCSDT-F12a/cc-pVDZ-F12 data ]

CCSD(T)-F12a/cc-pVDZ-F12 Ee = -268.527989 (total electronic energy)

### Species 3: ·QOOH

[ W1 data ]

== B3LYP/cc-pVTZ+d equilibrium geometry (Angstrom) ==

|   |           |           |           |
|---|-----------|-----------|-----------|
| C | 1.690585  | -0.689674 | 0.023809  |
| C | 0.415876  | 0.074284  | -0.336531 |
| C | 0.439022  | 1.491088  | 0.110637  |
| H | 1.608619  | -1.728445 | -0.295243 |
| H | 1.860184  | -0.664931 | 1.100346  |
| H | 2.547635  | -0.234432 | -0.470990 |
| H | 0.529234  | 1.713122  | 1.166125  |
| H | 0.388342  | 2.311646  | -0.589110 |
| O | -0.628624 | -0.676243 | 0.322328  |
| O | -1.905372 | -0.206703 | -0.174531 |
| H | 0.238717  | 0.015634  | -1.412699 |
| H | -2.173658 | 0.396793  | 0.531707  |

== B3LYP/cc-pVTZ+d harmonic frequencies (cm<sup>-1</sup>) ==

|           |           |           |           |           |           |           |
|-----------|-----------|-----------|-----------|-----------|-----------|-----------|
| 83.4052   | 136.1081  | 217.1285  | 232.7340  | 279.5208  | 336.2052  | 456.4842  |
| 482.5275  | 583.7069  | 829.8867  | 906.5006  | 926.8397  | 947.8389  | 1035.7493 |
| 1154.3802 | 1175.6436 | 1319.9764 | 1366.9110 | 1378.9031 | 1398.3131 | 1458.5600 |
| 1484.4061 | 1496.7041 | 3037.0159 | 3038.9094 | 3108.8988 | 3112.6193 | 3135.6699 |
| 3246.0430 | 3747.7208 |           |           |           |           |           |

== Thermochemistry energies (hartree) ==

ZPVE = 0.094507 (after scaling by 0.985)  
W1 Ee = -268.942482 (total electronic energy)  
W1 U0 = -268.847975 (Zero-kelvin internal energy)

[ CCSDT-F12a/cc-pVDZ-F12 data ]

CCSD(T)-F12a/cc-pVDZ-F12 Ee = -268.497205 (total electronic energy)

## Species 4: *cy*-ether

[ W1 data ]

== B3LYP/cc-pVTZ+d equilibrium geometry (Angstrom) ==

|   |           |           |           |
|---|-----------|-----------|-----------|
| C | -1.506883 | 0.098067  | -0.148522 |
| C | -0.152156 | -0.036390 | 0.486086  |
| C | 1.039267  | 0.615939  | -0.060866 |
| H | -2.078321 | -0.824652 | -0.035345 |
| H | -1.413569 | 0.313775  | -1.212601 |
| H | -2.073128 | 0.903919  | 0.322991  |
| O | 0.827897  | -0.788134 | -0.239781 |
| H | -0.154185 | -0.249774 | 1.552381  |
| H | 1.863894  | 0.881375  | 0.592649  |
| H | 0.950765  | 1.214734  | -0.962017 |

== B3LYP/cc-pVTZ+d harmonic frequencies (cm<sup>-1</sup>) ==

|           |           |           |           |           |           |           |
|-----------|-----------|-----------|-----------|-----------|-----------|-----------|
| 206.0392  | 366.6399  | 410.5318  | 771.8821  | 844.8421  | 907.5872  | 974.0105  |
| 1042.0992 | 1130.0974 | 1156.6732 | 1165.3168 | 1188.0691 | 1294.1605 | 1407.0987 |
| 1439.9307 | 1483.5220 | 1497.8665 | 1531.5306 | 3028.4132 | 3078.6941 | 3085.5630 |
| 3087.1776 | 3109.8463 | 3161.6612 |           |           |           |           |

== Thermochemistry energies (hartree) ==

ZPVE = 0.083856 (after scaling by 0.985)  
W1 Ee = -193.185543 (total electronic energy)  
W1 U0 = -193.101687 (Zero-kelvin internal energy)

[ CCSDT-F12a/cc-pVDZ-F12 data ]

CCSD(T)-F12a/cc-pVDZ-F12 Ee = -192.858655 (total electronic energy)

## Species 5: alkene

[ W1 data ]

== B3LYP/cc-pVTZ+d equilibrium geometry (Angstrom) ==

|   |           |           |           |
|---|-----------|-----------|-----------|
| C | 1.230760  | -0.161964 | 0.000017  |
| C | -0.134285 | 0.452265  | -0.000173 |
| C | -1.277679 | -0.219887 | -0.000007 |
| H | 1.802769  | 0.153368  | 0.876702  |
| H | 1.803971  | 0.153838  | -0.875707 |
| H | 1.179896  | -1.250881 | -0.000295 |
| H | -0.166820 | 1.538156  | 0.000026  |
| H | -1.299008 | -1.303499 | -0.000161 |
| H | -2.233587 | 0.286535  | 0.000411  |

== B3LYP/cc-pVTZ+d harmonic frequencies (cm<sup>-1</sup>) ==

|           |           |           |           |           |           |           |
|-----------|-----------|-----------|-----------|-----------|-----------|-----------|
| 205.3893  | 426.3125  | 592.5848  | 924.6092  | 947.7973  | 950.8368  | 1030.2464 |
| 1074.7583 | 1193.2901 | 1332.4547 | 1411.1422 | 1453.1586 | 1480.3100 | 1495.1727 |
| 1713.2537 | 3014.3956 | 3055.4048 | 3091.0867 | 3122.4458 | 3129.0737 | 3209.1532 |

== Thermochemistry energies (hartree) ==

ZPVE = 0.078210 (after scaling by 0.985)  
W1 Ee = -117.931883 (total electronic energy)  
W1 U0 = -117.853673 (Zero-kelvin internal energy)

[ CCSDT-F12a/cc-pVDZ-F12 data ]

CCSD(T)-F12a/cc-pVDZ-F12 Ee = -117.723135 (total electronic energy)

Species 6: Transition state along  $\text{ROO} \cdot \xrightarrow{\text{TS1}} \cdot\text{QOOH}$

[ W1 data ]

== B3LYP/cc-pVTZ+d equilibrium geometry (Angstrom) ==

|   |           |           |           |
|---|-----------|-----------|-----------|
| C | 0.107902  | 1.380235  | -0.117394 |
| H | 0.044709  | 2.231466  | 0.551560  |
| H | -0.078164 | 1.613755  | -1.162745 |
| H | 1.361734  | 0.815538  | -0.082115 |
| C | -0.417122 | 0.033843  | 0.373739  |
| H | -0.339473 | -0.000158 | 1.465112  |
| C | -1.811936 | -0.342302 | -0.084470 |
| H | -2.540596 | 0.358274  | 0.324370  |
| H | -1.878365 | -0.321418 | -1.171945 |
| H | -2.070937 | -1.342749 | 0.263113  |
| O | 1.770664  | -0.308768 | 0.036747  |
| O | 0.507839  | -0.914402 | -0.189072 |

== B3LYP/cc-pVTZ+d harmonic frequencies (cm<sup>-1</sup>) ==

|            |           |           |           |           |           |           |
|------------|-----------|-----------|-----------|-----------|-----------|-----------|
| -2229.5380 | 193.6070  | 206.6409  | 316.4591  | 401.9669  | 482.9566  | 570.3859  |
| 653.8259   | 840.7772  | 873.2173  | 922.5457  | 956.2967  | 972.8956  | 1092.7208 |
| 1110.1643  | 1139.2020 | 1180.3636 | 1334.1392 | 1377.9033 | 1409.8930 | 1457.0231 |
| 1484.4302  | 1496.3130 | 1718.6786 | 3009.6166 | 3037.1843 | 3090.8801 | 3103.0547 |
| 3110.6763  | 3184.3479 |           |           |           |           |           |

== Thermochemistry energies (hartree) ==

ZPVE = 0.091394 (after scaling by 0.985)  
W1 Ee = -268.909011 (total electronic energy)  
W1 U0 = -268.817617 (Zero-kelvin internal energy)

[ CCSDT-F12a/cc-pVDZ-F12 data ]

CCSD(T)-F12a/cc-pVDZ-F12 Ee = -268.464270 (total electronic energy)

Species 7: Transition state along  $\text{ROO}\cdot \xrightarrow{\text{TS2}} \text{alkene} + \cdot\text{OOH}$

[ W1 data ]

== B3LYP/cc-pVTZ+d equilibrium geometry (Angstrom) ==

|   |           |           |           |
|---|-----------|-----------|-----------|
| C | -0.318352 | 1.405754  | -0.045578 |
| H | -0.077361 | 2.213988  | 0.636823  |
| H | -0.660059 | 1.718665  | -1.027834 |
| H | 0.910852  | 0.914651  | -0.306183 |
| C | -0.820927 | 0.225485  | 0.478778  |
| H | -0.755081 | 0.060857  | 1.546583  |
| C | -1.666571 | -0.735539 | -0.283845 |
| H | -1.534288 | -0.620544 | -1.359456 |
| H | -1.450086 | -1.767406 | -0.009176 |
| H | -2.722395 | -0.552349 | -0.056129 |
| O | 1.794402  | -0.002177 | -0.295321 |
| O | 1.096038  | -0.915580 | 0.255227  |

== B3LYP/cc-pVTZ+d harmonic frequencies (cm<sup>-1</sup>) ==

|            |           |           |           |           |           |           |
|------------|-----------|-----------|-----------|-----------|-----------|-----------|
| -1078.3680 | 149.4909  | 175.6899  | 207.7079  | 365.7842  | 420.3225  | 508.3866  |
| 624.2410   | 636.7650  | 894.9108  | 956.1438  | 962.3985  | 1035.8341 | 1062.6771 |
| 1200.0591  | 1287.2995 | 1308.5527 | 1317.7436 | 1406.7636 | 1442.8220 | 1476.7399 |
| 1488.8662  | 1571.5485 | 1599.6502 | 3008.8532 | 3072.6314 | 3093.7832 | 3108.9174 |
| 3161.6502  | 3180.5679 |           |           |           |           |           |

== Thermochemistry energies (hartree) ==

ZPVE = 0.091390 (after scaling by 0.985)  
W1 Ee = -268.917052 (total electronic energy)  
W1 U0 = -268.825662 (Zero-kelvin internal energy)

[ CCSDT-F12a/cc-pVDZ-F12 data ]

CCSD(T)-F12a/cc-pVDZ-F12 Ee = -268.471990 (total electronic energy)

Species 8: Transition state along  $\cdot\text{QOOH} \xrightarrow{\text{TS3}} \text{alkene} + \cdot\text{OOH}$

[ W1 data ]

== B3LYP/cc-pVTZ+d equilibrium geometry (Angstrom) ==

|   |           |           |           |
|---|-----------|-----------|-----------|
| C | -0.717212 | 1.454957  | -0.119912 |
| H | -0.127007 | 2.256686  | 0.300522  |
| H | -1.260894 | 1.658666  | -1.032845 |
| H | 2.434326  | 0.474479  | -0.368593 |
| C | -0.671273 | 0.181161  | 0.408776  |
| H | -0.244311 | 0.065758  | 1.396922  |
| C | -1.649450 | -0.877960 | -0.004827 |
| H | -1.939309 | -0.761269 | -1.049111 |
| H | -1.223661 | -1.870435 | 0.131882  |
| H | -2.552731 | -0.809223 | 0.605864  |
| O | 2.023440  | -0.157469 | 0.238085  |
| O | 0.869209  | -0.537982 | -0.449193 |

== B3LYP/cc-pVTZ+d harmonic frequencies (cm<sup>-1</sup>) ==

|           |           |           |           |           |           |           |
|-----------|-----------|-----------|-----------|-----------|-----------|-----------|
| -502.0347 | 77.2151   | 144.3460  | 199.9043  | 296.8304  | 319.6959  | 417.2000  |
| 440.8612  | 520.7855  | 810.8888  | 895.4051  | 942.9991  | 956.5096  | 1024.0479 |
| 1082.1822 | 1191.7425 | 1268.2948 | 1380.4795 | 1401.4365 | 1434.1805 | 1479.7537 |
| 1495.4993 | 1535.6085 | 3030.7300 | 3087.3208 | 3114.3451 | 3138.0173 | 3159.0095 |
| 3231.4749 | 3721.2202 |           |           |           |           |           |

== Thermochemistry energies (hartree) ==

ZPVE = 0.093795 (after scaling by 0.985)  
W1 Ee = -268.915747 (total electronic energy)  
W1 U0 = -268.821952 (Zero-kelvin internal energy)

[ CCSDT-F12a/cc-pVDZ-F12 data ]

CCSD(T)-F12a/cc-pVDZ-F12 Ee = -268.470670 (total electronic energy)

Species 9: Transition state along  $\cdot\text{QOOH} \xrightarrow{\text{TS4}} \text{cycloether} + \cdot\text{OH}$

[ W1 data ]

== B3LYP/cc-pVTZ+d equilibrium geometry (Angstrom) ==

|   |           |           |           |
|---|-----------|-----------|-----------|
| C | 1.328750  | -1.111615 | -0.010989 |
| H | 1.337250  | -2.018033 | 0.573212  |
| H | 1.817421  | -1.104394 | -0.973549 |
| C | 0.509882  | 0.039305  | 0.410748  |
| H | 0.292989  | 0.046625  | 1.481818  |
| C | 0.866820  | 1.414864  | -0.103616 |
| H | 1.101080  | 1.377743  | -1.167827 |
| H | 0.023219  | 2.088105  | 0.041361  |
| H | 1.727759  | 1.813636  | 0.435997  |
| O | -0.499496 | -0.620103 | -0.314111 |
| O | -2.007577 | 0.169848  | 0.018478  |
| H | -2.475845 | -0.656969 | 0.197195  |

== B3LYP/cc-pVTZ+d harmonic frequencies (cm<sup>-1</sup>) ==

|           |           |           |           |           |           |           |
|-----------|-----------|-----------|-----------|-----------|-----------|-----------|
| -740.6327 | 105.6354  | 150.0838  | 203.3205  | 251.6169  | 350.5830  | 415.1727  |
| 428.6591  | 538.0679  | 769.1875  | 845.9072  | 907.3394  | 927.5228  | 986.1707  |
| 1091.8859 | 1166.2383 | 1198.0876 | 1288.0605 | 1396.4421 | 1422.0378 | 1466.9220 |
| 1487.4752 | 1498.2347 | 3029.8699 | 3033.9197 | 3099.3422 | 3116.4493 | 3160.2450 |
| 3275.2054 | 3782.5489 |           |           |           |           |           |

== Thermochemistry energies (hartree) ==

ZPVE = 0.092884 (after scaling by 0.985)  
W1 Ee = -268.920648 (total electronic energy)  
W1 U0 = -268.827765 (Zero-kelvin internal energy)

[ CCSDT-F12a/cc-pVDZ-F12 data ]

CCSD(T)-F12a/cc-pVDZ-F12 Ee = -268.475958 (total electronic energy)



## Hydrocarbon 3: isobutyl

### Species 1: ·R

[ W1 data ]

== B3LYP/cc-pVTZ+d equilibrium geometry (Angstrom) ==

|   |           |           |           |
|---|-----------|-----------|-----------|
| C | -1.268755 | -0.679206 | 0.101502  |
| C | -0.000003 | 0.059715  | -0.346127 |
| C | -0.000020 | 1.480077  | 0.101187  |
| C | 1.268776  | -0.679160 | 0.101437  |
| H | -2.166973 | -0.166159 | -0.245760 |
| H | -1.316887 | -0.738399 | 1.190674  |
| H | -1.289134 | -1.696251 | -0.293322 |
| H | -0.925833 | 2.030515  | 0.198930  |
| H | 0.925807  | 2.030322  | 0.199678  |
| H | -0.000067 | 0.052067  | -1.449569 |
| H | 1.317008  | -0.738263 | 1.190615  |
| H | 2.166963  | -0.166147 | -0.245950 |
| H | 1.289122  | -1.696240 | -0.293291 |

== B3LYP/cc-pVTZ+d harmonic frequencies (cm<sup>-1</sup>) ==

|           |           |           |           |           |           |           |
|-----------|-----------|-----------|-----------|-----------|-----------|-----------|
| 122.6150  | 228.7966  | 253.5757  | 360.0523  | 373.7450  | 411.5581  | 542.9511  |
| 810.2077  | 905.9566  | 947.5623  | 967.1558  | 982.2091  | 1091.6563 | 1180.4174 |
| 1205.7344 | 1318.8453 | 1328.2073 | 1399.9761 | 1415.1436 | 1467.2682 | 1489.8184 |
| 1493.3116 | 1503.5523 | 1511.3797 | 2893.7842 | 3019.5467 | 3023.4866 | 3080.7408 |
| 3084.6451 | 3085.0696 | 3087.5311 | 3131.4525 | 3230.3489 |           |           |

== Thermochemistry energies (hartree) ==

ZPVE = 0.114328 (after scaling by 0.985)  
W1 Ee = -157.815778 (total electronic energy)  
W1 U0 = -157.701450 (Zero-kelvin internal energy)

[ CCSDT-F12a/cc-pVDZ-F12 data ]

CCSD(T)-F12a/cc-pVDZ-F12 Ee = -157.537629 (total electronic energy)

## Species 2: ROO·

[ W1 data ]

== B3LYP/cc-pVTZ+d equilibrium geometry (Angstrom) ==

|   |           |           |           |
|---|-----------|-----------|-----------|
| C | 1.984858  | -0.899222 | -0.165417 |
| C | 0.742102  | -0.013183 | -0.287945 |
| C | -0.357775 | -0.558890 | 0.614675  |
| C | 1.056898  | 1.451677  | 0.021474  |
| H | 1.768017  | -1.936283 | -0.426410 |
| H | 2.382673  | -0.884290 | 0.852243  |
| H | 2.773082  | -0.545688 | -0.830684 |
| H | 0.365338  | -0.084380 | -1.311772 |
| H | 1.451260  | 1.560560  | 1.034976  |
| H | 0.169099  | 2.077616  | -0.062996 |
| H | 1.807262  | 1.837690  | -0.669400 |
| O | -1.609731 | 0.169672  | 0.452971  |
| O | -2.213630 | -0.153516 | -0.673092 |
| H | -0.116441 | -0.429904 | 1.671111  |
| H | -0.569894 | -1.606855 | 0.407174  |

== B3LYP/cc-pVTZ+d harmonic frequencies (cm<sup>-1</sup>) ==

|           |           |           |           |           |           |           |
|-----------|-----------|-----------|-----------|-----------|-----------|-----------|
| 76.3854   | 109.0916  | 219.3306  | 234.7808  | 250.5676  | 332.9370  | 415.6778  |
| 418.0864  | 564.9671  | 817.4196  | 873.4656  | 937.6780  | 946.8789  | 956.3792  |
| 975.5436  | 1139.3979 | 1152.2855 | 1197.0320 | 1201.2073 | 1290.4553 | 1327.6167 |
| 1376.5753 | 1384.3715 | 1407.0402 | 1427.6585 | 1476.2450 | 1491.5985 | 1496.6487 |
| 1507.2019 | 1512.7898 | 3020.2410 | 3021.6721 | 3030.2480 | 3050.1113 | 3078.3494 |
| 3084.5650 | 3093.0823 | 3103.3409 | 3108.1994 |           |           |           |

== Thermochemistry energies (hartree) ==

ZPVE = 0.125904 (after scaling by 0.985)  
W1 Ee = -308.291652 (total electronic energy)  
W1 U0 = -308.165749 (Zero-kelvin internal energy)

[ CCSDT-F12a/cc-pVDZ-F12 data ]

CCSD(T)-F12a/cc-pVDZ-F12 Ee = -307.777334 (total electronic energy)

### Species 3: ·QOOH

[ W1 data ]

== B3LYP/cc-pVTZ+d equilibrium geometry (Angstrom) ==

|   |           |           |           |
|---|-----------|-----------|-----------|
| C | 1.747753  | -1.148068 | -0.170438 |
| C | 0.828672  | -0.004333 | 0.084194  |
| C | -0.384257 | -0.177993 | 0.931730  |
| C | 1.258994  | 1.375988  | -0.282916 |
| H | 1.242046  | -2.107979 | -0.061594 |
| H | 2.603225  | -1.152270 | 0.522119  |
| H | 2.178246  | -1.100358 | -1.175375 |
| H | 2.047683  | 1.744907  | 0.390221  |
| H | 0.431620  | 2.083978  | -0.230015 |
| H | 1.680466  | 1.414577  | -1.291300 |
| O | -1.580275 | 0.388399  | 0.371828  |
| O | -1.970741 | -0.435894 | -0.756588 |
| H | -0.307879 | 0.380120  | 1.875954  |
| H | -0.563479 | -1.228642 | 1.169149  |
| H | -1.610767 | 0.072063  | -1.496499 |

== B3LYP/cc-pVTZ+d harmonic frequencies (cm<sup>-1</sup>) ==

|           |           |           |           |           |           |           |
|-----------|-----------|-----------|-----------|-----------|-----------|-----------|
| 33.4358   | 70.5341   | 104.9496  | 129.9819  | 204.1928  | 235.8002  | 310.0464  |
| 367.7000  | 400.7589  | 551.2879  | 774.8480  | 858.6426  | 939.9628  | 942.3565  |
| 972.3378  | 1000.4202 | 1005.5271 | 1051.9266 | 1239.0216 | 1293.7248 | 1307.7913 |
| 1360.1532 | 1376.1121 | 1400.4718 | 1416.3914 | 1460.1408 | 1469.8108 | 1475.6848 |
| 1485.6146 | 1496.4919 | 2940.1077 | 2944.7109 | 2963.5689 | 3017.8420 | 3027.1571 |
| 3053.2430 | 3084.9746 | 3089.4938 | 3746.8587 |           |           |           |

== Thermochemistry energies (hartree) ==

ZPVE = 0.122531 (after scaling by 0.985)  
W1 Ee = -308.270527 (total electronic energy)  
W1 U0 = -308.147996 (Zero-kelvin internal energy)

[ CCSDT-F12a/cc-pVDZ-F12 data ]

CCSD(T)-F12a/cc-pVDZ-F12 Ee = -307.755469 (total electronic energy)

## Species 4: *cy*-ether

[ W1 data ]

== B3LYP/cc-pVTZ+d equilibrium geometry (Angstrom) ==

|   |           |           |           |
|---|-----------|-----------|-----------|
| C | -0.930698 | -1.279992 | -0.049036 |
| C | -0.131144 | 0.000000  | -0.054913 |
| C | 1.237579  | -0.000000 | -0.582716 |
| C | -0.930698 | 1.279992  | -0.049036 |
| H | -0.272060 | -2.146381 | -0.014050 |
| H | -1.555426 | -1.351676 | -0.941587 |
| H | -1.587027 | -1.314167 | 0.822839  |
| H | -1.555426 | 1.351676  | -0.941587 |
| H | -0.272060 | 2.146381  | -0.014050 |
| H | -1.587027 | 1.314167  | 0.822839  |
| O | 1.004512  | -0.000000 | 0.830447  |
| H | 1.661345  | 0.916464  | -0.981890 |
| H | 1.661345  | -0.916464 | -0.981890 |

== B3LYP/cc-pVTZ+d harmonic frequencies (cm<sup>-1</sup>) ==

|           |           |           |           |           |           |           |
|-----------|-----------|-----------|-----------|-----------|-----------|-----------|
| 182.2996  | 218.0260  | 356.0528  | 360.6338  | 410.6438  | 412.8239  | 700.0132  |
| 807.9259  | 908.0013  | 923.8222  | 959.9394  | 1020.4768 | 1074.6552 | 1131.2834 |
| 1150.3799 | 1172.9890 | 1284.2192 | 1391.2651 | 1413.0982 | 1423.4775 | 1476.3986 |
| 1488.0208 | 1495.2216 | 1507.0339 | 1534.6608 | 3024.8752 | 3030.1894 | 3074.6200 |
| 3079.8161 | 3084.9296 | 3109.1838 | 3111.0373 | 3155.6317 |           |           |

== Thermochemistry energies (hartree) ==

ZPVE = 0.111018 (after scaling by 0.985)  
W1 Ee = -232.515736 (total electronic energy)  
W1 U0 = -232.404717 (Zero-kelvin internal energy)

[ CCSDT-F12a/cc-pVDZ-F12 data ]

CCSD(T)-F12a/cc-pVDZ-F12 Ee = -232.119425 (total electronic energy)

## Species 5: alkene

[ W1 data ]

== B3LYP/cc-pVTZ+d equilibrium geometry (Angstrom) ==

|   |           |           |           |
|---|-----------|-----------|-----------|
| C | -1.272636 | -0.676750 | 0.000001  |
| C | -0.000007 | 0.124048  | 0.000004  |
| C | -0.000110 | 1.454215  | -0.000002 |
| C | 1.272735  | -0.676582 | 0.000001  |
| H | -2.153991 | -0.037135 | 0.000036  |
| H | -1.322215 | -1.329609 | 0.876239  |
| H | -1.322239 | -1.329555 | -0.876275 |
| H | 1.322437  | -1.329441 | 0.876233  |
| H | 2.154004  | -0.036844 | 0.000024  |
| H | 1.322420  | -1.329365 | -0.876288 |
| H | -0.922249 | 2.021111  | -0.000001 |
| H | 0.921944  | 2.021249  | 0.000008  |

== B3LYP/cc-pVTZ+d harmonic frequencies (cm<sup>-1</sup>) ==

|           |           |           |           |           |           |           |
|-----------|-----------|-----------|-----------|-----------|-----------|-----------|
| 172.8162  | 210.8870  | 381.2455  | 440.1560  | 442.7760  | 707.2396  | 814.6234  |
| 925.1425  | 961.6709  | 988.4662  | 1023.0717 | 1086.4536 | 1108.9179 | 1297.4171 |
| 1410.9842 | 1416.3024 | 1445.7769 | 1472.4631 | 1485.0281 | 1489.9416 | 1503.6531 |
| 1717.8689 | 3007.7226 | 3013.3153 | 3048.1450 | 3050.8984 | 3101.8017 | 3103.4482 |
| 3130.2230 | 3207.6813 |           |           |           |           |           |

== Thermochemistry energies (hartree) ==

ZPVE = 0.105840 (after scaling by 0.985)  
W1 Ee = -157.260142 (total electronic energy)  
W1 U0 = -157.154302 (Zero-kelvin internal energy)

[ CCSDT-F12a/cc-pVDZ-F12 data ]

CCSD(T)-F12a/cc-pVDZ-F12 Ee = -156.981896 (total electronic energy)

Species 6: Transition state along  $\text{ROO} \cdot \xrightarrow{\text{TS1}} \cdot\text{QOOH}$

[ W1 data ]

== B3LYP/cc-pVTZ+d equilibrium geometry (Angstrom) ==

|   |           |           |           |
|---|-----------|-----------|-----------|
| C | 1.729982  | -1.026856 | -0.142334 |
| C | 0.632718  | -0.006702 | -0.035631 |
| C | -0.496792 | -0.299777 | 0.966070  |
| C | 1.050402  | 1.437910  | -0.120253 |
| H | 1.333278  | -2.039470 | -0.223676 |
| H | 2.376129  | -0.998500 | 0.744486  |
| H | 2.369501  | -0.832714 | -1.004641 |
| H | -0.304917 | -0.199741 | -0.981413 |
| H | 1.667877  | 1.706944  | 0.746098  |
| H | 0.184029  | 2.098691  | -0.128733 |
| H | 1.646542  | 1.629578  | -1.013186 |
| O | -1.673057 | 0.198285  | 0.336461  |
| O | -1.550679 | -0.303552 | -0.986789 |
| H | -0.402736 | 0.226914  | 1.918965  |
| H | -0.577677 | -1.377008 | 1.137599  |

== B3LYP/cc-pVTZ+d harmonic frequencies (cm<sup>-1</sup>) ==

|            |           |           |           |           |           |           |
|------------|-----------|-----------|-----------|-----------|-----------|-----------|
| -2074.1999 | 131.0424  | 187.6082  | 220.8176  | 259.6493  | 282.2091  | 363.7549  |
| 401.9509   | 549.7213  | 660.9296  | 815.6935  | 899.6138  | 933.3573  | 948.1618  |
| 968.9846   | 978.9501  | 1014.4557 | 1127.7462 | 1138.4629 | 1227.3442 | 1252.0236 |
| 1282.2910  | 1351.4149 | 1400.4985 | 1414.2542 | 1471.4576 | 1477.7350 | 1491.3574 |
| 1491.6597  | 1499.8779 | 1720.4371 | 2982.0842 | 2987.2194 | 3010.8712 | 3056.8370 |
| 3065.2979  | 3066.2637 | 3095.5233 | 3106.0826 |           |           |           |

== Thermochemistry energies (hartree) ==

ZPVE = 0.119680 (after scaling by 0.985)  
W1 Ee = -308.237025 (total electronic energy)  
W1 U0 = -308.117344 (Zero-kelvin internal energy)

[ CCSDT-F12a/cc-pVDZ-F12 data ]

CCSD(T)-F12a/cc-pVDZ-F12 Ee = -307.722677 (total electronic energy)

Species 7: Transition state along  $\text{ROO}\cdot \xrightarrow{\text{TS}_2} \text{alkene} + \cdot\text{OOH}$

[ W1 data ]

== B3LYP/cc-pVTZ+d equilibrium geometry (Angstrom) ==

|   |           |           |           |
|---|-----------|-----------|-----------|
| C | -0.103419 | 0.000576  | 1.260337  |
| H | -0.371480 | -0.915374 | 1.766499  |
| H | -0.371297 | 0.917222  | 1.765367  |
| C | 0.704754  | 0.000003  | 0.129033  |
| H | -0.335511 | 0.000470  | -0.666622 |
| C | 1.428132  | -1.286073 | -0.258379 |
| H | 1.616142  | -1.325179 | -1.332347 |
| H | 2.396191  | -1.352011 | 0.244308  |
| H | 0.847036  | -2.167747 | 0.012042  |
| C | 1.429550  | 1.285173  | -0.258734 |
| H | 1.617564  | 1.323813  | -1.332720 |
| H | 0.849467  | 2.167571  | 0.011506  |
| H | 2.397693  | 1.350129  | 0.243910  |
| O | -2.052038 | -0.000121 | 0.225095  |
| O | -1.622950 | 0.000500  | -0.968280 |

== B3LYP/cc-pVTZ+d harmonic frequencies (cm<sup>-1</sup>) ==

|           |           |           |           |           |           |           |
|-----------|-----------|-----------|-----------|-----------|-----------|-----------|
| -920.2987 | 122.2922  | 179.9021  | 192.5073  | 208.2988  | 257.9623  | 366.5070  |
| 372.9122  | 416.7113  | 546.4520  | 683.1347  | 756.3789  | 843.0233  | 943.4251  |
| 972.8798  | 989.9748  | 1017.4941 | 1074.9199 | 1132.9713 | 1209.6971 | 1288.8704 |
| 1327.1116 | 1408.8980 | 1414.5012 | 1424.5769 | 1483.1828 | 1495.0807 | 1498.6456 |
| 1508.6753 | 1568.5048 | 1588.1585 | 3019.0304 | 3022.3352 | 3073.2892 | 3074.7033 |
| 3096.5168 | 3097.7930 | 3153.4326 | 3239.1244 |           |           |           |

== Thermochemistry energies (hartree) ==

ZPVE = 0.119088 (after scaling by 0.985)  
W1 Ee = -308.234418 (total electronic energy)  
W1 U0 = -308.115330 (Zero-kelvin internal energy)

[ CCSDT-F12a/cc-pVDZ-F12 data ]

CCSD(T)-F12a/cc-pVDZ-F12 Ee = -307.720203 (total electronic energy)

Species 8: Transition state along  $\cdot\text{QOOH} \xrightarrow{\text{TS}_3} \text{alkene} + \cdot\text{OOH}$

[ W1 data ]

== B3LYP/cc-pVTZ+d equilibrium geometry (Angstrom) ==

|   |           |           |           |
|---|-----------|-----------|-----------|
| C | 0.070187  | -0.537266 | 0.995685  |
| H | 0.611884  | 0.083767  | 1.694306  |
| H | 0.054349  | -1.594035 | 1.225013  |
| C | -0.951568 | 0.006922  | 0.245689  |
| H | 1.951756  | 0.770387  | -1.193525 |
| C | -1.089518 | 1.487428  | 0.083045  |
| H | -0.922252 | 1.785568  | -0.959046 |
| H | -2.103726 | 1.817719  | 0.329673  |
| H | -0.386937 | 2.035112  | 0.708192  |
| C | -1.869988 | -0.854459 | -0.562024 |
| H | -1.723492 | -0.687467 | -1.634888 |
| H | -1.715286 | -1.913818 | -0.364020 |
| H | -2.917461 | -0.613472 | -0.355460 |
| O | 1.550311  | -0.751100 | -0.185898 |
| O | 2.224249  | 0.463661  | -0.317178 |

== B3LYP/cc-pVTZ+d harmonic frequencies (cm<sup>-1</sup>) ==

|           |           |           |           |           |           |           |
|-----------|-----------|-----------|-----------|-----------|-----------|-----------|
| -499.1799 | 27.6767   | 97.4718   | 120.9997  | 126.7134  | 173.2424  | 293.4801  |
| 375.2122  | 418.0195  | 440.4780  | 456.4588  | 800.3667  | 875.0434  | 936.6090  |
| 964.4024  | 982.8232  | 1031.2558 | 1057.0041 | 1070.4450 | 1078.0214 | 1310.7476 |
| 1377.1609 | 1397.1779 | 1407.4586 | 1415.2549 | 1466.4683 | 1477.5072 | 1483.2692 |
| 1498.4608 | 1555.7415 | 2987.5213 | 2998.0116 | 3025.3999 | 3032.5624 | 3104.3266 |
| 3109.1281 | 3139.4021 | 3223.2736 | 3714.8010 |           |           |           |

== Thermochemistry energies (hartree) ==

ZPVE = 0.121287 (after scaling by 0.985)  
W1 Ee = -308.245487 (total electronic energy)  
W1 U0 = -308.124200 (Zero-kelvin internal energy)

[ CCSDT-F12a/cc-pVDZ-F12 data ]

CCSD(T)-F12a/cc-pVDZ-F12 Ee = -307.730694 (total electronic energy)



Species 9: Transition state along  $\cdot\text{QOOH} \xrightarrow{\text{TS4}} \text{cycloether} + \cdot\text{OH}$

[ W1 data ]

== B3LYP/cc-pVTZ+d equilibrium geometry (Angstrom) ==

|   |           |           |           |
|---|-----------|-----------|-----------|
| C | 0.365522  | -0.041112 | 0.874498  |
| H | 0.608783  | 0.842364  | 1.470600  |
| H | 0.566038  | -0.954671 | 1.440864  |
| C | -0.933526 | 0.002640  | 0.175068  |
| H | 2.843522  | 0.598261  | -0.854025 |
| C | -1.559262 | 1.308674  | -0.158355 |
| H | -1.916489 | 1.334855  | -1.190242 |
| H | -2.436990 | 1.476166  | 0.480001  |
| H | -0.870538 | 2.136541  | -0.003271 |
| C | -1.611276 | -1.259903 | -0.218232 |
| H | -1.992082 | -1.214122 | -1.240760 |
| H | -0.946062 | -2.116033 | -0.128815 |
| H | -2.478840 | -1.436138 | 0.431844  |
| O | 0.948000  | -0.035001 | -0.394531 |
| O | 2.683739  | -0.056126 | -0.160977 |

== B3LYP/cc-pVTZ+d harmonic frequencies (cm<sup>-1</sup>) ==

|           |           |           |           |           |           |           |
|-----------|-----------|-----------|-----------|-----------|-----------|-----------|
| -651.7600 | 78.8946   | 96.5472   | 111.5576  | 124.7809  | 191.1735  | 203.4085  |
| 282.9919  | 388.0618  | 402.8686  | 434.3460  | 766.4297  | 923.0601  | 935.8733  |
| 980.8702  | 992.8149  | 1017.6637 | 1054.6418 | 1098.7156 | 1176.3438 | 1287.3300 |
| 1315.7163 | 1365.3611 | 1403.7770 | 1411.1883 | 1459.2924 | 1475.4304 | 1477.9044 |
| 1499.0488 | 1535.7380 | 2976.7452 | 2981.8922 | 3004.2764 | 3047.0586 | 3050.8414 |
| 3051.2920 | 3116.2985 | 3118.9940 | 3785.1107 |           |           |           |

== Thermochemistry energies (hartree) ==

ZPVE = 0.120333 (after scaling by 0.985)  
W1 Ee = -308.251537 (total electronic energy)  
W1 U0 = -308.131204 (Zero-kelvin internal energy)

[ CCSDT-F12a/cc-pVDZ-F12 data ]

CCSD(T)-F12a/cc-pVDZ-F12 Ee = -307.737022 (total electronic energy)

# Hydrocarbon 4: tertbutyl

## Species 1: ·R

[ W1 data ]

== B3LYP/cc-pVTZ+d equilibrium geometry (Angstrom) ==

|   |           |           |           |
|---|-----------|-----------|-----------|
| C | 0.587488  | -1.361150 | 0.014532  |
| C | -0.000027 | -0.000011 | -0.148270 |
| C | -1.472550 | 0.171814  | 0.014623  |
| C | 0.885071  | 1.189347  | 0.014314  |
| H | 1.581371  | -1.430125 | -0.433166 |
| H | -0.043758 | -2.131690 | -0.433583 |
| H | 0.705018  | -1.634109 | 1.076509  |
| H | -1.824088 | 1.104079  | -0.432927 |
| H | -1.767707 | 0.205859  | 1.076623  |
| H | -2.029355 | -0.654072 | -0.433583 |
| H | 1.867952  | 1.027801  | -0.433852 |
| H | 1.062775  | 1.427714  | 1.076254  |
| H | 0.447901  | 2.084541  | -0.433467 |

== B3LYP/cc-pVTZ+d harmonic frequencies (cm<sup>-1</sup>) ==

|           |           |           |           |           |           |           |
|-----------|-----------|-----------|-----------|-----------|-----------|-----------|
| 132.9968  | 133.2369  | 134.8186  | 262.1915  | 379.8252  | 379.9802  | 757.7653  |
| 937.9257  | 938.0411  | 972.6887  | 1008.0016 | 1008.0918 | 1097.1729 | 1294.2784 |
| 1294.3488 | 1397.7567 | 1397.8094 | 1425.3273 | 1468.5504 | 1471.2244 | 1471.3241 |
| 1488.9202 | 1491.8940 | 1491.9784 | 2914.1698 | 2914.1873 | 2922.4951 | 3028.5368 |
| 3028.6184 | 3031.6386 | 3070.4209 | 3074.9860 | 3075.0498 |           |           |

== Thermochemistry energies (hartree) ==

ZPVE = 0.114211 (after scaling by 0.985)  
W1 Ee = -157.823966 (total electronic energy)  
W1 U0 = -157.709756 (Zero-kelvin internal energy)

[ CCSDT-F12a/cc-pVDZ-F12 data ]

CCSD(T)-F12a/cc-pVDZ-F12 Ee = -157.545445 (total electronic energy)

## Species 2: ROO·

[ W1 data ]

== B3LYP/cc-pVTZ+d equilibrium geometry (Angstrom) ==

|   |           |           |           |
|---|-----------|-----------|-----------|
| C | -0.667957 | 0.670834  | 1.265796  |
| C | 0.113820  | 0.350403  | -0.000000 |
| C | 1.503478  | 0.968774  | 0.000000  |
| C | -0.667957 | 0.670834  | -1.265796 |
| H | -0.887045 | 1.738171  | 1.304642  |
| H | -0.093255 | 0.405232  | 2.153117  |
| H | -1.607746 | 0.122322  | 1.280426  |
| H | 1.423454  | 2.055754  | 0.000000  |
| H | 2.062996  | 0.666024  | -0.884767 |
| H | 2.062996  | 0.666024  | 0.884767  |
| O | 0.410249  | -1.118607 | 0.000000  |
| H | -0.093255 | 0.405232  | -2.153117 |
| H | -0.887045 | 1.738171  | -1.304642 |
| H | -1.607746 | 0.122322  | -1.280426 |
| O | -0.667957 | -1.866931 | 0.000000  |

== B3LYP/cc-pVTZ+d harmonic frequencies (cm<sup>-1</sup>) ==

|           |           |           |           |           |           |           |
|-----------|-----------|-----------|-----------|-----------|-----------|-----------|
| 123.2015  | 180.1497  | 232.4116  | 243.0958  | 269.2671  | 331.3690  | 360.0768  |
| 402.8449  | 437.4422  | 541.8098  | 728.8411  | 799.9479  | 929.0682  | 931.3197  |
| 971.7406  | 1041.0430 | 1053.5585 | 1169.7132 | 1219.4434 | 1262.0575 | 1292.8167 |
| 1399.5582 | 1402.8135 | 1427.7105 | 1471.6543 | 1489.4173 | 1490.9813 | 1497.9442 |
| 1498.9160 | 1522.0499 | 3038.7158 | 3039.1648 | 3045.7611 | 3102.2559 | 3104.1263 |
| 3110.2291 | 3111.6928 | 3120.7871 | 3124.6407 |           |           |           |

== Thermochemistry energies (hartree) ==

ZPVE = 0.124586 (after scaling by 0.985)  
W1 Ee = -308.301806 (total electronic energy)  
W1 U0 = -308.177220 (Zero-kelvin internal energy)

[ CCSDT-F12a/cc-pVDZ-F12 data ]

CCSD(T)-F12a/cc-pVDZ-F12 Ee = -307.787529 (total electronic energy)

### Species 3: ·QOOH

[ W1 data ]

== B3LYP/cc-pVTZ+d equilibrium geometry (Angstrom) ==

|   |           |           |           |
|---|-----------|-----------|-----------|
| C | 0.299981  | -0.417790 | 1.502845  |
| C | 0.398461  | 0.017356  | 0.081051  |
| C | 1.599862  | -0.630154 | -0.616530 |
| C | 0.416065  | 1.535827  | -0.063131 |
| H | 0.094122  | 0.282969  | 2.298536  |
| H | 0.376328  | -1.469121 | 1.746016  |
| H | 2.525261  | -0.270029 | -0.168641 |
| H | 1.599808  | -0.375432 | -1.676334 |
| H | 1.564555  | -1.714624 | -0.518454 |
| O | -0.711641 | -0.545907 | -0.691519 |
| H | 0.478580  | 1.814196  | -1.114656 |
| H | 1.276854  | 1.953596  | 0.460649  |
| H | -0.489456 | 1.969532  | 0.356241  |
| O | -1.968222 | -0.013991 | -0.203604 |
| H | -2.273367 | -0.743339 | 0.352216  |

== B3LYP/cc-pVTZ+d harmonic frequencies (cm<sup>-1</sup>) ==

|           |           |           |           |           |           |           |
|-----------|-----------|-----------|-----------|-----------|-----------|-----------|
| 109.2194  | 141.3243  | 206.9200  | 240.7980  | 252.7215  | 258.1678  | 328.1161  |
| 353.2250  | 402.1434  | 452.2221  | 498.9845  | 601.4172  | 762.0479  | 825.1127  |
| 913.5871  | 932.7689  | 956.2792  | 982.0867  | 1036.1685 | 1152.8553 | 1261.4030 |
| 1274.9492 | 1364.9961 | 1394.6598 | 1411.1307 | 1460.2112 | 1477.8673 | 1488.4401 |
| 1494.0838 | 1512.1049 | 3037.6502 | 3042.2023 | 3102.6808 | 3109.4591 | 3113.6103 |
| 3122.9679 | 3136.1293 | 3243.2977 | 3753.6479 |           |           |           |

== Thermochemistry energies (hartree) ==

ZPVE = 0.121642 (after scaling by 0.985)  
W1 Ee = -308.270613 (total electronic energy)  
W1 U0 = -308.148971 (Zero-kelvin internal energy)

[ CCSDT-F12a/cc-pVDZ-F12 data ]

CCSD(T)-F12a/cc-pVDZ-F12 Ee = -307.756034 (total electronic energy)

## Species 4: *cy*-ether

[ W1 data ]

== B3LYP/cc-pVTZ+d equilibrium geometry (Angstrom) ==

|   |           |           |           |
|---|-----------|-----------|-----------|
| C | -0.930698 | -1.279992 | -0.049036 |
| C | -0.131144 | 0.000000  | -0.054913 |
| C | 1.237579  | -0.000000 | -0.582716 |
| C | -0.930698 | 1.279992  | -0.049036 |
| H | -0.272060 | -2.146381 | -0.014050 |
| H | -1.555426 | -1.351676 | -0.941587 |
| H | -1.587027 | -1.314167 | 0.822839  |
| H | -1.555426 | 1.351676  | -0.941587 |
| H | -0.272060 | 2.146381  | -0.014050 |
| H | -1.587027 | 1.314167  | 0.822839  |
| O | 1.004512  | -0.000000 | 0.830447  |
| H | 1.661345  | 0.916464  | -0.981890 |
| H | 1.661345  | -0.916464 | -0.981890 |

== B3LYP/cc-pVTZ+d harmonic frequencies (cm<sup>-1</sup>) ==

|           |           |           |           |           |           |           |
|-----------|-----------|-----------|-----------|-----------|-----------|-----------|
| 182.2996  | 218.0260  | 356.0528  | 360.6338  | 410.6438  | 412.8239  | 700.0132  |
| 807.9259  | 908.0013  | 923.8222  | 959.9394  | 1020.4768 | 1074.6552 | 1131.2834 |
| 1150.3799 | 1172.9890 | 1284.2192 | 1391.2651 | 1413.0982 | 1423.4775 | 1476.3986 |
| 1488.0208 | 1495.2216 | 1507.0339 | 1534.6608 | 3024.8752 | 3030.1894 | 3074.6200 |
| 3079.8161 | 3084.9296 | 3109.1838 | 3111.0373 | 3155.6317 |           |           |

== Thermochemistry energies (hartree) ==

ZPVE = 0.111018 (after scaling by 0.985)  
W1 Ee = -232.515736 (total electronic energy)  
W1 U0 = -232.404717 (Zero-kelvin internal energy)

[ CCSDT-F12a/cc-pVDZ-F12 data ]

CCSD(T)-F12a/cc-pVDZ-F12 Ee = -232.119425 (total electronic energy)

## Species 5: alkene

[ W1 data ]

== B3LYP/cc-pVTZ+d equilibrium geometry (Angstrom) ==

|   |           |           |           |
|---|-----------|-----------|-----------|
| C | -1.272636 | -0.676750 | 0.000001  |
| C | -0.000007 | 0.124048  | 0.000004  |
| C | -0.000110 | 1.454215  | -0.000002 |
| C | 1.272735  | -0.676582 | 0.000001  |
| H | -2.153991 | -0.037135 | 0.000036  |
| H | -1.322215 | -1.329609 | 0.876239  |
| H | -1.322239 | -1.329555 | -0.876275 |
| H | 1.322437  | -1.329441 | 0.876233  |
| H | 2.154004  | -0.036844 | 0.000024  |
| H | 1.322420  | -1.329365 | -0.876288 |
| H | -0.922249 | 2.021111  | -0.000001 |
| H | 0.921944  | 2.021249  | 0.000008  |

== B3LYP/cc-pVTZ+d harmonic frequencies (cm<sup>-1</sup>) ==

|           |           |           |           |           |           |           |
|-----------|-----------|-----------|-----------|-----------|-----------|-----------|
| 172.8162  | 210.8870  | 381.2455  | 440.1560  | 442.7760  | 707.2396  | 814.6234  |
| 925.1425  | 961.6709  | 988.4662  | 1023.0717 | 1086.4536 | 1108.9179 | 1297.4171 |
| 1410.9842 | 1416.3024 | 1445.7769 | 1472.4631 | 1485.0281 | 1489.9416 | 1503.6531 |
| 1717.8689 | 3007.7226 | 3013.3153 | 3048.1450 | 3050.8984 | 3101.8017 | 3103.4482 |
| 3130.2230 | 3207.6813 |           |           |           |           |           |

== Thermochemistry energies (hartree) ==

ZPVE = 0.105840 (after scaling by 0.985)  
W1 Ee = -157.260142 (total electronic energy)  
W1 U0 = -157.154302 (Zero-kelvin internal energy)

[ CCSDT-F12a/cc-pVDZ-F12 data ]

CCSD(T)-F12a/cc-pVDZ-F12 Ee = -156.981896 (total electronic energy)

Species 6: Transition state along  $\text{ROO} \cdot \xrightarrow{\text{TS1}} \cdot\text{QOOH}$

[ W1 data ]

== B3LYP/cc-pVTZ+d equilibrium geometry (Angstrom) ==

|   |           |           |           |
|---|-----------|-----------|-----------|
| C | 0.374528  | 0.007943  | 0.041163  |
| C | -0.239334 | -0.489943 | 1.355864  |
| H | -1.472485 | -0.247647 | 0.809877  |
| H | -0.216368 | -1.563877 | 1.518701  |
| H | -0.084712 | 0.101532  | 2.251682  |
| C | 0.584397  | 1.520086  | 0.059182  |
| H | 1.318278  | 1.799473  | 0.816397  |
| H | 0.945472  | 1.857845  | -0.911837 |
| H | -0.352010 | 2.030992  | 0.276632  |
| C | 1.629428  | -0.748555 | -0.369766 |
| H | 1.437974  | -1.819892 | -0.408153 |
| H | 1.966037  | -0.419234 | -1.353630 |
| H | 2.432224  | -0.560296 | 0.343716  |
| O | -0.642771 | -0.355494 | -0.933256 |
| O | -1.865795 | -0.009016 | -0.299499 |

== B3LYP/cc-pVTZ+d harmonic frequencies (cm<sup>-1</sup>) ==

|            |           |           |           |           |           |           |
|------------|-----------|-----------|-----------|-----------|-----------|-----------|
| -2232.9375 | 188.9270  | 195.0793  | 238.4295  | 299.3179  | 339.7262  | 392.5465  |
| 406.8249   | 507.8713  | 569.9865  | 639.6141  | 782.1498  | 833.1641  | 905.6383  |
| 924.3858   | 946.5922  | 972.7926  | 1017.4376 | 1042.7846 | 1108.3458 | 1173.1397 |
| 1248.6215  | 1270.3820 | 1399.7768 | 1414.8222 | 1455.1113 | 1479.1162 | 1488.0157 |
| 1496.2509  | 1509.6754 | 1710.7843 | 3034.9281 | 3040.1094 | 3094.7877 | 3098.0676 |
| 3104.1973  | 3113.5280 | 3118.9170 | 3184.8277 |           |           |           |

== Thermochemistry energies (hartree) ==

ZPVE = 0.118364 (after scaling by 0.985)  
W1 Ee = -308.237692 (total electronic energy)  
W1 U0 = -308.119329 (Zero-kelvin internal energy)

[ CCSDT-F12a/cc-pVDZ-F12 data ]

CCSD(T)-F12a/cc-pVDZ-F12 Ee = -307.723601 (total electronic energy)

Species 7: Transition state along  $\text{ROO}\cdot \xrightarrow{\text{TS}_2} \text{alkene} + \cdot\text{OOH}$

[ W1 data ]

== B3LYP/cc-pVTZ+d equilibrium geometry (Angstrom) ==

|   |           |           |           |
|---|-----------|-----------|-----------|
| C | 0.721059  | -0.000018 | 0.227831  |
| C | 0.072724  | -0.000113 | 1.458531  |
| H | -1.179341 | -0.000070 | 0.970425  |
| H | 0.082107  | -0.915377 | 2.042335  |
| H | 0.082110  | 0.915059  | 2.042482  |
| C | 1.209909  | 1.274063  | -0.387021 |
| H | 2.276798  | 1.395786  | -0.167934 |
| H | 1.100321  | 1.262699  | -1.471143 |
| H | 0.686663  | 2.141889  | 0.010713  |
| C | 1.209909  | -1.274006 | -0.387214 |
| H | 0.686638  | -2.141888 | 0.010365  |
| H | 1.100352  | -1.262464 | -1.471336 |
| H | 2.276790  | -1.395780 | -0.168114 |
| O | -1.246798 | 0.000084  | -0.950567 |
| O | -2.052458 | -0.000011 | 0.041747  |

== B3LYP/cc-pVTZ+d harmonic frequencies (cm<sup>-1</sup>) ==

|            |           |           |           |           |           |           |
|------------|-----------|-----------|-----------|-----------|-----------|-----------|
| -1066.4599 | 129.5392  | 165.2107  | 194.0853  | 201.8582  | 204.6439  | 366.7876  |
| 432.4375   | 433.2686  | 534.7269  | 633.6676  | 652.0179  | 816.9233  | 939.5041  |
| 989.8160   | 1022.0894 | 1024.2148 | 1072.2748 | 1100.5524 | 1286.0098 | 1305.2299 |
| 1326.8529  | 1409.7241 | 1410.8391 | 1425.9692 | 1468.9390 | 1480.3136 | 1484.5351 |
| 1499.1572  | 1569.9244 | 1598.6130 | 3003.2904 | 3008.1821 | 3073.4676 | 3076.5548 |
| 3091.6281  | 3114.7785 | 3117.1111 | 3168.6948 |           |           |           |

== Thermochemistry energies (hartree) ==

ZPVE = 0.118558 (after scaling by 0.985)  
W1 Ee = -308.247514 (total electronic energy)  
W1 U0 = -308.128956 (Zero-kelvin internal energy)

[ CCSDT-F12a/cc-pVDZ-F12 data ]

CCSD(T)-F12a/cc-pVDZ-F12 Ee = -307.733017 (total electronic energy)



Species 8: Transition state along  $\cdot\text{QOOH} \xrightarrow{\text{TS}_3} \text{alkene} + \cdot\text{OOH}$

[ W1 data ]

== B3LYP/cc-pVTZ+d equilibrium geometry (Angstrom) ==

|   |           |           |           |
|---|-----------|-----------|-----------|
| C | 0.659424  | 0.111180  | 0.154318  |
| C | 0.629958  | -0.166234 | 1.513604  |
| H | -2.220744 | 0.547831  | -0.683078 |
| H | 1.001960  | -1.106607 | 1.894172  |
| H | 0.111527  | 0.483571  | 2.204284  |
| C | 0.372785  | 1.513754  | -0.313028 |
| H | 1.269106  | 2.130950  | -0.215509 |
| H | 0.080859  | 1.524197  | -1.363802 |
| H | -0.413588 | 1.976165  | 0.282474  |
| C | 1.553931  | -0.709594 | -0.737671 |
| H | 1.620258  | -1.738368 | -0.387526 |
| H | 1.179707  | -0.715055 | -1.760570 |
| H | 2.561384  | -0.286405 | -0.747566 |
| O | -0.945723 | -0.789945 | -0.372351 |
| O | -2.115159 | -0.123919 | 0.006574  |

== B3LYP/cc-pVTZ+d harmonic frequencies (cm<sup>-1</sup>) ==

|           |           |           |           |           |           |           |
|-----------|-----------|-----------|-----------|-----------|-----------|-----------|
| -487.7669 | 88.9942   | 151.7565  | 187.8326  | 203.4678  | 238.7849  | 313.5023  |
| 383.0518  | 393.9403  | 436.9883  | 445.0092  | 514.1904  | 794.1423  | 798.9923  |
| 937.3273  | 945.8456  | 975.7839  | 1020.0629 | 1059.3166 | 1077.9920 | 1303.4883 |
| 1375.2400 | 1388.7153 | 1405.2746 | 1419.3570 | 1477.5224 | 1487.4114 | 1488.9793 |
| 1508.0398 | 1528.5590 | 3025.6914 | 3030.9291 | 3078.6432 | 3090.0985 | 3106.6231 |
| 3117.0108 | 3145.0795 | 3238.2692 | 3701.7344 |           |           |           |

== Thermochemistry energies (hartree) ==

ZPVE = 0.120915 (after scaling by 0.985)  
W1 Ee = -308.243556 (total electronic energy)  
W1 U0 = -308.122642 (Zero-kelvin internal energy)

[ CCSDT-F12a/cc-pVDZ-F12 data ]

CCSD(T)-F12a/cc-pVDZ-F12 Ee = -307.729235 (total electronic energy)

Species 9: Transition state along  $\cdot\text{QOOH} \xrightarrow{\text{TS4}} \text{cycloether} + \cdot\text{OH}$

[ W1 data ]

== B3LYP/cc-pVTZ+d equilibrium geometry (Angstrom) ==

|   |           |           |           |
|---|-----------|-----------|-----------|
| C | 0.487789  | 0.043724  | 0.026149  |
| C | 1.265037  | -1.196235 | -0.199899 |
| H | -2.492390 | -0.559124 | 0.456318  |
| H | 1.565088  | -1.476775 | -1.197744 |
| H | 1.427753  | -1.889516 | 0.610898  |
| C | 0.479072  | 0.552137  | 1.459441  |
| H | 1.414881  | 1.060642  | 1.694989  |
| H | -0.343744 | 1.252754  | 1.590493  |
| H | 0.343867  | -0.273327 | 2.158369  |
| C | 0.681171  | 1.144900  | -1.003846 |
| H | 0.674859  | 0.729836  | -2.011003 |
| H | -0.133241 | 1.863715  | -0.925230 |
| H | 1.625262  | 1.666943  | -0.841161 |
| O | -0.612196 | -0.797319 | -0.274198 |
| O | -2.082897 | 0.092031  | -0.129177 |

== B3LYP/cc-pVTZ+d harmonic frequencies (cm<sup>-1</sup>) ==

|           |           |           |           |           |           |           |
|-----------|-----------|-----------|-----------|-----------|-----------|-----------|
| -723.3235 | 106.4119  | 180.1855  | 192.2029  | 210.6768  | 242.7670  | 335.0221  |
| 348.3646  | 401.7137  | 411.4388  | 480.1318  | 530.8473  | 754.2206  | 764.4269  |
| 868.1073  | 909.8624  | 957.4954  | 983.0920  | 1029.0132 | 1036.6748 | 1158.7278 |
| 1265.3814 | 1326.8174 | 1400.6343 | 1411.9795 | 1465.1336 | 1474.2970 | 1490.3417 |
| 1498.6409 | 1510.3099 | 3034.8933 | 3040.6053 | 3100.0703 | 3105.1350 | 3116.1359 |
| 3120.0357 | 3158.1296 | 3273.0329 | 3784.3896 |           |           |           |

== Thermochemistry energies (hartree) ==

ZPVE = 0.120003 (after scaling by 0.985)  
W1 Ee = -308.251146 (total electronic energy)  
W1 U0 = -308.131144 (Zero-kelvin internal energy)

[ CCSDT-F12a/cc-pVDZ-F12 data ]

CCSD(T)-F12a/cc-pVDZ-F12 Ee = -307.737109 (total electronic energy)

# Hydrocarbon 5: neopentyl

## Species 1: ·R

[ W1 data ]

== B3LYP/cc-pVTZ+d equilibrium geometry (Angstrom) ==

|   |           |           |           |
|---|-----------|-----------|-----------|
| C | -0.000005 | 1.320684  | -0.753285 |
| C | 0.000000  | -0.001686 | 0.054897  |
| C | 1.258699  | -0.808909 | -0.308833 |
| C | -1.258695 | -0.808916 | -0.308832 |
| C | -0.000000 | 0.314303  | 1.517295  |
| H | 0.882453  | 1.919408  | -0.523874 |
| H | -0.882466 | 1.919403  | -0.523873 |
| H | -0.000004 | 1.112215  | -1.826312 |
| H | 0.926270  | 0.515943  | 2.038541  |
| H | -0.926271 | 0.515943  | 2.038541  |
| H | -2.164819 | -0.254131 | -0.058074 |
| H | -1.284921 | -1.756526 | 0.231099  |
| H | -1.284964 | -1.027242 | -1.378262 |
| H | 2.164820  | -0.254117 | -0.058076 |
| H | 1.284969  | -1.027234 | -1.378263 |
| H | 1.284933  | -1.756518 | 0.231098  |

== B3LYP/cc-pVTZ+d harmonic frequencies (cm<sup>-1</sup>) ==

|           |           |           |           |           |           |           |
|-----------|-----------|-----------|-----------|-----------|-----------|-----------|
| 106.5750  | 223.5441  | 271.5708  | 276.4896  | 309.0223  | 330.4343  | 389.5571  |
| 415.5578  | 417.3262  | 554.9511  | 736.9411  | 906.1956  | 911.9028  | 947.2156  |
| 952.2161  | 962.0325  | 1031.4285 | 1076.6879 | 1200.1347 | 1264.3617 | 1278.0764 |
| 1391.7524 | 1399.1188 | 1419.7938 | 1465.5041 | 1480.7889 | 1487.2601 | 1489.1176 |
| 1503.1149 | 1504.4361 | 1519.1660 | 3012.6404 | 3017.4487 | 3023.6726 | 3074.5707 |
| 3078.5879 | 3083.3933 | 3084.2489 | 3088.7211 | 3091.1544 | 3127.4082 | 3227.6421 |

== Thermochemistry energies (hartree) ==

ZPVE = 0.141668 (after scaling by 0.985)  
W1 Ee = -197.141099 (total electronic energy)  
W1 U0 = -196.999431 (Zero-kelvin internal energy)

[ CCSDT-F12a/cc-pVDZ-F12 data ]

CCSD(T)-F12a/cc-pVDZ-F12 Ee = -196.793722 (total electronic energy)

## Species 2: ROO·

[ W1 data ]

== B3LYP/cc-pVTZ+d equilibrium geometry (Angstrom) ==

|   |           |           |           |
|---|-----------|-----------|-----------|
| C | -1.063554 | -1.018643 | -1.089256 |
| C | -0.747680 | 0.031173  | -0.013335 |
| C | -1.927658 | 0.145185  | 0.965624  |
| C | -0.481716 | 1.394391  | -0.666931 |
| C | 0.465868  | -0.414646 | 0.814125  |
| H | -1.274865 | -1.992396 | -0.642476 |
| H | -0.230913 | -1.139395 | -1.781870 |
| H | -1.940053 | -0.718943 | -1.665593 |
| H | 0.732530  | 0.316984  | 1.574524  |
| H | 0.282019  | -1.386665 | 1.274502  |
| H | 0.361704  | 1.351582  | -1.355179 |
| H | -0.262106 | 2.157344  | 0.081515  |
| H | -1.359093 | 1.716973  | -1.229980 |
| H | -2.140251 | -0.810148 | 1.449619  |
| H | -2.828532 | 0.455943  | 0.434842  |
| H | -1.729905 | 0.883449  | 1.745090  |
| O | 1.650641  | -0.622680 | -0.005948 |
| O | 2.464097  | 0.415244  | 0.012654  |

== B3LYP/cc-pVTZ+d harmonic frequencies (cm<sup>-1</sup>) ==

|           |           |           |           |           |           |           |
|-----------|-----------|-----------|-----------|-----------|-----------|-----------|
| 67.2322   | 96.3604   | 214.3459  | 229.7828  | 260.9030  | 265.8219  | 307.0666  |
| 335.9743  | 389.6075  | 406.1536  | 480.1114  | 553.0345  | 739.8855  | 883.4435  |
| 912.3390  | 932.5342  | 944.4727  | 963.9107  | 968.8674  | 1048.3496 | 1085.0899 |
| 1159.5049 | 1232.5810 | 1248.1471 | 1275.8564 | 1320.9303 | 1368.2178 | 1404.2359 |
| 1408.3626 | 1437.2366 | 1470.6616 | 1483.4225 | 1489.3524 | 1491.5669 | 1508.8469 |
| 1509.1239 | 1521.1851 | 3020.5321 | 3024.9991 | 3031.3061 | 3048.8968 | 3080.5358 |
| 3084.0447 | 3086.2493 | 3091.1858 | 3100.3205 | 3104.8386 | 3114.9399 |           |

== Thermochemistry energies (hartree) ==

ZPVE = 0.153045 (after scaling by 0.985)  
W1 Ee = -347.616877 (total electronic energy)  
W1 U0 = -347.463832 (Zero-kelvin internal energy)

[ CCSDT-F12a/cc-pVDZ-F12 data ]

CCSD(T)-F12a/cc-pVDZ-F12 Ee = -347.033300 (total electronic energy)

### Species 3: ·QOOH

[ W1 data ]

== B3LYP/cc-pVTZ+d equilibrium geometry (Angstrom) ==

|   |           |           |           |
|---|-----------|-----------|-----------|
| C | -1.090901 | 0.819175  | 1.235392  |
| C | -0.757997 | -0.072705 | 0.030108  |
| C | -1.979130 | -0.139922 | -0.922839 |
| C | -0.409571 | -1.456614 | 0.477090  |
| C | 0.398603  | 0.558631  | -0.783508 |
| H | -1.402166 | 1.813394  | 0.910178  |
| H | -0.224900 | 0.936204  | 1.886051  |
| H | -1.904533 | 0.387887  | 1.820486  |
| H | 0.624035  | -0.036070 | -1.671569 |
| H | 0.107767  | 1.564181  | -1.099818 |
| H | 1.928120  | -0.930355 | 0.721946  |
| H | -0.066123 | -2.188790 | -0.242015 |
| H | -0.701939 | -1.812020 | 1.455955  |
| H | -2.242816 | 0.858228  | -1.280755 |
| H | -2.845019 | -0.553635 | -0.406297 |
| H | -1.771207 | -0.769336 | -1.789165 |
| O | 1.593985  | 0.772145  | -0.046966 |
| O | 2.347610  | -0.462281 | -0.018341 |

== B3LYP/cc-pVTZ+d harmonic frequencies (cm<sup>-1</sup>) ==

|           |           |           |           |           |           |           |
|-----------|-----------|-----------|-----------|-----------|-----------|-----------|
| 82.2195   | 145.9221  | 168.2912  | 223.1865  | 238.9078  | 258.9470  | 282.1709  |
| 306.1951  | 341.5138  | 396.1744  | 401.9358  | 453.8458  | 553.4559  | 621.5174  |
| 757.7773  | 867.5341  | 893.2415  | 930.4618  | 947.8231  | 956.2221  | 1010.9234 |
| 1024.9251 | 1056.1846 | 1164.6371 | 1242.9597 | 1253.6327 | 1328.9846 | 1371.1282 |
| 1389.0006 | 1397.1891 | 1417.2041 | 1454.5062 | 1469.8460 | 1487.3982 | 1492.2050 |
| 1503.8472 | 1512.0371 | 3016.6355 | 3021.3596 | 3029.7800 | 3068.5296 | 3081.6000 |
| 3087.7546 | 3098.3088 | 3103.4782 | 3126.9234 | 3227.6601 | 3662.9664 |           |

== Thermochemistry energies (hartree) ==

ZPVE = 0.150188 (after scaling by 0.985)  
W1 Ee = -347.587649 (total electronic energy)  
W1 U0 = -347.437461 (Zero-kelvin internal energy)

[ CCSDT-F12a/cc-pVDZ-F12 data ]

CCSD(T)-F12a/cc-pVDZ-F12 Ee = -347.003692 (total electronic energy)

## Species 4: *cy*-ether

[ W1 data ]

== B3LYP/cc-pVTZ+d equilibrium geometry (Angstrom) ==

|   |           |           |           |
|---|-----------|-----------|-----------|
| C | 1.256610  | 1.229964  | -0.000000 |
| C | -0.022024 | 0.399781  | -0.000000 |
| C | -1.263979 | 1.280916  | 0.000000  |
| C | -0.022024 | -0.751949 | 1.035745  |
| C | -0.022024 | -0.751949 | -1.035745 |
| H | 1.305245  | 1.872628  | -0.881946 |
| H | 2.141497  | 0.591900  | -0.000000 |
| H | 1.305245  | 1.872628  | 0.881946  |
| H | -0.947951 | -0.860014 | -1.608560 |
| H | 0.829678  | -0.783053 | -1.720164 |
| H | -1.285746 | 1.926232  | -0.881157 |
| H | -1.285746 | 1.926232  | 0.881157  |
| H | -2.176172 | 0.682589  | 0.000000  |
| O | 0.084107  | -1.753331 | 0.000000  |
| H | -0.947951 | -0.860014 | 1.608560  |
| H | 0.829678  | -0.783053 | 1.720164  |

== B3LYP/cc-pVTZ+d harmonic frequencies (cm<sup>-1</sup>) ==

|           |           |           |           |           |           |           |
|-----------|-----------|-----------|-----------|-----------|-----------|-----------|
| 34.6704   | 223.8302  | 259.8063  | 312.7795  | 343.2038  | 391.5052  | 409.3193  |
| 637.9879  | 847.4178  | 881.6497  | 925.2201  | 940.6626  | 961.3668  | 972.6534  |
| 1019.3739 | 1024.1427 | 1062.2610 | 1158.5618 | 1159.8996 | 1220.3854 | 1263.4308 |
| 1293.0637 | 1310.6244 | 1375.9176 | 1407.4388 | 1427.1057 | 1488.2422 | 1491.5137 |
| 1503.9612 | 1505.9809 | 1518.7575 | 1537.3345 | 2997.5010 | 3005.9835 | 3014.7488 |
| 3021.8248 | 3043.5209 | 3044.2681 | 3071.5826 | 3076.7520 | 3085.2035 | 3087.0035 |

== Thermochemistry energies (hartree) ==

ZPVE = 0.139932 (after scaling by 0.985)  
W1 Ee = -271.834575 (total electronic energy)  
W1 U0 = -271.694643 (Zero-kelvin internal energy)

[ CCSDT-F12a/cc-pVDZ-F12 data ]

CCSD(T)-F12a/cc-pVDZ-F12 Ee = -271.369407 (total electronic energy)

## Species 5: dimethylcyclopropane

[ W1 data ]

== B3LYP/cc-pVTZ+d equilibrium geometry (Angstrom) ==

|   |           |           |           |
|---|-----------|-----------|-----------|
| C | -0.969464 | 1.272901  | 0.000006  |
| C | -0.149643 | 0.000000  | 0.000167  |
| C | -0.969464 | -1.272901 | 0.000006  |
| C | 1.153212  | 0.000000  | 0.755277  |
| C | 1.153112  | 0.000000  | -0.755332 |
| H | -1.612454 | 1.325254  | -0.882306 |
| H | -0.331866 | 2.157967  | -0.000111 |
| H | -1.612462 | 1.325504  | 0.882303  |
| H | -1.612454 | -1.325254 | -0.882306 |
| H | -1.612462 | -1.325504 | 0.882303  |
| H | -0.331866 | -2.157967 | -0.000111 |
| H | 1.451600  | 0.908105  | -1.261682 |
| H | 1.451600  | -0.908105 | -1.261682 |
| H | 1.451924  | -0.908136 | 1.261424  |
| H | 1.451924  | 0.908136  | 1.261424  |

== B3LYP/cc-pVTZ+d harmonic frequencies (cm<sup>-1</sup>) ==

|           |           |           |           |           |           |           |
|-----------|-----------|-----------|-----------|-----------|-----------|-----------|
| 218.1382  | 242.1242  | 328.7420  | 352.8845  | 362.1249  | 396.1359  | 685.2570  |
| 791.7205  | 847.8843  | 902.0329  | 943.3228  | 946.5531  | 976.2402  | 1042.3030 |
| 1066.9208 | 1077.7220 | 1086.0058 | 1159.4654 | 1188.8213 | 1317.6411 | 1350.8070 |
| 1413.6465 | 1426.2415 | 1472.6796 | 1483.9442 | 1495.7395 | 1502.0405 | 1504.9862 |
| 1518.9348 | 3009.5786 | 3014.4939 | 3060.7114 | 3063.6203 | 3082.4996 | 3084.6356 |
| 3116.4707 | 3120.9059 | 3189.3727 | 3203.5157 |           |           |           |

== Thermochemistry energies (hartree) ==

ZPVE = 0.134745 (after scaling by 0.985)  
W1 Ee = -196.572485 (total electronic energy)  
W1 U0 = -196.437740 (Zero-kelvin internal energy)

[ CCSDT-F12a/cc-pVDZ-F12 data ]

CCSD(T)-F12a/cc-pVDZ-F12 Ee = -196.224590 (total electronic energy)

Species 6: Transition state along  $\text{ROO} \cdot \xrightarrow{\text{TS1}} \cdot\text{QOOH}$

[ W1 data ]

== B3LYP/cc-pVTZ+d equilibrium geometry (Angstrom) ==

|   |           |           |           |
|---|-----------|-----------|-----------|
| C | 0.707075  | 0.050851  | 0.025572  |
| C | 0.154903  | 1.383846  | 0.478728  |
| H | 0.347332  | 1.680071  | 1.505029  |
| H | 0.214681  | 2.201897  | -0.234343 |
| H | -1.210426 | 1.104396  | 0.420922  |
| C | 1.062317  | -0.825013 | 1.235364  |
| H | 0.185503  | -1.005972 | 1.856105  |
| H | 1.454887  | -1.791986 | 0.915548  |
| H | 1.822977  | -0.341219 | 1.849769  |
| C | 1.940430  | 0.246386  | -0.878643 |
| H | 2.313099  | -0.715685 | -1.237053 |
| H | 1.703309  | 0.863991  | -1.746031 |
| H | 2.745683  | 0.733762  | -0.328522 |
| C | -0.386113 | -0.666027 | -0.823831 |
| H | -0.571399 | -0.122368 | -1.753789 |
| H | -0.088067 | -1.691569 | -1.047738 |
| O | -2.134812 | 0.520714  | 0.033612  |
| O | -1.588845 | -0.777662 | -0.086492 |

== B3LYP/cc-pVTZ+d harmonic frequencies (cm<sup>-1</sup>) ==

|            |           |           |           |           |           |           |
|------------|-----------|-----------|-----------|-----------|-----------|-----------|
| -1672.4632 | 105.8628  | 230.0798  | 248.5721  | 274.1338  | 306.2501  | 326.2725  |
| 391.1029   | 433.2567  | 454.6837  | 487.6370  | 539.6671  | 644.9972  | 759.4820  |
| 876.7261   | 911.0838  | 939.2342  | 943.4082  | 972.6930  | 998.5053  | 1028.7185 |
| 1045.9490  | 1074.1655 | 1117.6902 | 1200.3641 | 1224.6274 | 1244.4312 | 1311.4523 |
| 1358.8324  | 1399.8725 | 1419.5323 | 1459.3651 | 1472.1839 | 1489.4159 | 1495.6086 |
| 1505.2608  | 1511.9057 | 1570.6164 | 3019.3201 | 3023.1685 | 3029.7630 | 3081.5034 |
| 3083.8540  | 3085.4367 | 3089.7680 | 3095.8197 | 3106.0438 | 3170.1797 |           |

== Thermochemistry energies (hartree) ==

ZPVE = 0.147113 (after scaling by 0.985)  
W1 Ee = -347.571564 (total electronic energy)  
W1 U0 = -347.424451 (Zero-kelvin internal energy)

[ CCSDT-F12a/cc-pVDZ-F12 data ]

CCSD(T)-F12a/cc-pVDZ-F12 Ee = -346.987990 (total electronic energy)



Species 7: Transition state along  $\text{ROO} \cdot \xrightarrow{\text{TS}_2} \text{alkene} + \cdot\text{OOH}$

[ W1 data ]

== B3LYP/cc-pVTZ+d equilibrium geometry (Angstrom) ==

|   |           |           |           |
|---|-----------|-----------|-----------|
| C | 0.016496  | -0.000793 | -0.943532 |
| H | 0.409906  | 0.916804  | -1.348344 |
| H | 0.409603  | -0.919094 | -1.347051 |
| C | -1.128907 | 0.000008  | -0.043670 |
| C | -0.007352 | 0.000148  | 1.028353  |
| H | -0.049984 | -0.908539 | 1.624928  |
| H | 1.192763  | 0.000642  | 0.787506  |
| H | -0.050297 | 0.908853  | 1.624921  |
| C | -1.974654 | -1.266502 | -0.048660 |
| H | -2.616557 | -1.302601 | 0.833167  |
| H | -2.613607 | -1.300842 | -0.933170 |
| H | -1.350665 | -2.160919 | -0.048926 |
| O | 2.618644  | 0.000750  | 0.594962  |
| O | 2.588442  | -0.000728 | -0.681852 |
| C | -1.973893 | 1.267014  | -0.049885 |
| H | -2.612792 | 1.300890  | -0.934468 |
| H | -2.615820 | 1.304310  | 0.831892  |
| H | -1.349379 | 2.161083  | -0.050963 |

== B3LYP/cc-pVTZ+d harmonic frequencies (cm<sup>-1</sup>) ==

|            |           |           |           |           |           |           |
|------------|-----------|-----------|-----------|-----------|-----------|-----------|
| -1149.5548 | 50.2724   | 82.9078   | 154.7102  | 229.5117  | 239.6510  | 291.2708  |
| 326.9980   | 343.8853  | 395.6228  | 428.9280  | 464.9554  | 469.0334  | 723.1280  |
| 755.4133   | 846.1835  | 864.5661  | 925.3238  | 958.5918  | 966.8998  | 984.6299  |
| 1011.0452  | 1044.2671 | 1070.0913 | 1187.7166 | 1269.7627 | 1300.7233 | 1342.5006 |
| 1408.0932  | 1421.9730 | 1427.7414 | 1432.0527 | 1480.5246 | 1487.5065 | 1493.8580 |
| 1506.7016  | 1514.7382 | 1707.5408 | 3022.1756 | 3026.7741 | 3047.8462 | 3083.3572 |
| 3087.8601  | 3092.2915 | 3094.7118 | 3143.1901 | 3184.3910 | 3289.3227 |           |

== Thermochemistry energies (hartree) ==

ZPVE = 0.145145 (after scaling by 0.985)  
W1 Ee = -347.502385 (total electronic energy)  
W1 U0 = -347.357240 (Zero-kelvin internal energy)

[ CCSDT-F12a/cc-pVDZ-F12 data ]

CCSD(T)-F12a/cc-pVDZ-F12 Ee = -346.919350 (total electronic energy)

Species 8: Transition state along  $\cdot\text{QOOH} \xrightarrow{\text{TS}_3} \text{alkene} + \cdot\text{OOH}$

[ W1 data ]

== B3LYP/cc-pVTZ+d equilibrium geometry (Angstrom) ==

|   |           |           |           |
|---|-----------|-----------|-----------|
| C | 1.051209  | -0.043657 | 0.026330  |
| C | 0.169407  | 0.214992  | 1.186033  |
| H | 0.051473  | 1.212997  | 1.575672  |
| H | -0.451165 | -0.567179 | 1.591307  |
| H | -3.046455 | -0.660042 | -0.764728 |
| C | 1.519893  | -1.490496 | -0.096900 |
| H | 0.686921  | -2.184282 | 0.020926  |
| H | 1.975006  | -1.667346 | -1.073471 |
| H | 2.260633  | -1.718789 | 0.671455  |
| C | 2.195469  | 0.953427  | -0.129967 |
| H | 2.675026  | 0.843888  | -1.104514 |
| H | 1.838374  | 1.980234  | -0.041325 |
| H | 2.949628  | 0.791362  | 0.642497  |
| C | -0.163545 | 0.277914  | -0.793791 |
| H | -0.172105 | 1.238666  | -1.287269 |
| H | -0.604517 | -0.543551 | -1.338868 |
| O | -2.668841 | -0.481428 | 0.107766  |
| O | -1.930837 | 0.706548  | -0.113004 |

== B3LYP/cc-pVTZ+d harmonic frequencies (cm<sup>-1</sup>) ==

|           |           |           |           |           |           |           |
|-----------|-----------|-----------|-----------|-----------|-----------|-----------|
| -682.6153 | 53.2290   | 65.9449   | 218.6590  | 229.7941  | 242.4906  | 284.2312  |
| 332.6664  | 351.0875  | 378.1500  | 392.1771  | 414.1708  | 454.2027  | 581.4693  |
| 699.1829  | 753.2800  | 848.3401  | 897.1624  | 924.4887  | 932.6014  | 962.2642  |
| 1027.5657 | 1032.2454 | 1067.8991 | 1093.5767 | 1192.8272 | 1296.7841 | 1309.3465 |
| 1355.1427 | 1404.4073 | 1415.7479 | 1432.2422 | 1477.3386 | 1487.1305 | 1490.5616 |
| 1504.3633 | 1509.1494 | 3020.0294 | 3024.8682 | 3081.9028 | 3086.3899 | 3090.2861 |
| 3094.2881 | 3124.5072 | 3170.6565 | 3231.1471 | 3279.9067 | 3718.9681 |           |

== Thermochemistry energies (hartree) ==

ZPVE = 0.148182 (after scaling by 0.985)  
W1 Ee = -347.506284 (total electronic energy)  
W1 U0 = -347.358101 (Zero-kelvin internal energy)

[ CCSDT-F12a/cc-pVDZ-F12 data ]

CCSD(T)-F12a/cc-pVDZ-F12 Ee = -346.922922 (total electronic energy)

Species 9: Transition state along  $\cdot\text{QOOH} \xrightarrow{\text{TS4}} \text{cycloether} + \cdot\text{OH}$

[ W1 data ]

== B3LYP/cc-pVTZ+d equilibrium geometry (Angstrom) ==

|   |           |           |           |
|---|-----------|-----------|-----------|
| C | 0.906396  | -0.004647 | -0.007550 |
| C | 0.403864  | -0.272665 | 1.392132  |
| H | 0.316899  | -1.292238 | 1.741558  |
| H | 0.407140  | 0.502206  | 2.144696  |
| H | -3.275789 | -0.488035 | 0.270088  |
| C | 1.991509  | -0.988273 | -0.456328 |
| H | 1.665813  | -2.021779 | -0.330878 |
| H | 2.235009  | -0.837970 | -1.510159 |
| H | 2.906540  | -0.848012 | 0.121808  |
| C | 1.382912  | 1.444141  | -0.147539 |
| H | 1.667054  | 1.658703  | -1.178898 |
| H | 0.592875  | 2.139070  | 0.138728  |
| H | 2.250733  | 1.632043  | 0.487515  |
| C | -0.437976 | -0.216282 | -0.725362 |
| H | -0.661212 | 0.513542  | -1.504364 |
| H | -0.551787 | -1.224551 | -1.133629 |
| O | -2.816356 | 0.094721  | -0.348284 |
| O | -1.312832 | -0.033049 | 0.400961  |

== B3LYP/cc-pVTZ+d harmonic frequencies (cm<sup>-1</sup>) ==

|           |           |           |           |           |           |           |
|-----------|-----------|-----------|-----------|-----------|-----------|-----------|
| -779.6758 | 69.1582   | 121.0792  | 155.5432  | 213.4047  | 240.5013  | 280.7748  |
| 314.8897  | 326.8760  | 397.7864  | 414.1187  | 428.6868  | 535.3341  | 565.6617  |
| 778.9146  | 829.1723  | 907.8743  | 923.6847  | 956.1848  | 969.5396  | 995.7464  |
| 1003.9663 | 1058.3862 | 1093.2361 | 1186.8764 | 1224.5991 | 1242.1801 | 1284.5027 |
| 1346.5597 | 1402.6298 | 1419.1037 | 1470.1641 | 1489.0961 | 1491.1290 | 1504.3355 |
| 1512.0771 | 1523.5266 | 3010.6206 | 3020.4076 | 3026.5377 | 3070.4740 | 3081.2668 |
| 3087.1387 | 3089.5113 | 3097.0692 | 3138.4276 | 3241.1295 | 3790.5885 |           |

== Thermochemistry energies (hartree) ==

ZPVE = 0.148845 (after scaling by 0.985)  
W1 Ee = -347.557801 (total electronic energy)  
W1 U0 = -347.408955 (Zero-kelvin internal energy)

[ CCSDT-F12a/cc-pVDZ-F12 data ]

CCSD(T)-F12a/cc-pVDZ-F12 Ee = -346.974577 (total electronic energy)

# Hydrocarbon 6: cyclohexyl

## Species 1: ·R

[ W1 data ]

== B3LYP/cc-pVTZ+d equilibrium geometry (Angstrom) ==

|   |           |           |           |
|---|-----------|-----------|-----------|
| C | 1.285611  | -0.776670 | 0.155807  |
| C | -0.000018 | -1.460529 | -0.162801 |
| C | -1.285630 | -0.776640 | 0.155807  |
| C | -1.264955 | 0.710844  | -0.240619 |
| C | 0.000017  | 1.408445  | 0.267198  |
| C | 1.264973  | 0.710813  | -0.240619 |
| H | 2.156968  | 1.210222  | 0.143880  |
| H | 1.303304  | 0.789616  | -1.331113 |
| H | 0.000017  | 1.407584  | 1.362970  |
| H | 0.000030  | 2.456287  | -0.041544 |
| H | -2.156938 | 1.210274  | 0.143879  |
| H | -1.303282 | 0.789647  | -1.331113 |
| H | -1.477514 | -0.834498 | 1.241601  |
| H | -2.125418 | -1.287915 | -0.319242 |
| H | -0.000036 | -2.516295 | -0.400319 |
| H | 2.125386  | -1.287967 | -0.319240 |
| H | 1.477492  | -0.834532 | 1.241601  |

== B3LYP/cc-pVTZ+d harmonic frequencies (cm<sup>-1</sup>) ==

|           |           |           |           |           |           |           |
|-----------|-----------|-----------|-----------|-----------|-----------|-----------|
| 171.7952  | 208.1574  | 325.0412  | 391.0507  | 438.7415  | 459.0014  | 610.1012  |
| 781.8569  | 804.8087  | 854.4815  | 869.9876  | 874.5867  | 926.3200  | 1014.8169 |
| 1032.8107 | 1056.1635 | 1096.2443 | 1112.9207 | 1129.7121 | 1151.8428 | 1254.1347 |
| 1282.6884 | 1294.9830 | 1340.5850 | 1351.9578 | 1352.2727 | 1378.3623 | 1391.6388 |
| 1397.1527 | 1467.6569 | 1472.2412 | 1490.3116 | 1493.3079 | 1503.7239 | 2892.2698 |
| 2897.0248 | 2996.3819 | 3011.3840 | 3012.3755 | 3044.8108 | 3046.4316 | 3049.1622 |
| 3050.4108 | 3054.6026 | 3164.3272 |           |           |           |           |

== Thermochemistry energies (hartree) ==

ZPVE = 0.152593 (after scaling by 0.985)  
W1 Ee = -235.263378 (total electronic energy)  
W1 U0 = -235.110785 (Zero-kelvin internal energy)

[ CCSDT-F12a/cc-pVDZ-F12 data ]

CCSD(T)-F12a/cc-pVDZ-F12 Ee = -234.846696 (total electronic energy)

## Species 2: ROO·

[ W1 data ]

== B3LYP/cc-pVTZ+d equilibrium geometry (Angstrom) ==

|   |           |           |           |
|---|-----------|-----------|-----------|
| C | -0.119638 | 1.155889  | -0.276634 |
| C | -0.645763 | -0.178900 | 0.231288  |
| C | 0.231637  | -1.348214 | -0.185092 |
| C | 1.675324  | -1.126332 | 0.284971  |
| C | 2.231458  | 0.214877  | -0.203477 |
| C | 1.320679  | 1.379003  | 0.199237  |
| H | 1.699481  | 2.318348  | -0.207215 |
| H | 1.330731  | 1.487456  | 1.288548  |
| H | 2.325092  | 0.191081  | -1.293929 |
| H | 3.237413  | 0.369413  | 0.191726  |
| H | 2.302704  | -1.948923 | -0.062342 |
| H | 1.707338  | -1.154241 | 1.378824  |
| H | 0.205799  | -1.435338 | -1.275015 |
| H | -0.170493 | -2.277510 | 0.221203  |
| H | -0.776089 | -0.151626 | 1.314687  |
| O | -1.980637 | -0.436210 | -0.323281 |
| O | -2.906136 | 0.301090  | 0.254242  |
| H | -0.777207 | 1.955824  | 0.064176  |
| H | -0.152766 | 1.148533  | -1.370114 |

== B3LYP/cc-pVTZ+d harmonic frequencies (cm<sup>-1</sup>) ==

|           |           |           |           |           |           |           |
|-----------|-----------|-----------|-----------|-----------|-----------|-----------|
| 81.1545   | 130.6329  | 224.5551  | 252.9058  | 322.6707  | 365.0373  | 441.3029  |
| 455.4165  | 506.7986  | 565.5207  | 799.0743  | 806.9319  | 847.1910  | 897.4338  |
| 899.4400  | 918.6785  | 938.6364  | 1018.4923 | 1046.3655 | 1067.4776 | 1090.5707 |
| 1100.4070 | 1172.3633 | 1186.5406 | 1213.6701 | 1273.3250 | 1286.3746 | 1290.6021 |
| 1332.1647 | 1340.1457 | 1368.7684 | 1377.4263 | 1379.2436 | 1384.2980 | 1396.4021 |
| 1490.8745 | 1492.4407 | 1495.3904 | 1500.8036 | 1513.7810 | 3004.2342 | 3008.3862 |
| 3014.7293 | 3021.9232 | 3024.6455 | 3049.9925 | 3057.3473 | 3060.0779 | 3063.4413 |
| 3073.8966 | 3084.0187 |           |           |           |           |           |

== Thermochemistry energies (hartree) ==

ZPVE = 0.163214 (after scaling by 0.985)  
W1 Ee = -385.741148 (total electronic energy)  
W1 U0 = -385.577934 (Zero-kelvin internal energy)

[ CCSDT-F12a/cc-pVDZ-F12 data ]

CCSD(T)-F12a/cc-pVDZ-F12 Ee = -385.088450 (total electronic energy)

### Species 3: ·QOOH

[ W1 data ]

== B3LYP/cc-pVTZ+d equilibrium geometry (Angstrom) ==

|   |           |           |           |
|---|-----------|-----------|-----------|
| C | -0.624685 | -0.207931 | 0.245677  |
| C | 0.313967  | -1.351706 | -0.157268 |
| C | 1.748666  | -1.064431 | 0.298789  |
| C | 2.266775  | 0.261398  | -0.262880 |
| C | 1.343548  | 1.430535  | 0.124347  |
| C | -0.087158 | 1.121347  | -0.152553 |
| H | -0.787815 | 1.899876  | -0.416331 |
| H | 1.643710  | 2.345333  | -0.389472 |
| H | 1.484706  | 1.634034  | 1.199739  |
| H | 2.319516  | 0.193643  | -1.352921 |
| H | 3.280881  | 0.453762  | 0.093371  |
| H | 2.398212  | -1.885427 | -0.010724 |
| H | 1.785838  | -1.036560 | 1.392994  |
| H | 0.283462  | -1.450436 | -1.245014 |
| H | -0.051921 | -2.287905 | 0.266534  |
| O | -1.878998 | -0.514603 | -0.373770 |
| O | -2.863109 | 0.438170  | 0.110524  |
| H | -3.414631 | -0.142565 | 0.651480  |
| H | -0.771779 | -0.247569 | 1.339654  |

== B3LYP/cc-pVTZ+d harmonic frequencies (cm<sup>-1</sup>) ==

|           |           |           |           |           |           |           |
|-----------|-----------|-----------|-----------|-----------|-----------|-----------|
| 96.1273   | 118.7914  | 186.0180  | 202.7855  | 241.9066  | 314.4685  | 347.1631  |
| 372.6427  | 456.3801  | 491.4717  | 530.3264  | 607.5270  | 793.4726  | 838.3919  |
| 868.0652  | 902.8012  | 907.4420  | 940.4775  | 965.6743  | 1035.0423 | 1057.6489 |
| 1070.5289 | 1103.4948 | 1111.7295 | 1149.0862 | 1205.4523 | 1258.6561 | 1278.3585 |
| 1314.6222 | 1328.7898 | 1347.2849 | 1351.5667 | 1363.8920 | 1375.0533 | 1382.3228 |
| 1398.8538 | 1472.8184 | 1491.8575 | 1495.6451 | 1504.5781 | 2882.7603 | 2902.2527 |
| 3003.8314 | 3018.5884 | 3030.9419 | 3054.0264 | 3056.1840 | 3059.6996 | 3074.9549 |
| 3197.2121 | 3757.6729 |           |           |           |           |           |

== Thermochemistry energies (hartree) ==

ZPVE = 0.160036 (after scaling by 0.985)  
W1 Ee = -385.714406 (total electronic energy)  
W1 U0 = -385.554370 (Zero-kelvin internal energy)

[ CCSDT-F12a/cc-pVDZ-F12 data ]

CCSD(T)-F12a/cc-pVDZ-F12 Ee = -385.061174 (total electronic energy)

## Species 4: *cy*-ether

[ W1 data ]

== B3LYP/cc-pVTZ+d equilibrium geometry (Angstrom) ==

|   |           |           |           |
|---|-----------|-----------|-----------|
| C | -0.987865 | 0.830017  | -0.295546 |
| C | 0.338182  | 1.513787  | -0.029632 |
| C | 1.547150  | 0.577683  | -0.171576 |
| C | 1.284886  | -0.801403 | 0.436723  |
| C | 0.132646  | -1.506742 | -0.286444 |
| C | -1.089957 | -0.632089 | -0.413301 |
| H | -1.903971 | -1.044883 | -1.004487 |
| O | -1.522839 | 0.034823  | 0.777730  |
| H | -0.139107 | -2.431682 | 0.228912  |
| H | 0.446924  | -1.792508 | -1.295933 |
| H | 1.039678  | -0.697354 | 1.495598  |
| H | 2.183409  | -1.417868 | 0.376827  |
| H | 2.423439  | 1.038355  | 0.287912  |
| H | 1.783634  | 0.453531  | -1.233188 |
| H | 0.299624  | 1.930038  | 0.980625  |
| H | 0.442356  | 2.361959  | -0.709699 |
| H | -1.743528 | 1.434301  | -0.789754 |

== B3LYP/cc-pVTZ+d harmonic frequencies (cm<sup>-1</sup>) ==

|           |           |           |           |           |           |           |
|-----------|-----------|-----------|-----------|-----------|-----------|-----------|
| 142.2384  | 270.9763  | 357.0682  | 375.4289  | 442.0543  | 543.0545  | 648.0426  |
| 767.0409  | 783.5150  | 828.9652  | 845.8561  | 892.1641  | 901.0616  | 985.6822  |
| 1005.5096 | 1043.5738 | 1051.9402 | 1080.3551 | 1101.6736 | 1171.7515 | 1194.6803 |
| 1211.0727 | 1278.1059 | 1289.9235 | 1304.6263 | 1359.9821 | 1372.0992 | 1377.2940 |
| 1391.6798 | 1400.6856 | 1462.9074 | 1481.4607 | 1486.2204 | 1494.7198 | 1503.1804 |
| 3005.9421 | 3008.2551 | 3022.8069 | 3031.8334 | 3045.4776 | 3054.1430 | 3062.1978 |
| 3071.9646 | 3088.5348 | 3103.5144 |           |           |           |           |

== Thermochemistry energies (hartree) ==

ZPVE = 0.148870 (after scaling by 0.985)  
W1 Ee = -309.958304 (total electronic energy)  
W1 U0 = -309.809434 (Zero-kelvin internal energy)

[ CCSDT-F12a/cc-pVDZ-F12 data ]

CCSD(T)-F12a/cc-pVDZ-F12 Ee = -309.423628 (total electronic energy)

## Species 5: alkene

[ W1 data ]

== B3LYP/cc-pVTZ+d equilibrium geometry (Angstrom) ==

|   |           |           |           |
|---|-----------|-----------|-----------|
| C | 1.493240  | 0.048413  | 0.109913  |
| C | 0.662624  | 1.302204  | 0.056893  |
| C | -0.662622 | 1.302205  | -0.056894 |
| C | -1.493241 | 0.048415  | -0.109910 |
| C | -0.696924 | -1.189909 | 0.315775  |
| C | 0.696922  | -1.189909 | -0.315777 |
| H | 1.240457  | -2.098105 | -0.048371 |
| H | 0.595292  | -1.193818 | -1.405178 |
| H | -0.595293 | -1.193822 | 1.405176  |
| H | -1.240459 | -2.098104 | 0.048367  |
| H | -2.375187 | 0.166413  | 0.526004  |
| H | -1.883533 | -0.086031 | -1.126065 |
| H | -1.191963 | 2.247292  | -0.112713 |
| H | 1.191967  | 2.247290  | 0.112709  |
| H | 1.883527  | -0.086035 | 1.126070  |
| H | 2.375190  | 0.166409  | -0.525997 |

== B3LYP/cc-pVTZ+d harmonic frequencies (cm<sup>-1</sup>) ==

|           |           |           |           |           |           |           |
|-----------|-----------|-----------|-----------|-----------|-----------|-----------|
| 165.0329  | 275.1674  | 401.6350  | 457.5924  | 502.9580  | 656.4664  | 732.0702  |
| 821.8436  | 828.8011  | 880.9519  | 909.8226  | 936.3328  | 1007.0416 | 1020.0417 |
| 1047.7464 | 1071.5715 | 1100.8874 | 1161.9743 | 1163.8994 | 1250.5929 | 1270.9635 |
| 1295.0380 | 1360.2879 | 1370.9567 | 1371.5383 | 1387.0763 | 1426.7188 | 1476.8697 |
| 1482.9182 | 1494.9827 | 1503.2465 | 1715.2585 | 2986.6406 | 2986.7016 | 3007.3717 |
| 3013.9008 | 3030.0963 | 3030.7614 | 3056.0484 | 3058.4174 | 3127.2057 | 3150.7630 |

== Thermochemistry energies (hartree) ==

ZPVE = 0.143607 (after scaling by 0.985)  
W1 Ee = -234.702725 (total electronic energy)  
W1 U0 = -234.559118 (Zero-kelvin internal energy)

[ CCSDT-F12a/cc-pVDZ-F12 data ]

CCSD(T)-F12a/cc-pVDZ-F12 Ee = -234.286061 (total electronic energy)



Species 6: Transition state along  $\text{ROO} \cdot \xrightarrow{\text{TS1}} \cdot\text{QOOH}$

[ W1 data ]

== B3LYP/cc-pVTZ+d equilibrium geometry (Angstrom) ==

|   |           |           |           |
|---|-----------|-----------|-----------|
| C | 0.302689  | 0.937921  | 0.315330  |
| C | 0.612007  | -0.436474 | -0.257855 |
| C | -0.422156 | -1.453410 | 0.192521  |
| C | -1.801921 | -0.940327 | -0.265911 |
| C | -2.106258 | 0.492955  | 0.201763  |
| C | -0.988961 | 1.505499  | -0.181212 |
| H | -1.208358 | 2.480545  | 0.254962  |
| H | -0.968000 | 1.624688  | -1.268009 |
| H | -2.223466 | 0.501892  | 1.288791  |
| H | -3.056951 | 0.825968  | -0.219148 |
| H | -2.580763 | -1.613882 | 0.095171  |
| H | -1.846408 | -0.978103 | -1.358384 |
| H | -0.389469 | -1.552663 | 1.279932  |
| H | -0.216256 | -2.435542 | -0.236890 |
| H | 0.622633  | -0.375484 | -1.353170 |
| O | 1.938293  | -0.681050 | 0.200071  |
| O | 2.597731  | 0.517321  | -0.186821 |
| H | 1.595818  | 1.236205  | -0.019179 |
| H | 0.410628  | 0.959225  | 1.402103  |

== B3LYP/cc-pVTZ+d harmonic frequencies (cm<sup>-1</sup>) ==

|            |           |           |           |           |           |           |
|------------|-----------|-----------|-----------|-----------|-----------|-----------|
| -2178.1664 | 156.3939  | 211.5943  | 288.0581  | 315.8147  | 336.7960  | 396.7274  |
| 469.5729   | 509.6141  | 582.0763  | 658.8706  | 797.6305  | 821.5081  | 837.0219  |
| 892.3221   | 910.5860  | 930.6988  | 947.7515  | 974.1276  | 1040.5129 | 1051.9244 |
| 1059.1881  | 1094.9272 | 1147.8896 | 1170.4303 | 1190.7421 | 1200.6941 | 1262.4362 |
| 1268.0694  | 1309.4695 | 1336.0935 | 1343.4117 | 1365.1512 | 1374.7062 | 1388.1256 |
| 1398.3576  | 1489.5444 | 1492.5293 | 1498.5046 | 1506.3188 | 1737.0515 | 2981.6498 |
| 3015.2339  | 3019.6568 | 3023.0462 | 3031.6298 | 3054.9007 | 3061.3475 | 3065.0021 |
| 3074.7051  | 3078.9996 |           |           |           |           |           |

== Thermochemistry energies (hartree) ==

ZPVE = 0.157460 (after scaling by 0.985)  
W1 Ee = -385.676154 (total electronic energy)  
W1 U0 = -385.518694 (Zero-kelvin internal energy)

[ CCSDT-F12a/cc-pVDZ-F12 data ]

CCSD(T)-F12a/cc-pVDZ-F12 Ee = -385.023595 (total electronic energy)

Species 7: Transition state along  $\text{ROO} \cdot \xrightarrow{\text{TS}_2} \text{alkene} + \cdot\text{OOH}$

[ W1 data ]

== B3LYP/cc-pVTZ+d equilibrium geometry (Angstrom) ==

|   |           |           |           |
|---|-----------|-----------|-----------|
| C | -0.361491 | 0.385879  | 1.042979  |
| C | -0.167309 | -0.970851 | 0.789359  |
| C | 1.030451  | -1.450090 | -0.042901 |
| C | 2.043260  | -0.335459 | -0.329491 |
| C | 1.339879  | 0.965970  | -0.720671 |
| C | 0.471918  | 1.466940  | 0.434949  |
| H | -0.162583 | 2.300359  | 0.127689  |
| H | 1.116708  | 1.862750  | 1.231929  |
| H | 0.713659  | 0.796040  | -1.600681 |
| H | 2.067298  | 1.731471  | -0.994921 |
| H | 2.731150  | -0.652928 | -1.114941 |
| H | 2.649600  | -0.154238 | 0.563759  |
| H | 0.681572  | -1.868590 | -0.991131 |
| H | 1.521592  | -2.271039 | 0.482199  |
| H | -0.496639 | -1.648751 | 1.573929  |
| O | -2.222550 | -0.611363 | -0.698211 |
| O | -2.119991 | 0.602407  | -0.324901 |
| H | -1.011701 | 0.676708  | 1.857139  |
| H | -1.210579 | -1.074462 | 0.004559  |

== B3LYP/cc-pVTZ+d harmonic frequencies (cm<sup>-1</sup>) ==

|           |           |           |           |           |           |           |
|-----------|-----------|-----------|-----------|-----------|-----------|-----------|
| -970.0540 | 82.6772   | 122.6384  | 197.6235  | 215.8693  | 305.2980  | 382.8677  |
| 444.1321  | 469.1231  | 542.9228  | 659.6322  | 715.6243  | 797.9577  | 821.5627  |
| 824.9761  | 882.6773  | 906.1261  | 946.0279  | 976.7028  | 1027.4372 | 1051.0282 |
| 1072.3713 | 1109.3340 | 1151.2179 | 1182.2528 | 1237.0721 | 1275.7602 | 1290.0458 |
| 1306.2665 | 1317.6166 | 1357.9196 | 1369.3722 | 1375.4279 | 1385.8844 | 1408.7133 |
| 1459.6318 | 1492.3522 | 1498.2637 | 1507.4051 | 1558.8811 | 1572.7744 | 2971.7847 |
| 3005.0488 | 3015.5359 | 3025.2248 | 3053.7986 | 3054.7274 | 3062.2286 | 3066.8253 |
| 3095.6018 | 3173.9225 |           |           |           |           |           |

== Thermochemistry energies (hartree) ==

ZPVE = 0.156690 (after scaling by 0.985)  
W1 Ee = -385.683105 (total electronic energy)  
W1 U0 = -385.526416 (Zero-kelvin internal energy)

[ CCSDT-F12a/cc-pVDZ-F12 data ]

CCSD(T)-F12a/cc-pVDZ-F12 Ee = -385.030289 (total electronic energy)

Species 8: Transition state along  $\cdot\text{QOOH} \xrightarrow{\text{TS}_3} \text{alkene} + \cdot\text{OOH}$

[ W1 data ]

== B3LYP/cc-pVTZ+d equilibrium geometry (Angstrom) ==

|   |           |           |           |
|---|-----------|-----------|-----------|
| C | 0.029951  | 0.962133  | -0.853940 |
| C | 0.434622  | -0.363423 | -0.804010 |
| C | -0.505905 | -1.438999 | -0.306554 |
| C | -1.888924 | -0.901392 | 0.083623  |
| C | -1.766701 | 0.429757  | 0.825857  |
| C | -1.137686 | 1.489166  | -0.084731 |
| H | -0.834498 | 2.367217  | 0.495942  |
| H | -1.889080 | 1.865509  | -0.792922 |
| H | -1.137049 | 0.292727  | 1.708637  |
| H | -2.741912 | 0.770273  | 1.177461  |
| H | -2.411248 | -1.638842 | 0.695093  |
| H | -2.496133 | -0.754115 | -0.814839 |
| H | -0.036493 | -1.929318 | 0.549939  |
| H | -0.600992 | -2.206770 | -1.077600 |
| H | 1.190555  | -0.677534 | -1.510165 |
| O | 1.656730  | -0.377746 | 0.642949  |
| O | 2.896071  | 0.147336  | 0.249105  |
| H | 2.902757  | 1.018094  | 0.670068  |
| H | 0.639537  | 1.672583  | -1.399520 |

== B3LYP/cc-pVTZ+d harmonic frequencies (cm<sup>-1</sup>) ==

|           |           |           |           |           |           |           |
|-----------|-----------|-----------|-----------|-----------|-----------|-----------|
| -482.5643 | 59.2492   | 91.8931   | 143.6848  | 198.3686  | 283.6295  | 334.5486  |
| 358.2804  | 409.4347  | 461.5376  | 499.3316  | 675.7740  | 722.3976  | 808.6234  |
| 821.3977  | 881.8042  | 887.9400  | 911.3757  | 948.1380  | 1012.7954 | 1052.2070 |
| 1061.3716 | 1067.4757 | 1084.8461 | 1154.5620 | 1164.5737 | 1223.1642 | 1263.7726 |
| 1295.8285 | 1358.2692 | 1368.2525 | 1369.1793 | 1373.1519 | 1386.7752 | 1422.3626 |
| 1458.4330 | 1476.7642 | 1497.0847 | 1503.8992 | 1508.7299 | 2962.5103 | 3002.5977 |
| 3009.6661 | 3025.8077 | 3029.1575 | 3052.5848 | 3064.0678 | 3067.3963 | 3148.9229 |
| 3172.6420 | 3724.3992 |           |           |           |           |           |

== Thermochemistry energies (hartree) ==

ZPVE = 0.159011 (after scaling by 0.985)  
W1 Ee = -385.687646 (total electronic energy)  
W1 U0 = -385.528635 (Zero-kelvin internal energy)

[ CCSDT-F12a/cc-pVDZ-F12 data ]

CCSD(T)-F12a/cc-pVDZ-F12 Ee = -385.034617 (total electronic energy)

Species 9: Transition state along  $\cdot\text{QOOH} \xrightarrow{\text{TS4}} \text{cycloether} + \cdot\text{OH}$

[ W1 data ]

== B3LYP/cc-pVTZ+d equilibrium geometry (Angstrom) ==

|   |           |           |           |
|---|-----------|-----------|-----------|
| C | -0.295192 | -1.232519 | 0.717086  |
| C | 0.609076  | -0.066475 | 0.822298  |
| C | 0.018636  | 1.322598  | 0.566035  |
| C | -1.418918 | 1.300853  | 0.019586  |
| C | -1.669403 | 0.107908  | -0.904495 |
| C | -1.512709 | -1.205583 | -0.130227 |
| H | -1.527423 | -2.071085 | -0.799992 |
| H | -2.380167 | -1.344634 | 0.533992  |
| H | -0.958887 | 0.124756  | -1.732453 |
| H | -2.671005 | 0.159466  | -1.333953 |
| H | -1.626862 | 2.236793  | -0.501010 |
| H | -2.127961 | 1.249885  | 0.852433  |
| H | 0.691966  | 1.811907  | -0.138111 |
| H | 0.055237  | 1.903479  | 1.489434  |
| H | 1.248264  | -0.082091 | 1.707832  |
| O | 1.269023  | -0.635776 | -0.287158 |
| O | 2.687404  | 0.295788  | -0.609733 |
| H | 3.261513  | -0.480163 | -0.655510 |
| H | -0.005032 | -2.149101 | 1.210772  |

== B3LYP/cc-pVTZ+d harmonic frequencies (cm<sup>-1</sup>) ==

|           |           |           |           |           |           |           |
|-----------|-----------|-----------|-----------|-----------|-----------|-----------|
| -682.2688 | 70.4393   | 124.0898  | 139.2454  | 154.1480  | 264.0097  | 289.2933  |
| 380.0902  | 408.7250  | 456.9549  | 520.2651  | 663.3137  | 704.4083  | 798.3671  |
| 816.9442  | 850.9887  | 872.3261  | 888.8443  | 957.1673  | 997.8799  | 1007.9818 |
| 1050.1419 | 1057.3020 | 1083.0810 | 1143.1282 | 1171.0744 | 1198.0060 | 1259.5371 |
| 1290.0996 | 1305.4877 | 1359.6124 | 1361.3637 | 1365.0399 | 1389.0275 | 1407.4392 |
| 1416.3649 | 1454.1175 | 1485.2250 | 1496.2610 | 1504.8415 | 2941.5466 | 3002.8438 |
| 3016.4412 | 3025.3572 | 3040.3076 | 3046.2904 | 3060.5019 | 3077.6156 | 3087.5863 |
| 3189.8777 | 3787.3882 |           |           |           |           |           |

== Thermochemistry energies (hartree) ==

ZPVE = 0.158063 (after scaling by 0.985)  
W1 Ee = -385.693129 (total electronic energy)  
W1 U0 = -385.535066 (Zero-kelvin internal energy)

[ CCSDT-F12a/cc-pVDZ-F12 data ]

CCSD(T)-F12a/cc-pVDZ-F12 Ee = -385.040470 (total electronic energy)

# Hydrocarbon 7: cyclohexenyl

## Species 1: ·R

[ W1 data ]

== B3LYP/cc-pVTZ+d equilibrium geometry (Angstrom) ==

|   |           |           |           |
|---|-----------|-----------|-----------|
| C | -1.270924 | -0.670120 | 0.194373  |
| C | -1.211941 | 0.815216  | 0.003325  |
| C | 0.001758  | 1.472759  | -0.092155 |
| C | 1.213897  | 0.812327  | 0.003290  |
| C | 1.269313  | -0.673149 | 0.194400  |
| C | -0.001619 | -1.357184 | -0.327410 |
| H | -0.002886 | -2.414228 | -0.056089 |
| H | -0.001543 | -1.307736 | -1.419272 |
| H | 1.397519  | -0.901934 | 1.261986  |
| H | 2.151420  | -1.087820 | -0.300069 |
| H | 2.140012  | 1.370470  | -0.036080 |
| H | 0.003020  | 2.547855  | -0.231153 |
| H | -2.136708 | 1.375592  | -0.036047 |
| H | -2.154005 | -1.082653 | -0.300149 |
| H | -1.399736 | -0.898646 | 1.261941  |

== B3LYP/cc-pVTZ+d harmonic frequencies (cm<sup>-1</sup>) ==

|           |           |           |           |           |           |           |
|-----------|-----------|-----------|-----------|-----------|-----------|-----------|
| 181.9479  | 252.8795  | 433.0617  | 503.5292  | 516.4283  | 606.2741  | 695.2877  |
| 730.3359  | 833.1947  | 862.9551  | 890.0484  | 956.0233  | 966.2615  | 1017.2937 |
| 1056.1173 | 1063.7804 | 1138.9134 | 1146.1474 | 1164.7025 | 1217.9102 | 1271.5977 |
| 1345.9751 | 1361.7991 | 1371.5230 | 1403.6826 | 1450.0302 | 1476.2952 | 1479.3779 |
| 1495.3697 | 1514.5125 | 2954.3821 | 2955.7192 | 3019.9092 | 3033.4492 | 3040.1445 |
| 3063.4971 | 3142.5272 | 3168.1560 | 3177.1282 |           |           |           |

== Thermochemistry energies (hartree) ==

ZPVE = 0.130057 (after scaling by 0.985)  
W1 Ee = -234.057321 (total electronic energy)  
W1 U0 = -233.927263 (Zero-kelvin internal energy)

[ CCSDT-F12a/cc-pVDZ-F12 data ]

CCSD(T)-F12a/cc-pVDZ-F12 Ee = -233.640816 (total electronic energy)

## Species 2: ROO·

[ W1 data ]

== B3LYP/cc-pVTZ+d equilibrium geometry (Angstrom) ==

|   |           |           |           |
|---|-----------|-----------|-----------|
| C | -2.143523 | -0.296366 | -0.248241 |
| C | -1.626244 | 1.106064  | -0.109575 |
| C | -0.374439 | 1.406148  | 0.227564  |
| C | 0.645448  | 0.361421  | 0.551672  |
| C | 0.060998  | -1.034477 | 0.719939  |
| C | -1.011870 | -1.323667 | -0.329382 |
| H | -1.404954 | -2.332968 | -0.201763 |
| H | -0.558893 | -1.282580 | -1.322588 |
| H | -0.370013 | -1.097105 | 1.723392  |
| H | 0.874897  | -1.758364 | 0.678121  |
| H | -0.055204 | 2.438893  | 0.289131  |
| H | -2.329465 | 1.911264  | -0.292153 |
| H | -2.782586 | -0.360730 | -1.132434 |
| H | -2.800309 | -0.517476 | 0.602293  |
| O | 1.619649  | 0.367894  | -0.576597 |
| H | 1.239765  | 0.640911  | 1.421258  |
| O | 2.740918  | -0.237466 | -0.253043 |

== B3LYP/cc-pVTZ+d harmonic frequencies (cm<sup>-1</sup>) ==

|           |           |           |           |           |           |           |
|-----------|-----------|-----------|-----------|-----------|-----------|-----------|
| 76.0001   | 109.3942  | 216.5448  | 265.6829  | 340.9194  | 438.1198  | 455.6590  |
| 529.1480  | 567.5532  | 696.0192  | 738.0811  | 824.1990  | 832.2187  | 885.5125  |
| 905.1720  | 945.6874  | 1015.9000 | 1018.9935 | 1064.9139 | 1074.9161 | 1109.6045 |
| 1166.2429 | 1177.8565 | 1184.6488 | 1262.1925 | 1281.3140 | 1327.0037 | 1357.5983 |
| 1368.5749 | 1376.2787 | 1395.8683 | 1432.7734 | 1472.9319 | 1487.4254 | 1500.4707 |
| 1709.8220 | 2989.0206 | 3022.7491 | 3032.4098 | 3044.7428 | 3069.7347 | 3074.1628 |
| 3083.3531 | 3140.8394 | 3169.4221 |           |           |           |           |

== Thermochemistry energies (hartree) ==

ZPVE = 0.139661 (after scaling by 0.985)  
W1 Ee = -384.508858 (total electronic energy)  
W1 U0 = -384.369197 (Zero-kelvin internal energy)

[ CCSDT-F12a/cc-pVDZ-F12 data ]

CCSD(T)-F12a/cc-pVDZ-F12 Ee = -383.856462 (total electronic energy)

### Species 3: ·QOOH

[ W1 data ]

== B3LYP/cc-pVTZ+d equilibrium geometry (Angstrom) ==

|   |           |           |           |
|---|-----------|-----------|-----------|
| C | -2.269576 | -0.270483 | -0.096576 |
| C | -1.682249 | 1.110892  | -0.086820 |
| C | -0.401712 | 1.371823  | 0.158875  |
| C | 0.603526  | 0.310707  | 0.499210  |
| C | 0.021357  | -1.055141 | 0.539334  |
| C | -1.191467 | -1.354318 | -0.268318 |
| H | -1.592942 | -2.338914 | -0.026702 |
| H | -0.916926 | -1.386772 | -1.334196 |
| H | 0.589827  | -1.850166 | 1.001169  |
| H | -0.030725 | 2.388525  | 0.140653  |
| H | -2.359938 | 1.935364  | -0.279151 |
| H | -3.012008 | -0.350157 | -0.894120 |
| H | -2.817085 | -0.434646 | 0.838365  |
| O | 1.632009  | 0.442182  | -0.537671 |
| H | 1.101620  | 0.554259  | 1.441966  |
| O | 2.831816  | -0.216822 | -0.055204 |
| H | 2.848303  | -1.001250 | -0.619217 |

== B3LYP/cc-pVTZ+d harmonic frequencies (cm<sup>-1</sup>) ==

|           |           |           |           |           |           |           |
|-----------|-----------|-----------|-----------|-----------|-----------|-----------|
| 67.1887   | 117.2789  | 176.8257  | 240.7993  | 246.6007  | 297.5087  | 374.7432  |
| 452.4996  | 501.8589  | 553.0556  | 587.4548  | 716.5016  | 759.9715  | 837.6426  |
| 883.7487  | 896.8407  | 922.7228  | 959.1561  | 985.6141  | 1008.2566 | 1036.1460 |
| 1066.6177 | 1128.4758 | 1177.0111 | 1189.1308 | 1271.3026 | 1305.1606 | 1317.5783 |
| 1356.5852 | 1358.9750 | 1378.3950 | 1401.3927 | 1428.4045 | 1468.7809 | 1481.3135 |
| 1712.4954 | 2930.0516 | 3000.3835 | 3017.6831 | 3044.0254 | 3065.1211 | 3140.9802 |
| 3173.6311 | 3182.3496 | 3758.7556 |           |           |           |           |

== Thermochemistry energies (hartree) ==

ZPVE = 0.136832 (after scaling by 0.985)  
W1 Ee = -384.483308 (total electronic energy)  
W1 U0 = -384.346476 (Zero-kelvin internal energy)

[ CCSDT-F12a/cc-pVDZ-F12 data ]

CCSD(T)-F12a/cc-pVDZ-F12 Ee = -383.830386 (total electronic energy)

## Species 4: *cy*-ether

[ W1 data ]

== B3LYP/cc-pVTZ+d equilibrium geometry (Angstrom) ==

|   |           |           |           |
|---|-----------|-----------|-----------|
| C | -1.605525 | -0.558623 | 0.098808  |
| C | -1.372721 | 0.910958  | -0.128619 |
| C | -0.179572 | 1.485859  | -0.001383 |
| C | 1.010556  | 0.700217  | 0.402356  |
| C | 0.928872  | -0.762490 | 0.363199  |
| C | -0.350462 | -1.419947 | -0.127387 |
| H | -0.476049 | -2.390560 | 0.354813  |
| H | -0.228873 | -1.608485 | -1.195466 |
| H | -0.054794 | 2.548371  | -0.170250 |
| H | -2.233943 | 1.514663  | -0.391422 |
| H | -2.408910 | -0.908495 | -0.552258 |
| H | -1.979348 | -0.697344 | 1.120194  |
| O | 1.696453  | -0.054217 | -0.621508 |
| H | 1.684656  | 1.174652  | 1.109306  |
| H | 1.538754  | -1.334900 | 1.055303  |

== B3LYP/cc-pVTZ+d harmonic frequencies (cm<sup>-1</sup>) ==

|           |           |           |           |           |           |           |
|-----------|-----------|-----------|-----------|-----------|-----------|-----------|
| 110.8949  | 251.9600  | 396.5646  | 485.1589  | 504.2510  | 542.6020  | 712.7121  |
| 760.7092  | 789.7555  | 821.3025  | 867.1795  | 938.3363  | 963.6737  | 976.4022  |
| 1005.6381 | 1048.4479 | 1060.7655 | 1090.3557 | 1152.3957 | 1197.3324 | 1219.0463 |
| 1274.4125 | 1286.8170 | 1348.1525 | 1359.2491 | 1395.9813 | 1427.8540 | 1458.9387 |
| 1478.9254 | 1487.5854 | 1705.5101 | 2992.9448 | 3037.3061 | 3052.6807 | 3075.4345 |
| 3104.4803 | 3115.0507 | 3142.7394 | 3167.5092 |           |           |           |

== Thermochemistry energies (hartree) ==

ZPVE = 0.125231 (after scaling by 0.985)  
W1 Ee = -308.722842 (total electronic energy)  
W1 U0 = -308.597611 (Zero-kelvin internal energy)

[ CCSDT-F12a/cc-pVDZ-F12 data ]

CCSD(T)-F12a/cc-pVDZ-F12 Ee = -308.188411 (total electronic energy)



## Species 5: alkene

[ W1 data ]

== B3LYP/cc-pVTZ+d equilibrium geometry (Angstrom) ==

|   |           |           |           |
|---|-----------|-----------|-----------|
| C | -1.190453 | -0.728182 | -0.241210 |
| C | 0.113603  | -1.419299 | 0.063434  |
| C | 1.254089  | -0.723538 | 0.106387  |
| C | 1.254089  | 0.723538  | -0.106387 |
| C | 0.113603  | 1.419299  | -0.063434 |
| C | -1.190453 | 0.728182  | 0.241210  |
| H | -2.028422 | 1.269349  | -0.200715 |
| H | -1.351022 | 0.756441  | 1.327964  |
| H | 0.117014  | 2.495348  | -0.184809 |
| H | 2.198996  | -1.223417 | 0.278247  |
| H | 0.117013  | -2.495348 | 0.184809  |
| H | -2.028422 | -1.269349 | 0.200715  |
| H | -1.351022 | -0.756441 | -1.327964 |
| H | 2.198996  | 1.223417  | -0.278247 |

== B3LYP/cc-pVTZ+d harmonic frequencies (cm<sup>-1</sup>) ==

|           |           |           |           |           |           |           |
|-----------|-----------|-----------|-----------|-----------|-----------|-----------|
| 192.8098  | 302.3568  | 481.7906  | 523.8932  | 574.1460  | 674.6680  | 764.4143  |
| 781.3944  | 853.3941  | 930.4329  | 963.3190  | 981.5269  | 996.0674  | 1015.2611 |
| 1046.6052 | 1069.1296 | 1175.3067 | 1191.3360 | 1205.2056 | 1269.4904 | 1359.6232 |
| 1363.2187 | 1405.9565 | 1443.7607 | 1471.7013 | 1482.0943 | 1637.3882 | 1703.4535 |
| 2957.5285 | 2971.0729 | 3057.7442 | 3058.6910 | 3148.6677 | 3155.3902 | 3170.1798 |
| 3179.4596 |           |           |           |           |           |           |

== Thermochemistry energies (hartree) ==

ZPVE = 0.120185 (after scaling by 0.985)  
W1 Ee = -233.474518 (total electronic energy)  
W1 U0 = -233.354333 (Zero-kelvin internal energy)

[ CCSDT-F12a/cc-pVDZ-F12 data ]

CCSD(T)-F12a/cc-pVDZ-F12 Ee = -233.058055 (total electronic energy)

Species 6: Transition state along  $\text{ROO} \cdot \xrightarrow{\text{TS1}} \cdot\text{QOOH}$

[ W1 data ]

== B3LYP/cc-pVTZ+d equilibrium geometry (Angstrom) ==

|   |           |           |           |
|---|-----------|-----------|-----------|
| C | -2.030809 | -0.573900 | -0.158577 |
| C | -1.766664 | 0.904443  | -0.142938 |
| C | -0.585019 | 1.449468  | 0.137518  |
| C | 0.606261  | 0.625806  | 0.513538  |
| C | 0.291000  | -0.858085 | 0.710485  |
| C | -0.727351 | -1.397498 | -0.251784 |
| H | -0.930928 | -2.452159 | -0.068235 |
| H | -0.342618 | -1.302824 | -1.269944 |
| H | 0.202073  | -1.191302 | 1.741654  |
| H | 1.569264  | -1.096464 | 0.287453  |
| H | -0.459078 | 2.525020  | 0.127670  |
| H | -2.605473 | 1.552933  | -0.370628 |
| H | -2.682138 | -0.821716 | -1.000144 |
| H | -2.589181 | -0.851890 | 0.742359  |
| O | 1.561521  | 0.636275  | -0.575806 |
| H | 1.097259  | 1.021835  | 1.407694  |
| O | 2.440518  | -0.421879 | -0.230110 |

== B3LYP/cc-pVTZ+d harmonic frequencies (cm<sup>-1</sup>) ==

|            |           |           |           |           |           |           |
|------------|-----------|-----------|-----------|-----------|-----------|-----------|
| -2159.9649 | 114.2653  | 192.5710  | 244.2835  | 289.2540  | 429.1863  | 461.1906  |
| 521.9295   | 586.8638  | 677.9427  | 728.0027  | 744.1971  | 825.2366  | 850.4932  |
| 883.2391   | 920.3935  | 943.4556  | 972.3340  | 992.3649  | 1010.9271 | 1050.6843 |
| 1071.3579  | 1106.8958 | 1137.6790 | 1172.7863 | 1218.7674 | 1257.0187 | 1309.8600 |
| 1321.2501  | 1354.0180 | 1368.1685 | 1394.1768 | 1423.3472 | 1476.0250 | 1492.3647 |
| 1701.3982  | 1717.0308 | 3001.3496 | 3013.1543 | 3030.8031 | 3047.2850 | 3082.1471 |
| 3113.4017  | 3141.3124 | 3168.1794 |           |           |           |           |

== Thermochemistry energies (hartree) ==

ZPVE = 0.133649 (after scaling by 0.985)  
W1 Ee = -384.450007 (total electronic energy)  
W1 U0 = -384.316359 (Zero-kelvin internal energy)

[ CCSDT-F12a/cc-pVDZ-F12 data ]

CCSD(T)-F12a/cc-pVDZ-F12 Ee = -383.797757 (total electronic energy)

Species 8: Transition state along  $\text{ROO}\cdot \xrightarrow{\text{TS}_2} \text{alkene} + \cdot\text{OOH}$

[ W1 data ]

== B3LYP/cc-pVTZ+d equilibrium geometry (Angstrom) ==

|   |           |           |           |
|---|-----------|-----------|-----------|
| C | -2.125361 | -0.435280 | -0.277739 |
| C | -1.694591 | 0.998372  | -0.415041 |
| C | -0.557272 | 1.443838  | 0.139189  |
| C | 0.262574  | 0.549435  | 0.923548  |
| C | 0.154154  | -0.834316 | 0.795816  |
| C | -0.922849 | -1.376570 | -0.153408 |
| H | -1.247129 | -2.362984 | 0.177272  |
| H | -0.488959 | -1.512423 | -1.148261 |
| H | 0.394519  | -1.429736 | 1.673367  |
| H | 1.286952  | -0.977118 | 0.142258  |
| H | -0.275978 | 2.486035  | 0.070720  |
| H | -2.351750 | 1.687781  | -0.931091 |
| H | -2.738158 | -0.728497 | -1.131968 |
| H | -2.779015 | -0.519168 | 0.600559  |
| O | 2.239223  | 0.649215  | -0.371979 |
| H | 0.877480  | 0.972155  | 1.705274  |
| O | 2.338541  | -0.610330 | -0.532060 |

== B3LYP/cc-pVTZ+d harmonic frequencies (cm<sup>-1</sup>) ==

|            |           |           |           |           |           |           |
|------------|-----------|-----------|-----------|-----------|-----------|-----------|
| -1078.2646 | 97.5341   | 126.8272  | 177.6611  | 210.5703  | 286.0263  | 399.9607  |
| 497.8871   | 528.7688  | 586.5982  | 656.0732  | 723.0531  | 762.6606  | 845.8168  |
| 850.8196   | 924.3539  | 963.8049  | 993.4353  | 997.1791  | 1007.4732 | 1063.5988 |
| 1072.7155  | 1175.6094 | 1187.2790 | 1221.4283 | 1261.9647 | 1294.7437 | 1318.9657 |
| 1357.7863  | 1365.5877 | 1399.3008 | 1438.3204 | 1472.6538 | 1492.5637 | 1534.1243 |
| 1562.9257  | 1657.0727 | 2976.5881 | 3015.1670 | 3057.2926 | 3074.1742 | 3105.5866 |
| 3156.7515  | 3179.6747 | 3193.4490 |           |           |           |           |

== Thermochemistry energies (hartree) ==

ZPVE = 0.133006 (after scaling by 0.985)  
W1 Ee = -384.455687 (total electronic energy)  
W1 U0 = -384.322681 (Zero-kelvin internal energy)

[ CCSDT-F12a/cc-pVDZ-F12 data ]

CCSD(T)-F12a/cc-pVDZ-F12 Ee = -383.803165 (total electronic energy)

Species 8: Transition state along  $\cdot\text{QOOH} \xrightarrow{\text{TS}_3} \text{alkene} + \cdot\text{OOH}$

[ W1 data ]

== B3LYP/cc-pVTZ+d equilibrium geometry (Angstrom) ==

|   |           |           |           |
|---|-----------|-----------|-----------|
| C | -2.299070 | -0.196085 | -0.213970 |
| C | -1.655256 | 1.161478  | -0.165435 |
| C | -0.408862 | 1.347724  | 0.272420  |
| C | 0.416180  | 0.224073  | 0.732710  |
| C | -0.094132 | -1.062846 | 0.625645  |
| C | -1.261076 | -1.328111 | -0.270785 |
| H | -1.724158 | -2.287033 | -0.035462 |
| H | -0.889539 | -1.411158 | -1.302161 |
| H | 0.436548  | -1.891691 | 1.074707  |
| H | 3.135750  | -0.968796 | -0.441634 |
| H | 0.027237  | 2.336439  | 0.307418  |
| H | -2.253785 | 2.013515  | -0.465524 |
| H | -2.969641 | -0.263827 | -1.072610 |
| H | -2.936286 | -0.314311 | 0.671643  |
| O | 1.736237  | 0.255144  | -0.649838 |
| H | 1.158986  | 0.430365  | 1.490083  |
| O | 2.992287  | -0.070256 | -0.113908 |

== B3LYP/cc-pVTZ+d harmonic frequencies (cm<sup>-1</sup>) ==

|           |           |           |           |           |           |           |
|-----------|-----------|-----------|-----------|-----------|-----------|-----------|
| -479.1690 | 65.6313   | 94.3683   | 156.8542  | 209.4955  | 262.7825  | 330.1102  |
| 401.8430  | 488.7220  | 494.3236  | 570.6013  | 681.8319  | 737.1496  | 772.0551  |
| 850.3111  | 920.4002  | 943.4608  | 956.6538  | 997.3871  | 1003.3371 | 1033.2789 |
| 1044.1860 | 1071.9139 | 1168.9090 | 1185.6612 | 1193.0659 | 1271.6017 | 1337.8422 |
| 1362.7851 | 1366.8863 | 1407.9550 | 1441.6654 | 1464.5955 | 1479.9433 | 1489.9663 |
| 1690.4307 | 2955.4688 | 2984.0717 | 3053.4172 | 3064.1140 | 3151.9431 | 3167.8138 |
| 3180.8024 | 3190.1657 | 3725.4775 |           |           |           |           |

== Thermochemistry energies (hartree) ==

ZPVE = 0.135585 (after scaling by 0.985)  
W1 Ee = -384.459553 (total electronic energy)  
W1 U0 = -384.323967 (Zero-kelvin internal energy)

[ CCSDT-F12a/cc-pVDZ-F12 data ]

CCSD(T)-F12a/cc-pVDZ-F12 Ee = -383.806844 (total electronic energy)

Species 9: Transition state along  $\cdot\text{QOOH} \xrightarrow{\text{TS4}} \text{cycloether} + \cdot\text{OH}$

[ W1 data ]

== B3LYP/cc-pVTZ+d equilibrium geometry (Angstrom) ==

|   |           |           |           |
|---|-----------|-----------|-----------|
| C | -2.223899 | 0.161868  | -0.227947 |
| C | -1.325821 | 1.361280  | -0.090856 |
| C | -0.060527 | 1.293214  | 0.310697  |
| C | 0.581099  | 0.000536  | 0.707352  |
| C | -0.263813 | -1.195963 | 0.550404  |
| C | -1.436726 | -1.156505 | -0.359892 |
| H | -2.082505 | -2.018631 | -0.187519 |
| H | -1.074157 | -1.243494 | -1.390655 |
| H | 0.025257  | -2.102103 | 1.059660  |
| H | 3.433501  | -0.412408 | -0.342145 |
| H | 0.558310  | 2.178680  | 0.366847  |
| H | -1.756256 | 2.324272  | -0.341334 |
| H | -2.869798 | 0.285222  | -1.099595 |
| H | -2.898025 | 0.109307  | 0.633967  |
| O | 1.386772  | -0.605026 | -0.275917 |
| H | 1.102364  | 0.078849  | 1.665261  |
| O | 2.855656  | 0.356741  | -0.436963 |

== B3LYP/cc-pVTZ+d harmonic frequencies (cm<sup>-1</sup>) ==

|           |           |           |           |           |           |           |
|-----------|-----------|-----------|-----------|-----------|-----------|-----------|
| -692.9884 | 77.6399   | 123.9571  | 148.2492  | 171.6387  | 263.1074  | 286.3824  |
| 391.8943  | 491.0862  | 514.7627  | 548.4615  | 682.2424  | 740.2509  | 758.9012  |
| 836.1047  | 890.1370  | 927.4350  | 939.2235  | 982.8791  | 1003.2165 | 1012.1423 |
| 1024.6623 | 1062.7242 | 1142.6279 | 1181.0295 | 1187.5187 | 1268.6737 | 1280.3931 |
| 1322.3762 | 1358.8797 | 1400.2520 | 1413.1941 | 1427.0980 | 1461.0656 | 1485.9193 |
| 1711.5802 | 2994.3368 | 3004.9032 | 3021.6573 | 3051.4205 | 3065.4767 | 3144.4631 |
| 3183.3964 | 3212.2372 | 3783.4494 |           |           |           |           |

== Thermochemistry energies (hartree) ==

ZPVE = 0.134592 (after scaling by 0.985)  
W1 Ee = -384.460885 (total electronic energy)  
W1 U0 = -384.326292 (Zero-kelvin internal energy)

[ CCSDT-F12a/cc-pVDZ-F12 data ]

CCSD(T)-F12a/cc-pVDZ-F12 Ee = -383.808512 (total electronic energy)

# Hydrocarbon 8: cyclohexadienyl

## Species 1: ·R

[ W1 data ]

== B3LYP/cc-pVTZ+d equilibrium geometry (Angstrom) ==

|   |           |           |           |
|---|-----------|-----------|-----------|
| C | -0.737889 | 1.221604  | -0.000038 |
| C | -1.450248 | 0.000031  | -0.000067 |
| C | -0.737926 | -1.221599 | -0.000028 |
| C | 0.621460  | -1.251915 | 0.000036  |
| C | 1.443130  | -0.000017 | 0.000064  |
| C | 0.621497  | 1.251898  | 0.000024  |
| H | 2.130147  | -0.000036 | -0.862556 |
| H | 2.130077  | -0.000027 | 0.862740  |
| H | 1.146183  | -2.198753 | 0.000065  |
| H | -1.291116 | -2.152801 | -0.000050 |
| H | -2.530657 | 0.000054  | -0.000118 |
| H | 1.146249  | 2.198707  | 0.000045  |
| H | -1.291031 | 2.152836  | -0.000066 |

== B3LYP/cc-pVTZ+d harmonic frequencies (cm<sup>-1</sup>) ==

|           |           |           |           |           |           |           |
|-----------|-----------|-----------|-----------|-----------|-----------|-----------|
| 176.0298  | 387.1752  | 530.6199  | 567.3433  | 595.0751  | 637.9271  | 730.5061  |
| 778.3793  | 870.6522  | 937.4595  | 968.2708  | 975.7039  | 981.1546  | 989.0958  |
| 1002.7897 | 1111.3566 | 1172.9426 | 1181.5453 | 1200.5367 | 1308.1508 | 1375.8194 |
| 1419.3486 | 1436.2672 | 1461.7327 | 1548.2440 | 1611.6555 | 2898.3662 | 2917.0645 |
| 3151.0892 | 3153.2749 | 3171.2412 | 3172.2629 | 3195.2074 |           |           |

== Thermochemistry energies (hartree) ==

ZPVE = 0.106846 (after scaling by 0.985)  
W1 Ee = -232.842303 (total electronic energy)  
W1 U0 = -232.735457 (Zero-kelvin internal energy)

[ CCSDT-F12a/cc-pVDZ-F12 data ]

CCSD(T)-F12a/cc-pVDZ-F12 Ee = -232.425751 (total electronic energy)

## Species 2: ROO·

[ W1 data ]

== B3LYP/cc-pVTZ+d equilibrium geometry (Angstrom) ==

|   |           |           |           |
|---|-----------|-----------|-----------|
| C | 1.956865  | 0.346859  | -0.518726 |
| C | 1.645193  | -1.028658 | -0.148662 |
| C | 0.474853  | -1.363847 | 0.407190  |
| C | -0.583171 | -0.330359 | 0.610632  |
| C | -0.050841 | 1.093203  | 0.707940  |
| C | 1.164037  | 1.350083  | -0.131338 |
| H | 0.200104  | 1.292701  | 1.757759  |
| H | -0.865296 | 1.778180  | 0.465905  |
| H | 0.242576  | -2.390223 | 0.654831  |
| H | 2.389706  | -1.791640 | -0.338855 |
| O | -1.490077 | -0.452921 | -0.583589 |
| H | -1.231379 | -0.554826 | 1.454818  |
| O | -2.589509 | 0.246342  | -0.427325 |
| H | 1.406020  | 2.376141  | -0.376396 |
| H | 2.853345  | 0.538614  | -1.092958 |

== B3LYP/cc-pVTZ+d harmonic frequencies (cm<sup>-1</sup>) ==

|           |           |           |           |           |           |           |
|-----------|-----------|-----------|-----------|-----------|-----------|-----------|
| 77.5007   | 123.8378  | 212.1933  | 312.2362  | 379.4636  | 467.5307  | 513.7466  |
| 593.3316  | 613.9147  | 664.2412  | 780.2658  | 803.9229  | 851.4722  | 951.8753  |
| 964.5986  | 976.8052  | 997.0837  | 1007.5129 | 1016.2330 | 1102.6011 | 1180.4663 |
| 1181.8199 | 1209.7835 | 1222.3361 | 1321.8164 | 1340.0181 | 1369.3630 | 1417.7412 |
| 1449.1206 | 1455.5894 | 1632.3970 | 1708.5379 | 2989.5011 | 3067.7671 | 3091.3215 |
| 3158.8490 | 3166.8211 | 3184.3193 | 3190.6602 |           |           |           |

== Thermochemistry energies (hartree) ==

ZPVE = 0.116124 (after scaling by 0.985)  
W1 Ee = -383.279971 (total electronic energy)  
W1 U0 = -383.163847 (Zero-kelvin internal energy)

[ CCSDT-F12a/cc-pVDZ-F12 data ]

CCSD(T)-F12a/cc-pVDZ-F12 Ee = -382.627788 (total electronic energy)

### Species 3: ·QOOH

[ W1 data ]

== B3LYP/cc-pVTZ+d equilibrium geometry (Angstrom) ==

|   |           |           |           |
|---|-----------|-----------|-----------|
| C | 2.224674  | 0.297077  | -0.240221 |
| C | 1.777279  | -1.034396 | -0.093365 |
| C | 0.488253  | -1.316405 | 0.235847  |
| C | -0.521703 | -0.240470 | 0.461840  |
| C | 0.025238  | 1.140450  | 0.296675  |
| C | 1.322809  | 1.366364  | -0.042275 |
| H | -0.660488 | 1.961840  | 0.453300  |
| H | 0.143445  | -2.336356 | 0.334018  |
| H | 2.477762  | -1.845669 | -0.245703 |
| O | -1.597659 | -0.521667 | -0.485234 |
| H | -0.977684 | -0.352737 | 1.455528  |
| O | -2.768974 | 0.219996  | -0.045508 |
| H | -2.876867 | 0.831415  | -0.785842 |
| H | 3.251400  | 0.496563  | -0.511848 |
| H | 1.676194  | 2.382593  | -0.164520 |

== B3LYP/cc-pVTZ+d harmonic frequencies (cm<sup>-1</sup>) ==

|           |           |           |           |           |           |           |
|-----------|-----------|-----------|-----------|-----------|-----------|-----------|
| 79.2374   | 122.2077  | 233.2789  | 246.1991  | 368.3294  | 384.8999  | 451.4580  |
| 566.4050  | 589.2951  | 620.1657  | 689.6509  | 758.9581  | 820.7487  | 881.0823  |
| 916.7612  | 921.0026  | 980.8896  | 986.0679  | 995.0809  | 1010.7220 | 1042.5649 |
| 1124.7775 | 1171.1189 | 1196.3741 | 1294.9448 | 1315.1023 | 1358.9225 | 1367.2804 |
| 1420.9243 | 1457.2428 | 1548.1899 | 1599.4366 | 2947.6646 | 3158.4139 | 3163.7171 |
| 3184.6960 | 3188.5850 | 3197.0912 | 3764.0579 |           |           |           |

== Thermochemistry energies (hartree) ==

ZPVE = 0.114721 (after scaling by 0.985)  
W1 Ee = -383.290912 (total electronic energy)  
W1 U0 = -383.176191 (Zero-kelvin internal energy)

[ CCSDT-F12a/cc-pVDZ-F12 data ]

CCSD(T)-F12a/cc-pVDZ-F12 Ee = -382.638077 (total electronic energy)



### Species 4: *cy*-ether

[ W1 data ]

== B3LYP/cc-pVTZ+d equilibrium geometry (Angstrom) ==

|   |           |           |           |
|---|-----------|-----------|-----------|
| C | -1.433779 | 0.722586  | 0.125465  |
| C | -1.433779 | -0.722586 | 0.125465  |
| C | -0.326795 | -1.426679 | -0.179528 |
| C | 0.967023  | -0.756897 | -0.321931 |
| C | 0.967023  | 0.756897  | -0.321931 |
| C | -0.326795 | 1.426679  | -0.179528 |
| H | -0.376011 | -2.493879 | -0.351591 |
| H | -2.377087 | -1.233908 | 0.267104  |
| O | 1.439253  | -0.000000 | 0.797719  |
| H | 1.757388  | -1.278911 | -0.850431 |
| H | 1.757389  | 1.278910  | -0.850431 |
| H | -0.376011 | 2.493879  | -0.351591 |
| H | -2.377087 | 1.233909  | 0.267104  |

== B3LYP/cc-pVTZ+d harmonic frequencies (cm<sup>-1</sup>) ==

|           |           |           |           |           |           |           |
|-----------|-----------|-----------|-----------|-----------|-----------|-----------|
| 254.5645  | 319.6290  | 464.0374  | 544.0407  | 617.7931  | 641.4945  | 700.2252  |
| 776.4804  | 778.8320  | 848.4227  | 937.1743  | 978.9011  | 980.7757  | 985.0101  |
| 998.5682  | 1011.0676 | 1060.3064 | 1139.2626 | 1191.0942 | 1207.9378 | 1254.7997 |
| 1368.2575 | 1377.9465 | 1428.8727 | 1468.0560 | 1598.8930 | 1683.8256 | 3120.4087 |
| 3128.7354 | 3158.2146 | 3167.1955 | 3179.4352 | 3187.3396 |           |           |

== Thermochemistry energies (hartree) ==

ZPVE = 0.102231 (after scaling by 0.985)  
W1 Ee = -307.503749 (total electronic energy)  
W1 U0 = -307.401518 (Zero-kelvin internal energy)

[ CCSDT-F12a/cc-pVDZ-F12 data ]

CCSD(T)-F12a/cc-pVDZ-F12 Ee = -306.969394 (total electronic energy)

## Species 5: alkene

[ W1 data ]

== B3LYP/cc-pVTZ+d equilibrium geometry (Angstrom) ==

|   |           |           |           |
|---|-----------|-----------|-----------|
| C | 1.204275  | 0.000000  | 0.695286  |
| C | 0.000000  | 0.000000  | 1.390572  |
| C | -1.204275 | -0.000000 | 0.695286  |
| C | -1.204275 | 0.000000  | -0.695286 |
| C | 0.000000  | 0.000000  | -1.390572 |
| C | 1.204275  | -0.000000 | -0.695286 |
| H | -0.000000 | -0.000000 | -2.472631 |
| H | -2.141364 | -0.000000 | 1.236319  |
| H | -0.000000 | -0.000000 | 2.472631  |
| H | -2.141364 | 0.000000  | -1.236319 |
| H | 2.141364  | 0.000000  | 1.236319  |
| H | 2.141364  | -0.000000 | -1.236319 |

== B3LYP/cc-pVTZ+d harmonic frequencies (cm<sup>-1</sup>) ==

|           |           |           |           |           |           |           |
|-----------|-----------|-----------|-----------|-----------|-----------|-----------|
| 414.2583  | 414.2664  | 624.2435  | 624.2601  | 691.3378  | 726.8158  | 867.7603  |
| 867.8529  | 988.7645  | 988.8385  | 1015.7570 | 1022.1306 | 1030.6246 | 1062.5109 |
| 1062.5212 | 1176.7232 | 1200.5782 | 1200.6070 | 1336.0266 | 1389.9919 | 1519.1495 |
| 1519.1555 | 1638.0856 | 1638.1330 | 3156.6715 | 3166.4396 | 3166.4962 | 3182.1573 |
| 3182.2164 | 3192.2781 |           |           |           |           |           |

== Thermochemistry energies (hartree) ==

ZPVE = 0.098885 (after scaling by 0.985)  
W1 Ee = -232.300335 (total electronic energy)  
W1 U0 = -232.201450 (Zero-kelvin internal energy)

[ CCSDT-F12a/cc-pVDZ-F12 data ]

CCSD(T)-F12a/cc-pVDZ-F12 Ee = -231.883433 (total electronic energy)

Species 6: Transition state along  $\text{ROO} \cdot \xrightarrow{\text{TS1}} \cdot\text{QOOH}$

[ W1 data ]

== B3LYP/cc-pVTZ+d equilibrium geometry (Angstrom) ==

|   |           |           |           |
|---|-----------|-----------|-----------|
| C | 2.039109  | -0.170311 | 0.264779  |
| C | 1.459844  | 1.148259  | 0.238985  |
| C | 0.210315  | 1.358437  | -0.208726 |
| C | -0.663977 | 0.250077  | -0.742509 |
| C | -0.094025 | -1.147665 | -0.388138 |
| C | 1.294520  | -1.264931 | -0.068494 |
| H | -0.527346 | -1.965046 | -0.959297 |
| H | -0.821505 | -1.095132 | 0.674189  |
| H | -0.222812 | 2.350635  | -0.217540 |
| H | 2.059142  | 1.982964  | 0.579788  |
| O | -1.928004 | 0.251190  | -0.233245 |
| H | -0.788689 | 0.385322  | -1.825738 |
| O | -1.821466 | -0.272379 | 1.067373  |
| H | 1.746741  | -2.248614 | -0.051809 |
| H | 3.075517  | -0.283816 | 0.551998  |

== B3LYP/cc-pVTZ+d harmonic frequencies (cm<sup>-1</sup>) ==

|            |           |           |           |           |           |           |
|------------|-----------|-----------|-----------|-----------|-----------|-----------|
| -2046.9106 | 66.3417   | 191.2526  | 342.8088  | 397.4710  | 486.1543  | 503.9823  |
| 585.9483   | 647.1014  | 661.5381  | 746.1241  | 791.7509  | 827.0686  | 891.1354  |
| 933.3106   | 974.1660  | 980.6267  | 989.1944  | 1008.3676 | 1034.0094 | 1099.7406 |
| 1165.1320  | 1178.2550 | 1198.5344 | 1244.5535 | 1278.5771 | 1354.4702 | 1371.4373 |
| 1422.8318  | 1475.1149 | 1512.5722 | 1649.2854 | 1732.9508 | 2968.6544 | 3110.8531 |
| 3158.3046  | 3165.1891 | 3178.3776 | 3190.1904 |           |           |           |

== Thermochemistry energies (hartree) ==

ZPVE = 0.111108 (after scaling by 0.985)  
W1 Ee = -383.230050 (total electronic energy)  
W1 U0 = -383.118942 (Zero-kelvin internal energy)

[ CCSDT-F12a/cc-pVDZ-F12 data ]

CCSD(T)-F12a/cc-pVDZ-F12 Ee = -382.577607 (total electronic energy)

Species 7: Transition state along  $\text{ROO}\cdot \xrightarrow{\text{TS}_2} \text{alkene} + \cdot\text{OOH}$

[ W1 data ]

== B3LYP/cc-pVTZ+d equilibrium geometry (Angstrom) ==

|   |           |           |           |
|---|-----------|-----------|-----------|
| C | -1.916263 | -0.540440 | -0.585835 |
| C | -1.743770 | 0.865041  | -0.493914 |
| C | -0.738017 | 1.405880  | 0.288329  |
| C | 0.154272  | 0.581742  | 0.960337  |
| C | 0.075390  | -0.871782 | 0.825275  |
| C | -1.080725 | -1.381086 | 0.076909  |
| H | 0.282558  | -1.420148 | 1.748245  |
| H | 1.030694  | -1.132813 | 0.206047  |
| H | -0.652106 | 2.479456  | 0.388828  |
| H | -2.429195 | 1.518692  | -1.016262 |
| O | 2.179351  | 0.649136  | -0.441894 |
| H | 0.859653  | 1.004142  | 1.658652  |
| O | 2.366327  | -0.576291 | -0.591716 |
| H | -1.225218 | -2.452312 | 0.025982  |
| H | -2.737132 | -0.935910 | -1.169208 |

== B3LYP/cc-pVTZ+d harmonic frequencies (cm<sup>-1</sup>) ==

|           |           |           |           |           |           |           |
|-----------|-----------|-----------|-----------|-----------|-----------|-----------|
| -329.8489 | 77.4220   | 111.1944  | 123.1083  | 236.6692  | 374.8175  | 432.6514  |
| 582.8818  | 592.9938  | 605.4823  | 687.3251  | 799.9340  | 829.5936  | 894.2920  |
| 926.9943  | 981.3280  | 999.5739  | 1005.8484 | 1015.4647 | 1019.3672 | 1111.3980 |
| 1163.8324 | 1183.9519 | 1205.3364 | 1341.1150 | 1356.6363 | 1377.5680 | 1406.7579 |
| 1459.2391 | 1483.3767 | 1544.1480 | 1620.2798 | 2047.3851 | 3035.6460 | 3164.0595 |
| 3172.3181 | 3182.2871 | 3191.7973 | 3212.6344 |           |           |           |

== Thermochemistry energies (hartree) ==

ZPVE = 0.111205 (after scaling by 0.985)  
W1 Ee = -383.255832 (total electronic energy)  
W1 U0 = -383.144627 (Zero-kelvin internal energy)

[ CCSDT-F12a/cc-pVDZ-F12 data ]

CCSD(T)-F12a/cc-pVDZ-F12 Ee = -382.604858 (total electronic energy)

Species 8: Transition state along  $\cdot\text{QOOH} \xrightarrow{\text{TS}_3} \text{alkene} + \cdot\text{OOH}$

[ W1 data ]

== B3LYP/cc-pVTZ+d equilibrium geometry (Angstrom) ==

|   |           |           |           |
|---|-----------|-----------|-----------|
| C | 2.125538  | 0.317637  | -0.439337 |
| C | 1.753148  | -1.013855 | -0.192889 |
| C | 0.551413  | -1.304265 | 0.400823  |
| C | -0.388931 | -0.257113 | 0.701808  |
| C | 0.071230  | 1.096344  | 0.545220  |
| C | 1.280295  | 1.364514  | -0.051183 |
| H | -0.575937 | 1.902832  | 0.862965  |
| H | 0.265764  | -2.327483 | 0.600119  |
| H | 2.431758  | -1.814259 | -0.457002 |
| O | -1.608256 | -0.477850 | -0.596988 |
| H | -1.107861 | -0.448549 | 1.487497  |
| O | -2.802062 | 0.170289  | -0.210945 |
| H | -2.752171 | 1.004793  | -0.697993 |
| H | 3.074573  | 0.534362  | -0.910113 |
| H | 1.590261  | 2.389220  | -0.208657 |

== B3LYP/cc-pVTZ+d harmonic frequencies (cm<sup>-1</sup>) ==

|           |           |           |           |           |           |           |
|-----------|-----------|-----------|-----------|-----------|-----------|-----------|
| -560.2710 | 63.9930   | 121.1052  | 178.6775  | 321.9084  | 383.9804  | 405.0602  |
| 421.8122  | 604.0396  | 607.5185  | 654.1512  | 721.0996  | 810.5345  | 881.2507  |
| 918.7992  | 952.3258  | 981.7518  | 995.4800  | 1020.9738 | 1023.2535 | 1050.5258 |
| 1103.8248 | 1165.2621 | 1176.3980 | 1198.5862 | 1326.6038 | 1364.9434 | 1381.5530 |
| 1478.2204 | 1487.3568 | 1558.1038 | 1597.8141 | 3152.7484 | 3164.1465 | 3169.4935 |
| 3181.9021 | 3189.5294 | 3196.1885 | 3723.3766 |           |           |           |

== Thermochemistry energies (hartree) ==

ZPVE = 0.113847 (after scaling by 0.985)  
W1 Ee = -383.274905 (total electronic energy)  
W1 U0 = -383.161057 (Zero-kelvin internal energy)

[ CCSDT-F12a/cc-pVDZ-F12 data ]

CCSD(T)-F12a/cc-pVDZ-F12 Ee = -382.622302 (total electronic energy)

Species 9: Transition state along  $\cdot\text{QOOH} \xrightarrow{\text{TS4}} \text{cycloether} + \cdot\text{OH}$

[ W1 data ]

== B3LYP/cc-pVTZ+d equilibrium geometry (Angstrom) ==

|   |           |           |           |
|---|-----------|-----------|-----------|
| C | 1.971223  | 0.271571  | -0.534941 |
| C | 1.599369  | -1.020813 | -0.254460 |
| C | 0.423075  | -1.278747 | 0.463847  |
| C | -0.501938 | -0.168307 | 0.813278  |
| C | 0.055888  | 1.201676  | 0.619782  |
| C | 1.200782  | 1.387301  | -0.067711 |
| H | -0.498646 | 2.036417  | 1.024495  |
| H | 0.153516  | -2.276369 | 0.769331  |
| H | 2.222843  | -1.848009 | -0.565452 |
| O | -1.163651 | -0.700903 | -0.310159 |
| H | -1.080550 | -0.281396 | 1.730889  |
| O | -2.733639 | 0.295262  | -0.493029 |
| H | -2.567442 | 0.412720  | -1.438848 |
| H | 2.881688  | 0.459266  | -1.088300 |
| H | 1.576515  | 2.386413  | -0.245391 |

== B3LYP/cc-pVTZ+d harmonic frequencies (cm<sup>-1</sup>) ==

|           |           |           |           |           |           |           |
|-----------|-----------|-----------|-----------|-----------|-----------|-----------|
| -686.0759 | 72.5454   | 130.9785  | 169.8612  | 211.1387  | 296.3470  | 357.7189  |
| 451.5503  | 574.5507  | 587.7637  | 622.9115  | 733.6244  | 779.9857  | 808.7352  |
| 858.0155  | 910.7056  | 946.1703  | 972.8360  | 992.2048  | 998.1940  | 1003.4736 |
| 1046.5849 | 1147.8120 | 1181.8960 | 1191.5369 | 1271.1764 | 1335.9466 | 1376.7738 |
| 1432.4006 | 1474.9238 | 1521.7076 | 1641.6560 | 3053.1215 | 3165.0514 | 3174.8370 |
| 3189.0533 | 3197.5062 | 3228.6068 | 3776.5610 |           |           |           |

== Thermochemistry energies (hartree) ==

ZPVE = 0.111945 (after scaling by 0.985)  
W1 Ee = -383.252212 (total electronic energy)  
W1 U0 = -383.140267 (Zero-kelvin internal energy)

[ CCSDT-F12a/cc-pVDZ-F12 data ]

CCSD(T)-F12a/cc-pVDZ-F12 Ee = -382.600630 (total electronic energy)

# G4-level equilibrium geometry, harmonic frequencies, and thermochemistry energies of different reaction species involved in combustion reaction of R.

## Hydrocarbon 1: ethyl

### Species 1: ·R

[ G4 data ]

== B3LYP/6-31G(2df,p) equilibrium geometry (Angstrom) ==

|   |           |           |           |
|---|-----------|-----------|-----------|
| C | -0.693143 | 0.000000  | -0.001240 |
| C | 0.794299  | 0.000000  | -0.022046 |
| H | -1.108801 | 0.886739  | -0.492488 |
| H | -1.094054 | -0.000000 | 1.027312  |
| H | -1.108801 | -0.886739 | -0.492489 |
| H | 1.352360  | 0.926401  | 0.048693  |
| H | 1.352360  | -0.926401 | 0.048693  |

== B3LYP/6-31G(2df,p) harmonic frequencies (cm<sup>-1</sup>) ==

|           |           |           |           |           |           |           |
|-----------|-----------|-----------|-----------|-----------|-----------|-----------|
| 118.5220  | 463.2274  | 806.8069  | 979.8948  | 1066.5708 | 1193.8214 | 1398.5265 |
| 1465.2600 | 1480.2369 | 1482.7358 | 2955.0694 | 3046.5395 | 3091.9310 | 3153.5073 |
| 3255.0012 |           |           |           |           |           |           |

== Thermochemistry energies (hartree) ==

|         |            |                                 |
|---------|------------|---------------------------------|
| ZPVE =  | 0.058272   | (after scaling by 0.9854)       |
| G4 Ee = | -79.137363 | (total electronic energy)       |
| G4 U0 = | -79.079091 | (Zero-kelvin internal energy)   |
| G4 UT = | -79.075101 | (Internal energy at 298.15 K)   |
| G4 HT = | -79.074156 | (Enthalpy at 298.15 K)          |
| G4 GT = | -79.103260 | (Gibbs free energy at 298.15 K) |

## Species 2: ROO·

[ G4 data ]

== B3LYP/6-31G(2df,p) equilibrium geometry (Angstrom) ==

|   |           |           |           |
|---|-----------|-----------|-----------|
| C | -1.460888 | -0.473836 | -0.092055 |
| C | -0.493664 | 0.643320  | 0.254520  |
| O | 0.800895  | 0.431569  | -0.382490 |
| O | 1.445587  | -0.567942 | 0.176034  |
| H | -0.817619 | 1.613124  | -0.133159 |
| H | -0.314809 | 0.716925  | 1.330408  |
| H | -1.623000 | -0.530237 | -1.172004 |
| H | -2.424507 | -0.295566 | 0.394600  |
| H | -1.064599 | -1.430171 | 0.257011  |

== B3LYP/6-31G(2df,p) harmonic frequencies (cm<sup>-1</sup>) ==

|           |           |           |           |           |           |           |
|-----------|-----------|-----------|-----------|-----------|-----------|-----------|
| 112.7331  | 232.0360  | 356.3188  | 529.4444  | 797.2629  | 846.9625  | 997.8804  |
| 1095.8060 | 1165.9238 | 1210.3515 | 1304.5556 | 1376.3033 | 1402.9253 | 1478.4773 |
| 1484.6873 | 1504.6226 | 3048.7460 | 3063.7662 | 3114.8992 | 3124.1377 | 3141.8747 |

== Thermochemistry energies (hartree) ==

|         |             |                                 |
|---------|-------------|---------------------------------|
| ZPVE =  | 0.070467    | (after scaling by 0.9854)       |
| G4 Ee = | -229.481519 | (total electronic energy)       |
| G4 U0 = | -229.411052 | (Zero-kelvin internal energy)   |
| G4 UT = | -229.406119 | (Internal energy at 298.15 K)   |
| G4 HT = | -229.405174 | (Enthalpy at 298.15 K)          |
| G4 GT = | -229.439050 | (Gibbs free energy at 298.15 K) |



### Species 3: ·QOOH

[ G4 data ]

== B3LYP/6-31G(2df,p) equilibrium geometry (Angstrom) ==

|   |           |           |           |
|---|-----------|-----------|-----------|
| C | -0.618599 | 0.608241  | 0.241659  |
| C | -1.490274 | -0.547844 | -0.094736 |
| H | -1.564984 | -0.881131 | -1.124588 |
| H | -2.119073 | -1.019689 | 0.650067  |
| O | 0.661371  | 0.560810  | -0.390321 |
| O | 1.414366  | -0.498673 | 0.238906  |
| H | 1.256291  | -1.232272 | -0.372965 |
| H | -1.030847 | 1.554125  | -0.148258 |
| H | -0.494049 | 0.719487  | 1.325535  |

== B3LYP/6-31G(2df,p) harmonic frequencies (cm<sup>-1</sup>) ==

|           |           |           |           |           |           |           |
|-----------|-----------|-----------|-----------|-----------|-----------|-----------|
| 135.3819  | 165.1868  | 223.3654  | 361.7345  | 460.2875  | 554.8496  | 842.0311  |
| 875.8268  | 969.3219  | 1063.6274 | 1134.5250 | 1268.6266 | 1374.6405 | 1385.1893 |
| 1444.4081 | 1457.2336 | 2972.5159 | 3052.0586 | 3150.6338 | 3262.7659 | 3742.8909 |

== Thermochemistry energies (hartree) ==

|         |             |                                 |
|---------|-------------|---------------------------------|
| ZPVE =  | 0.067116    | (after scaling by 0.9854)       |
| G4 Ee = | -229.451560 | (total electronic energy)       |
| G4 U0 = | -229.384444 | (Zero-kelvin internal energy)   |
| G4 UT = | -229.378707 | (Internal energy at 298.15 K)   |
| G4 HT = | -229.377763 | (Enthalpy at 298.15 K)          |
| G4 GT = | -229.413034 | (Gibbs free energy at 298.15 K) |

## Species 4: *cy*-ether

[ G4 data ]

== B3LYP/6-31G(2df,p) equilibrium geometry (Angstrom) ==

|   |           |           |           |
|---|-----------|-----------|-----------|
| C | 0.000000  | 0.733527  | -0.370055 |
| C | -0.000000 | -0.733527 | -0.370055 |
| O | -0.000000 | 0.000000  | 0.852095  |
| H | -0.919578 | 1.272148  | -0.594025 |
| H | 0.919578  | 1.272148  | -0.594025 |
| H | 0.919578  | -1.272148 | -0.594025 |
| H | -0.919578 | -1.272148 | -0.594025 |

== B3LYP/6-31G(2df,p) harmonic frequencies (cm<sup>-1</sup>) ==

|           |           |           |           |           |           |           |
|-----------|-----------|-----------|-----------|-----------|-----------|-----------|
| 812.9487  | 860.5296  | 901.7281  | 1044.5186 | 1154.2404 | 1154.9537 | 1170.7754 |
| 1174.4229 | 1309.2903 | 1506.7219 | 1541.9277 | 3081.6501 | 3089.8344 | 3162.4536 |
| 3179.2708 |           |           |           |           |           |           |

== Thermochemistry energies (hartree) ==

|         |             |                                 |
|---------|-------------|---------------------------------|
| ZPVE =  | 0.056449    | (after scaling by 0.9854)       |
| G4 Ee = | -153.756763 | (total electronic energy)       |
| G4 U0 = | -153.700314 | (Zero-kelvin internal energy)   |
| G4 UT = | -153.697144 | (Internal energy at 298.15 K)   |
| G4 HT = | -153.696200 | (Enthalpy at 298.15 K)          |
| G4 GT = | -153.723745 | (Gibbs free energy at 298.15 K) |

## Species 5: alkene

[ G4 data ]

== B3LYP/6-31G(2df,p) equilibrium geometry (Angstrom) ==

|   |           |           |           |
|---|-----------|-----------|-----------|
| C | 0.000000  | -0.000000 | 0.663578  |
| C | 0.000000  | -0.000000 | -0.663578 |
| H | 0.000000  | 0.921267  | 1.238128  |
| H | -0.000000 | -0.921267 | 1.238128  |
| H | 0.000000  | 0.921267  | -1.238128 |
| H | -0.000000 | -0.921267 | -1.238128 |

== B3LYP/6-31G(2df,p) harmonic frequencies (cm<sup>-1</sup>) ==

|           |           |           |           |           |           |           |
|-----------|-----------|-----------|-----------|-----------|-----------|-----------|
| 823.8985  | 969.0948  | 982.7256  | 1072.5933 | 1237.0082 | 1386.1028 | 1472.2881 |
| 1698.8344 | 3137.7312 | 3154.3060 | 3209.3526 | 3237.0483 |           |           |

== Thermochemistry energies (hartree) ==

|         |            |                                 |
|---------|------------|---------------------------------|
| ZPVE =  | 0.050243   | (after scaling by 0.9854)       |
| G4 Ee = | -78.572119 | (total electronic energy)       |
| G4 U0 = | -78.521876 | (Zero-kelvin internal energy)   |
| G4 UT = | -78.518821 | (Internal energy at 298.15 K)   |
| G4 HT = | -78.517876 | (Enthalpy at 298.15 K)          |
| G4 GT = | -78.542748 | (Gibbs free energy at 298.15 K) |

Species 6: Transition state along  $\text{ROO} \cdot \xrightarrow{\text{TS1}} \cdot\text{QOOH}$

[ G4 data ]

== B3LYP/6-31G(2df,p) equilibrium geometry (Angstrom) ==

|   |           |           |           |
|---|-----------|-----------|-----------|
| C | -1.227675 | -0.564156 | -0.119316 |
| C | -0.534338 | 0.754699  | 0.211607  |
| O | 0.792905  | 0.591413  | -0.292596 |
| O | 1.138219  | -0.699763 | 0.162298  |
| H | -0.952597 | 1.632973  | -0.292179 |
| H | -0.523293 | 0.915949  | 1.296880  |
| H | -1.477253 | -0.732513 | -1.166762 |
| H | -1.955102 | -0.957857 | 0.586972  |
| H | 0.031331  | -1.135005 | 0.063733  |

== B3LYP/6-31G(2df,p) harmonic frequencies (cm<sup>-1</sup>) ==

|            |           |           |           |           |           |           |
|------------|-----------|-----------|-----------|-----------|-----------|-----------|
| -2268.5031 | 273.2460  | 434.8931  | 552.9337  | 688.6682  | 869.5936  | 904.5487  |
| 919.4689   | 968.8485  | 1043.8970 | 1102.8011 | 1166.5293 | 1244.6710 | 1344.4836 |
| 1452.9097  | 1495.3830 | 1746.0743 | 3023.0273 | 3082.9184 | 3108.6442 | 3203.8479 |

== Thermochemistry energies (hartree) ==

|         |             |                                 |
|---------|-------------|---------------------------------|
| ZPVE =  | 0.064266    | (after scaling by 0.9854)       |
| G4 Ee = | -229.416085 | (total electronic energy)       |
| G4 U0 = | -229.351819 | (Zero-kelvin internal energy)   |
| G4 UT = | -229.347595 | (Internal energy at 298.15 K)   |
| G4 HT = | -229.346651 | (Enthalpy at 298.15 K)          |
| G4 GT = | -229.378776 | (Gibbs free energy at 298.15 K) |

Species 7: Transition state along  $\text{ROO} \cdot \xrightarrow{\text{TS2}} \text{alkene} + \cdot\text{OOH}$

[ G4 data ]

== B3LYP/6-31G(2df,p) equilibrium geometry (Angstrom) ==

|   |           |           |           |
|---|-----------|-----------|-----------|
| C | 1.290788  | -0.614114 | -0.000044 |
| C | 1.037720  | 0.746214  | 0.000030  |
| O | -1.145793 | 0.612125  | -0.000036 |
| O | -1.257086 | -0.651477 | 0.000020  |
| H | 1.012855  | 1.323058  | 0.916843  |
| H | 1.012801  | 1.323117  | -0.916744 |
| H | 1.634764  | -1.086387 | 0.917859  |
| H | 1.634769  | -1.086394 | -0.917930 |
| H | -0.043207 | -0.951173 | 0.000186  |

== B3LYP/6-31G(2df,p) harmonic frequencies (cm<sup>-1</sup>) ==

|            |           |           |           |           |           |           |
|------------|-----------|-----------|-----------|-----------|-----------|-----------|
| -1069.5196 | 217.7651  | 367.9202  | 477.6298  | 522.8807  | 637.6299  | 823.8097  |
| 898.7402   | 1010.4460 | 1036.0826 | 1223.7203 | 1288.6078 | 1325.3064 | 1363.5363 |
| 1468.6440  | 1572.9906 | 1620.0352 | 3113.8765 | 3170.5876 | 3192.4683 | 3258.3626 |

== Thermochemistry energies (hartree) ==

|         |             |                                 |
|---------|-------------|---------------------------------|
| ZPVE =  | 0.064184    | (after scaling by 0.9854)       |
| G4 Ee = | -229.424654 | (total electronic energy)       |
| G4 U0 = | -229.360470 | (Zero-kelvin internal energy)   |
| G4 UT = | -229.355880 | (Internal energy at 298.15 K)   |
| G4 HT = | -229.354936 | (Enthalpy at 298.15 K)          |
| G4 GT = | -229.387950 | (Gibbs free energy at 298.15 K) |

Species 8: Transition state along  $\cdot\text{QOOH} \xrightarrow{\text{TS3}} \text{alkene} + \cdot\text{OOH}$

[ G4 data ]

== B3LYP/6-31G(2df,p) equilibrium geometry (Angstrom) ==

|   |           |           |           |
|---|-----------|-----------|-----------|
| C | 0.923409  | -0.549628 | 0.362510  |
| C | 1.632527  | 0.530041  | -0.116358 |
| H | 2.190170  | 0.472496  | -1.044352 |
| H | 1.569903  | 1.502348  | 0.360289  |
| O | -0.771544 | -0.467891 | -0.483270 |
| O | -1.613328 | 0.349542  | 0.252655  |
| H | -1.653877 | 1.157799  | -0.281524 |
| H | 1.123553  | -1.540209 | -0.032105 |
| H | 0.513615  | -0.528120 | 1.365702  |

== B3LYP/6-31G(2df,p) harmonic frequencies (cm<sup>-1</sup>) ==

|           |           |           |           |           |           |           |
|-----------|-----------|-----------|-----------|-----------|-----------|-----------|
| -535.3847 | 89.8197   | 225.1290  | 305.8350  | 420.4425  | 474.4903  | 808.9607  |
| 824.5738  | 936.9307  | 1032.4690 | 1085.1118 | 1238.2991 | 1270.6563 | 1403.3411 |
| 1464.7228 | 1543.8180 | 3149.7743 | 3155.1357 | 3228.2447 | 3254.1159 | 3701.6005 |

== Thermochemistry energies (hartree) ==

|         |             |                                 |
|---------|-------------|---------------------------------|
| ZPVE =  | 0.066479    | (after scaling by 0.9854)       |
| G4 Ee = | -229.422775 | (total electronic energy)       |
| G4 U0 = | -229.356296 | (Zero-kelvin internal energy)   |
| G4 UT = | -229.350902 | (Internal energy at 298.15 K)   |
| G4 HT = | -229.349958 | (Enthalpy at 298.15 K)          |
| G4 GT = | -229.384909 | (Gibbs free energy at 298.15 K) |

Species 9: Transition state along  $\cdot\text{QOOH} \xrightarrow{\text{TS4}} \text{cycloether} + \cdot\text{OH}$

[ G4 data ]

== B3LYP/6-31G(2df,p) equilibrium geometry (Angstrom) ==

|   |           |           |           |
|---|-----------|-----------|-----------|
| C | -0.578363 | 0.709482  | 0.033643  |
| C | -1.688552 | -0.261274 | 0.040263  |
| H | -2.118764 | -0.609603 | -0.889217 |
| H | -1.987685 | -0.738162 | 0.964049  |
| O | 0.197069  | -0.440314 | -0.122778 |
| O | 1.872417  | 0.025436  | -0.038128 |
| H | 2.093242  | -0.658995 | 0.610196  |
| H | -0.536914 | 1.397687  | -0.817621 |
| H | -0.404271 | 1.238849  | 0.976410  |

== B3LYP/6-31G(2df,p) harmonic frequencies (cm<sup>-1</sup>) ==

|           |           |           |           |           |           |           |
|-----------|-----------|-----------|-----------|-----------|-----------|-----------|
| -776.0281 | 96.6467   | 154.2865  | 257.9157  | 401.6792  | 503.9195  | 759.0851  |
| 829.9545  | 947.1085  | 1005.9751 | 1170.9968 | 1171.9054 | 1195.2033 | 1315.1484 |
| 1465.6598 | 1534.2704 | 3030.1281 | 3084.2994 | 3177.1143 | 3295.3648 | 3779.0766 |

== Thermochemistry energies (hartree) ==

|         |             |                                 |
|---------|-------------|---------------------------------|
| ZPVE =  | 0.065497    | (after scaling by 0.9854)       |
| G4 Ee = | -229.423786 | (total electronic energy)       |
| G4 U0 = | -229.358289 | (Zero-kelvin internal energy)   |
| G4 UT = | -229.352718 | (Internal energy at 298.15 K)   |
| G4 HT = | -229.351774 | (Enthalpy at 298.15 K)          |
| G4 GT = | -229.386942 | (Gibbs free energy at 298.15 K) |

## Hydrocarbon 2: isopropyl

### Species 1: ·R

[ G4 data ]

== B3LYP/6-31G(2df,p) equilibrium geometry (Angstrom) ==

|   |           |           |           |
|---|-----------|-----------|-----------|
| C | -0.011385 | -0.196921 | -1.299512 |
| C | -0.011385 | 0.533303  | 0.000000  |
| C | -0.011385 | -0.196921 | 1.299512  |
| H | -0.267671 | 0.457984  | -2.138299 |
| H | -0.721788 | -1.034156 | -1.291916 |
| H | 0.974708  | -0.637805 | -1.531680 |
| H | 0.234440  | 1.591182  | 0.000000  |
| H | -0.721788 | -1.034156 | 1.291916  |
| H | -0.267671 | 0.457984  | 2.138299  |
| H | 0.974708  | -0.637805 | 1.531680  |

== B3LYP/6-31G(2df,p) harmonic frequencies (cm<sup>-1</sup>) ==

|           |           |           |           |           |           |           |
|-----------|-----------|-----------|-----------|-----------|-----------|-----------|
| 114.2539  | 122.5276  | 360.2223  | 412.3982  | 883.1156  | 936.3367  | 941.7395  |
| 1034.0765 | 1151.1549 | 1177.4816 | 1367.5720 | 1405.3871 | 1412.5419 | 1468.9112 |
| 1479.5068 | 1479.7926 | 1490.5800 | 2942.1611 | 2947.3639 | 3029.7343 | 3031.5121 |
| 3090.9189 | 3091.5475 | 3170.1558 |           |           |           |           |

== Thermochemistry energies (hartree) ==

|         |             |                                 |
|---------|-------------|---------------------------------|
| ZPVE =  | 0.086521    | (after scaling by 0.9854)       |
| G4 Ee = | -118.447899 | (total electronic energy)       |
| G4 U0 = | -118.361378 | (Zero-kelvin internal energy)   |
| G4 UT = | -118.356198 | (Internal energy at 298.15 K)   |
| G4 HT = | -118.355253 | (Enthalpy at 298.15 K)          |
| G4 GT = | -118.388585 | (Gibbs free energy at 298.15 K) |



## Species 2: ROO·

[ G4 data ]

== B3LYP/6-31G(2df,p) equilibrium geometry (Angstrom) ==

|   |           |           |           |
|---|-----------|-----------|-----------|
| C | 1.577658  | -0.823329 | 0.024841  |
| C | 0.367361  | 0.019925  | -0.340583 |
| C | 0.447706  | 1.470383  | 0.109891  |
| H | 1.442063  | -1.860998 | -0.290845 |
| H | 1.748408  | -0.808158 | 1.105591  |
| H | 2.469025  | -0.425444 | -0.468061 |
| H | 0.647817  | 1.532825  | 1.184150  |
| H | -0.494117 | 1.979411  | -0.105738 |
| H | 1.253346  | 1.984335  | -0.422934 |
| O | -0.775775 | -0.630913 | 0.322022  |
| O | -1.921246 | -0.164938 | -0.116342 |
| H | 0.153281  | -0.037041 | -1.412495 |

== B3LYP/6-31G(2df,p) harmonic frequencies (cm<sup>-1</sup>) ==

|           |           |           |           |           |           |           |
|-----------|-----------|-----------|-----------|-----------|-----------|-----------|
| 102.4036  | 196.0301  | 237.7539  | 299.7051  | 338.2530  | 447.9377  | 524.2669  |
| 797.0390  | 889.5823  | 933.5030  | 948.7715  | 1124.9089 | 1157.2540 | 1196.8417 |
| 1221.9526 | 1341.8293 | 1362.0283 | 1397.1737 | 1415.8216 | 1480.0608 | 1485.8040 |
| 1491.4014 | 1509.4188 | 3043.3012 | 3047.4302 | 3064.5749 | 3114.7198 | 3123.6286 |
| 3126.4236 | 3136.5185 |           |           |           |           |           |

== Thermochemistry energies (hartree) ==

|         |             |                                 |
|---------|-------------|---------------------------------|
| ZPVE =  | 0.097780    | (after scaling by 0.9854)       |
| G4 Ee = | -268.794777 | (total electronic energy)       |
| G4 U0 = | -268.696997 | (Zero-kelvin internal energy)   |
| G4 UT = | -268.690685 | (Internal energy at 298.15 K)   |
| G4 HT = | -268.689741 | (Enthalpy at 298.15 K)          |
| G4 GT = | -268.727007 | (Gibbs free energy at 298.15 K) |

### Species 3: ·QOOH

[ G4 data ]

== B3LYP/6-31G(2df,p) equilibrium geometry (Angstrom) ==

|   |           |           |           |
|---|-----------|-----------|-----------|
| C | -1.696364 | -0.680072 | -0.028858 |
| C | -0.408347 | 0.070213  | 0.335817  |
| C | -0.414776 | 1.492985  | -0.110307 |
| H | -1.624419 | -1.724710 | 0.286493  |
| H | -1.864612 | -0.649910 | -1.109193 |
| H | -2.551959 | -0.216094 | 0.468199  |
| H | -0.430855 | 1.717136  | -1.172597 |
| H | -0.483695 | 2.313093  | 0.593575  |
| O | 0.625862  | -0.685257 | -0.318260 |
| O | 1.898033  | -0.215453 | 0.171505  |
| H | -0.240425 | 0.012621  | 1.418388  |
| H | 2.121728  | 0.454786  | -0.490748 |

== B3LYP/6-31G(2df,p) harmonic frequencies (cm<sup>-1</sup>) ==

|           |           |           |           |           |           |           |
|-----------|-----------|-----------|-----------|-----------|-----------|-----------|
| 107.6434  | 141.1428  | 214.9469  | 227.7827  | 283.1771  | 328.9959  | 456.3603  |
| 477.1515  | 564.4452  | 837.2918  | 909.9851  | 923.8900  | 961.0398  | 1041.1470 |
| 1154.9425 | 1172.7448 | 1313.0969 | 1376.5472 | 1388.3862 | 1391.6242 | 1453.0799 |
| 1481.2488 | 1494.9350 | 3031.9261 | 3044.5794 | 3122.9781 | 3127.8782 | 3143.9956 |
| 3258.0072 | 3738.2843 |           |           |           |           |           |

== Thermochemistry energies (hartree) ==

|         |             |                                 |
|---------|-------------|---------------------------------|
| ZPVE =  | 0.094666    | (after scaling by 0.9854)       |
| G4 Ee = | -268.764214 | (total electronic energy)       |
| G4 U0 = | -268.669548 | (Zero-kelvin internal energy)   |
| G4 UT = | -268.662376 | (Internal energy at 298.15 K)   |
| G4 HT = | -268.661432 | (Enthalpy at 298.15 K)          |
| G4 GT = | -268.700288 | (Gibbs free energy at 298.15 K) |

## Species 4: *cy*-ether

[ G4 data ]

== B3LYP/6-31G(2df,p) equilibrium geometry (Angstrom) ==

|   |           |           |           |
|---|-----------|-----------|-----------|
| C | -1.509832 | 0.101084  | -0.147961 |
| C | -0.151286 | -0.041127 | 0.486983  |
| C | 1.044170  | 0.613579  | -0.058565 |
| H | -2.082614 | -0.826798 | -0.048580 |
| H | -1.415537 | 0.332323  | -1.212510 |
| H | -2.079920 | 0.901623  | 0.335837  |
| O | 0.825822  | -0.785995 | -0.244382 |
| H | -0.154967 | -0.260138 | 1.556434  |
| H | 1.872069  | 0.876681  | 0.598688  |
| H | 0.956081  | 1.223054  | -0.957555 |

== B3LYP/6-31G(2df,p) harmonic frequencies (cm<sup>-1</sup>) ==

|           |           |           |           |           |           |           |
|-----------|-----------|-----------|-----------|-----------|-----------|-----------|
| 207.1293  | 363.3563  | 405.8293  | 780.2022  | 854.3706  | 903.7468  | 979.6860  |
| 1040.9844 | 1131.9713 | 1157.6617 | 1164.1154 | 1186.5905 | 1298.6872 | 1403.2619 |
| 1439.6703 | 1483.3858 | 1497.2284 | 1532.7950 | 3035.5031 | 3078.3983 | 3089.2485 |
| 3100.5687 | 3122.1771 | 3164.2167 |           |           |           |           |

== Thermochemistry energies (hartree) ==

|         |             |                                 |
|---------|-------------|---------------------------------|
| ZPVE =  | 0.084006    | (after scaling by 0.9854)       |
| G4 Ee = | -193.070090 | (total electronic energy)       |
| G4 U0 = | -192.986084 | (Zero-kelvin internal energy)   |
| G4 UT = | -192.981621 | (Internal energy at 298.15 K)   |
| G4 HT = | -192.980677 | (Enthalpy at 298.15 K)          |
| G4 GT = | -193.012495 | (Gibbs free energy at 298.15 K) |

## Species 5: alkene

[ G4 data ]

== B3LYP/6-31G(2df,p) equilibrium geometry (Angstrom) ==

|   |           |           |           |
|---|-----------|-----------|-----------|
| C | -1.232927 | 0.162649  | 0.000086  |
| C | 0.134410  | -0.453581 | 0.000057  |
| C | 1.280713  | 0.219347  | -0.000150 |
| H | -1.809402 | -0.152027 | 0.878917  |
| H | -1.809585 | -0.152340 | -0.878513 |
| H | -1.181336 | 1.255270  | -0.000113 |
| H | 0.161772  | -1.542820 | 0.000228  |
| H | 1.303924  | 1.305847  | -0.000325 |
| H | 2.241453  | -0.284420 | -0.000152 |

== B3LYP/6-31G(2df,p) harmonic frequencies (cm<sup>-1</sup>) ==

|           |           |           |           |           |           |           |
|-----------|-----------|-----------|-----------|-----------|-----------|-----------|
| 211.5706  | 420.7874  | 591.4733  | 927.6020  | 943.8587  | 944.2965  | 1036.3900 |
| 1071.3711 | 1190.1796 | 1329.1228 | 1406.0328 | 1451.1097 | 1480.0638 | 1494.0332 |
| 1722.1810 | 3019.8062 | 3067.5182 | 3105.2242 | 3133.7390 | 3143.3223 | 3223.0458 |

== Thermochemistry energies (hartree) ==

|         |             |                                 |
|---------|-------------|---------------------------------|
| ZPVE =  | 0.078376    | (after scaling by 0.9854)       |
| G4 Ee = | -117.882262 | (total electronic energy)       |
| G4 U0 = | -117.803886 | (Zero-kelvin internal energy)   |
| G4 UT = | -117.799772 | (Internal energy at 298.15 K)   |
| G4 HT = | -117.798828 | (Enthalpy at 298.15 K)          |
| G4 GT = | -117.828901 | (Gibbs free energy at 298.15 K) |

Species 6: Transition state along  $\text{ROO} \cdot \xrightarrow{\text{TS1}} \cdot\text{QOOH}$

[ G4 data ]

== B3LYP/6-31G(2df,p) equilibrium geometry (Angstrom) ==

|   |           |           |           |
|---|-----------|-----------|-----------|
| C | 0.110278  | 1.384917  | -0.117585 |
| H | 0.041313  | 2.239980  | 0.551660  |
| H | -0.077387 | 1.617650  | -1.166837 |
| H | 1.369421  | 0.803521  | -0.078050 |
| C | -0.414000 | 0.033077  | 0.374410  |
| H | -0.335241 | 0.002801  | 1.470014  |
| C | -1.813372 | -0.343923 | -0.083640 |
| H | -2.544892 | 0.357336  | 0.327988  |
| H | -1.879922 | -0.320818 | -1.174824 |
| H | -2.071546 | -1.349336 | 0.261788  |
| O | 1.766942  | -0.313214 | 0.037975  |
| O | 0.508161  | -0.911232 | -0.191831 |

== B3LYP/6-31G(2df,p) harmonic frequencies (cm<sup>-1</sup>) ==

|            |           |           |           |           |           |           |
|------------|-----------|-----------|-----------|-----------|-----------|-----------|
| -2226.9706 | 191.2786  | 203.7125  | 313.6092  | 395.0579  | 481.5921  | 567.5939  |
| 657.6417   | 844.9281  | 877.0044  | 928.5725  | 958.7633  | 970.6661  | 1091.4146 |
| 1105.9478  | 1138.3719 | 1179.5933 | 1335.0816 | 1369.8462 | 1404.5544 | 1454.2401 |
| 1482.1446  | 1494.0665 | 1740.6918 | 3011.0370 | 3044.1964 | 3098.0688 | 3118.7939 |
| 3125.5754  | 3195.9261 |           |           |           |           |           |

== Thermochemistry energies (hartree) ==

|         |             |                                 |
|---------|-------------|---------------------------------|
| ZPVE =  | 0.091547    | (after scaling by 0.9854)       |
| G4 Ee = | -268.730305 | (total electronic energy)       |
| G4 U0 = | -268.638758 | (Zero-kelvin internal energy)   |
| G4 UT = | -268.633080 | (Internal energy at 298.15 K)   |
| G4 HT = | -268.632136 | (Enthalpy at 298.15 K)          |
| G4 GT = | -268.667813 | (Gibbs free energy at 298.15 K) |

Species 7: Transition state along  $\text{ROO}\cdot \xrightarrow{\text{TS2}} \text{alkene} + \cdot\text{OOH}$

[ G4 data ]

== B3LYP/6-31G(2df,p) equilibrium geometry (Angstrom) ==

|   |           |           |           |
|---|-----------|-----------|-----------|
| C | -0.314241 | 1.410888  | -0.046247 |
| H | -0.063688 | 2.222794  | 0.633463  |
| H | -0.652831 | 1.723090  | -1.033368 |
| H | 0.929825  | 0.901967  | -0.309579 |
| C | -0.814911 | 0.228792  | 0.479796  |
| H | -0.747221 | 0.061870  | 1.550797  |
| C | -1.667453 | -0.734115 | -0.282225 |
| H | -1.544439 | -0.611474 | -1.361872 |
| H | -1.444029 | -1.770510 | -0.016120 |
| H | -2.725608 | -0.555730 | -0.044981 |
| O | 1.789392  | -0.007605 | -0.293847 |
| O | 1.089061  | -0.918069 | 0.253061  |

== B3LYP/6-31G(2df,p) harmonic frequencies (cm<sup>-1</sup>) ==

|            |           |           |           |           |           |           |
|------------|-----------|-----------|-----------|-----------|-----------|-----------|
| -1056.5180 | 149.9273  | 177.3243  | 211.1493  | 377.5832  | 417.1416  | 513.8589  |
| 624.1585   | 628.8354  | 897.4681  | 951.0000  | 961.8331  | 1034.7590 | 1059.8253 |
| 1195.6700  | 1278.2385 | 1304.7990 | 1349.5525 | 1402.0639 | 1440.7209 | 1476.0572 |
| 1486.7957  | 1577.1925 | 1621.3695 | 3017.4827 | 3086.4144 | 3105.1864 | 3123.7467 |
| 3172.5121  | 3193.1341 |           |           |           |           |           |

== Thermochemistry energies (hartree) ==

|         |             |                                 |
|---------|-------------|---------------------------------|
| ZPVE =  | 0.091673    | (after scaling by 0.9854)       |
| G4 Ee = | -268.738372 | (total electronic energy)       |
| G4 U0 = | -268.646699 | (Zero-kelvin internal energy)   |
| G4 UT = | -268.640611 | (Internal energy at 298.15 K)   |
| G4 HT = | -268.639667 | (Enthalpy at 298.15 K)          |
| G4 GT = | -268.676490 | (Gibbs free energy at 298.15 K) |

Species 8: Transition state along  $\cdot\text{QOOH} \xrightarrow{\text{TS3}} \text{alkene} + \cdot\text{OOH}$

[ G4 data ]

== B3LYP/6-31G(2df,p) equilibrium geometry (Angstrom) ==

|   |           |           |           |
|---|-----------|-----------|-----------|
| C | -0.728444 | 1.458539  | -0.117607 |
| H | -0.140880 | 2.268476  | 0.299235  |
| H | -1.280245 | 1.662274  | -1.029457 |
| H | 2.422997  | 0.497621  | -0.345665 |
| C | -0.665769 | 0.180822  | 0.405969  |
| H | -0.228396 | 0.064131  | 1.393361  |
| C | -1.642664 | -0.888256 | -0.001393 |
| H | -1.972902 | -0.750369 | -1.035017 |
| H | -1.189857 | -1.877724 | 0.092842  |
| H | -2.528473 | -0.854483 | 0.643339  |
| O | 2.016007  | -0.158115 | 0.240685  |
| O | 0.876370  | -0.531455 | -0.458241 |

== B3LYP/6-31G(2df,p) harmonic frequencies (cm<sup>-1</sup>) ==

|           |           |           |           |           |           |           |
|-----------|-----------|-----------|-----------|-----------|-----------|-----------|
| -510.6325 | 73.9664   | 148.4748  | 199.5973  | 296.0618  | 317.6227  | 420.4921  |
| 437.7855  | 524.8368  | 800.9840  | 898.3091  | 939.1007  | 971.4038  | 1024.7257 |
| 1082.6882 | 1190.3001 | 1269.8738 | 1393.2870 | 1400.6964 | 1430.5409 | 1478.0532 |
| 1494.0238 | 1532.5534 | 3036.9470 | 3100.9146 | 3128.7399 | 3148.3231 | 3167.0458 |
| 3243.5192 | 3707.6151 |           |           |           |           |           |

== Thermochemistry energies (hartree) ==

|         |             |                                 |
|---------|-------------|---------------------------------|
| ZPVE =  | 0.093968    | (after scaling by 0.9854)       |
| G4 Ee = | -268.735844 | (total electronic energy)       |
| G4 U0 = | -268.641876 | (Zero-kelvin internal energy)   |
| G4 UT = | -268.635051 | (Internal energy at 298.15 K)   |
| G4 HT = | -268.634107 | (Enthalpy at 298.15 K)          |
| G4 GT = | -268.672728 | (Gibbs free energy at 298.15 K) |

Species 9: Transition state along  $\cdot\text{QOOH} \xrightarrow{\text{TS4}} \text{cycloether} + \cdot\text{OH}$

[ G4 data ]

== B3LYP/6-31G(2df,p) equilibrium geometry (Angstrom) ==

|   |           |           |           |
|---|-----------|-----------|-----------|
| C | 1.338345  | -1.100022 | -0.021549 |
| H | 1.366409  | -2.013474 | 0.557365  |
| H | 1.815025  | -1.082327 | -0.993683 |
| C | 0.508811  | 0.042643  | 0.417080  |
| H | 0.307695  | 0.047376  | 1.495743  |
| C | 0.840580  | 1.427764  | -0.101137 |
| H | 1.066238  | 1.393359  | -1.171051 |
| H | -0.018164 | 2.086070  | 0.050890  |
| H | 1.701596  | 1.844220  | 0.431870  |
| O | -0.488894 | -0.633614 | -0.300943 |
| O | -2.002545 | 0.153594  | -0.003931 |
| H | -2.433703 | -0.657381 | 0.301502  |

== B3LYP/6-31G(2df,p) harmonic frequencies (cm<sup>-1</sup>) ==

|           |           |           |           |           |           |           |
|-----------|-----------|-----------|-----------|-----------|-----------|-----------|
| -763.2279 | 107.2972  | 158.7234  | 205.2157  | 250.7445  | 348.0349  | 411.5111  |
| 426.4045  | 538.9001  | 749.8319  | 848.2850  | 913.1887  | 922.5303  | 988.8375  |
| 1092.8574 | 1165.8846 | 1198.6501 | 1288.8660 | 1390.2481 | 1419.8835 | 1462.8959 |
| 1485.5992 | 1496.9920 | 3027.1544 | 3041.2437 | 3114.9221 | 3131.6148 | 3169.2382 |
| 3288.1386 | 3781.9958 |           |           |           |           |           |

== Thermochemistry energies (hartree) ==

|         |             |                                 |
|---------|-------------|---------------------------------|
| ZPVE =  | 0.092997    | (after scaling by 0.9854)       |
| G4 Ee = | -268.739354 | (total electronic energy)       |
| G4 U0 = | -268.646357 | (Zero-kelvin internal energy)   |
| G4 UT = | -268.639529 | (Internal energy at 298.15 K)   |
| G4 HT = | -268.638585 | (Enthalpy at 298.15 K)          |
| G4 GT = | -268.676843 | (Gibbs free energy at 298.15 K) |



## Hydrocarbon 3: isobutyl

### Species 1: ·R

[ G4 data ]

== B3LYP/6-31G(2df,p) equilibrium geometry (Angstrom) ==

|   |           |           |           |
|---|-----------|-----------|-----------|
| C | -1.270846 | -0.680363 | 0.102063  |
| C | -0.000002 | 0.059666  | -0.349082 |
| C | -0.000016 | 1.482759  | 0.102670  |
| C | 1.270861  | -0.680336 | 0.102047  |
| H | -2.172669 | -0.165652 | -0.245162 |
| H | -1.318699 | -0.738652 | 1.194985  |
| H | -1.292874 | -1.701416 | -0.292503 |
| H | -0.928251 | 2.035950  | 0.197606  |
| H | 0.928219  | 2.035916  | 0.197795  |
| H | -0.000013 | 0.049111  | -1.456180 |
| H | 1.318736  | -0.738609 | 1.194970  |
| H | 2.172669  | -0.165616 | -0.245203 |
| H | 1.292897  | -1.701395 | -0.292503 |

== B3LYP/6-31G(2df,p) harmonic frequencies (cm<sup>-1</sup>) ==

|           |           |           |           |           |           |           |
|-----------|-----------|-----------|-----------|-----------|-----------|-----------|
| 117.8511  | 227.6033  | 253.6171  | 355.4117  | 368.4169  | 398.6169  | 517.3034  |
| 813.0107  | 902.6052  | 942.4934  | 967.6414  | 983.6116  | 1090.5173 | 1180.5211 |
| 1205.2915 | 1316.6458 | 1328.9030 | 1395.7230 | 1411.9473 | 1463.8186 | 1487.4612 |
| 1491.4249 | 1501.7841 | 1510.6137 | 2901.0422 | 3026.5851 | 3030.5512 | 3096.3871 |
| 3099.0995 | 3099.9571 | 3102.2564 | 3141.2584 | 3244.0392 |           |           |

== Thermochemistry energies (hartree) ==

|         |             |                                 |
|---------|-------------|---------------------------------|
| ZPVE =  | 0.114432    | (after scaling by 0.9854)       |
| G4 Ee = | -157.752204 | (total electronic energy)       |
| G4 U0 = | -157.637772 | (Zero-kelvin internal energy)   |
| G4 UT = | -157.631585 | (Internal energy at 298.15 K)   |
| G4 HT = | -157.630641 | (Enthalpy at 298.15 K)          |
| G4 GT = | -157.666572 | (Gibbs free energy at 298.15 K) |

## Species 2: ROO·

[ G4 data ]

== B3LYP/6-31G(2df,p) equilibrium geometry (Angstrom) ==

|   |           |           |           |
|---|-----------|-----------|-----------|
| C | 1.993447  | -0.884283 | -0.174053 |
| C | 0.736607  | -0.011677 | -0.285763 |
| C | -0.358784 | -0.575291 | 0.617560  |
| C | 1.032218  | 1.458422  | 0.034614  |
| H | 1.787957  | -1.926218 | -0.440640 |
| H | 2.396816  | -0.870776 | 0.845476  |
| H | 2.777287  | -0.515647 | -0.842478 |
| H | 0.351817  | -0.080389 | -1.310841 |
| H | 1.435417  | 1.565572  | 1.048885  |
| H | 0.128652  | 2.069818  | -0.035320 |
| H | 1.772029  | 1.865070  | -0.661593 |
| O | -1.613844 | 0.146458  | 0.459699  |
| O | -2.184925 | -0.140240 | -0.689515 |
| H | -0.117504 | -0.452699 | 1.678828  |
| H | -0.563253 | -1.627504 | 0.402056  |

== B3LYP/6-31G(2df,p) harmonic frequencies (cm<sup>-1</sup>) ==

|           |           |           |           |           |           |           |
|-----------|-----------|-----------|-----------|-----------|-----------|-----------|
| 76.6961   | 112.5276  | 218.5098  | 233.7486  | 250.3893  | 330.3757  | 412.2006  |
| 413.0510  | 568.5512  | 818.7657  | 876.7285  | 934.2737  | 947.0305  | 957.8638  |
| 976.3325  | 1141.3825 | 1167.6864 | 1196.7295 | 1205.5467 | 1287.1245 | 1321.6878 |
| 1372.2193 | 1383.5363 | 1402.2594 | 1423.5858 | 1472.0624 | 1488.7217 | 1494.1276 |
| 1504.7754 | 1510.8486 | 3026.9395 | 3029.6620 | 3036.7481 | 3052.5211 | 3092.3866 |
| 3098.2143 | 3106.7795 | 3115.2595 | 3118.7428 |           |           |           |

== Thermochemistry energies (hartree) ==

|         |             |                                 |
|---------|-------------|---------------------------------|
| ZPVE =  | 0.126111    | (after scaling by 0.9854)       |
| G4 Ee = | -308.097564 | (total electronic energy)       |
| G4 U0 = | -307.971453 | (Zero-kelvin internal energy)   |
| G4 UT = | -307.963915 | (Internal energy at 298.15 K)   |
| G4 HT = | -307.962971 | (Enthalpy at 298.15 K)          |
| G4 GT = | -308.003593 | (Gibbs free energy at 298.15 K) |

### Species 3: ·QOOH

[ G4 data ]

== B3LYP/6-31G(2df,p) equilibrium geometry (Angstrom) ==

|   |           |           |           |
|---|-----------|-----------|-----------|
| C | 1.831619  | -1.059756 | -0.241913 |
| C | 0.822321  | -0.006088 | 0.073372  |
| C | -0.382699 | -0.329430 | 0.898202  |
| C | 1.152604  | 1.431104  | -0.177911 |
| H | 1.395311  | -2.063328 | -0.217651 |
| H | 2.674053  | -1.056922 | 0.471694  |
| H | 2.279490  | -0.904878 | -1.232392 |
| H | 1.906122  | 1.808716  | 0.535002  |
| H | 0.267249  | 2.066115  | -0.079374 |
| H | 1.580374  | 1.582529  | -1.177104 |
| O | -1.585177 | 0.289429  | 0.428723  |
| O | -1.949948 | -0.356725 | -0.810002 |
| H | -0.308569 | 0.084026  | 1.919174  |
| H | -0.534991 | -1.412395 | 0.980030  |
| H | -1.521104 | 0.219519  | -1.459636 |

== B3LYP/6-31G(2df,p) harmonic frequencies (cm<sup>-1</sup>) ==

|           |           |           |           |           |           |           |
|-----------|-----------|-----------|-----------|-----------|-----------|-----------|
| 46.5844   | 83.9263   | 116.0644  | 141.0837  | 200.4833  | 244.8936  | 308.0653  |
| 359.6478  | 399.5900  | 556.7743  | 775.8179  | 870.8506  | 941.2752  | 945.8924  |
| 971.8560  | 1002.4326 | 1016.4325 | 1056.8573 | 1241.5226 | 1290.7011 | 1303.0402 |
| 1376.7427 | 1384.5439 | 1397.6612 | 1414.1249 | 1454.6200 | 1468.2357 | 1474.7994 |
| 1486.0105 | 1495.4335 | 2952.7097 | 2955.8001 | 2962.0161 | 3029.3251 | 3037.3015 |
| 3050.2585 | 3094.0948 | 3103.3924 | 3737.2827 |           |           |           |

== Thermochemistry energies (hartree) ==

|         |             |                                 |
|---------|-------------|---------------------------------|
| ZPVE =  | 0.122904    | (after scaling by 0.9854)       |
| G4 Ee = | -308.075988 | (total electronic energy)       |
| G4 U0 = | -307.953084 | (Zero-kelvin internal energy)   |
| G4 UT = | -307.944426 | (Internal energy at 298.15 K)   |
| G4 HT = | -307.943482 | (Enthalpy at 298.15 K)          |
| G4 GT = | -307.987137 | (Gibbs free energy at 298.15 K) |

## Species 4: *cy*-ether

[ G4 data ]

== B3LYP/6-31G(2df,p) equilibrium geometry (Angstrom) ==

|   |           |           |           |
|---|-----------|-----------|-----------|
| C | -0.052805 | 0.932113  | 1.283142  |
| C | -0.052805 | 0.130594  | 0.000000  |
| C | -0.576412 | -1.243896 | -0.000000 |
| C | -0.052805 | 0.932113  | -1.283142 |
| H | -0.017656 | 0.271445  | 2.152650  |
| H | -0.950137 | 1.556461  | 1.353379  |
| H | 0.818908  | 1.594574  | 1.321459  |
| H | -0.950137 | 1.556461  | -1.353379 |
| H | -0.017656 | 0.271445  | -2.152650 |
| H | 0.818908  | 1.594574  | -1.321459 |
| O | 0.832730  | -1.000942 | -0.000000 |
| H | -0.977554 | -1.671483 | -0.918593 |
| H | -0.977554 | -1.671483 | 0.918593  |

== B3LYP/6-31G(2df,p) harmonic frequencies (cm<sup>-1</sup>) ==

|           |           |           |           |           |           |           |
|-----------|-----------|-----------|-----------|-----------|-----------|-----------|
| 179.6030  | 217.1014  | 350.5030  | 358.3323  | 406.1078  | 408.5472  | 704.3365  |
| 819.1405  | 904.8970  | 931.7381  | 955.3221  | 1017.9411 | 1076.7892 | 1134.1790 |
| 1149.2917 | 1173.5645 | 1282.5037 | 1394.2902 | 1409.6260 | 1421.4209 | 1473.7738 |
| 1485.9881 | 1493.5316 | 1505.9467 | 1536.4685 | 3031.3025 | 3036.3834 | 3074.7740 |
| 3093.4869 | 3098.3991 | 3122.4915 | 3124.6722 | 3158.3729 |           |           |

== Thermochemistry energies (hartree) ==

|         |             |                                 |
|---------|-------------|---------------------------------|
| ZPVE =  | 0.111192    | (after scaling by 0.9854)       |
| G4 Ee = | -232.384120 | (total electronic energy)       |
| G4 U0 = | -232.272928 | (Zero-kelvin internal energy)   |
| G4 UT = | -232.267081 | (Internal energy at 298.15 K)   |
| G4 HT = | -232.266137 | (Enthalpy at 298.15 K)          |
| G4 GT = | -232.301294 | (Gibbs free energy at 298.15 K) |

## Species 5: alkene

[ G4 data ]

== B3LYP/6-31G(2df,p) equilibrium geometry (Angstrom) ==

|   |           |           |           |
|---|-----------|-----------|-----------|
| C | 1.274947  | -0.677941 | 0.000003  |
| C | 0.000000  | 0.124566  | -0.000002 |
| C | 0.000001  | 1.456978  | -0.000016 |
| C | -1.274949 | -0.677939 | 0.000011  |
| H | 2.159636  | -0.036470 | -0.000009 |
| H | 1.327183  | -1.334165 | -0.878355 |
| H | 1.327191  | -1.334143 | 0.878378  |
| H | -1.327192 | -1.334163 | -0.878347 |
| H | -2.159636 | -0.036467 | 0.000006  |
| H | -1.327187 | -1.334141 | 0.878386  |
| H | 0.923232  | 2.027782  | -0.000025 |
| H | -0.923229 | 2.027784  | -0.000019 |

== B3LYP/6-31G(2df,p) harmonic frequencies (cm<sup>-1</sup>) ==

|           |           |           |           |           |           |           |
|-----------|-----------|-----------|-----------|-----------|-----------|-----------|
| 176.6651  | 213.5577  | 376.2478  | 435.0083  | 442.6857  | 708.8943  | 817.1783  |
| 927.1980  | 962.8198  | 987.0313  | 1023.8777 | 1087.9719 | 1107.6406 | 1295.7868 |
| 1407.9467 | 1413.5192 | 1448.0732 | 1470.7393 | 1483.9391 | 1488.7150 | 1503.0376 |
| 1729.3903 | 3013.1169 | 3018.9421 | 3059.9435 | 3063.1561 | 3114.0538 | 3116.0626 |
| 3141.8320 | 3220.9491 |           |           |           |           |           |

== Thermochemistry energies (hartree) ==

|         |             |                                 |
|---------|-------------|---------------------------------|
| ZPVE =  | 0.106085    | (after scaling by 0.9854)       |
| G4 Ee = | -157.194053 | (total electronic energy)       |
| G4 U0 = | -157.087968 | (Zero-kelvin internal energy)   |
| G4 UT = | -157.082615 | (Internal energy at 298.15 K)   |
| G4 HT = | -157.081671 | (Enthalpy at 298.15 K)          |
| G4 GT = | -157.115288 | (Gibbs free energy at 298.15 K) |

Species 6: Transition state along  $\text{ROO} \cdot \xrightarrow{\text{TS1}} \cdot\text{QOOH}$

[ G4 data ]

== B3LYP/6-31G(2df,p) equilibrium geometry (Angstrom) ==

|   |           |           |           |
|---|-----------|-----------|-----------|
| C | 1.750055  | -1.012434 | -0.150784 |
| C | 0.634926  | -0.007462 | -0.036193 |
| C | -0.497595 | -0.322259 | 0.961210  |
| C | 1.027162  | 1.449398  | -0.106941 |
| H | 1.366968  | -2.034401 | -0.232848 |
| H | 2.403852  | -0.977024 | 0.734530  |
| H | 2.384051  | -0.806197 | -1.019250 |
| H | -0.315075 | -0.199469 | -0.986043 |
| H | 1.643846  | 1.724785  | 0.762485  |
| H | 0.142498  | 2.091895  | -0.104984 |
| H | 1.618383  | 1.663787  | -1.002580 |
| O | -1.668946 | 0.189290  | 0.335786  |
| O | -1.549698 | -0.300080 | -0.985186 |
| H | -0.406805 | 0.186608  | 1.928416  |
| H | -0.575856 | -1.407121 | 1.111720  |

== B3LYP/6-31G(2df,p) harmonic frequencies (cm<sup>-1</sup>) ==

|            |           |           |           |           |           |           |
|------------|-----------|-----------|-----------|-----------|-----------|-----------|
| -2094.7790 | 130.9551  | 187.0857  | 222.6045  | 258.4590  | 279.3323  | 358.5218  |
| 400.2419   | 548.8562  | 663.1771  | 815.3251  | 914.0868  | 930.5995  | 948.3373  |
| 969.0100   | 982.2558  | 1015.8978 | 1121.3007 | 1134.6814 | 1227.5586 | 1252.3396 |
| 1279.5501  | 1349.5924 | 1394.7281 | 1408.9409 | 1469.4682 | 1474.4322 | 1487.9111 |
| 1490.4486  | 1495.9341 | 1737.9978 | 2991.4160 | 2996.3372 | 3011.0832 | 3067.1014 |
| 3072.6199  | 3076.4448 | 3107.4691 | 3120.4451 |           |           |           |

== Thermochemistry energies (hartree) ==

|         |             |                                 |
|---------|-------------|---------------------------------|
| ZPVE =  | 0.119861    | (after scaling by 0.9854)       |
| G4 Ee = | -308.042287 | (total electronic energy)       |
| G4 U0 = | -307.922426 | (Zero-kelvin internal energy)   |
| G4 UT = | -307.915363 | (Internal energy at 298.15 K)   |
| G4 HT = | -307.914419 | (Enthalpy at 298.15 K)          |
| G4 GT = | -307.953520 | (Gibbs free energy at 298.15 K) |

Species 7: Transition state along  $\text{ROO}\cdot \xrightarrow{\text{TS}_2} \text{alkene} + \cdot\text{OOH}$

[ G4 data ]

== B3LYP/6-31G(2df,p) equilibrium geometry (Angstrom) ==

|   |           |           |           |
|---|-----------|-----------|-----------|
| C | 0.115711  | -0.000014 | 1.258184  |
| H | 0.384200  | 0.918358  | 1.767052  |
| H | 0.384194  | -0.918398 | 1.767034  |
| C | -0.704316 | -0.000001 | 0.132987  |
| H | 0.347260  | -0.000002 | -0.678183 |
| C | -1.428637 | 1.288139  | -0.255612 |
| H | -1.611592 | 1.332325  | -1.334249 |
| H | -2.403957 | 1.353066  | 0.241819  |
| H | -0.848593 | 2.172747  | 0.022869  |
| C | -1.428653 | -1.288126 | -0.255631 |
| H | -1.611611 | -1.332293 | -1.334268 |
| H | -0.848617 | -2.172745 | 0.022834  |
| H | -2.403972 | -1.353051 | 0.241802  |
| O | 2.047017  | -0.000005 | 0.220145  |
| O | 1.613990  | 0.000006  | -0.969680 |

== B3LYP/6-31G(2df,p) harmonic frequencies (cm<sup>-1</sup>) ==

|           |           |           |           |           |           |           |
|-----------|-----------|-----------|-----------|-----------|-----------|-----------|
| -950.6294 | 119.7196  | 180.4092  | 192.5747  | 207.7188  | 253.0803  | 364.0117  |
| 381.1310  | 413.4499  | 550.6950  | 674.2667  | 763.3960  | 844.6197  | 944.6406  |
| 968.2937  | 990.5986  | 1018.4501 | 1074.6805 | 1131.1452 | 1203.5498 | 1284.0201 |
| 1358.8595 | 1404.8451 | 1413.1960 | 1422.6891 | 1479.8161 | 1492.6723 | 1496.3667 |
| 1506.1855 | 1581.8663 | 1595.6181 | 3023.6967 | 3027.2550 | 3084.4242 | 3085.9598 |
| 3108.9058 | 3110.4416 | 3161.7787 | 3249.9752 |           |           |           |

== Thermochemistry energies (hartree) ==

|         |             |                                 |
|---------|-------------|---------------------------------|
| ZPVE =  | 0.119350    | (after scaling by 0.9854)       |
| G4 Ee = | -308.040364 | (total electronic energy)       |
| G4 U0 = | -307.921014 | (Zero-kelvin internal energy)   |
| G4 UT = | -307.913479 | (Internal energy at 298.15 K)   |
| G4 HT = | -307.912535 | (Enthalpy at 298.15 K)          |
| G4 GT = | -307.952736 | (Gibbs free energy at 298.15 K) |

Species 8: Transition state along  $\cdot\text{QOOH} \xrightarrow{\text{TS}_3} \text{alkene} + \cdot\text{OOH}$

[ G4 data ]

== B3LYP/6-31G(2df,p) equilibrium geometry (Angstrom) ==

|   |           |           |           |
|---|-----------|-----------|-----------|
| C | 0.067543  | -0.566426 | 0.992406  |
| H | 0.625698  | 0.036072  | 1.699395  |
| H | 0.039604  | -1.630210 | 1.204593  |
| C | -0.943878 | 0.006199  | 0.247711  |
| H | 1.911568  | 0.789152  | -1.177612 |
| C | -1.047901 | 1.494681  | 0.098807  |
| H | -0.893896 | 1.800786  | -0.946845 |
| H | -2.050512 | 1.852963  | 0.369894  |
| H | -0.315438 | 2.019865  | 0.715708  |
| C | -1.888834 | -0.827839 | -0.564770 |
| H | -1.752938 | -0.649798 | -1.640966 |
| H | -1.752338 | -1.896428 | -0.382007 |
| H | -2.933505 | -0.570818 | -0.343081 |
| O | 1.547220  | -0.760972 | -0.205042 |
| O | 2.202803  | 0.462063  | -0.312959 |

== B3LYP/6-31G(2df,p) harmonic frequencies (cm<sup>-1</sup>) ==

|           |           |           |           |           |           |           |
|-----------|-----------|-----------|-----------|-----------|-----------|-----------|
| -503.5521 | 57.1086   | 96.4916   | 117.4642  | 129.9719  | 173.0104  | 296.8305  |
| 370.7338  | 419.0716  | 436.3775  | 454.0490  | 802.2964  | 874.7200  | 940.6463  |
| 964.2687  | 982.7503  | 1031.8056 | 1056.5409 | 1071.4588 | 1075.4406 | 1308.0317 |
| 1391.8988 | 1399.9264 | 1404.4085 | 1414.5751 | 1464.2157 | 1476.7322 | 1481.4100 |
| 1496.8874 | 1557.9665 | 2994.4002 | 3004.3717 | 3036.3261 | 3044.5403 | 3115.2055 |
| 3120.4182 | 3147.0915 | 3234.8475 | 3703.7634 |           |           |           |

== Thermochemistry energies (hartree) ==

|         |             |                                 |
|---------|-------------|---------------------------------|
| ZPVE =  | 0.121557    | (after scaling by 0.9854)       |
| G4 Ee = | -308.049384 | (total electronic energy)       |
| G4 U0 = | -307.927827 | (Zero-kelvin internal energy)   |
| G4 UT = | -307.919340 | (Internal energy at 298.15 K)   |
| G4 HT = | -307.918396 | (Enthalpy at 298.15 K)          |
| G4 GT = | -307.961625 | (Gibbs free energy at 298.15 K) |



Species 9: Transition state along  $\cdot\text{QOOH} \xrightarrow{\text{TS4}} \text{cycloether} + \cdot\text{OH}$

[ G4 data ]

== B3LYP/6-31G(2df,p) equilibrium geometry (Angstrom) ==

|   |           |           |           |
|---|-----------|-----------|-----------|
| C | 0.369856  | -0.045266 | 0.889691  |
| H | 0.615820  | 0.840185  | 1.489502  |
| H | 0.567986  | -0.961232 | 1.460835  |
| C | -0.927765 | 0.003336  | 0.179553  |
| H | 2.802991  | 0.684055  | -0.785927 |
| C | -1.546771 | 1.315957  | -0.161044 |
| H | -1.890487 | 1.345794  | -1.201454 |
| H | -2.435614 | 1.489760  | 0.465818  |
| H | -0.854061 | 2.143589  | 0.004235  |
| C | -1.605870 | -1.261315 | -0.223851 |
| H | -1.972642 | -1.215272 | -1.255554 |
| H | -0.940613 | -2.121240 | -0.125659 |
| H | -2.486409 | -1.439124 | 0.413770  |
| O | 0.935896  | -0.041339 | -0.384809 |
| O | 2.671145  | -0.064009 | -0.186649 |

== B3LYP/6-31G(2df,p) harmonic frequencies (cm<sup>-1</sup>) ==

|           |           |           |           |           |           |           |
|-----------|-----------|-----------|-----------|-----------|-----------|-----------|
| -683.5304 | 80.1715   | 102.6319  | 117.5234  | 148.6187  | 190.7589  | 205.2384  |
| 283.8381  | 383.3714  | 400.3470  | 430.8313  | 764.9930  | 923.3340  | 944.9503  |
| 975.6729  | 995.7349  | 1016.3299 | 1050.9799 | 1108.1678 | 1177.5046 | 1283.6137 |
| 1312.6355 | 1366.1317 | 1400.4501 | 1408.4072 | 1458.9490 | 1473.5422 | 1476.8282 |
| 1497.6605 | 1535.5182 | 2987.6079 | 2992.6064 | 3003.9902 | 3053.5986 | 3058.1142 |
| 3061.6626 | 3127.8008 | 3131.5063 | 3784.5739 |           |           |           |

== Thermochemistry energies (hartree) ==

|         |             |                                 |
|---------|-------------|---------------------------------|
| ZPVE =  | 0.120588    | (after scaling by 0.9854)       |
| G4 Ee = | -308.053652 | (total electronic energy)       |
| G4 U0 = | -307.933064 | (Zero-kelvin internal energy)   |
| G4 UT = | -307.924386 | (Internal energy at 298.15 K)   |
| G4 HT = | -307.923442 | (Enthalpy at 298.15 K)          |
| G4 GT = | -307.966710 | (Gibbs free energy at 298.15 K) |

# Hydrocarbon 4: tertbutyl

## Species 1: ·R

[ G4 data ]

== B3LYP/6-31G(2df,p) equilibrium geometry (Angstrom) ==

|   |           |           |           |
|---|-----------|-----------|-----------|
| C | 1.264664  | 0.783864  | 0.013355  |
| C | 0.000008  | -0.000005 | -0.134946 |
| C | 0.046515  | -1.487151 | 0.013542  |
| C | -1.311181 | 0.703292  | 0.013307  |
| H | 1.182679  | 1.777723  | -0.441884 |
| H | 2.118254  | 0.268315  | -0.441971 |
| H | 1.532720  | 0.949937  | 1.073161  |
| H | -0.826852 | -1.968649 | -0.441553 |
| H | 0.056521  | -1.802185 | 1.073391  |
| H | 0.948116  | -1.913172 | -0.441812 |
| H | -1.291483 | 1.700313  | -0.441980 |
| H | -1.589123 | 0.852341  | 1.073101  |
| H | -2.130871 | 0.135376  | -0.442000 |

== B3LYP/6-31G(2df,p) harmonic frequencies (cm<sup>-1</sup>) ==

|           |           |           |           |           |           |           |
|-----------|-----------|-----------|-----------|-----------|-----------|-----------|
| 123.2728  | 123.6089  | 131.2708  | 252.2070  | 376.4529  | 376.6554  | 757.2497  |
| 938.6131  | 938.7280  | 969.4987  | 1008.9608 | 1008.9803 | 1092.0314 | 1295.4554 |
| 1295.5099 | 1395.6215 | 1395.7256 | 1425.7090 | 1469.1104 | 1469.2087 | 1469.4898 |
| 1486.6754 | 1493.5898 | 1493.6417 | 2931.9480 | 2931.9841 | 2941.2324 | 3036.1472 |
| 3036.2000 | 3039.1111 | 3081.3068 | 3086.1657 | 3086.2203 |           |           |

== Thermochemistry energies (hartree) ==

|         |             |                                 |
|---------|-------------|---------------------------------|
| ZPVE =  | 0.114395    | (after scaling by 0.9854)       |
| G4 Ee = | -157.760072 | (total electronic energy)       |
| G4 U0 = | -157.645677 | (Zero-kelvin internal energy)   |
| G4 UT = | -157.639188 | (Internal energy at 298.15 K)   |
| G4 HT = | -157.638243 | (Enthalpy at 298.15 K)          |
| G4 GT = | -157.675341 | (Gibbs free energy at 298.15 K) |

## Species 2: ROO·

[ G4 data ]

== B3LYP/6-31G(2df,p) equilibrium geometry (Angstrom) ==

|   |           |           |           |
|---|-----------|-----------|-----------|
| C | -0.670221 | 0.665848  | 1.268616  |
| C | 0.115893  | 0.347516  | 0.000000  |
| C | 1.507894  | 0.970390  | 0.000000  |
| C | -0.670221 | 0.665848  | -1.268616 |
| H | -0.902855 | 1.734023  | 1.306737  |
| H | -0.091129 | 0.406699  | 2.159548  |
| H | -1.605285 | 0.102352  | 1.282588  |
| H | 1.428151  | 2.060982  | 0.000000  |
| H | 2.070016  | 0.666564  | -0.887370 |
| H | 2.070016  | 0.666564  | 0.887370  |
| O | 0.411507  | -1.116860 | 0.000000  |
| H | -0.091129 | 0.406699  | -2.159548 |
| H | -0.902855 | 1.734023  | -1.306737 |
| H | -1.605285 | 0.102352  | -1.282588 |
| O | -0.670221 | -1.855374 | -0.000000 |

== B3LYP/6-31G(2df,p) harmonic frequencies (cm<sup>-1</sup>) ==

|           |           |           |           |           |           |           |
|-----------|-----------|-----------|-----------|-----------|-----------|-----------|
| 126.0559  | 172.5711  | 224.9672  | 239.4009  | 269.9578  | 328.9661  | 359.6683  |
| 399.2484  | 435.6013  | 545.1539  | 736.3890  | 807.3895  | 927.7066  | 929.5238  |
| 965.2009  | 1037.6505 | 1052.2053 | 1181.0712 | 1233.3776 | 1260.8641 | 1293.3529 |
| 1392.9396 | 1397.1767 | 1422.5851 | 1466.9053 | 1485.0800 | 1486.3781 | 1494.4812 |
| 1495.5415 | 1519.1530 | 3044.5444 | 3045.4914 | 3051.6080 | 3115.9037 | 3118.0949 |
| 3123.0115 | 3125.2736 | 3136.1547 | 3140.0017 |           |           |           |

== Thermochemistry energies (hartree) ==

|         |             |                                 |
|---------|-------------|---------------------------------|
| ZPVE =  | 0.124787    | (after scaling by 0.9854)       |
| G4 Ee = | -308.108400 | (total electronic energy)       |
| G4 U0 = | -307.983613 | (Zero-kelvin internal energy)   |
| G4 UT = | -307.975927 | (Internal energy at 298.15 K)   |
| G4 HT = | -307.974983 | (Enthalpy at 298.15 K)          |
| G4 GT = | -308.015061 | (Gibbs free energy at 298.15 K) |

### Species 3: ·QOOH

[ G4 data ]

== B3LYP/6-31G(2df,p) equilibrium geometry (Angstrom) ==

|   |           |           |           |
|---|-----------|-----------|-----------|
| C | 0.276401  | -0.426436 | 1.502048  |
| C | 0.391802  | 0.015927  | 0.078813  |
| C | 1.607920  | -0.625882 | -0.607347 |
| C | 0.409310  | 1.539954  | -0.052448 |
| H | 0.107082  | 0.277965  | 2.307478  |
| H | 0.323437  | -1.484076 | 1.740628  |
| H | 2.530695  | -0.262822 | -0.147709 |
| H | 1.617940  | -0.368749 | -1.670480 |
| H | 1.575652  | -1.714611 | -0.513060 |
| O | -0.703551 | -0.541327 | -0.706093 |
| H | 0.492249  | 1.828656  | -1.103640 |
| H | 1.259439  | 1.959652  | 0.494440  |
| H | -0.511473 | 1.965007  | 0.351621  |
| O | -1.958037 | -0.022160 | -0.218092 |
| H | -2.214917 | -0.714507 | 0.407806  |

== B3LYP/6-31G(2df,p) harmonic frequencies (cm<sup>-1</sup>) ==

|           |           |           |           |           |           |           |
|-----------|-----------|-----------|-----------|-----------|-----------|-----------|
| 113.3800  | 144.3911  | 199.8228  | 235.6051  | 250.7806  | 270.8795  | 324.0567  |
| 350.5107  | 396.4592  | 448.6538  | 493.4824  | 584.9413  | 767.5594  | 838.7171  |
| 912.2380  | 941.2065  | 951.7301  | 981.1233  | 1033.3315 | 1156.2567 | 1261.3016 |
| 1272.4299 | 1385.7908 | 1388.7479 | 1404.9468 | 1456.0994 | 1473.5486 | 1484.6383 |
| 1489.9310 | 1509.3573 | 3042.7800 | 3047.3290 | 3115.9492 | 3121.4435 | 3127.1629 |
| 3137.6074 | 3143.4885 | 3254.9628 | 3741.9395 |           |           |           |

== Thermochemistry energies (hartree) ==

|         |             |                                 |
|---------|-------------|---------------------------------|
| ZPVE =  | 0.121796    | (after scaling by 0.9854)       |
| G4 Ee = | -308.077032 | (total electronic energy)       |
| G4 U0 = | -307.955236 | (Zero-kelvin internal energy)   |
| G4 UT = | -307.946751 | (Internal energy at 298.15 K)   |
| G4 HT = | -307.945807 | (Enthalpy at 298.15 K)          |
| G4 GT = | -307.987380 | (Gibbs free energy at 298.15 K) |

### Species 4: *cy*-ether

[ G4 data ]

== B3LYP/6-31G(2df,p) equilibrium geometry (Angstrom) ==

|   |           |           |           |
|---|-----------|-----------|-----------|
| C | -0.052805 | 0.932113  | 1.283142  |
| C | -0.052805 | 0.130594  | 0.000000  |
| C | -0.576412 | -1.243896 | -0.000000 |
| C | -0.052805 | 0.932113  | -1.283142 |
| H | -0.017656 | 0.271445  | 2.152650  |
| H | -0.950137 | 1.556461  | 1.353379  |
| H | 0.818908  | 1.594574  | 1.321459  |
| H | -0.950137 | 1.556461  | -1.353379 |
| H | -0.017656 | 0.271445  | -2.152650 |
| H | 0.818908  | 1.594574  | -1.321459 |
| O | 0.832730  | -1.000942 | -0.000000 |
| H | -0.977554 | -1.671483 | -0.918593 |
| H | -0.977554 | -1.671483 | 0.918593  |

== B3LYP/6-31G(2df,p) harmonic frequencies (cm<sup>-1</sup>) ==

|           |           |           |           |           |           |           |
|-----------|-----------|-----------|-----------|-----------|-----------|-----------|
| 179.6030  | 217.1014  | 350.5030  | 358.3323  | 406.1078  | 408.5472  | 704.3365  |
| 819.1405  | 904.8970  | 931.7381  | 955.3221  | 1017.9411 | 1076.7892 | 1134.1790 |
| 1149.2917 | 1173.5645 | 1282.5037 | 1394.2902 | 1409.6260 | 1421.4209 | 1473.7738 |
| 1485.9881 | 1493.5316 | 1505.9467 | 1536.4685 | 3031.3025 | 3036.3834 | 3074.7740 |
| 3093.4869 | 3098.3991 | 3122.4915 | 3124.6722 | 3158.3729 |           |           |

== Thermochemistry energies (hartree) ==

|         |             |                                 |
|---------|-------------|---------------------------------|
| ZPVE =  | 0.111192    | (after scaling by 0.9854)       |
| G4 Ee = | -232.384120 | (total electronic energy)       |
| G4 U0 = | -232.272928 | (Zero-kelvin internal energy)   |
| G4 UT = | -232.267081 | (Internal energy at 298.15 K)   |
| G4 HT = | -232.266137 | (Enthalpy at 298.15 K)          |
| G4 GT = | -232.301294 | (Gibbs free energy at 298.15 K) |

## Species 5: alkene

[ G4 data ]

== B3LYP/6-31G(2df,p) equilibrium geometry (Angstrom) ==

|   |           |           |           |
|---|-----------|-----------|-----------|
| C | 1.274947  | -0.677941 | 0.000003  |
| C | 0.000000  | 0.124566  | -0.000002 |
| C | 0.000001  | 1.456978  | -0.000016 |
| C | -1.274949 | -0.677939 | 0.000011  |
| H | 2.159636  | -0.036470 | -0.000009 |
| H | 1.327183  | -1.334165 | -0.878355 |
| H | 1.327191  | -1.334143 | 0.878378  |
| H | -1.327192 | -1.334163 | -0.878347 |
| H | -2.159636 | -0.036467 | 0.000006  |
| H | -1.327187 | -1.334141 | 0.878386  |
| H | 0.923232  | 2.027782  | -0.000025 |
| H | -0.923229 | 2.027784  | -0.000019 |

== B3LYP/6-31G(2df,p) harmonic frequencies (cm<sup>-1</sup>) ==

|           |           |           |           |           |           |           |
|-----------|-----------|-----------|-----------|-----------|-----------|-----------|
| 176.6651  | 213.5577  | 376.2478  | 435.0083  | 442.6857  | 708.8943  | 817.1783  |
| 927.1980  | 962.8198  | 987.0313  | 1023.8777 | 1087.9719 | 1107.6406 | 1295.7868 |
| 1407.9467 | 1413.5192 | 1448.0732 | 1470.7393 | 1483.9391 | 1488.7150 | 1503.0376 |
| 1729.3903 | 3013.1169 | 3018.9421 | 3059.9435 | 3063.1561 | 3114.0538 | 3116.0626 |
| 3141.8320 | 3220.9491 |           |           |           |           |           |

== Thermochemistry energies (hartree) ==

|         |             |                                 |
|---------|-------------|---------------------------------|
| ZPVE =  | 0.106085    | (after scaling by 0.9854)       |
| G4 Ee = | -157.194053 | (total electronic energy)       |
| G4 U0 = | -157.087968 | (Zero-kelvin internal energy)   |
| G4 UT = | -157.082615 | (Internal energy at 298.15 K)   |
| G4 HT = | -157.081671 | (Enthalpy at 298.15 K)          |
| G4 GT = | -157.115288 | (Gibbs free energy at 298.15 K) |

Species 6: Transition state along  $\text{ROO} \cdot \xrightarrow{\text{TS1}} \cdot\text{QOOH}$

[ G4 data ]

== B3LYP/6-31G(2df,p) equilibrium geometry (Angstrom) ==

|   |           |           |           |
|---|-----------|-----------|-----------|
| C | 0.372826  | 0.008355  | 0.040585  |
| C | -0.236138 | -0.498096 | 1.359266  |
| H | -1.476209 | -0.258619 | 0.796129  |
| H | -0.201663 | -1.575562 | 1.522698  |
| H | -0.084873 | 0.095961  | 2.258381  |
| C | 0.560740  | 1.527501  | 0.063677  |
| H | 1.286323  | 1.819802  | 0.829186  |
| H | 0.923609  | 1.875630  | -0.907287 |
| H | -0.391069 | 2.019755  | 0.275106  |
| C | 1.640321  | -0.733387 | -0.372403 |
| H | 1.458265  | -1.809841 | -0.421065 |
| H | 1.979433  | -0.392295 | -1.355563 |
| H | 2.441370  | -0.543791 | 0.348132  |
| O | -0.637794 | -0.364423 | -0.931450 |
| O | -1.857417 | -0.017738 | -0.305109 |

== B3LYP/6-31G(2df,p) harmonic frequencies (cm<sup>-1</sup>) ==

|            |           |           |           |           |           |           |
|------------|-----------|-----------|-----------|-----------|-----------|-----------|
| -2231.4979 | 184.3805  | 195.8098  | 235.3007  | 296.4683  | 334.5726  | 384.9046  |
| 402.6659   | 507.6488  | 567.2536  | 644.0959  | 785.5188  | 842.3258  | 907.8318  |
| 927.1174   | 954.2801  | 966.8381  | 1012.6681 | 1040.7548 | 1100.7052 | 1173.6767 |
| 1248.3147  | 1271.0324 | 1393.6387 | 1409.1623 | 1450.9344 | 1475.5336 | 1484.3728 |
| 1492.5849  | 1506.7166 | 1731.8015 | 3040.5773 | 3045.7138 | 3100.1902 | 3111.6740 |
| 3117.3681  | 3126.1038 | 3134.0792 | 3194.9446 |           |           |           |

== Thermochemistry energies (hartree) ==

|         |             |                                 |
|---------|-------------|---------------------------------|
| ZPVE =  | 0.118530    | (after scaling by 0.9854)       |
| G4 Ee = | -308.043652 | (total electronic energy)       |
| G4 U0 = | -307.925122 | (Zero-kelvin internal energy)   |
| G4 UT = | -307.918063 | (Internal energy at 298.15 K)   |
| G4 HT = | -307.917119 | (Enthalpy at 298.15 K)          |
| G4 GT = | -307.955747 | (Gibbs free energy at 298.15 K) |

Species 7: Transition state along  $\text{ROO}\cdot \xrightarrow{\text{TS}_2} \text{alkene} + \cdot\text{OOH}$

[ G4 data ]

== B3LYP/6-31G(2df,p) equilibrium geometry (Angstrom) ==

|   |           |           |           |
|---|-----------|-----------|-----------|
| C | 0.715738  | 0.000002  | 0.230851  |
| C | 0.069054  | 0.000018  | 1.463942  |
| H | -1.197520 | 0.000015  | 0.960216  |
| H | 0.072095  | -0.917957 | 2.049643  |
| H | 0.072099  | 0.918005  | 2.049622  |
| C | 1.206808  | 1.277295  | -0.386596 |
| H | 2.279120  | 1.397157  | -0.175674 |
| H | 1.088158  | 1.270558  | -1.473463 |
| H | 0.687984  | 2.148859  | 0.019137  |
| C | 1.206805  | -1.277306 | -0.386567 |
| H | 0.687975  | -2.148858 | 0.019183  |
| H | 1.088161  | -1.270591 | -1.473434 |
| H | 2.279115  | -1.397168 | -0.175636 |
| O | -1.236465 | -0.000011 | -0.951247 |
| O | -2.044486 | 0.000002  | 0.035076  |

== B3LYP/6-31G(2df,p) harmonic frequencies (cm<sup>-1</sup>) ==

|            |           |           |           |           |           |           |
|------------|-----------|-----------|-----------|-----------|-----------|-----------|
| -1047.5928 | 129.7085  | 164.8438  | 197.7137  | 202.5941  | 207.6974  | 366.2211  |
| 429.1272   | 444.3645  | 533.0643  | 624.9948  | 654.8688  | 817.8421  | 940.2220  |
| 984.3036   | 1022.4952 | 1025.0516 | 1071.6675 | 1100.2730 | 1274.7115 | 1321.2753 |
| 1339.9119  | 1405.7946 | 1408.9184 | 1427.8819 | 1467.4822 | 1476.6219 | 1482.9129 |
| 1496.5529  | 1578.5098 | 1619.1443 | 3011.5623 | 3016.5243 | 3085.7825 | 3088.7064 |
| 3101.4694  | 3127.4398 | 3129.9137 | 3182.1822 |           |           |           |

== Thermochemistry energies (hartree) ==

|         |             |                                 |
|---------|-------------|---------------------------------|
| ZPVE =  | 0.118891    | (after scaling by 0.9854)       |
| G4 Ee = | -308.053530 | (total electronic energy)       |
| G4 U0 = | -307.934639 | (Zero-kelvin internal energy)   |
| G4 UT = | -307.927030 | (Internal energy at 298.15 K)   |
| G4 HT = | -307.926086 | (Enthalpy at 298.15 K)          |
| G4 GT = | -307.966355 | (Gibbs free energy at 298.15 K) |



Species 8: Transition state along  $\cdot\text{QOOH} \xrightarrow{\text{TS}_3} \text{alkene} + \cdot\text{OOH}$

[ G4 data ]

== B3LYP/6-31G(2df,p) equilibrium geometry (Angstrom) ==

|   |           |           |           |
|---|-----------|-----------|-----------|
| C | 0.655391  | 0.114998  | 0.153529  |
| C | 0.651841  | -0.150869 | 1.517171  |
| H | -2.199375 | 0.541696  | -0.669405 |
| H | 1.051171  | -1.081014 | 1.904207  |
| H | 0.132576  | 0.496999  | 2.214054  |
| C | 0.333834  | 1.511421  | -0.322948 |
| H | 1.215659  | 2.156294  | -0.232603 |
| H | 0.037124  | 1.507776  | -1.376560 |
| H | -0.466639 | 1.957540  | 0.273168  |
| C | 1.557486  | -0.695185 | -0.747638 |
| H | 1.685129  | -1.711784 | -0.368296 |
| H | 1.142390  | -0.751950 | -1.757133 |
| H | 2.547004  | -0.227580 | -0.812365 |
| O | -0.939829 | -0.805023 | -0.360064 |
| O | -2.102215 | -0.141249 | 0.013095  |

== B3LYP/6-31G(2df,p) harmonic frequencies (cm<sup>-1</sup>) ==

|           |           |           |           |           |           |           |
|-----------|-----------|-----------|-----------|-----------|-----------|-----------|
| -499.2560 | 91.7817   | 148.6988  | 188.8117  | 198.3513  | 239.8039  | 314.9821  |
| 382.0992  | 391.3239  | 443.0534  | 451.0363  | 520.8982  | 787.4810  | 795.4557  |
| 944.1816  | 957.3720  | 970.4672  | 1017.6732 | 1060.7209 | 1076.0022 | 1300.4432 |
| 1378.8552 | 1398.4841 | 1408.6609 | 1416.6923 | 1474.0676 | 1485.0029 | 1486.2539 |
| 1506.0389 | 1527.2856 | 3030.7054 | 3036.5057 | 3090.9752 | 3102.7552 | 3117.9343 |
| 3129.2631 | 3153.8546 | 3249.4264 | 3686.5222 |           |           |           |

== Thermochemistry energies (hartree) ==

|         |             |                                 |
|---------|-------------|---------------------------------|
| ZPVE =  | 0.121135    | (after scaling by 0.9854)       |
| G4 Ee = | -308.048454 | (total electronic energy)       |
| G4 U0 = | -307.927319 | (Zero-kelvin internal energy)   |
| G4 UT = | -307.919131 | (Internal energy at 298.15 K)   |
| G4 HT = | -307.918186 | (Enthalpy at 298.15 K)          |
| G4 GT = | -307.959591 | (Gibbs free energy at 298.15 K) |

Species 9: Transition state along  $\cdot\text{QOOH} \xrightarrow{\text{TS4}} \text{cycloether} + \cdot\text{OH}$

[ G4 data ]

== B3LYP/6-31G(2df,p) equilibrium geometry (Angstrom) ==

|   |           |           |           |
|---|-----------|-----------|-----------|
| C | 0.485965  | 0.045591  | 0.032172  |
| C | 1.266556  | -1.198657 | -0.179346 |
| H | -2.450303 | -0.532641 | 0.482831  |
| H | 1.591359  | -1.479354 | -1.172988 |
| H | 1.407715  | -1.898260 | 0.634468  |
| C | 0.433215  | 0.550378  | 1.469510  |
| H | 1.351356  | 1.084647  | 1.732291  |
| H | -0.415487 | 1.229279  | 1.578821  |
| H | 0.300981  | -0.283015 | 2.165628  |
| C | 0.703056  | 1.154051  | -0.990371 |
| H | 0.724776  | 0.740947  | -2.002170 |
| H | -0.120453 | 1.869982  | -0.930370 |
| H | 1.642704  | 1.683020  | -0.801943 |
| O | -0.598535 | -0.797886 | -0.298478 |
| O | -2.072139 | 0.082538  | -0.161317 |

== B3LYP/6-31G(2df,p) harmonic frequencies (cm<sup>-1</sup>) ==

|           |           |           |           |           |           |           |
|-----------|-----------|-----------|-----------|-----------|-----------|-----------|
| -747.0767 | 112.2816  | 183.9330  | 198.5332  | 211.2047  | 241.9407  | 332.8771  |
| 347.3695  | 399.4794  | 407.4408  | 477.4378  | 534.1167  | 743.0905  | 759.8824  |
| 878.3086  | 909.0007  | 952.2113  | 987.2751  | 1025.8250 | 1038.6092 | 1159.9725 |
| 1264.9142 | 1330.8419 | 1395.1037 | 1407.1728 | 1461.8071 | 1470.9165 | 1487.3514 |
| 1496.2527 | 1508.7835 | 3040.5299 | 3045.8839 | 3113.1257 | 3118.4283 | 3129.4457 |
| 3133.9574 | 3165.9413 | 3284.8293 | 3785.0211 |           |           |           |

== Thermochemistry energies (hartree) ==

|         |             |                                 |
|---------|-------------|---------------------------------|
| ZPVE =  | 0.120195    | (after scaling by 0.9854)       |
| G4 Ee = | -308.054482 | (total electronic energy)       |
| G4 U0 = | -307.934287 | (Zero-kelvin internal energy)   |
| G4 UT = | -307.926141 | (Internal energy at 298.15 K)   |
| G4 HT = | -307.925197 | (Enthalpy at 298.15 K)          |
| G4 GT = | -307.966177 | (Gibbs free energy at 298.15 K) |

# Hydrocarbon 5: neopentyl

## Species 1: ·R

[ G4 data ]

== B3LYP/6-31G(2df,p) equilibrium geometry (Angstrom) ==

|   |           |           |           |
|---|-----------|-----------|-----------|
| C | -0.000001 | 1.327303  | -0.747447 |
| C | 0.000000  | -0.001428 | 0.054926  |
| C | 1.260900  | -0.808472 | -0.314136 |
| C | -1.260899 | -0.808474 | -0.314136 |
| C | -0.000000 | 0.303555  | 1.523194  |
| H | 0.885036  | 1.927597  | -0.514074 |
| H | -0.885039 | 1.927596  | -0.514074 |
| H | -0.000001 | 1.126867  | -1.825838 |
| H | 0.928479  | 0.509853  | 2.045474  |
| H | -0.928479 | 0.509853  | 2.045474  |
| H | -2.170734 | -0.254196 | -0.059226 |
| H | -1.287893 | -1.762520 | 0.221893  |
| H | -1.289093 | -1.021621 | -1.388353 |
| H | 2.170734  | -0.254192 | -0.059227 |
| H | 1.289094  | -1.021619 | -1.388353 |
| H | 1.287896  | -1.762518 | 0.221893  |

== B3LYP/6-31G(2df,p) harmonic frequencies (cm<sup>-1</sup>) ==

|           |           |           |           |           |           |           |
|-----------|-----------|-----------|-----------|-----------|-----------|-----------|
| 108.8434  | 214.9250  | 267.1957  | 273.5449  | 304.0713  | 326.6916  | 382.7231  |
| 410.3325  | 412.2809  | 534.1308  | 739.0901  | 908.3338  | 914.5118  | 948.0851  |
| 949.5275  | 956.9399  | 1030.8638 | 1076.2013 | 1202.0073 | 1265.8686 | 1277.4661 |
| 1388.8223 | 1395.4537 | 1417.5476 | 1463.5088 | 1476.6626 | 1483.5356 | 1485.4398 |
| 1500.6950 | 1501.8751 | 1517.3833 | 3018.6206 | 3023.2768 | 3029.3599 | 3087.5817 |
| 3091.6276 | 3096.4831 | 3097.9181 | 3102.6619 | 3104.3333 | 3136.0195 | 3239.9475 |

== Thermochemistry energies (hartree) ==

|         |             |                                 |
|---------|-------------|---------------------------------|
| ZPVE =  | 0.141794    | (after scaling by 0.9854)       |
| G4 Ee = | -197.062310 | (total electronic energy)       |
| G4 U0 = | -196.920516 | (Zero-kelvin internal energy)   |
| G4 UT = | -196.913009 | (Internal energy at 298.15 K)   |
| G4 HT = | -196.912065 | (Enthalpy at 298.15 K)          |
| G4 GT = | -196.950975 | (Gibbs free energy at 298.15 K) |

## Species 2: ROO·

[ G4 data ]

== B3LYP/6-31G(2df,p) equilibrium geometry (Angstrom) ==

|   |           |           |           |
|---|-----------|-----------|-----------|
| C | 1.031340  | -0.954656 | 1.158476  |
| C | 0.740929  | 0.031559  | 0.012901  |
| C | 1.943159  | 0.086254  | -0.948526 |
| C | 0.463499  | 1.434591  | 0.579359  |
| C | -0.460430 | -0.464470 | -0.809507 |
| H | 1.255373  | -1.956030 | 0.774073  |
| H | 0.177052  | -1.036749 | 1.835999  |
| H | 1.895326  | -0.619728 | 1.741314  |
| H | -0.721579 | 0.227160  | -1.613862 |
| H | -0.266128 | -1.462048 | -1.217512 |
| H | -0.399436 | 1.434272  | 1.250049  |
| H | 0.262776  | 2.154425  | -0.220804 |
| H | 1.331651  | 1.790596  | 1.144017  |
| H | 2.166081  | -0.899971 | -1.370538 |
| H | 2.836764  | 0.430900  | -0.418552 |
| H | 1.761646  | 0.777242  | -1.778999 |
| O | -1.653556 | -0.636250 | 0.004260  |
| O | -2.422758 | 0.431283  | -0.014435 |

== B3LYP/6-31G(2df,p) harmonic frequencies (cm<sup>-1</sup>) ==

|           |           |           |           |           |           |           |
|-----------|-----------|-----------|-----------|-----------|-----------|-----------|
| 71.0672   | 105.9698  | 208.5114  | 230.3362  | 259.0705  | 265.3123  | 305.0684  |
| 334.7490  | 388.1753  | 403.4789  | 473.9095  | 560.7057  | 741.0184  | 887.2920  |
| 917.9428  | 936.2692  | 945.2184  | 962.1148  | 964.7476  | 1047.4077 | 1085.2796 |
| 1175.3989 | 1233.4666 | 1251.7446 | 1275.7094 | 1319.2327 | 1367.7606 | 1400.1459 |
| 1403.4345 | 1434.2694 | 1464.7903 | 1478.7436 | 1484.0297 | 1487.1887 | 1505.6944 |
| 1506.0226 | 1518.3309 | 3025.4825 | 3030.6918 | 3036.5259 | 3050.6099 | 3093.1071 |
| 3096.9592 | 3098.7771 | 3103.8421 | 3115.1956 | 3120.1131 | 3121.5613 |           |

== Thermochemistry energies (hartree) ==

|         |             |                                 |
|---------|-------------|---------------------------------|
| ZPVE =  | 0.153310    | (after scaling by 0.9854)       |
| G4 Ee = | -347.407740 | (total electronic energy)       |
| G4 U0 = | -347.254430 | (Zero-kelvin internal energy)   |
| G4 UT = | -347.245569 | (Internal energy at 298.15 K)   |
| G4 HT = | -347.244625 | (Enthalpy at 298.15 K)          |
| G4 GT = | -347.287973 | (Gibbs free energy at 298.15 K) |

### Species 3: ·QOOH

[ G4 data ]

== B3LYP/6-31G(2df,p) equilibrium geometry (Angstrom) ==

|   |           |           |           |
|---|-----------|-----------|-----------|
| C | 1.058956  | -0.795635 | 1.261815  |
| C | 0.750427  | 0.070645  | 0.027621  |
| C | 1.989039  | 0.117309  | -0.907068 |
| C | 0.389655  | 1.466929  | 0.439461  |
| C | -0.399121 | -0.580378 | -0.786791 |
| H | 1.388161  | -1.796984 | 0.964601  |
| H | 0.170998  | -0.907675 | 1.889365  |
| H | 1.854964  | -0.345675 | 1.863834  |
| H | -0.618907 | -0.000107 | -1.691078 |
| H | -0.104071 | -1.595535 | -1.081678 |
| H | -1.828761 | 0.959240  | 0.675492  |
| H | 0.075829  | 2.188022  | -0.309390 |
| H | 0.687815  | 1.850989  | 1.409651  |
| H | 2.261905  | -0.891576 | -1.238529 |
| H | 2.849418  | 0.546707  | -0.385928 |
| H | 1.794204  | 0.727021  | -1.795212 |
| O | -1.594058 | -0.774146 | -0.048382 |
| O | -2.314103 | 0.473191  | -0.015537 |

== B3LYP/6-31G(2df,p) harmonic frequencies (cm<sup>-1</sup>) ==

|           |           |           |           |           |           |           |
|-----------|-----------|-----------|-----------|-----------|-----------|-----------|
| 87.2033   | 165.1329  | 179.9923  | 217.8994  | 242.9359  | 258.0843  | 290.5005  |
| 336.8659  | 358.8319  | 394.8861  | 398.5728  | 456.1117  | 557.6268  | 627.7745  |
| 759.4759  | 876.2293  | 898.9845  | 931.1946  | 950.3799  | 953.3950  | 1013.4022 |
| 1027.7867 | 1064.3348 | 1166.8421 | 1242.7676 | 1254.4294 | 1325.2228 | 1371.1990 |
| 1391.6466 | 1413.0373 | 1422.6122 | 1449.7288 | 1466.0289 | 1483.4954 | 1489.0000 |
| 1501.2830 | 1508.6335 | 3017.6678 | 3024.7557 | 3035.0804 | 3073.2178 | 3093.7165 |
| 3100.4292 | 3110.1718 | 3119.1926 | 3132.3407 | 3236.7064 | 3620.5148 |           |

== Thermochemistry energies (hartree) ==

|         |             |                                 |
|---------|-------------|---------------------------------|
| ZPVE =  | 0.150627    | (after scaling by 0.9854)       |
| G4 Ee = | -347.377975 | (total electronic energy)       |
| G4 U0 = | -347.227348 | (Zero-kelvin internal energy)   |
| G4 UT = | -347.218009 | (Internal energy at 298.15 K)   |
| G4 HT = | -347.217065 | (Enthalpy at 298.15 K)          |
| G4 GT = | -347.260839 | (Gibbs free energy at 298.15 K) |

## Species 4: *cy*-ether

[ G4 data ]

== B3LYP/6-31G(2df,p) equilibrium geometry (Angstrom) ==

|   |           |           |           |
|---|-----------|-----------|-----------|
| C | 1.260971  | 1.234725  | 0.000000  |
| C | -0.018871 | 0.401496  | 0.000000  |
| C | -1.266125 | 1.280025  | 0.000000  |
| C | -0.018871 | -0.755505 | 1.035261  |
| C | -0.018871 | -0.755505 | -1.035261 |
| H | 1.310190  | 1.879850  | -0.884691 |
| H | 2.149910  | 0.595683  | 0.000000  |
| H | 1.310190  | 1.879850  | 0.884691  |
| H | -0.941948 | -0.854767 | -1.622703 |
| H | 0.840768  | -0.790918 | -1.716928 |
| H | -1.291317 | 1.927512  | -0.884033 |
| H | -1.291317 | 1.927512  | 0.884033  |
| H | -2.179524 | 0.676493  | 0.000000  |
| O | 0.070603  | -1.753368 | 0.000000  |
| H | -0.941948 | -0.854767 | 1.622703  |
| H | 0.840768  | -0.790918 | 1.716928  |

== B3LYP/6-31G(2df,p) harmonic frequencies (cm<sup>-1</sup>) ==

|           |           |           |           |           |           |           |
|-----------|-----------|-----------|-----------|-----------|-----------|-----------|
| 28.6333   | 219.3045  | 256.1844  | 311.0449  | 338.3020  | 387.5222  | 404.7938  |
| 639.5212  | 854.4911  | 884.4220  | 927.6825  | 937.9738  | 963.4545  | 973.1452  |
| 1026.3975 | 1042.2966 | 1062.6307 | 1157.5666 | 1162.2205 | 1219.8074 | 1267.1305 |
| 1294.0793 | 1311.5138 | 1381.8290 | 1404.2603 | 1425.8525 | 1485.3019 | 1487.9024 |
| 1501.5666 | 1503.5411 | 1517.7734 | 1538.1478 | 2992.3117 | 3003.0006 | 3020.5041 |
| 3026.7430 | 3040.9596 | 3042.5344 | 3085.9390 | 3090.9349 | 3097.3005 | 3099.4677 |

== Thermochemistry energies (hartree) ==

|         |             |                                 |
|---------|-------------|---------------------------------|
| ZPVE =  | 0.140118    | (after scaling by 0.9854)       |
| G4 Ee = | -271.686562 | (total electronic energy)       |
| G4 U0 = | -271.546444 | (Zero-kelvin internal energy)   |
| G4 UT = | -271.539570 | (Internal energy at 298.15 K)   |
| G4 HT = | -271.538626 | (Enthalpy at 298.15 K)          |
| G4 GT = | -271.577463 | (Gibbs free energy at 298.15 K) |

## Species 5: alkene

[ G4 data ]

== B3LYP/6-31G(2df,p) equilibrium geometry (Angstrom) ==

|   |           |           |           |
|---|-----------|-----------|-----------|
| C | -0.325409 | 0.915297  | 1.275407  |
| C | -0.050548 | 0.142166  | 0.000000  |
| C | -0.325409 | 0.915297  | -1.275407 |
| C | -0.325409 | -1.342603 | -0.000000 |
| C | 1.099908  | -0.835867 | -0.000000 |
| H | 0.291689  | 1.820219  | 1.330407  |
| H | -0.110892 | 0.311918  | 2.163089  |
| H | -1.375252 | 1.227584  | 1.330414  |
| H | 0.291689  | 1.820219  | -1.330407 |
| H | -1.375252 | 1.227584  | -1.330414 |
| H | -0.110892 | 0.311918  | -2.163089 |
| H | 1.680279  | -0.947242 | 0.910105  |
| H | 1.680279  | -0.947242 | -0.910105 |
| H | -0.705220 | -1.795349 | -0.910105 |
| H | -0.705220 | -1.795349 | 0.910105  |

== B3LYP/6-31G(2df,p) harmonic frequencies (cm<sup>-1</sup>) ==

|           |           |           |           |           |           |           |
|-----------|-----------|-----------|-----------|-----------|-----------|-----------|
| 215.9368  | 241.7437  | 325.9036  | 348.4854  | 357.0697  | 393.0891  | 688.9301  |
| 786.0570  | 853.8812  | 896.0332  | 949.2381  | 951.2559  | 974.3221  | 1047.4254 |
| 1066.9667 | 1077.4372 | 1093.2575 | 1158.7847 | 1187.9761 | 1319.4493 | 1353.2494 |
| 1411.7120 | 1425.2540 | 1468.5277 | 1481.3189 | 1493.8431 | 1500.4731 | 1501.8576 |
| 1517.4532 | 3016.0462 | 3020.9301 | 3074.9091 | 3078.0182 | 3095.2401 | 3097.6902 |
| 3123.3827 | 3128.4574 | 3200.5679 | 3215.2747 |           |           |           |

== Thermochemistry energies (hartree) ==

|         |             |                                 |
|---------|-------------|---------------------------------|
| ZPVE =  | 0.135003    | (after scaling by 0.9854)       |
| G4 Ee = | -196.490148 | (total electronic energy)       |
| G4 U0 = | -196.355145 | (Zero-kelvin internal energy)   |
| G4 UT = | -196.349127 | (Internal energy at 298.15 K)   |
| G4 HT = | -196.348183 | (Enthalpy at 298.15 K)          |
| G4 GT = | -196.383513 | (Gibbs free energy at 298.15 K) |

Species 6: Transition state along  $\text{ROO} \cdot \xrightarrow{\text{TS1}} \cdot\text{QOOH}$

[ G4 data ]

== B3LYP/6-31G(2df,p) equilibrium geometry (Angstrom) ==

|   |           |           |           |
|---|-----------|-----------|-----------|
| C | 0.707621  | 0.050795  | 0.025585  |
| C | 0.155263  | 1.381000  | 0.498056  |
| H | 0.358657  | 1.668153  | 1.528742  |
| H | 0.208694  | 2.209586  | -0.209104 |
| H | -1.223708 | 1.089792  | 0.445048  |
| C | 1.053353  | -0.845661 | 1.227089  |
| H | 0.164997  | -1.039709 | 1.833694  |
| H | 1.453621  | -1.809738 | 0.895174  |
| H | 1.807755  | -0.369639 | 1.861566  |
| C | 1.946795  | 0.256023  | -0.872942 |
| H | 2.319164  | -0.704687 | -1.246667 |
| H | 1.713831  | 0.889239  | -1.735130 |
| H | 2.755409  | 0.734304  | -0.312339 |
| C | -0.388279 | -0.653030 | -0.835716 |
| H | -0.577274 | -0.091908 | -1.759244 |
| H | -0.089781 | -1.678456 | -1.078457 |
| O | -2.131098 | 0.519684  | 0.034157  |
| O | -1.586388 | -0.773646 | -0.093621 |

== B3LYP/6-31G(2df,p) harmonic frequencies (cm<sup>-1</sup>) ==

|            |           |           |           |           |           |           |
|------------|-----------|-----------|-----------|-----------|-----------|-----------|
| -1605.6490 | 108.1243  | 224.5915  | 244.1848  | 273.4482  | 304.0114  | 322.7042  |
| 387.6454   | 427.3557  | 451.9003  | 484.9495  | 543.5839  | 645.4734  | 760.9019  |
| 882.1819   | 919.7971  | 939.4532  | 946.1228  | 968.3819  | 999.0851  | 1029.0634 |
| 1049.6840  | 1070.6299 | 1121.3092 | 1202.3877 | 1225.8430 | 1245.8331 | 1310.6409 |
| 1358.8456  | 1395.0754 | 1414.9614 | 1455.5571 | 1466.1439 | 1485.4191 | 1491.9985 |
| 1502.2175  | 1508.6928 | 1590.9000 | 3021.6921 | 3027.2940 | 3034.8578 | 3089.1816 |
| 3091.2640  | 3095.5801 | 3100.8652 | 3108.2014 | 3121.1036 | 3180.4491 |           |

== Thermochemistry energies (hartree) ==

|         |             |                                 |
|---------|-------------|---------------------------------|
| ZPVE =  | 0.147332    | (after scaling by 0.9854)       |
| G4 Ee = | -347.361867 | (total electronic energy)       |
| G4 U0 = | -347.214535 | (Zero-kelvin internal energy)   |
| G4 UT = | -347.206575 | (Internal energy at 298.15 K)   |
| G4 HT = | -347.205631 | (Enthalpy at 298.15 K)          |
| G4 GT = | -347.246559 | (Gibbs free energy at 298.15 K) |



Species 7: Transition state along  $\text{ROO} \cdot \xrightarrow{\text{TS}_2} \text{alkene} + \cdot\text{OOH}$

[ G4 data ]

== B3LYP/6-31G(2df,p) equilibrium geometry (Angstrom) ==

|   |           |           |           |
|---|-----------|-----------|-----------|
| C | 0.031913  | -0.000044 | -0.941171 |
| H | 0.418042  | 0.920243  | -1.354649 |
| H | 0.418031  | -0.920370 | -1.354573 |
| C | -1.120674 | -0.000001 | -0.041159 |
| C | -0.004454 | 0.000019  | 1.036315  |
| H | -0.046919 | -0.910747 | 1.637091  |
| H | 1.209505  | 0.000044  | 0.800401  |
| H | -0.046941 | 0.910793  | 1.637079  |
| C | -1.967402 | -1.269469 | -0.051895 |
| H | -2.613986 | -1.309104 | 0.831076  |
| H | -2.606181 | -1.304493 | -0.941146 |
| H | -1.340051 | -2.166300 | -0.051616 |
| O | 2.607255  | 0.000043  | 0.589778  |
| O | 2.559806  | -0.000045 | -0.682576 |
| C | -1.967366 | 1.269491  | -0.051973 |
| H | -2.606153 | 1.304472  | -0.941220 |
| H | -2.613940 | 1.309203  | 0.831002  |
| H | -1.339990 | 2.166304  | -0.051762 |

== B3LYP/6-31G(2df,p) harmonic frequencies (cm<sup>-1</sup>) ==

|            |           |           |           |           |           |           |
|------------|-----------|-----------|-----------|-----------|-----------|-----------|
| -1197.7290 | 47.6764   | 88.8905   | 161.5293  | 225.5008  | 239.4134  | 296.1958  |
| 325.1977   | 347.0991  | 402.1830  | 425.7155  | 457.9610  | 467.5945  | 717.3041  |
| 756.3570   | 840.8098  | 867.8665  | 926.3670  | 950.3572  | 955.4542  | 979.4916  |
| 1006.4199  | 1044.9811 | 1068.7682 | 1189.1560 | 1266.6604 | 1331.1664 | 1344.6917 |
| 1400.7154  | 1418.7140 | 1419.7343 | 1425.3798 | 1474.1593 | 1484.0381 | 1489.8701 |
| 1503.8453  | 1511.3359 | 1697.1889 | 3027.1118 | 3031.5950 | 3051.1331 | 3096.4920 |
| 3100.9060  | 3103.6402 | 3106.3536 | 3150.4408 | 3196.6449 | 3305.1083 |           |

== Thermochemistry energies (hartree) ==

|         |             |                                 |
|---------|-------------|---------------------------------|
| ZPVE =  | 0.145302    | (after scaling by 0.9854)       |
| G4 Ee = | -347.292646 | (total electronic energy)       |
| G4 U0 = | -347.147344 | (Zero-kelvin internal energy)   |
| G4 UT = | -347.138193 | (Internal energy at 298.15 K)   |
| G4 HT = | -347.137248 | (Enthalpy at 298.15 K)          |
| G4 GT = | -347.181759 | (Gibbs free energy at 298.15 K) |

Species 8: Transition state along  $\cdot\text{QOOH} \xrightarrow{\text{TS}_3} \text{alkene} + \cdot\text{OOH}$

[ G4 data ]

== B3LYP/6-31G(2df,p) equilibrium geometry (Angstrom) ==

|   |           |           |           |
|---|-----------|-----------|-----------|
| C | -1.049011 | 0.043601  | 0.025651  |
| C | -0.165364 | -0.227727 | 1.186515  |
| H | -0.052370 | -1.231720 | 1.571359  |
| H | 0.461435  | 0.551108  | 1.597018  |
| H | 3.001752  | 0.679735  | -0.779598 |
| C | -1.509689 | 1.496357  | -0.088671 |
| H | -0.668254 | 2.185775  | 0.031322  |
| H | -1.966629 | 1.683744  | -1.066613 |
| H | -2.249494 | 1.728664  | 0.684675  |
| C | -2.199168 | -0.949252 | -0.138701 |
| H | -2.681058 | -0.830474 | -1.115199 |
| H | -1.843969 | -1.981645 | -0.059463 |
| H | -2.955810 | -0.793124 | 0.637823  |
| C | 0.173274  | -0.280069 | -0.789057 |
| H | 0.174512  | -1.239297 | -1.294003 |
| H | 0.614926  | 0.545834  | -1.335153 |
| O | 2.653934  | 0.481247  | 0.102985  |
| O | 1.929154  | -0.705755 | -0.108809 |

== B3LYP/6-31G(2df,p) harmonic frequencies (cm<sup>-1</sup>) ==

|           |           |           |           |           |           |           |
|-----------|-----------|-----------|-----------|-----------|-----------|-----------|
| -706.3751 | 53.2946   | 67.3227   | 223.1554  | 225.6268  | 242.4401  | 286.2744  |
| 331.6585  | 347.5225  | 380.3616  | 398.9499  | 414.2176  | 452.1004  | 581.1468  |
| 684.6869  | 743.5738  | 851.7382  | 903.6147  | 923.0232  | 945.6122  | 959.9244  |
| 1028.6694 | 1035.2920 | 1074.7812 | 1098.1586 | 1193.1657 | 1298.8853 | 1310.5084 |
| 1379.7566 | 1400.5499 | 1411.8510 | 1426.3033 | 1471.6460 | 1484.1403 | 1486.8906 |
| 1501.5590 | 1507.2382 | 3025.1643 | 3029.8026 | 3095.3140 | 3099.5748 | 3101.5003 |
| 3105.4016 | 3124.9203 | 3179.9183 | 3235.8153 | 3293.2930 | 3701.1615 |           |

== Thermochemistry energies (hartree) ==

|         |             |                                 |
|---------|-------------|---------------------------------|
| ZPVE =  | 0.148428    | (after scaling by 0.9854)       |
| G4 Ee = | -347.294700 | (total electronic energy)       |
| G4 U0 = | -347.146272 | (Zero-kelvin internal energy)   |
| G4 UT = | -347.136934 | (Internal energy at 298.15 K)   |
| G4 HT = | -347.135990 | (Enthalpy at 298.15 K)          |
| G4 GT = | -347.180652 | (Gibbs free energy at 298.15 K) |

Species 9: Transition state along  $\cdot\text{QOOH} \xrightarrow{\text{TS4}} \text{cycloether} + \cdot\text{OH}$

[ G4 data ]

== B3LYP/6-31G(2df,p) equilibrium geometry (Angstrom) ==

|   |           |           |           |
|---|-----------|-----------|-----------|
| C | 0.905787  | -0.005947 | -0.008853 |
| C | 0.391071  | -0.276269 | 1.390187  |
| H | 0.309437  | -1.300194 | 1.739532  |
| H | 0.404407  | 0.496215  | 2.150188  |
| H | -3.226307 | -0.595091 | 0.187906  |
| C | 2.003511  | -0.981204 | -0.452335 |
| H | 1.685113  | -2.021438 | -0.329320 |
| H | 2.253873  | -0.828862 | -1.508184 |
| H | 2.917413  | -0.834726 | 0.133115  |
| C | 1.366448  | 1.451386  | -0.144679 |
| H | 1.659802  | 1.672227  | -1.176148 |
| H | 0.559454  | 2.135418  | 0.134657  |
| H | 2.227209  | 1.653121  | 0.502060  |
| C | -0.438902 | -0.224744 | -0.730181 |
| H | -0.663275 | 0.499304  | -1.519671 |
| H | -0.548413 | -1.240062 | -1.134908 |
| O | -2.811338 | 0.104768  | -0.334660 |
| O | -1.306938 | -0.031674 | 0.396651  |

== B3LYP/6-31G(2df,p) harmonic frequencies (cm<sup>-1</sup>) ==

|           |           |           |           |           |           |           |
|-----------|-----------|-----------|-----------|-----------|-----------|-----------|
| -797.1603 | 69.5151   | 155.1632  | 161.2733  | 212.0226  | 238.1732  | 280.8123  |
| 312.9241  | 325.1845  | 397.4341  | 409.7355  | 427.1864  | 541.7103  | 569.9247  |
| 782.0455  | 824.4674  | 908.3469  | 927.0065  | 953.0595  | 965.8197  | 1000.7186 |
| 1018.3693 | 1057.6717 | 1098.0342 | 1186.8083 | 1224.9432 | 1243.5286 | 1285.1634 |
| 1345.3556 | 1397.7914 | 1414.7608 | 1466.6020 | 1486.0585 | 1487.0909 | 1500.8982 |
| 1509.9006 | 1521.1248 | 3005.8321 | 3025.3408 | 3031.3651 | 3075.1656 | 3094.2501 |
| 3099.7287 | 3101.2192 | 3110.8377 | 3142.8649 | 3249.2998 | 3789.3543 |           |

== Thermochemistry energies (hartree) ==

ZPVE = 0.149133 (after scaling by 0.9854)  
G4 Ee = -347.344800 (total electronic energy)  
G4 U0 = -347.195667 (Zero-kelvin internal energy)  
G4 UT = -347.186551 (Internal energy at 298.15 K)  
G4 HT = -347.185607 (Enthalpy at 298.15 K)  
G4 GT = -347.229320 (Gibbs free energy at 298.15 K)

# Hydrocarbon 6:cyclohexyl

Species 1: ·R

[ G4 data ]

== B3LYP/6-31G(2df,p) equilibrium geometry (Angstrom) ==

|   |           |           |           |
|---|-----------|-----------|-----------|
| C | -1.289714 | 0.777406  | 0.154692  |
| C | -0.000000 | 1.463349  | -0.164195 |
| C | 1.289714  | 0.777406  | 0.154691  |
| C | 1.266342  | -0.712975 | -0.243361 |
| C | 0.000000  | -1.409192 | 0.273809  |
| C | -1.266342 | -0.712975 | -0.243360 |
| H | -2.163581 | -1.215348 | 0.135350  |
| H | -1.296382 | -0.791972 | -1.337963 |
| H | 0.000000  | -1.396410 | 1.373338  |
| H | 0.000000  | -2.463805 | -0.024652 |
| H | 2.163581  | -1.215348 | 0.135349  |
| H | 1.296381  | -0.791972 | -1.337964 |
| H | 1.485957  | 0.835247  | 1.243224  |
| H | 2.132813  | 1.289252  | -0.323031 |
| H | -0.000000 | 2.527742  | -0.377500 |
| H | -2.132813 | 1.289252  | -0.323030 |
| H | -1.485956 | 0.835247  | 1.243225  |

== B3LYP/6-31G(2df,p) harmonic frequencies (cm<sup>-1</sup>) ==

|           |           |           |           |           |           |           |
|-----------|-----------|-----------|-----------|-----------|-----------|-----------|
| 171.5231  | 206.4998  | 327.7852  | 388.1792  | 433.8644  | 455.9492  | 606.4854  |
| 779.0405  | 808.7995  | 851.5860  | 873.8909  | 876.2477  | 923.2190  | 1015.0144 |
| 1033.3325 | 1057.7189 | 1090.2710 | 1110.2676 | 1128.5356 | 1150.6358 | 1252.4261 |
| 1281.0151 | 1291.6657 | 1338.6534 | 1344.8544 | 1354.0171 | 1378.5517 | 1389.3111 |
| 1393.8900 | 1464.4832 | 1468.8779 | 1485.4495 | 1488.3374 | 1500.6566 | 2903.6520 |
| 2908.8652 | 3004.9342 | 3018.1370 | 3019.0742 | 3051.2830 | 3051.8901 | 3058.6398 |
| 3062.1411 | 3066.9810 | 3170.7073 |           |           |           |           |

== Thermochemistry energies (hartree) ==

|         |             |                                 |
|---------|-------------|---------------------------------|
| ZPVE =  | 0.152737    | (after scaling by 0.9854)       |
| G4 Ee = | -235.164307 | (total electronic energy)       |
| G4 U0 = | -235.011570 | (Zero-kelvin internal energy)   |
| G4 UT = | -235.005405 | (Internal energy at 298.15 K)   |
| G4 HT = | -235.004461 | (Enthalpy at 298.15 K)          |
| G4 GT = | -235.041393 | (Gibbs free energy at 298.15 K) |

## Species 2: ROO·

[ G4 data ]

== B3LYP/6-31G(2df,p) equilibrium geometry (Angstrom) ==

|   |           |           |           |
|---|-----------|-----------|-----------|
| C | -0.130395 | 1.153038  | -0.275173 |
| C | -0.648726 | -0.188011 | 0.236961  |
| C | 0.237173  | -1.354433 | -0.184449 |
| C | 1.683088  | -1.122138 | 0.284905  |
| C | 2.229623  | 0.224816  | -0.210738 |
| C | 1.311921  | 1.385733  | 0.200442  |
| H | 1.685777  | 2.332501  | -0.203040 |
| H | 1.322967  | 1.488545  | 1.294130  |
| H | 2.313541  | 0.200565  | -1.305775 |
| H | 3.241494  | 0.386025  | 0.176383  |
| H | 2.317838  | -1.944806 | -0.060218 |
| H | 1.715229  | -1.145012 | 1.382700  |
| H | 0.209078  | -1.438383 | -1.278383 |
| H | -0.160180 | -2.290844 | 0.219915  |
| H | -0.772750 | -0.159330 | 1.325095  |
| O | -1.981234 | -0.452330 | -0.311363 |
| O | -2.894504 | 0.312873  | 0.241911  |
| H | -0.798125 | 1.949383  | 0.065459  |
| H | -0.165065 | 1.143000  | -1.372339 |

== B3LYP/6-31G(2df,p) harmonic frequencies (cm<sup>-1</sup>) ==

|           |           |           |           |           |           |           |
|-----------|-----------|-----------|-----------|-----------|-----------|-----------|
| 80.7701   | 130.9883  | 223.3433  | 248.8593  | 321.3116  | 364.8351  | 438.5234  |
| 453.7305  | 505.0543  | 565.5788  | 796.4357  | 807.1287  | 848.6957  | 895.1154  |
| 902.9297  | 923.3738  | 936.5556  | 1021.0678 | 1046.5752 | 1062.7796 | 1085.3921 |
| 1103.5047 | 1171.7975 | 1200.0577 | 1217.8973 | 1269.0096 | 1281.3432 | 1285.2168 |
| 1327.1885 | 1331.5568 | 1365.5534 | 1376.3046 | 1378.0483 | 1382.2905 | 1392.3982 |
| 1484.2524 | 1486.6988 | 1489.7141 | 1494.9060 | 1509.3067 | 3013.7951 | 3016.5105 |
| 3021.6774 | 3028.7015 | 3031.2122 | 3054.0778 | 3068.9770 | 3071.1843 | 3074.9894 |
| 3084.2876 | 3095.7828 |           |           |           |           |           |

== Thermochemistry energies (hartree) ==

|         |             |                                 |
|---------|-------------|---------------------------------|
| ZPVE =  | 0.163356    | (after scaling by 0.9854)       |
| G4 Ee = | -385.512275 | (total electronic energy)       |
| G4 U0 = | -385.348919 | (Zero-kelvin internal energy)   |
| G4 UT = | -385.341113 | (Internal energy at 298.15 K)   |
| G4 HT = | -385.340169 | (Enthalpy at 298.15 K)          |
| G4 GT = | -385.381858 | (Gibbs free energy at 298.15 K) |

### Species 3: ·QOOH

[ G4 data ]

== B3LYP/6-31G(2df,p) equilibrium geometry (Angstrom) ==

|   |           |           |           |
|---|-----------|-----------|-----------|
| C | -0.630199 | -0.211836 | 0.248051  |
| C | 0.313718  | -1.354822 | -0.159007 |
| C | 1.749632  | -1.064434 | 0.301947  |
| C | 2.265993  | 0.262949  | -0.268201 |
| C | 1.342449  | 1.434527  | 0.125148  |
| C | -0.092586 | 1.122644  | -0.150119 |
| H | -0.799995 | 1.904923  | -0.397283 |
| H | 1.642853  | 2.353375  | -0.389769 |
| H | 1.488226  | 1.637649  | 1.203542  |
| H | 2.309372  | 0.191697  | -1.362313 |
| H | 3.286533  | 0.456830  | 0.079826  |
| H | 2.404131  | -1.889007 | -0.000691 |
| H | 1.782175  | -1.029085 | 1.400015  |
| H | 0.284659  | -1.446989 | -1.251248 |
| H | -0.052790 | -2.297954 | 0.258356  |
| O | -1.881289 | -0.520054 | -0.370825 |
| O | -2.858028 | 0.437834  | 0.095357  |
| H | -3.350193 | -0.103416 | 0.729377  |
| H | -0.774478 | -0.254438 | 1.347002  |

== B3LYP/6-31G(2df,p) harmonic frequencies (cm<sup>-1</sup>) ==

|           |           |           |           |           |           |           |
|-----------|-----------|-----------|-----------|-----------|-----------|-----------|
| 94.8538   | 117.1044  | 184.7921  | 215.5772  | 240.4024  | 313.8362  | 347.0143  |
| 371.8135  | 452.2197  | 490.7825  | 528.9217  | 602.6175  | 793.1464  | 838.2094  |
| 868.0820  | 904.0681  | 909.5558  | 946.8242  | 969.0318  | 1038.0551 | 1059.9902 |
| 1069.0537 | 1102.4693 | 1109.2457 | 1148.9798 | 1202.4084 | 1255.6556 | 1274.8375 |
| 1311.7425 | 1323.4937 | 1346.0670 | 1351.2462 | 1367.7587 | 1380.6333 | 1384.4985 |
| 1396.4366 | 1469.1458 | 1486.4575 | 1489.9257 | 1500.6822 | 2876.4886 | 2913.4322 |
| 3011.1879 | 3024.9376 | 3036.6561 | 3060.0471 | 3066.0736 | 3071.1654 | 3085.3667 |
| 3205.8644 | 3744.2720 |           |           |           |           |           |

== Thermochemistry energies (hartree) ==

|         |             |                                 |
|---------|-------------|---------------------------------|
| ZPVE =  | 0.160181    | (after scaling by 0.9854)       |
| G4 Ee = | -385.485087 | (total electronic energy)       |
| G4 U0 = | -385.324906 | (Zero-kelvin internal energy)   |
| G4 UT = | -385.316250 | (Internal energy at 298.15 K)   |
| G4 HT = | -385.315306 | (Enthalpy at 298.15 K)          |
| G4 GT = | -385.358502 | (Gibbs free energy at 298.15 K) |

## Species 4: *cy*-ether

[ G4 data ]

== B3LYP/6-31G(2df,p) equilibrium geometry (Angstrom) ==

|   |           |           |           |
|---|-----------|-----------|-----------|
| C | -0.987973 | 0.836146  | -0.293602 |
| C | 0.345659  | 1.517624  | -0.036399 |
| C | 1.551305  | 0.569982  | -0.171247 |
| C | 1.275483  | -0.808440 | 0.442380  |
| C | 0.125878  | -1.510810 | -0.295164 |
| C | -1.097820 | -0.629178 | -0.411192 |
| H | -1.922940 | -1.040301 | -0.995762 |
| O | -1.509372 | 0.041046  | 0.783254  |
| H | -0.147114 | -2.444870 | 0.210846  |
| H | 0.443762  | -1.786539 | -1.310268 |
| H | 1.012041  | -0.697397 | 1.500002  |
| H | 2.174509  | -1.431806 | 0.397814  |
| H | 2.432485  | 1.028225  | 0.290120  |
| H | 1.791086  | 0.439293  | -1.235226 |
| H | 0.309661  | 1.943617  | 0.973939  |
| H | 0.455301  | 2.362623  | -0.725348 |
| H | -1.749011 | 1.446837  | -0.780806 |

== B3LYP/6-31G(2df,p) harmonic frequencies (cm<sup>-1</sup>) ==

|           |           |           |           |           |           |           |
|-----------|-----------|-----------|-----------|-----------|-----------|-----------|
| 142.7122  | 270.4089  | 355.0371  | 371.2494  | 438.4170  | 540.7891  | 644.7581  |
| 774.3019  | 786.4238  | 826.4033  | 850.9347  | 894.3645  | 905.3565  | 986.5031  |
| 1002.9939 | 1043.9634 | 1053.2786 | 1078.5679 | 1099.4618 | 1169.5073 | 1191.4942 |
| 1211.3659 | 1274.7573 | 1290.6997 | 1302.6803 | 1352.7872 | 1369.7690 | 1377.2718 |
| 1389.2011 | 1398.2659 | 1462.4341 | 1477.6210 | 1485.2093 | 1488.6819 | 1499.2601 |
| 3013.9252 | 3015.5638 | 3028.6092 | 3039.4644 | 3055.3020 | 3064.0549 | 3073.2630 |
| 3085.5623 | 3087.0391 | 3103.0084 |           |           |           |           |

== Thermochemistry energies (hartree) ==

|         |             |                                 |
|---------|-------------|---------------------------------|
| ZPVE =  | 0.149001    | (after scaling by 0.9854)       |
| G4 Ee = | -309.790329 | (total electronic energy)       |
| G4 U0 = | -309.641328 | (Zero-kelvin internal energy)   |
| G4 UT = | -309.635246 | (Internal energy at 298.15 K)   |
| G4 HT = | -309.634302 | (Enthalpy at 298.15 K)          |
| G4 GT = | -309.670957 | (Gibbs free energy at 298.15 K) |

## Species 5: alkene

[ G4 data ]

== B3LYP/6-31G(2df,p) equilibrium geometry (Angstrom) ==

|   |           |           |           |
|---|-----------|-----------|-----------|
| C | 1.496567  | 0.048458  | 0.110627  |
| C | 0.663993  | 1.304326  | 0.056958  |
| C | -0.663991 | 1.304326  | -0.056958 |
| C | -1.496567 | 0.048459  | -0.110627 |
| C | -0.697584 | -1.191548 | 0.318571  |
| C | 0.697583  | -1.191548 | -0.318571 |
| H | 1.243594  | -2.103839 | -0.055345 |
| H | 0.592460  | -1.191190 | -1.411365 |
| H | -0.592461 | -1.191190 | 1.411365  |
| H | -1.243595 | -2.103838 | 0.055345  |
| H | -2.383763 | 0.165628  | 0.524806  |
| H | -1.887300 | -0.088226 | -1.130522 |
| H | -1.198408 | 2.250210  | -0.113053 |
| H | 1.198410  | 2.250209  | 0.113052  |
| H | 1.887299  | -0.088228 | 1.130522  |
| H | 2.383763  | 0.165626  | -0.524806 |

== B3LYP/6-31G(2df,p) harmonic frequencies (cm<sup>-1</sup>) ==

|           |           |           |           |           |           |           |
|-----------|-----------|-----------|-----------|-----------|-----------|-----------|
| 164.3551  | 274.4374  | 399.1237  | 452.8988  | 498.4860  | 656.5412  | 731.4133  |
| 822.3202  | 829.0124  | 884.1738  | 911.9663  | 934.6902  | 1006.9981 | 1015.7470 |
| 1048.8786 | 1074.3297 | 1095.6292 | 1154.0997 | 1159.2438 | 1248.1094 | 1267.5771 |
| 1291.6335 | 1350.8620 | 1368.3638 | 1372.9315 | 1385.6296 | 1420.4702 | 1472.2368 |
| 1478.7798 | 1489.6274 | 1499.6733 | 1725.4484 | 2992.5294 | 2992.5299 | 3016.5594 |
| 3020.7798 | 3037.6699 | 3037.9018 | 3067.0198 | 3071.1577 | 3135.2705 | 3159.6167 |

== Thermochemistry energies (hartree) ==

|         |             |                                 |
|---------|-------------|---------------------------------|
| ZPVE =  | 0.143712    | (after scaling by 0.9854)       |
| G4 Ee = | -234.600092 | (total electronic energy)       |
| G4 U0 = | -234.456380 | (Zero-kelvin internal energy)   |
| G4 UT = | -234.450783 | (Internal energy at 298.15 K)   |
| G4 HT = | -234.449838 | (Enthalpy at 298.15 K)          |
| G4 GT = | -234.485077 | (Gibbs free energy at 298.15 K) |



Species 6: Transition state along  $\text{ROO} \cdot \xrightarrow{\text{TS1}} \cdot\text{QOOH}$

[ G4 data ]

== B3LYP/6-31G(2df,p) equilibrium geometry (Angstrom) ==

|   |           |           |           |
|---|-----------|-----------|-----------|
| C | 0.302792  | 0.943953  | 0.315536  |
| C | 0.616850  | -0.435926 | -0.258544 |
| C | -0.419176 | -1.456271 | 0.193451  |
| C | -1.801222 | -0.943723 | -0.269860 |
| C | -2.109924 | 0.489802  | 0.205692  |
| C | -0.994909 | 1.507281  | -0.183213 |
| H | -1.218148 | 2.487511  | 0.248737  |
| H | -0.974985 | 1.621016  | -1.274564 |
| H | -2.219445 | 0.494688  | 1.297537  |
| H | -3.068213 | 0.821723  | -0.208538 |
| H | -2.583102 | -1.623704 | 0.083805  |
| H | -1.839340 | -0.974565 | -1.366814 |
| H | -0.387778 | -1.551912 | 1.285115  |
| H | -0.211630 | -2.443524 | -0.232851 |
| H | 0.626240  | -0.371486 | -1.357767 |
| O | 1.939680  | -0.675251 | 0.203231  |
| O | 2.597055  | 0.514888  | -0.187848 |
| H | 1.607798  | 1.231593  | -0.022890 |
| H | 0.408267  | 0.960873  | 1.406807  |

== B3LYP/6-31G(2df,p) harmonic frequencies (cm<sup>-1</sup>) ==

|            |           |           |           |           |           |           |
|------------|-----------|-----------|-----------|-----------|-----------|-----------|
| -2188.1095 | 155.6455  | 211.4014  | 286.6950  | 316.7592  | 335.7143  | 395.0762  |
| 466.9775   | 508.7440  | 579.1339  | 662.9425  | 798.1291  | 821.5830  | 836.8471  |
| 891.8465   | 915.2982  | 932.1422  | 952.8413  | 976.9792  | 1040.7711 | 1054.8256 |
| 1057.2710  | 1100.1932 | 1146.0059 | 1167.9037 | 1186.7957 | 1194.2714 | 1258.5894 |
| 1264.7888  | 1303.8040 | 1333.7004 | 1341.3383 | 1361.0695 | 1373.8065 | 1384.2603 |
| 1393.5761  | 1483.5692 | 1486.3160 | 1492.3706 | 1501.4088 | 1755.0133 | 2983.3853 |
| 3022.3701  | 3025.7877 | 3028.2142 | 3036.6024 | 3060.5468 | 3071.3737 | 3075.2827 |
| 3084.6733  | 3088.6835 |           |           |           |           |           |

== Thermochemistry energies (hartree) ==

|         |             |                                 |
|---------|-------------|---------------------------------|
| ZPVE =  | 0.157600    | (after scaling by 0.9854)       |
| G4 Ee = | -385.446584 | (total electronic energy)       |
| G4 U0 = | -385.288984 | (Zero-kelvin internal energy)   |
| G4 UT = | -385.281823 | (Internal energy at 298.15 K)   |
| G4 HT = | -385.280879 | (Enthalpy at 298.15 K)          |
| G4 GT = | -385.320735 | (Gibbs free energy at 298.15 K) |

Species 7: Transition state along  $\text{ROO} \cdot \xrightarrow{\text{TS}_2} \text{alkene} + \cdot\text{OOH}$

[ G4 data ]

== B3LYP/6-31G(2df,p) equilibrium geometry (Angstrom) ==

|   |           |           |           |
|---|-----------|-----------|-----------|
| C | -0.371981 | 0.373737  | 1.053040  |
| C | -0.161629 | -0.981626 | 0.794244  |
| C | 1.043101  | -1.448515 | -0.040520 |
| C | 2.039084  | -0.316635 | -0.339783 |
| C | 1.310314  | 0.977258  | -0.723910 |
| C | 0.456413  | 1.468771  | 0.450758  |
| H | -0.183006 | 2.308704  | 0.159870  |
| H | 1.114735  | 1.854885  | 1.246406  |
| H | 0.664518  | 0.795180  | -1.592039 |
| H | 2.024148  | 1.754135  | -1.015934 |
| H | 2.726142  | -0.626168 | -1.134249 |
| H | 2.653724  | -0.124579 | 0.550092  |
| H | 0.696347  | -1.881284 | -0.987740 |
| H | 1.552127  | -2.261160 | 0.488585  |
| H | -0.497181 | -1.673577 | 1.568313  |
| O | -2.196038 | -0.614082 | -0.711407 |
| O | -2.104545 | 0.594059  | -0.326196 |
| H | -1.029363 | 0.656650  | 1.869097  |
| H | -1.209340 | -1.080553 | -0.014554 |

== B3LYP/6-31G(2df,p) harmonic frequencies (cm<sup>-1</sup>) ==

|           |           |           |           |           |           |           |
|-----------|-----------|-----------|-----------|-----------|-----------|-----------|
| -989.1772 | 81.9114   | 121.3244  | 195.3015  | 217.7750  | 306.9328  | 395.6696  |
| 439.9946  | 466.0221  | 542.6705  | 650.5375  | 712.0307  | 797.3874  | 817.0991  |
| 828.7140  | 885.6003  | 908.3471  | 945.2262  | 973.4392  | 1024.8918 | 1051.0477 |
| 1074.5486 | 1104.6098 | 1145.2367 | 1177.0516 | 1233.1097 | 1272.5371 | 1279.5852 |
| 1301.2561 | 1345.1781 | 1350.7295 | 1369.2102 | 1373.6195 | 1384.2669 | 1402.5563 |
| 1457.3903 | 1486.9099 | 1491.9910 | 1502.9339 | 1562.0886 | 1594.5381 | 2979.5507 |
| 3014.0804 | 3019.7621 | 3031.5543 | 3061.7641 | 3066.0464 | 3072.4339 | 3078.7084 |
| 3105.1472 | 3179.7989 |           |           |           |           |           |

== Thermochemistry energies (hartree) ==

|         |             |                                 |
|---------|-------------|---------------------------------|
| ZPVE =  | 0.156874    | (after scaling by 0.9854)       |
| G4 Ee = | -385.453648 | (total electronic energy)       |
| G4 U0 = | -385.296774 | (Zero-kelvin internal energy)   |
| G4 UT = | -385.288896 | (Internal energy at 298.15 K)   |
| G4 HT = | -385.287952 | (Enthalpy at 298.15 K)          |
| G4 GT = | -385.329858 | (Gibbs free energy at 298.15 K) |

Species 8: Transition state along  $\cdot\text{QOOH} \xrightarrow{\text{TS}_3} \text{alkene} + \cdot\text{OOH}$

[ G4 data ]

== B3LYP/6-31G(2df,p) equilibrium geometry (Angstrom) ==

|   |           |           |           |
|---|-----------|-----------|-----------|
| C | -0.031170 | 0.960763  | 0.877397  |
| C | -0.433143 | -0.367343 | 0.823206  |
| C | 0.511085  | -1.444760 | 0.324830  |
| C | 1.881814  | -0.897391 | -0.108252 |
| C | 1.727137  | 0.436935  | -0.846571 |
| C | 1.130908  | 1.493072  | 0.095067  |
| H | 0.826779  | 2.387141  | -0.467200 |
| H | 1.904996  | 1.849482  | 0.795032  |
| H | 1.056510  | 0.299590  | -1.703457 |
| H | 2.689205  | 0.781645  | -1.239316 |
| H | 2.392746  | -1.634392 | -0.736301 |
| H | 2.516978  | -0.744815 | 0.774447  |
| H | 0.024008  | -1.958506 | -0.512219 |
| H | 0.634641  | -2.198421 | 1.111118  |
| H | -1.197133 | -0.687070 | 1.523731  |
| O | -1.637469 | -0.382223 | -0.642978 |
| O | -2.870541 | 0.147313  | -0.267943 |
| H | -2.862789 | 1.024351  | -0.679416 |
| H | -0.641643 | 1.672628  | 1.426885  |

== B3LYP/6-31G(2df,p) harmonic frequencies (cm<sup>-1</sup>) ==

|           |           |           |           |           |           |           |
|-----------|-----------|-----------|-----------|-----------|-----------|-----------|
| -495.6700 | 54.8591   | 91.1244   | 142.6827  | 196.6286  | 284.6752  | 333.3823  |
| 357.1983  | 411.8690  | 456.3250  | 496.3285  | 673.1680  | 720.0728  | 807.5451  |
| 822.2060  | 883.8948  | 891.3085  | 910.5274  | 966.5961  | 1008.5716 | 1052.3155 |
| 1058.9557 | 1068.9296 | 1081.3643 | 1150.0009 | 1155.7211 | 1223.3687 | 1260.4028 |
| 1291.6205 | 1348.5340 | 1365.5868 | 1369.2063 | 1384.4228 | 1393.4459 | 1415.0355 |
| 1456.6737 | 1473.5995 | 1490.5356 | 1499.7581 | 1508.1493 | 2968.9262 | 3011.6928 |
| 3017.8528 | 3032.2314 | 3035.7349 | 3062.0256 | 3074.8652 | 3079.9426 | 3154.8761 |
| 3178.7325 | 3711.4136 |           |           |           |           |           |

== Thermochemistry energies (hartree) ==

|         |             |                                 |
|---------|-------------|---------------------------------|
| ZPVE =  | 0.159130    | (after scaling by 0.9854)       |
| G4 Ee = | -385.456690 | (total electronic energy)       |
| G4 U0 = | -385.297560 | (Zero-kelvin internal energy)   |
| G4 UT = | -385.288989 | (Internal energy at 298.15 K)   |
| G4 HT = | -385.288045 | (Enthalpy at 298.15 K)          |
| G4 GT = | -385.331789 | (Gibbs free energy at 298.15 K) |

Species 9: Transition state along  $\cdot\text{QOOH} \xrightarrow{\text{TS4}} \text{cycloether} + \cdot\text{OH}$

[ G4 data ]

== B3LYP/6-31G(2df,p) equilibrium geometry (Angstrom) ==

|   |           |           |           |
|---|-----------|-----------|-----------|
| C | -0.296883 | -1.241493 | 0.724410  |
| C | 0.610917  | -0.074210 | 0.841249  |
| C | 0.022609  | 1.322145  | 0.604890  |
| C | -1.399493 | 1.309899  | 0.007847  |
| C | -1.629943 | 0.113428  | -0.923535 |
| C | -1.511761 | -1.200452 | -0.135710 |
| H | -1.537559 | -2.073233 | -0.801284 |
| H | -2.391869 | -1.315061 | 0.522237  |
| H | -0.886213 | 0.117632  | -1.726489 |
| H | -2.619060 | 0.172934  | -1.388837 |
| H | -1.584689 | 2.249634  | -0.522136 |
| H | -2.138704 | 1.265311  | 0.819396  |
| H | 0.722634  | 1.832027  | -0.063342 |
| H | 0.025276  | 1.879366  | 1.547885  |
| H | 1.261072  | -0.100385 | 1.723920  |
| O | 1.244811  | -0.639109 | -0.282351 |
| O | 2.648056  | 0.292271  | -0.652787 |
| H | 3.245392  | -0.462701 | -0.557638 |
| H | -0.011902 | -2.166724 | 1.212479  |

== B3LYP/6-31G(2df,p) harmonic frequencies (cm<sup>-1</sup>) ==

|           |           |           |           |           |           |           |
|-----------|-----------|-----------|-----------|-----------|-----------|-----------|
| -710.1189 | 69.9850   | 121.5125  | 138.6569  | 158.6698  | 266.3644  | 290.7358  |
| 378.4804  | 402.9815  | 453.9837  | 519.7238  | 654.4903  | 700.0027  | 801.0424  |
| 815.3820  | 853.1154  | 873.5177  | 890.4316  | 962.7115  | 995.7459  | 1008.1338 |
| 1049.8462 | 1057.9790 | 1081.5952 | 1133.4225 | 1169.7490 | 1198.5625 | 1256.8079 |
| 1287.5063 | 1302.8827 | 1352.2274 | 1358.8380 | 1362.5813 | 1386.9764 | 1403.0044 |
| 1414.2931 | 1453.0613 | 1479.9731 | 1488.9918 | 1500.5256 | 2951.3661 | 3012.0321 |
| 3023.2625 | 3027.3696 | 3048.1806 | 3050.5193 | 3069.9860 | 3094.0176 | 3100.0479 |
| 3195.9491 | 3785.5190 |           |           |           |           |           |

== Thermochemistry energies (hartree) ==

|         |             |                                 |
|---------|-------------|---------------------------------|
| ZPVE =  | 0.158160    | (after scaling by 0.9854)       |
| G4 Ee = | -385.460406 | (total electronic energy)       |
| G4 U0 = | -385.302246 | (Zero-kelvin internal energy)   |
| G4 UT = | -385.293592 | (Internal energy at 298.15 K)   |
| G4 HT = | -385.292648 | (Enthalpy at 298.15 K)          |
| G4 GT = | -385.336209 | (Gibbs free energy at 298.15 K) |

# Hydrocarbon 7: $\alpha$ -cyclohexenyl

## Species 1: ·R

[ G4 data ]

== B3LYP/6-31G(2df,p) equilibrium geometry (Angstrom) ==

|   |           |           |           |
|---|-----------|-----------|-----------|
| C | -1.273160 | -0.672737 | 0.196088  |
| C | -1.215134 | 0.816055  | 0.003182  |
| C | 0.000578  | 1.475157  | -0.092136 |
| C | 1.215775  | 0.815105  | 0.003172  |
| C | 1.272629  | -0.673728 | 0.196097  |
| C | -0.000530 | -1.358445 | -0.330381 |
| H | -0.000945 | -2.420453 | -0.063881 |
| H | -0.000503 | -1.302193 | -1.425598 |
| H | 1.399413  | -0.904521 | 1.267224  |
| H | 2.158587  | -1.090980 | -0.297734 |
| H | 2.145263  | 1.373631  | -0.036896 |
| H | 0.000998  | 2.553494  | -0.231821 |
| H | -2.144185 | 1.375309  | -0.036876 |
| H | -2.159438 | -1.089286 | -0.297763 |
| H | -1.400142 | -0.903443 | 1.267210  |

== B3LYP/6-31G(2df,p) harmonic frequencies (cm<sup>-1</sup>) ==

|           |           |           |           |           |           |           |
|-----------|-----------|-----------|-----------|-----------|-----------|-----------|
| 183.1543  | 252.2057  | 429.1736  | 501.4861  | 512.1960  | 608.5259  | 690.2600  |
| 725.1101  | 836.5046  | 858.6848  | 892.5188  | 956.2417  | 966.1075  | 1011.6685 |
| 1058.1975 | 1062.2706 | 1139.1646 | 1139.8501 | 1158.7638 | 1222.0980 | 1268.1305 |
| 1343.9785 | 1354.2579 | 1367.9151 | 1401.0833 | 1444.4631 | 1472.1294 | 1475.2390 |
| 1491.1251 | 1510.4595 | 2962.7618 | 2964.4056 | 3027.3107 | 3040.8421 | 3047.9702 |
| 3076.2769 | 3149.1289 | 3176.2056 | 3185.6391 |           |           |           |

== Thermochemistry energies (hartree) ==

|         |             |                                 |
|---------|-------------|---------------------------------|
| ZPVE =  | 0.130123    | (after scaling by 0.9854)       |
| G4 Ee = | -233.955349 | (total electronic energy)       |
| G4 U0 = | -233.825226 | (Zero-kelvin internal energy)   |
| G4 UT = | -233.819639 | (Internal energy at 298.15 K)   |
| G4 HT = | -233.818694 | (Enthalpy at 298.15 K)          |
| G4 GT = | -233.854462 | (Gibbs free energy at 298.15 K) |

## Species 2: ROO·

[ G4 data ]

== B3LYP/6-31G(2df,p) equilibrium geometry (Angstrom) ==

|   |           |           |           |
|---|-----------|-----------|-----------|
| C | -2.135753 | -0.317973 | -0.252972 |
| C | -1.636443 | 1.094855  | -0.116558 |
| C | -0.387762 | 1.413113  | 0.227156  |
| C | 0.646764  | 0.379947  | 0.555579  |
| C | 0.075062  | -1.023769 | 0.736691  |
| C | -0.985385 | -1.330997 | -0.325337 |
| H | -1.365325 | -2.349917 | -0.204260 |
| H | -0.519488 | -1.277928 | -1.316173 |
| H | -0.365934 | -1.082286 | 1.739876  |
| H | 0.902735  | -1.737969 | 0.706041  |
| H | -0.079076 | 2.452413  | 0.288855  |
| H | -2.354037 | 1.890280  | -0.305652 |
| H | -2.772704 | -0.395767 | -1.142343 |
| H | -2.795724 | -0.546863 | 0.597936  |
| O | 1.611812  | 0.382763  | -0.577345 |
| H | 1.245799  | 0.671182  | 1.423127  |
| O | 2.718795  | -0.247037 | -0.264500 |

== B3LYP/6-31G(2df,p) harmonic frequencies (cm<sup>-1</sup>) ==

|           |           |           |           |           |           |           |
|-----------|-----------|-----------|-----------|-----------|-----------|-----------|
| 77.5627   | 112.1541  | 214.5211  | 264.9722  | 341.6828  | 435.4363  | 454.9981  |
| 530.2659  | 565.0153  | 697.5004  | 737.7540  | 827.7007  | 836.4692  | 888.5017  |
| 905.3452  | 946.0548  | 1013.2325 | 1014.4950 | 1065.3168 | 1073.1519 | 1108.6502 |
| 1156.7182 | 1175.4341 | 1204.9659 | 1259.8687 | 1276.4635 | 1324.8282 | 1349.6045 |
| 1362.7533 | 1374.6094 | 1392.3402 | 1425.1099 | 1468.1559 | 1481.6496 | 1494.6014 |
| 1717.4831 | 2995.7392 | 3031.2909 | 3038.9523 | 3051.9343 | 3070.9059 | 3086.5341 |
| 3095.1382 | 3148.3292 | 3177.3420 |           |           |           |           |

== Thermochemistry energies (hartree) ==

|         |             |                                 |
|---------|-------------|---------------------------------|
| ZPVE =  | 0.139794    | (after scaling by 0.9854)       |
| G4 Ee = | -384.277970 | (total electronic energy)       |
| G4 U0 = | -384.138176 | (Zero-kelvin internal energy)   |
| G4 UT = | -384.130668 | (Internal energy at 298.15 K)   |
| G4 HT = | -384.129724 | (Enthalpy at 298.15 K)          |
| G4 GT = | -384.170916 | (Gibbs free energy at 298.15 K) |

### Species 3: ·QOOH

[ G4 data ]

== B3LYP/6-31G(2df,p) equilibrium geometry (Angstrom) ==

|   |           |           |           |
|---|-----------|-----------|-----------|
| C | -2.273428 | -0.273578 | -0.081416 |
| C | -1.685730 | 1.111594  | -0.086247 |
| C | -0.401163 | 1.374668  | 0.150694  |
| C | 0.609508  | 0.315808  | 0.493961  |
| C | 0.029942  | -1.056561 | 0.528790  |
| C | -1.192060 | -1.356259 | -0.273078 |
| H | -1.590702 | -2.346746 | -0.033529 |
| H | -0.927954 | -1.380643 | -1.345323 |
| H | 0.616615  | -1.856555 | 0.966621  |
| H | -0.025353 | 2.392842  | 0.121430  |
| H | -2.368991 | 1.934799  | -0.282542 |
| H | -3.033618 | -0.357982 | -0.866771 |
| H | -2.804721 | -0.439057 | 0.866923  |
| O | 1.640509  | 0.453200  | -0.532073 |
| H | 1.100712  | 0.557645  | 1.446103  |
| O | 2.823342  | -0.224124 | -0.053233 |
| H | 2.800781  | -1.030944 | -0.586691 |

== B3LYP/6-31G(2df,p) harmonic frequencies (cm<sup>-1</sup>) ==

|           |           |           |           |           |           |           |
|-----------|-----------|-----------|-----------|-----------|-----------|-----------|
| 62.3684   | 116.2947  | 173.0854  | 243.8703  | 248.4454  | 295.7343  | 375.1969  |
| 450.7767  | 499.4854  | 548.5989  | 582.4250  | 720.6364  | 755.0868  | 840.2029  |
| 885.0535  | 913.6300  | 935.2001  | 962.3924  | 984.3945  | 1005.5061 | 1029.8747 |
| 1065.8585 | 1125.9299 | 1170.2998 | 1180.4905 | 1268.2127 | 1308.0636 | 1317.2320 |
| 1346.4491 | 1370.9528 | 1378.7243 | 1396.9286 | 1421.5023 | 1464.2831 | 1477.8900 |
| 1721.7701 | 2940.9632 | 3006.8324 | 3010.7689 | 3052.6253 | 3071.7526 | 3148.6364 |
| 3180.9428 | 3187.7191 | 3752.6996 |           |           |           |           |

== Thermochemistry energies (hartree) ==

|         |             |                                 |
|---------|-------------|---------------------------------|
| ZPVE =  | 0.136930    | (after scaling by 0.9854)       |
| G4 Ee = | -384.251883 | (total electronic energy)       |
| G4 U0 = | -384.114953 | (Zero-kelvin internal energy)   |
| G4 UT = | -384.106572 | (Internal energy at 298.15 K)   |
| G4 HT = | -384.105628 | (Enthalpy at 298.15 K)          |
| G4 GT = | -384.148565 | (Gibbs free energy at 298.15 K) |

## Species 4: *cy*-ether

[ G4 data ]

== B3LYP/6-31G(2df,p) equilibrium geometry (Angstrom) ==

|   |           |           |           |
|---|-----------|-----------|-----------|
| C | -1.608883 | -0.557352 | 0.103327  |
| C | -1.373107 | 0.914532  | -0.129827 |
| C | -0.176861 | 1.489547  | -0.002002 |
| C | 1.015302  | 0.700960  | 0.401441  |
| C | 0.930954  | -0.765582 | 0.363500  |
| C | -0.353092 | -1.422207 | -0.130407 |
| H | -0.481656 | -2.399073 | 0.346441  |
| H | -0.231288 | -1.602736 | -1.203464 |
| H | -0.047681 | 2.554857  | -0.170143 |
| H | -2.237760 | 1.518282  | -0.394587 |
| H | -2.419709 | -0.910035 | -0.543484 |
| H | -1.977819 | -0.694798 | 1.130708  |
| O | 1.694226  | -0.057708 | -0.621093 |
| H | 1.694713  | 1.177008  | 1.108444  |
| H | 1.541504  | -1.341230 | 1.058640  |

== B3LYP/6-31G(2df,p) harmonic frequencies (cm<sup>-1</sup>) ==

|           |           |           |           |           |           |           |
|-----------|-----------|-----------|-----------|-----------|-----------|-----------|
| 112.3600  | 248.8496  | 393.9407  | 480.0332  | 502.2682  | 538.5923  | 718.7188  |
| 757.5524  | 793.3936  | 827.6060  | 871.7301  | 940.6470  | 968.2761  | 971.3757  |
| 1000.3862 | 1048.8250 | 1060.8853 | 1088.5392 | 1148.8997 | 1193.6130 | 1213.0527 |
| 1270.9291 | 1288.9269 | 1346.6484 | 1350.5963 | 1392.5185 | 1420.8799 | 1460.3077 |
| 1475.2179 | 1483.3434 | 1712.9928 | 2999.7058 | 3043.4451 | 3059.8529 | 3087.3913 |
| 3102.9364 | 3114.8272 | 3150.5975 | 3175.8273 |           |           |           |

== Thermochemistry energies (hartree) ==

|         |             |                                 |
|---------|-------------|---------------------------------|
| ZPVE =  | 0.125303    | (after scaling by 0.9854)       |
| G4 Ee = | -308.552650 | (total electronic energy)       |
| G4 U0 = | -308.427347 | (Zero-kelvin internal energy)   |
| G4 UT = | -308.421480 | (Internal energy at 298.15 K)   |
| G4 HT = | -308.420536 | (Enthalpy at 298.15 K)          |
| G4 GT = | -308.456924 | (Gibbs free energy at 298.15 K) |



## Species 5: alkene

[ G4 data ]

== B3LYP/6-31G(2df,p) equilibrium geometry (Angstrom) ==

|   |           |           |           |
|---|-----------|-----------|-----------|
| C | -1.193587 | 0.731170  | 0.239101  |
| C | 0.114871  | 1.422535  | -0.063981 |
| C | 1.257282  | 0.724889  | -0.104548 |
| C | 1.257282  | -0.724889 | 0.104548  |
| C | 0.114871  | -1.422535 | 0.063981  |
| C | -1.193587 | -0.731170 | -0.239101 |
| H | -2.033578 | -1.271891 | 0.208930  |
| H | -1.360159 | -0.763727 | -1.328383 |
| H | 0.115451  | -2.501737 | 0.184561  |
| H | 2.206889  | 1.223532  | -0.273961 |
| H | 0.115450  | 2.501737  | -0.184561 |
| H | -2.033578 | 1.271891  | -0.208930 |
| H | -1.360159 | 0.763727  | 1.328383  |
| H | 2.206889  | -1.223532 | 0.273961  |

== B3LYP/6-31G(2df,p) harmonic frequencies (cm<sup>-1</sup>) ==

|           |           |           |           |           |           |           |
|-----------|-----------|-----------|-----------|-----------|-----------|-----------|
| 185.8733  | 300.8950  | 477.0534  | 520.8010  | 570.0290  | 678.5848  | 760.0494  |
| 789.1189  | 855.3345  | 931.3977  | 964.9377  | 976.3344  | 995.8444  | 1007.4120 |
| 1044.2655 | 1071.2778 | 1167.2376 | 1186.0426 | 1204.0793 | 1267.1456 | 1351.7339 |
| 1358.6946 | 1399.8273 | 1437.0243 | 1467.2001 | 1479.0894 | 1648.4249 | 1708.6853 |
| 2967.9427 | 2979.5188 | 3065.1647 | 3065.3860 | 3156.2752 | 3163.3752 | 3178.6951 |
| 3188.1616 |           |           |           |           |           |           |

== Thermochemistry energies (hartree) ==

|         |             |                                 |
|---------|-------------|---------------------------------|
| ZPVE =  | 0.120257    | (after scaling by 0.9854)       |
| G4 Ee = | -233.369786 | (total electronic energy)       |
| G4 U0 = | -233.249529 | (Zero-kelvin internal energy)   |
| G4 UT = | -233.244268 | (Internal energy at 298.15 K)   |
| G4 HT = | -233.243324 | (Enthalpy at 298.15 K)          |
| G4 GT = | -233.277832 | (Gibbs free energy at 298.15 K) |

Species 6: Transition state along  $\text{ROO} \cdot \xrightarrow{\text{TS1}} \cdot\text{QOOH}$

[ G4 data ]

== B3LYP/6-31G(2df,p) equilibrium geometry (Angstrom) ==

|   |           |           |           |
|---|-----------|-----------|-----------|
| C | -2.029311 | -0.580924 | -0.160666 |
| C | -1.770116 | 0.901695  | -0.143499 |
| C | -0.588200 | 1.452318  | 0.138952  |
| C | 0.609450  | 0.630778  | 0.512550  |
| C | 0.294050  | -0.855574 | 0.723405  |
| C | -0.717259 | -1.397987 | -0.251469 |
| H | -0.916120 | -2.459151 | -0.079342 |
| H | -0.322804 | -1.288091 | -1.268345 |
| H | 0.191053  | -1.180661 | 1.759529  |
| H | 1.585228  | -1.085551 | 0.296613  |
| H | -0.464050 | 2.531359  | 0.132649  |
| H | -2.615960 | 1.546629  | -0.371216 |
| H | -2.680524 | -0.833356 | -1.006064 |
| H | -2.590494 | -0.863600 | 0.741781  |
| O | 1.551218  | 0.626476  | -0.585074 |
| H | 1.111027  | 1.033232  | 1.402897  |
| O | 2.437651  | -0.414307 | -0.230443 |

== B3LYP/6-31G(2df,p) harmonic frequencies (cm<sup>-1</sup>) ==

|            |           |           |           |           |           |           |
|------------|-----------|-----------|-----------|-----------|-----------|-----------|
| -2157.5303 | 113.7017  | 193.0375  | 244.8613  | 288.8035  | 425.6294  | 459.3068  |
| 520.2369   | 585.7889  | 679.2871  | 727.7219  | 743.4715  | 827.8693  | 855.1591  |
| 883.4983   | 930.0590  | 949.6254  | 976.7347  | 990.2109  | 1006.8699 | 1050.9112 |
| 1067.6589  | 1104.9266 | 1128.5456 | 1165.1860 | 1211.7255 | 1254.1253 | 1310.0181 |
| 1317.3226  | 1345.3556 | 1365.3451 | 1388.6983 | 1414.9337 | 1471.0430 | 1484.9410 |
| 1709.1981  | 1738.7232 | 3006.9139 | 3013.1076 | 3037.8701 | 3054.3622 | 3093.4991 |
| 3120.9345  | 3148.4616 | 3175.8453 |           |           |           |           |

== Thermochemistry energies (hartree) ==

|         |             |                                 |
|---------|-------------|---------------------------------|
| ZPVE =  | 0.133755    | (after scaling by 0.9854)       |
| G4 Ee = | -384.218254 | (total electronic energy)       |
| G4 U0 = | -384.084499 | (Zero-kelvin internal energy)   |
| G4 UT = | -384.077509 | (Internal energy at 298.15 K)   |
| G4 HT = | -384.076564 | (Enthalpy at 298.15 K)          |
| G4 GT = | -384.116261 | (Gibbs free energy at 298.15 K) |

Species 7: Transition state along  $\text{ROO}\cdot \xrightarrow{\text{TS}_2} \text{alkene} + \cdot\text{OOH}$

[ G4 data ]

== B3LYP/6-31G(2df,p) equilibrium geometry (Angstrom) ==

|   |           |           |           |
|---|-----------|-----------|-----------|
| C | -2.125813 | -0.426875 | -0.277394 |
| C | -1.683211 | 1.007767  | -0.412619 |
| C | -0.542428 | 1.444892  | 0.146170  |
| C | 0.274895  | 0.540291  | 0.929437  |
| C | 0.154639  | -0.843796 | 0.800024  |
| C | -0.924999 | -1.377063 | -0.156647 |
| H | -1.255457 | -2.368273 | 0.165612  |
| H | -0.487758 | -1.505892 | -1.155204 |
| H | 0.400156  | -1.449606 | 1.672664  |
| H | 1.299960  | -0.983329 | 0.127167  |
| H | -0.249718 | 2.487358  | 0.080057  |
| H | -2.337837 | 1.701766  | -0.932270 |
| H | -2.743180 | -0.716172 | -1.134549 |
| H | -2.781676 | -0.509970 | 0.603811  |
| O | 2.219907  | 0.647617  | -0.373254 |
| H | 0.893234  | 0.958748  | 1.715493  |
| O | 2.323065  | -0.608357 | -0.541321 |

== B3LYP/6-31G(2df,p) harmonic frequencies (cm<sup>-1</sup>) ==

|            |           |           |           |           |           |           |
|------------|-----------|-----------|-----------|-----------|-----------|-----------|
| -1086.0841 | 97.6810   | 126.2665  | 183.9552  | 206.6816  | 295.1743  | 401.8751  |
| 495.2524   | 525.7261  | 585.1267  | 646.2231  | 725.1551  | 759.8647  | 848.9078  |
| 851.9709   | 925.8987  | 962.1401  | 989.0995  | 993.7571  | 1006.3191 | 1057.4168 |
| 1072.4494  | 1168.8122 | 1183.4066 | 1215.3850 | 1252.7327 | 1287.8540 | 1345.5687 |
| 1348.6096  | 1364.3920 | 1394.4599 | 1429.6912 | 1467.8253 | 1487.2477 | 1543.5277 |
| 1579.8116  | 1663.9739 | 2985.3807 | 3021.0815 | 3065.6802 | 3084.7944 | 3117.5590 |
| 3165.6674  | 3188.2757 | 3201.8742 |           |           |           |           |

== Thermochemistry energies (hartree) ==

|         |             |                                 |
|---------|-------------|---------------------------------|
| ZPVE =  | 0.133169    | (after scaling by 0.9854)       |
| G4 Ee = | -384.222617 | (total electronic energy)       |
| G4 U0 = | -384.089448 | (Zero-kelvin internal energy)   |
| G4 UT = | -384.081770 | (Internal energy at 298.15 K)   |
| G4 HT = | -384.080826 | (Enthalpy at 298.15 K)          |
| G4 GT = | -384.122315 | (Gibbs free energy at 298.15 K) |

Species 8: Transition state along  $\cdot\text{QOOH} \xrightarrow{\text{TS}_3} \text{alkene} + \cdot\text{OOH}$

[ G4 data ]

== B3LYP/6-31G(2df,p) equilibrium geometry (Angstrom) ==

|   |           |           |           |
|---|-----------|-----------|-----------|
| C | -2.304975 | -0.186164 | -0.207918 |
| C | -1.650033 | 1.170480  | -0.162011 |
| C | -0.398735 | 1.347291  | 0.273827  |
| C | 0.421700  | 0.215002  | 0.731160  |
| C | -0.098096 | -1.070550 | 0.623498  |
| C | -1.270257 | -1.326000 | -0.276705 |
| H | -1.740590 | -2.287062 | -0.047047 |
| H | -0.901025 | -1.403050 | -1.312978 |
| H | 0.429267  | -1.908105 | 1.067993  |
| H | 3.134186  | -0.972580 | -0.411684 |
| H | 0.048867  | 2.334367  | 0.309164  |
| H | -2.247366 | 2.027108  | -0.462808 |
| H | -2.985553 | -0.249556 | -1.063874 |
| H | -2.938209 | -0.304362 | 0.685147  |
| O | 1.740383  | 0.243428  | -0.655075 |
| H | 1.173401  | 0.416388  | 1.485983  |
| O | 2.988291  | -0.062616 | -0.112550 |

== B3LYP/6-31G(2df,p) harmonic frequencies (cm<sup>-1</sup>) ==

|           |           |           |           |           |           |           |
|-----------|-----------|-----------|-----------|-----------|-----------|-----------|
| -489.7085 | 61.7480   | 92.2428   | 155.3747  | 206.4314  | 262.5798  | 327.1685  |
| 407.4387  | 484.6277  | 491.0781  | 566.2647  | 678.5967  | 738.5538  | 767.8904  |
| 852.7393  | 923.6038  | 956.6543  | 964.0701  | 995.2985  | 997.0836  | 1027.8873 |
| 1045.5591 | 1071.6622 | 1162.7303 | 1179.5664 | 1188.5256 | 1268.2578 | 1336.8422 |
| 1351.1400 | 1387.4520 | 1401.2181 | 1433.8907 | 1460.7432 | 1476.6804 | 1488.1833 |
| 1696.9456 | 2966.2767 | 2990.8861 | 3060.5313 | 3071.4172 | 3159.8160 | 3174.1093 |
| 3187.6202 | 3197.8091 | 3709.6010 |           |           |           |           |

== Thermochemistry energies (hartree) ==

|         |             |                                 |
|---------|-------------|---------------------------------|
| ZPVE =  | 0.135648    | (after scaling by 0.9854)       |
| G4 Ee = | -384.225841 | (total electronic energy)       |
| G4 U0 = | -384.090193 | (Zero-kelvin internal energy)   |
| G4 UT = | -384.081922 | (Internal energy at 298.15 K)   |
| G4 HT = | -384.080978 | (Enthalpy at 298.15 K)          |
| G4 GT = | -384.124061 | (Gibbs free energy at 298.15 K) |

Species 9: Transition state along  $\cdot\text{QOOH} \xrightarrow{\text{TS4}} \text{cycloether} + \cdot\text{OH}$

[ G4 data ]

== B3LYP/6-31G(2df,p) equilibrium geometry (Angstrom) ==

|   |           |           |           |
|---|-----------|-----------|-----------|
| C | -2.222152 | 0.155064  | -0.228172 |
| C | -1.327132 | 1.361334  | -0.092324 |
| C | -0.060795 | 1.298496  | 0.316241  |
| C | 0.585830  | 0.006464  | 0.717691  |
| C | -0.255484 | -1.197271 | 0.557460  |
| C | -1.422798 | -1.159453 | -0.369414 |
| H | -2.067158 | -2.030223 | -0.213305 |
| H | -1.046674 | -1.229683 | -1.399794 |
| H | 0.031474  | -2.104980 | 1.071803  |
| H | 3.418715  | -0.399723 | -0.299127 |
| H | 0.559076  | 2.186945  | 0.375156  |
| H | -1.764141 | 2.323542  | -0.348572 |
| H | -2.876620 | 0.275792  | -1.098647 |
| H | -2.894031 | 0.094028  | 0.639833  |
| O | 1.380133  | -0.606423 | -0.266098 |
| H | 1.110263  | 0.089335  | 1.678205  |
| O | 2.837903  | 0.357317  | -0.460707 |

== B3LYP/6-31G(2df,p) harmonic frequencies (cm<sup>-1</sup>) ==

|           |           |           |           |           |           |           |
|-----------|-----------|-----------|-----------|-----------|-----------|-----------|
| -721.7624 | 77.5931   | 123.7023  | 154.2163  | 173.7788  | 262.5231  | 284.7243  |
| 392.0086  | 485.9008  | 513.7788  | 543.4080  | 670.6914  | 738.1378  | 757.4259  |
| 838.7102  | 891.0157  | 934.8442  | 941.0039  | 978.9102  | 1000.7853 | 1017.5373 |
| 1021.9513 | 1063.9259 | 1136.5106 | 1175.7944 | 1180.6070 | 1264.5772 | 1278.9225 |
| 1320.7943 | 1348.9755 | 1393.6695 | 1410.4399 | 1420.7233 | 1457.3250 | 1481.4111 |
| 1719.4512 | 3005.7456 | 3012.4550 | 3019.7124 | 3058.7862 | 3075.9398 | 3152.0346 |
| 3191.1983 | 3219.7989 | 3783.1817 |           |           |           |           |

== Thermochemistry energies (hartree) ==

|         |             |                                 |
|---------|-------------|---------------------------------|
| ZPVE =  | 0.134637    | (after scaling by 0.9854)       |
| G4 Ee = | -384.225917 | (total electronic energy)       |
| G4 U0 = | -384.091280 | (Zero-kelvin internal energy)   |
| G4 UT = | -384.082937 | (Internal energy at 298.15 K)   |
| G4 HT = | -384.081993 | (Enthalpy at 298.15 K)          |
| G4 GT = | -384.124864 | (Gibbs free energy at 298.15 K) |

# Hydrocarbon 8: $\beta$ -cyclohexenyl

## Species 1: ·R

[ G4 data ]

== B3LYP/6-31G(2df,p) equilibrium geometry (Angstrom) ==

|   |           |           |           |
|---|-----------|-----------|-----------|
| C | 1.484399  | -0.339764 | -0.017358 |
| C | 0.397376  | -1.350276 | -0.188920 |
| C | -0.988040 | -1.026382 | 0.262331  |
| C | -1.422367 | 0.385008  | -0.186836 |
| C | -0.320752 | 1.396689  | -0.002155 |
| C | 0.968601  | 1.072861  | 0.086612  |
| H | -2.314273 | 0.695187  | 0.371166  |
| H | -1.725409 | 0.361980  | -1.243654 |
| H | -1.039909 | -1.056022 | 1.366622  |
| H | -1.701923 | -1.777849 | -0.091092 |
| H | 0.665800  | -2.373223 | -0.431459 |
| H | 2.204661  | -0.407227 | -0.848378 |
| H | 2.096247  | -0.565592 | 0.878271  |
| H | 1.714862  | 1.851657  | 0.224962  |
| H | -0.615358 | 2.442267  | 0.051518  |

== B3LYP/6-31G(2df,p) harmonic frequencies (cm<sup>-1</sup>) ==

|           |           |           |           |           |           |           |
|-----------|-----------|-----------|-----------|-----------|-----------|-----------|
| 135.8948  | 202.7595  | 383.0498  | 391.9995  | 493.7646  | 536.5584  | 670.5163  |
| 751.5001  | 830.6440  | 885.3598  | 907.8928  | 922.4173  | 980.8747  | 1001.8238 |
| 1027.6276 | 1048.8244 | 1115.5755 | 1163.3498 | 1174.6693 | 1191.7075 | 1269.1596 |
| 1321.2125 | 1344.4407 | 1361.9066 | 1394.3696 | 1422.7514 | 1450.9133 | 1468.0807 |
| 1482.1043 | 1726.3158 | 2903.0973 | 2921.9393 | 2981.4592 | 3002.6153 | 3043.5694 |
| 3060.8381 | 3139.3092 | 3163.4042 | 3176.9746 |           |           |           |

== Thermochemistry energies (hartree) ==

|         |             |                                 |
|---------|-------------|---------------------------------|
| ZPVE =  | 0.128973    | (after scaling by 0.9854)       |
| G4 Ee = | -233.931708 | (total electronic energy)       |
| G4 U0 = | -233.802735 | (Zero-kelvin internal energy)   |
| G4 UT = | -233.796797 | (Internal energy at 298.15 K)   |
| G4 HT = | -233.795853 | (Enthalpy at 298.15 K)          |
| G4 GT = | -233.832429 | (Gibbs free energy at 298.15 K) |

[ CCSDT-F12a/cc-pVDZ-F12 data ]

CCSD(T)-F12a/cc-pVDZ-F12 Ee = -233.616222730409 (total electronic energy)

## Species 2: ROO·

[ G4 data ]

== B3LYP/6-31G(2df,p) equilibrium geometry (Angstrom) ==

|   |           |           |           |
|---|-----------|-----------|-----------|
| C | 0.152726  | 1.211045  | 0.715029  |
| C | 0.644944  | -0.234998 | 0.709209  |
| C | -0.492805 | -1.248930 | 0.748155  |
| C | -1.485174 | -1.038293 | -0.406861 |
| C | -1.818702 | 0.416208  | -0.609908 |
| C | -1.093775 | 1.413237  | -0.105601 |
| H | -2.400240 | -1.609846 | -0.211679 |
| H | -1.070289 | -1.451431 | -1.336145 |
| H | -1.007838 | -1.120589 | 1.707121  |
| H | -0.087544 | -2.265253 | 0.732580  |
| H | 1.368541  | -0.400691 | 1.511849  |
| H | 0.969560  | 1.845735  | 0.353119  |
| H | -0.021792 | 1.518306  | 1.755890  |
| H | -1.390616 | 2.443533  | -0.284603 |
| H | -2.694664 | 0.639727  | -1.213719 |
| O | 1.374918  | -0.514533 | -0.540481 |
| O | 2.486532  | 0.175895  | -0.623837 |

== B3LYP/6-31G(2df,p) harmonic frequencies (cm<sup>-1</sup>) ==

|           |           |           |           |           |           |           |
|-----------|-----------|-----------|-----------|-----------|-----------|-----------|
| 84.7786   | 132.0081  | 161.0668  | 306.0157  | 339.5836  | 395.6313  | 466.1165  |
| 546.5699  | 585.5990  | 673.2585  | 758.6653  | 821.5192  | 842.9222  | 891.5528  |
| 915.5459  | 955.4948  | 1001.9785 | 1006.0232 | 1047.2705 | 1061.8787 | 1103.2898 |
| 1160.6413 | 1198.4280 | 1219.7795 | 1235.1522 | 1270.7450 | 1335.1701 | 1343.8782 |
| 1358.8122 | 1373.0351 | 1394.1174 | 1422.9513 | 1464.8397 | 1474.7401 | 1484.3854 |
| 1729.3692 | 3012.3544 | 3019.6702 | 3039.8369 | 3054.7225 | 3064.6223 | 3077.4407 |
| 3089.5221 | 3146.4591 | 3169.4338 |           |           |           |           |

== Thermochemistry energies (hartree) ==

ZPVE = 0.139716 (after scaling by 0.9854)  
G4 Ee = -384.278103 (total electronic energy)  
G4 U0 = -384.138387 (Zero-kelvin internal energy)  
G4 UT = -384.130885 (Internal energy at 298.15 K)  
G4 HT = -384.129941 (Enthalpy at 298.15 K)  
G4 GT = -384.171027 (Gibbs free energy at 298.15 K)

[ CCSDT-F12a/cc-pVDZ-F12 data ]

CCSD(T)-F12a/cc-pVDZ-F12 Ee = -383.856809 (total electronic energy)

### Species 3: ·QOOH

[ G4 data ]

== B3LYP/6-31G(2df,p) equilibrium geometry (Angstrom) ==

|   |           |           |           |
|---|-----------|-----------|-----------|
| C | 0.087325  | 1.164726  | 0.607062  |
| C | 0.597779  | -0.247674 | 0.685166  |
| C | -0.548680 | -1.264546 | 0.660054  |
| C | -1.554496 | -0.978655 | -0.468234 |
| C | -1.965074 | 0.463515  | -0.492275 |
| C | -1.144567 | 1.446872  | 0.034997  |
| H | -2.431987 | -1.627038 | -0.363813 |
| H | -1.099881 | -1.244098 | -1.435068 |
| H | -1.058869 | -1.207274 | 1.627860  |
| H | -0.133861 | -2.272143 | 0.564766  |
| H | 1.209597  | -0.384276 | 1.585449  |
| H | 2.328671  | 0.930880  | -1.063053 |
| H | 0.711237  | 1.961625  | 0.995316  |
| H | -1.477010 | 2.481478  | -0.004873 |
| H | -2.905736 | 0.732989  | -0.961474 |
| O | 1.415329  | -0.599639 | -0.452219 |
| O | 2.587685  | 0.239942  | -0.435997 |

== B3LYP/6-31G(2df,p) harmonic frequencies (cm<sup>-1</sup>) ==

|           |           |           |           |           |           |           |
|-----------|-----------|-----------|-----------|-----------|-----------|-----------|
| 80.2347   | 141.5330  | 172.9412  | 267.6953  | 295.2575  | 343.4182  | 428.4045  |
| 482.1086  | 545.2478  | 593.3740  | 653.1714  | 709.9026  | 760.1530  | 838.8470  |
| 878.4016  | 911.5101  | 955.7332  | 967.5177  | 976.0116  | 1010.2551 | 1051.7958 |
| 1086.6700 | 1136.7319 | 1161.7653 | 1202.0647 | 1234.7452 | 1323.7399 | 1347.0848 |
| 1358.6336 | 1378.2698 | 1387.0232 | 1400.7005 | 1451.5705 | 1467.9828 | 1477.1839 |
| 1506.2828 | 2991.2897 | 3025.0095 | 3044.4406 | 3057.0149 | 3095.5601 | 3150.5274 |
| 3181.5297 | 3194.7954 | 3739.8022 |           |           |           |           |

== Thermochemistry energies (hartree) ==

ZPVE = 0.137981 (after scaling by 0.9854)  
G4 Ee = -384.276625 (total electronic energy)  
G4 U0 = -384.138644 (Zero-kelvin internal energy)  
G4 UT = -384.130675 (Internal energy at 298.15 K)  
G4 HT = -384.129731 (Enthalpy at 298.15 K)  
G4 GT = -384.171576 (Gibbs free energy at 298.15 K)

[ CCSDT-F12a/cc-pVDZ-F12 data ]

CCSD(T)-F12a/cc-pVDZ-F12 Ee = -383.855746 (total electronic energy)



## Species 4: *cy*-ether

[ G4 data ]

== B3LYP/6-31G(2df,p) equilibrium geometry (Angstrom) ==

|   |           |           |           |
|---|-----------|-----------|-----------|
| C | -1.037122 | 0.781370  | -0.263494 |
| C | -1.040984 | -0.691292 | -0.334161 |
| C | 0.287197  | -1.411554 | -0.401625 |
| C | 1.407693  | -0.647884 | 0.335344  |
| C | 1.398344  | 0.827163  | 0.027585  |
| C | 0.268854  | 1.485358  | -0.241080 |
| H | 2.379124  | -1.085690 | 0.083108  |
| H | 1.279328  | -0.786643 | 1.415995  |
| H | 0.546001  | -1.525627 | -1.462741 |
| H | 0.192039  | -2.422363 | 0.010113  |
| H | -1.881217 | -1.187060 | -0.822810 |
| H | -1.889669 | 1.329667  | -0.658919 |
| H | 0.273604  | 2.549958  | -0.453534 |
| H | 2.345861  | 1.358236  | 0.053616  |
| O | -1.368620 | -0.036180 | 0.887470  |

== B3LYP/6-31G(2df,p) harmonic frequencies (cm<sup>-1</sup>) ==

|           |           |           |           |           |           |           |
|-----------|-----------|-----------|-----------|-----------|-----------|-----------|
| 184.2735  | 272.9549  | 352.5473  | 469.9996  | 511.0246  | 638.3203  | 701.6634  |
| 723.2301  | 807.1387  | 825.2455  | 870.5349  | 941.5471  | 943.3760  | 984.9963  |
| 992.5077  | 1043.3894 | 1057.6566 | 1084.6237 | 1139.1559 | 1189.6818 | 1212.6117 |
| 1266.9436 | 1279.9545 | 1342.4273 | 1356.7165 | 1389.1101 | 1422.1095 | 1455.6735 |
| 1475.5635 | 1485.2511 | 1706.7477 | 3023.2285 | 3030.7340 | 3065.7167 | 3073.6136 |
| 3096.4340 | 3130.9455 | 3158.6298 | 3183.3470 |           |           |           |

== Thermochemistry energies (hartree) ==

|         |             |                                 |
|---------|-------------|---------------------------------|
| ZPVE =  | 0.125467    | (after scaling by 0.9854)       |
| G4 Ee = | -308.558055 | (total electronic energy)       |
| G4 U0 = | -308.432588 | (Zero-kelvin internal energy)   |
| G4 UT = | -308.426868 | (Internal energy at 298.15 K)   |
| G4 HT = | -308.425924 | (Enthalpy at 298.15 K)          |
| G4 GT = | -308.461770 | (Gibbs free energy at 298.15 K) |

## Species 5: alkene

[ G4 data ]

== B3LYP/6-31G(2df,p) equilibrium geometry (Angstrom) ==

|   |           |           |           |
|---|-----------|-----------|-----------|
| C | -0.047524 | 0.730845  | 1.257280  |
| C | 0.047524  | 1.423185  | 0.114882  |
| C | 0.295564  | 0.710221  | -1.193586 |
| C | -0.295564 | -0.710221 | -1.193586 |
| C | -0.047524 | -1.423185 | 0.114882  |
| C | 0.047524  | -0.730845 | 1.257280  |
| H | 0.108843  | -1.284331 | -2.033557 |
| H | -1.384043 | -0.657496 | -1.360242 |
| H | 1.384043  | 0.657496  | -1.360242 |
| H | -0.108843 | 1.284331  | -2.033557 |
| H | 0.011746  | 2.508512  | 0.115458  |
| H | -0.177426 | 1.241201  | 2.206890  |
| H | 0.177426  | -1.241201 | 2.206890  |
| H | -0.011746 | -2.508512 | 0.115458  |

== B3LYP/6-31G(2df,p) harmonic frequencies (cm<sup>-1</sup>) ==

|           |           |           |           |           |           |           |
|-----------|-----------|-----------|-----------|-----------|-----------|-----------|
| 186.0290  | 301.2623  | 477.1317  | 520.7165  | 570.0125  | 678.6001  | 760.0196  |
| 789.1127  | 855.3562  | 931.7446  | 965.0870  | 976.3074  | 995.7907  | 1007.4493 |
| 1044.4666 | 1071.5700 | 1167.2195 | 1186.0940 | 1204.0624 | 1267.2125 | 1351.7886 |
| 1358.8273 | 1399.9285 | 1437.0354 | 1467.3006 | 1479.1517 | 1648.4474 | 1708.7140 |
| 2967.9538 | 2979.5330 | 3065.0911 | 3065.3062 | 3156.2296 | 3163.3576 | 3178.6748 |
| 3188.1131 |           |           |           |           |           |           |

== Thermochemistry energies (hartree) ==

|         |             |                                 |
|---------|-------------|---------------------------------|
| ZPVE =  | 0.120261    | (after scaling by 0.9854)       |
| G4 Ee = | -233.369786 | (total electronic energy)       |
| G4 U0 = | -233.249525 | (Zero-kelvin internal energy)   |
| G4 UT = | -233.244265 | (Internal energy at 298.15 K)   |
| G4 HT = | -233.243320 | (Enthalpy at 298.15 K)          |
| G4 GT = | -233.277172 | (Gibbs free energy at 298.15 K) |

Species 6: Transition state along  $\text{ROO} \cdot \xrightarrow{\text{TS1}} \cdot\text{QOOH}$

[ G4 data ]

== B3LYP/6-31G(2df,p) equilibrium geometry (Angstrom) ==

|   |           |           |           |
|---|-----------|-----------|-----------|
| C | 0.376310  | 1.048705  | 0.686059  |
| C | 0.619052  | -0.474741 | 0.695945  |
| C | -0.653686 | -1.308780 | 0.622955  |
| C | -1.585412 | -0.826630 | -0.501670 |
| C | -1.756032 | 0.666216  | -0.482693 |
| C | -0.869167 | 1.500257  | 0.109490  |
| H | -2.563118 | -1.313817 | -0.412028 |
| H | -1.183764 | -1.136866 | -1.475292 |
| H | -1.166409 | -1.225658 | 1.588086  |
| H | -0.392731 | -2.362861 | 0.484989  |
| H | 1.233240  | -0.737328 | 1.566571  |
| H | 1.417161  | 1.156839  | -0.129004 |
| H | 0.731951  | 1.608867  | 1.552532  |
| H | -1.084932 | 2.565342  | 0.145307  |
| H | -2.650455 | 1.076994  | -0.942950 |
| O | 1.363092  | -0.740051 | -0.510550 |
| O | 2.245991  | 0.332341  | -0.634291 |

== B3LYP/6-31G(2df,p) harmonic frequencies (cm<sup>-1</sup>) ==

|            |           |           |           |           |           |           |
|------------|-----------|-----------|-----------|-----------|-----------|-----------|
| -2223.9678 | 114.1516  | 166.9165  | 250.4323  | 337.9654  | 406.7149  | 479.6986  |
| 545.7329   | 605.2991  | 666.0178  | 707.4598  | 777.8104  | 815.4433  | 861.8204  |
| 876.9721   | 941.8802  | 949.0178  | 962.3108  | 999.5188  | 1013.2690 | 1056.7024 |
| 1081.6784  | 1107.8901 | 1179.7953 | 1200.9488 | 1217.8017 | 1254.1000 | 1304.2326 |
| 1331.1683  | 1357.7221 | 1376.0048 | 1391.5496 | 1444.0362 | 1466.3002 | 1477.6857 |
| 1603.8653  | 1708.6512 | 3021.7561 | 3023.6021 | 3043.0939 | 3059.5722 | 3088.1978 |
| 3107.3166  | 3151.4481 | 3173.7032 |           |           |           |           |

== Thermochemistry energies (hartree) ==

ZPVE = 0.134037 (after scaling by 0.9854)  
G4 Ee = -384.227010 (total electronic energy)  
G4 U0 = -384.092973 (Zero-kelvin internal energy)  
G4 UT = -384.086042 (Internal energy at 298.15 K)  
G4 HT = -384.085098 (Enthalpy at 298.15 K)  
G4 GT = -384.124705 (Gibbs free energy at 298.15 K)

[ CCSDT-F12a/cc-pVDZ-F12 data ]

CCSD(T)-F12a/cc-pVDZ-F12 Ee = -383.807209 (total electronic energy)

Species 7: Transition state along  $\text{ROO} \cdot \xrightarrow{\text{TS}_2} \text{alkene} + \cdot\text{OOH}$

[ G4 data ]

== B3LYP/6-31G(2df,p) equilibrium geometry (Angstrom) ==

|   |           |           |           |
|---|-----------|-----------|-----------|
| C | 0.134716  | 1.018022  | 0.836328  |
| C | 0.355361  | -0.339787 | 1.090460  |
| C | -0.598551 | -1.378106 | 0.579168  |
| C | -1.333436 | -0.938721 | -0.699752 |
| C | -1.794186 | 0.497457  | -0.608679 |
| C | -1.106838 | 1.392011  | 0.104837  |
| H | -2.179515 | -1.608328 | -0.884749 |
| H | -0.660222 | -1.054673 | -1.561082 |
| H | -1.333692 | -1.544294 | 1.384871  |
| H | -0.089286 | -2.334186 | 0.427556  |
| H | 1.040993  | -0.637025 | 1.876581  |
| H | 1.125965  | 1.092919  | -0.095180 |
| H | 0.521347  | 1.734874  | 1.559974  |
| H | -1.419831 | 2.430617  | 0.149167  |
| H | -2.679697 | 0.792290  | -1.162968 |
| O | 1.938830  | -0.618796 | -0.373597 |
| O | 2.027612  | 0.571614  | -0.814945 |

== B3LYP/6-31G(2df,p) harmonic frequencies (cm<sup>-1</sup>) ==

|            |           |           |           |           |           |           |
|------------|-----------|-----------|-----------|-----------|-----------|-----------|
| -1074.8556 | 107.5879  | 132.7030  | 202.7679  | 233.2763  | 378.9131  | 421.1442  |
| 488.3301   | 542.5577  | 599.9634  | 632.4915  | 722.4215  | 763.4658  | 834.2065  |
| 871.4635   | 937.0488  | 949.3748  | 958.3882  | 991.7348  | 1020.9491 | 1046.7081 |
| 1067.2259  | 1155.5456 | 1180.7518 | 1204.3982 | 1251.7335 | 1265.4012 | 1341.9732 |
| 1348.6922  | 1355.4842 | 1396.4578 | 1420.8283 | 1456.8639 | 1483.8953 | 1519.0882 |
| 1605.1333  | 1703.8313 | 2972.1232 | 3008.6438 | 3068.1881 | 3080.2169 | 3124.2232 |
| 3164.2465  | 3185.9172 | 3189.3299 |           |           |           |           |

== Thermochemistry energies (hartree) ==

|         |             |                                 |
|---------|-------------|---------------------------------|
| ZPVE =  | 0.133315    | (after scaling by 0.9854)       |
| G4 Ee = | -384.227801 | (total electronic energy)       |
| G4 U0 = | -384.094486 | (Zero-kelvin internal energy)   |
| G4 UT = | -384.087022 | (Internal energy at 298.15 K)   |
| G4 HT = | -384.086078 | (Enthalpy at 298.15 K)          |
| G4 GT = | -384.126929 | (Gibbs free energy at 298.15 K) |

Species 8: Transition state along  $\cdot\text{QOOH} \xrightarrow{\text{TS}_3} \text{alkene} + \cdot\text{OOH}$

[ G4 data ]

== B3LYP/6-31G(2df,p) equilibrium geometry (Angstrom) ==

|   |           |           |           |
|---|-----------|-----------|-----------|
| C | -0.151275 | 1.214466  | 0.639751  |
| C | 0.312582  | -0.036335 | 0.980894  |
| C | -0.576145 | -1.232640 | 0.755849  |
| C | -1.442891 | -1.080324 | -0.507291 |
| C | -2.007045 | 0.309028  | -0.646303 |
| C | -1.364350 | 1.373743  | -0.117978 |
| H | -2.243877 | -1.827032 | -0.506910 |
| H | -0.828994 | -1.292232 | -1.395291 |
| H | -1.224675 | -1.338139 | 1.639380  |
| H | 0.026908  | -2.141970 | 0.696551  |
| H | 1.110044  | -0.129221 | 1.707642  |
| H | 2.723435  | 0.904290  | -1.072854 |
| H | 0.404699  | 2.097819  | 0.937207  |
| H | -1.750250 | 2.377010  | -0.272967 |
| H | -2.906348 | 0.446270  | -1.239225 |
| O | 1.680268  | -0.523241 | -0.503050 |
| O | 2.827707  | 0.225188  | -0.387333 |

== B3LYP/6-31G(2df,p) harmonic frequencies (cm<sup>-1</sup>) ==

|           |           |           |           |           |           |           |
|-----------|-----------|-----------|-----------|-----------|-----------|-----------|
| -379.9481 | 30.4483   | 104.6119  | 119.4758  | 197.0658  | 276.7852  | 307.5545  |
| 413.8166  | 484.0201  | 512.7977  | 574.7142  | 687.5744  | 758.0977  | 817.3025  |
| 855.7204  | 924.6059  | 942.8683  | 977.6288  | 984.7231  | 996.2287  | 1008.9077 |
| 1041.6975 | 1076.8221 | 1166.4118 | 1179.4231 | 1193.7162 | 1265.3625 | 1347.7210 |
| 1356.9303 | 1404.9280 | 1405.5332 | 1445.9061 | 1463.1146 | 1472.8391 | 1479.9961 |
| 1627.4317 | 2988.6681 | 3003.5282 | 3064.2084 | 3093.7637 | 3159.4327 | 3174.2188 |
| 3185.3988 | 3204.9776 | 3680.6197 | -379.9481 | 30.4476   | 104.6119  | 119.4759  |
| 197.0660  | 276.7853  | 307.5545  | 413.8166  | 484.0201  | 512.7977  | 574.7142  |
| 687.5744  | 758.0977  | 817.3026  | 855.7204  | 924.6059  | 942.8683  | 977.6288  |
| 984.7231  | 996.2287  | 1008.9076 | 1041.6974 | 1076.8220 | 1166.4118 | 1179.4230 |
| 1193.7161 | 1265.3624 | 1347.7209 | 1356.9302 | 1404.9280 | 1405.5331 | 1445.9060 |
| 1463.1144 | 1472.8389 | 1479.9960 | 1627.4318 | 2988.6681 | 3003.5282 | 3064.2084 |
| 3093.7637 | 3159.4327 | 3174.2188 | 3185.3987 | 3204.9776 | 3680.6197 |           |

== Thermochemistry energies (hartree) ==

|         |             |                                 |
|---------|-------------|---------------------------------|
| ZPVE =  | 0.135722    | (after scaling by 0.9854)       |
| G4 Ee = | -384.231876 | (total electronic energy)       |
| G4 U0 = | -384.096154 | (Zero-kelvin internal energy)   |
| G4 UT = | -384.087809 | (Internal energy at 298.15 K)   |
| G4 HT = | -384.086865 | (Enthalpy at 298.15 K)          |
| G4 GT = | -384.130717 | (Gibbs free energy at 298.15 K) |

Species 9: Transition state along  $\cdot\text{QOOH} \xrightarrow{\text{TS4}} \text{cycloether} + \cdot\text{OH}$

[ G4 data ]

== B3LYP/6-31G(2df,p) equilibrium geometry (Angstrom) ==

|   |           |           |           |
|---|-----------|-----------|-----------|
| C | 0.453615  | -1.367349 | 0.409385  |
| C | -0.527091 | -0.328385 | 0.812296  |
| C | 0.031343  | 1.085269  | 0.907151  |
| C | 0.973221  | 1.401925  | -0.266943 |
| C | 1.937121  | 0.290840  | -0.551276 |
| C | 1.656225  | -1.005691 | -0.249930 |
| H | 1.510938  | 2.339579  | -0.090222 |
| H | 0.367375  | 1.562331  | -1.170092 |
| H | 0.569911  | 1.175620  | 1.858973  |
| H | -0.802077 | 1.791756  | 0.927843  |
| H | -1.149890 | -0.585737 | 1.678000  |
| H | -3.143933 | -0.444094 | -0.828721 |
| H | 0.218216  | -2.403966 | 0.610852  |
| H | 2.351056  | -1.792363 | -0.528237 |
| H | 2.862276  | 0.532483  | -1.067018 |
| O | -1.099482 | -0.668860 | -0.406610 |
| O | -2.641827 | 0.339452  | -0.562825 |

== B3LYP/6-31G(2df,p) harmonic frequencies (cm<sup>-1</sup>) ==

|           |           |           |           |           |           |           |
|-----------|-----------|-----------|-----------|-----------|-----------|-----------|
| -643.7137 | 68.5795   | 126.8522  | 142.1841  | 208.7457  | 236.3302  | 314.6104  |
| 374.5625  | 477.2465  | 528.6246  | 599.2069  | 682.1976  | 748.9355  | 813.8973  |
| 836.0285  | 866.3055  | 908.4730  | 926.5510  | 977.0548  | 985.4077  | 999.0855  |
| 1061.9316 | 1096.1606 | 1144.6528 | 1183.0960 | 1196.6620 | 1259.7733 | 1286.7329 |
| 1335.9251 | 1360.1286 | 1396.1529 | 1419.0037 | 1445.9152 | 1455.5111 | 1478.3167 |
| 1574.9260 | 3015.3118 | 3022.8025 | 3037.8906 | 3067.1834 | 3104.8123 | 3161.8998 |
| 3181.2885 | 3223.8621 | 3783.9535 |           |           |           |           |

== Thermochemistry energies (hartree) ==

|         |             |                                 |
|---------|-------------|---------------------------------|
| ZPVE =  | 0.134952    | (after scaling by 0.9854)       |
| G4 Ee = | -384.243986 | (total electronic energy)       |
| G4 U0 = | -384.109034 | (Zero-kelvin internal energy)   |
| G4 UT = | -384.100753 | (Internal energy at 298.15 K)   |
| G4 HT = | -384.099809 | (Enthalpy at 298.15 K)          |
| G4 GT = | -384.142593 | (Gibbs free energy at 298.15 K) |

# Hydrocarbon 9: cyclohexadienyl

Species 1: ·R

[ G4 data ]

== B3LYP/6-31G(2df,p) equilibrium geometry (Angstrom) ==

|   |           |           |           |
|---|-----------|-----------|-----------|
| C | 0.739991  | -1.223502 | -0.000038 |
| C | 1.453654  | 0.000001  | -0.000065 |
| C | 0.739989  | 1.223503  | -0.000028 |
| C | -0.622331 | 1.254147  | 0.000033  |
| C | -1.447519 | -0.000001 | 0.000065  |
| C | -0.622329 | -1.254148 | 0.000023  |
| H | -2.137853 | 0.000002  | -0.864876 |
| H | -2.137776 | -0.000006 | 0.865068  |
| H | -1.151043 | 2.202331  | 0.000061  |
| H | 1.295920  | 2.156770  | -0.000049 |
| H | 2.537129  | 0.000002  | -0.000114 |
| H | -1.151039 | -2.202333 | 0.000043  |
| H | 1.295924  | -2.156767 | -0.000067 |

== B3LYP/6-31G(2df,p) harmonic frequencies (cm<sup>-1</sup>) ==

|           |           |           |           |           |           |           |
|-----------|-----------|-----------|-----------|-----------|-----------|-----------|
| 182.6707  | 384.9461  | 530.5428  | 561.1570  | 588.9585  | 646.0198  | 733.4097  |
| 773.7465  | 872.4882  | 936.8705  | 968.3608  | 969.2326  | 980.0754  | 987.2943  |
| 993.9733  | 1114.4403 | 1166.6864 | 1171.7547 | 1198.9860 | 1309.2668 | 1360.3413 |
| 1408.9065 | 1435.9745 | 1454.9387 | 1544.4797 | 1610.3738 | 2905.9071 | 2918.6092 |
| 3158.3743 | 3160.3792 | 3179.1297 | 3180.0507 | 3202.8703 |           |           |

== Thermochemistry energies (hartree) ==

|         |             |                                 |
|---------|-------------|---------------------------------|
| ZPVE =  | 0.106838    | (after scaling by 0.9854)       |
| G4 Ee = | -232.737066 | (total electronic energy)       |
| G4 U0 = | -232.630228 | (Zero-kelvin internal energy)   |
| G4 UT = | -232.625114 | (Internal energy at 298.15 K)   |
| G4 HT = | -232.624170 | (Enthalpy at 298.15 K)          |
| G4 GT = | -232.659004 | (Gibbs free energy at 298.15 K) |

## Species 2: ROO·

[ G4 data ]

== B3LYP/6-31G(2df,p) equilibrium geometry (Angstrom) ==

|   |           |           |           |
|---|-----------|-----------|-----------|
| C | 1.946071  | 0.366753  | -0.521657 |
| C | 1.652862  | -1.016761 | -0.157044 |
| C | 0.488296  | -1.370240 | 0.406502  |
| C | -0.584308 | -0.348138 | 0.614601  |
| C | -0.068987 | 1.085551  | 0.721912  |
| C | 1.141918  | 1.361002  | -0.124033 |
| H | 0.180828  | 1.285600  | 1.775366  |
| H | -0.900237 | 1.756520  | 0.481247  |
| H | 0.268320  | -2.402310 | 0.655118  |
| H | 2.410481  | -1.769431 | -0.354919 |
| O | -1.483356 | -0.468771 | -0.583038 |
| H | -1.235267 | -0.584020 | 1.458794  |
| O | -2.565433 | 0.253708  | -0.441339 |
| H | 1.370027  | 2.395194  | -0.362023 |
| H | 2.841039  | 0.569948  | -1.100238 |

== B3LYP/6-31G(2df,p) harmonic frequencies (cm<sup>-1</sup>) ==

|           |           |           |           |           |           |           |
|-----------|-----------|-----------|-----------|-----------|-----------|-----------|
| 78.9669   | 124.4064  | 209.8113  | 313.5798  | 378.6430  | 470.4839  | 511.8397  |
| 590.4836  | 611.1580  | 670.0181  | 787.0555  | 806.6984  | 852.8027  | 951.1396  |
| 964.5550  | 977.6224  | 989.2602  | 1000.9962 | 1009.3982 | 1101.7329 | 1171.7363 |
| 1205.8211 | 1206.9190 | 1215.7556 | 1319.1811 | 1337.6998 | 1355.8018 | 1409.6011 |
| 1442.4400 | 1450.8066 | 1640.2591 | 1710.7435 | 2997.4347 | 3076.6886 | 3091.5821 |
| 3165.9573 | 3174.0595 | 3192.3142 | 3198.8966 |           |           |           |

== Thermochemistry energies (hartree) ==

|         |             |                                 |
|---------|-------------|---------------------------------|
| ZPVE =  | 0.116206    | (after scaling by 0.9854)       |
| G4 Ee = | -383.046297 | (total electronic energy)       |
| G4 U0 = | -382.930091 | (Zero-kelvin internal energy)   |
| G4 UT = | -382.922921 | (Internal energy at 298.15 K)   |
| G4 HT = | -382.921977 | (Enthalpy at 298.15 K)          |
| G4 GT = | -382.962447 | (Gibbs free energy at 298.15 K) |



### Species 3: ·QOOH

[ G4 data ]

== B3LYP/6-31G(2df,p) equilibrium geometry (Angstrom) ==

|   |           |           |           |
|---|-----------|-----------|-----------|
| C | 2.225941  | 0.304246  | -0.235867 |
| C | 1.782209  | -1.031978 | -0.094343 |
| C | 0.490669  | -1.321029 | 0.231339  |
| C | -0.527426 | -0.248381 | 0.460862  |
| C | 0.016149  | 1.138281  | 0.294811  |
| C | 1.316396  | 1.371198  | -0.040757 |
| H | -0.680159 | 1.955671  | 0.447822  |
| H | 0.145499  | -2.344878 | 0.322887  |
| H | 2.488942  | -1.841832 | -0.248322 |
| O | -1.602422 | -0.531515 | -0.480441 |
| H | -0.979838 | -0.360679 | 1.460952  |
| O | -2.759467 | 0.225051  | -0.050235 |
| H | -2.826470 | 0.868427  | -0.769506 |
| H | 3.256300  | 0.509139  | -0.502085 |
| H | 1.667209  | 2.391836  | -0.162617 |

== B3LYP/6-31G(2df,p) harmonic frequencies (cm<sup>-1</sup>) ==

|           |           |           |           |           |           |           |
|-----------|-----------|-----------|-----------|-----------|-----------|-----------|
| 80.6606   | 123.4032  | 230.7530  | 259.0123  | 369.6007  | 382.8152  | 451.5817  |
| 564.3703  | 583.6103  | 621.0640  | 690.7445  | 758.2268  | 810.5953  | 882.7285  |
| 924.2795  | 929.9278  | 963.7857  | 977.7121  | 994.4166  | 1003.0443 | 1040.8364 |
| 1124.1904 | 1162.5861 | 1192.9556 | 1299.1507 | 1315.9314 | 1349.2404 | 1375.5684 |
| 1409.2601 | 1448.5617 | 1542.9318 | 1597.0315 | 2943.0869 | 3164.6466 | 3170.0165 |
| 3190.9943 | 3194.9566 | 3204.2555 | 3759.3203 |           |           |           |

== Thermochemistry energies (hartree) ==

|         |             |                                 |
|---------|-------------|---------------------------------|
| ZPVE =  | 0.114687    | (after scaling by 0.9854)       |
| G4 Ee = | -383.055369 | (total electronic energy)       |
| G4 U0 = | -382.940682 | (Zero-kelvin internal energy)   |
| G4 UT = | -382.933138 | (Internal energy at 298.15 K)   |
| G4 HT = | -382.932194 | (Enthalpy at 298.15 K)          |
| G4 GT = | -382.973274 | (Gibbs free energy at 298.15 K) |

### Species 4: *cy*-ether

[ G4 data ]

== B3LYP/6-31G(2df,p) equilibrium geometry (Angstrom) ==

|   |           |           |           |
|---|-----------|-----------|-----------|
| C | -0.262383 | 1.416858  | -0.723505 |
| C | -0.262383 | 1.416858  | 0.723505  |
| C | -0.262383 | 0.266294  | 1.430151  |
| C | -0.048925 | -1.020134 | 0.759443  |
| C | -0.048925 | -1.020134 | -0.759443 |
| C | -0.262383 | 0.266294  | -1.430151 |
| H | -0.444533 | 0.265464  | 2.499827  |
| H | -0.379401 | 2.367325  | 1.234586  |
| O | 1.153133  | -1.170794 | -0.000000 |
| H | -0.346458 | -1.927723 | 1.281871  |
| H | -0.346458 | -1.927723 | -1.281871 |
| H | -0.444533 | 0.265464  | -2.499827 |
| H | -0.379401 | 2.367325  | -1.234586 |

== B3LYP/6-31G(2df,p) harmonic frequencies (cm<sup>-1</sup>) ==

|           |           |           |           |           |           |           |
|-----------|-----------|-----------|-----------|-----------|-----------|-----------|
| 253.7927  | 318.0619  | 464.7663  | 540.3432  | 616.3297  | 638.2910  | 700.1100  |
| 782.2493  | 782.5579  | 854.4873  | 935.8458  | 963.4724  | 972.6337  | 982.0710  |
| 985.3129  | 1008.5607 | 1057.5928 | 1131.8041 | 1187.6446 | 1204.6776 | 1259.4584 |
| 1354.9766 | 1381.0430 | 1421.6052 | 1461.0299 | 1601.3081 | 1683.1944 | 3118.2390 |
| 3127.6730 | 3165.4700 | 3174.6024 | 3187.5457 | 3195.3965 |           |           |

== Thermochemistry energies (hartree) ==

|         |             |                                 |
|---------|-------------|---------------------------------|
| ZPVE =  | 0.102171    | (after scaling by 0.9854)       |
| G4 Ee = | -307.331379 | (total electronic energy)       |
| G4 U0 = | -307.229208 | (Zero-kelvin internal energy)   |
| G4 UT = | -307.223966 | (Internal energy at 298.15 K)   |
| G4 HT = | -307.223022 | (Enthalpy at 298.15 K)          |
| G4 GT = | -307.257859 | (Gibbs free energy at 298.15 K) |

## Species 5: benzene

[ G4 data ]

== B3LYP/6-31G(2df,p) equilibrium geometry (Angstrom) ==

|   |           |           |           |
|---|-----------|-----------|-----------|
| C | 0.000000  | 1.206843  | 0.696770  |
| C | -0.000000 | 0.000000  | 1.393539  |
| C | -0.000000 | -1.206843 | 0.696770  |
| C | -0.000000 | -1.206843 | -0.696770 |
| C | 0.000000  | 0.000000  | -1.393539 |
| C | 0.000000  | 1.206843  | -0.696770 |
| H | 0.000000  | 0.000000  | -2.478699 |
| H | -0.000000 | -2.146618 | 1.239352  |
| H | -0.000000 | -0.000000 | 2.478699  |
| H | 0.000000  | -2.146618 | -1.239352 |
| H | 0.000000  | 2.146618  | 1.239352  |
| H | 0.000000  | 2.146618  | -1.239352 |

== B3LYP/6-31G(2df,p) harmonic frequencies (cm<sup>-1</sup>) ==

|           |           |           |           |           |           |           |
|-----------|-----------|-----------|-----------|-----------|-----------|-----------|
| 412.6837  | 412.6965  | 616.8121  | 616.8305  | 699.6459  | 722.2103  | 872.0520  |
| 872.1792  | 960.5059  | 960.6148  | 1008.6967 | 1014.5758 | 1016.3494 | 1061.7862 |
| 1061.8144 | 1173.5994 | 1198.0351 | 1198.0629 | 1338.5753 | 1362.0895 | 1511.4832 |
| 1511.4941 | 1634.3631 | 1634.3704 | 3163.2958 | 3172.9944 | 3173.0556 | 3189.1759 |
| 3189.2419 | 3200.0498 |           |           |           |           |           |

== Thermochemistry energies (hartree) ==

|         |             |                                 |
|---------|-------------|---------------------------------|
| ZPVE =  | 0.098685    | (after scaling by 0.9854)       |
| G4 Ee = | -232.192697 | (total electronic energy)       |
| G4 U0 = | -232.094012 | (Zero-kelvin internal energy)   |
| G4 UT = | -232.089556 | (Internal energy at 298.15 K)   |
| G4 HT = | -232.088612 | (Enthalpy at 298.15 K)          |
| G4 GT = | -232.120188 | (Gibbs free energy at 298.15 K) |

Species 6: Transition state along  $\text{ROO} \cdot \xrightarrow{\text{TS1}} \cdot\text{QOOH}$

[ G4 data ]

== B3LYP/6-31G(2df,p) equilibrium geometry (Angstrom) ==

|   |           |           |           |
|---|-----------|-----------|-----------|
| C | 2.044127  | -0.164733 | 0.263335  |
| C | 1.458058  | 1.153044  | 0.236331  |
| C | 0.204894  | 1.358210  | -0.213721 |
| C | -0.668353 | 0.243502  | -0.744896 |
| C | -0.092645 | -1.153534 | -0.379659 |
| C | 1.301014  | -1.265195 | -0.067629 |
| H | -0.529696 | -1.977484 | -0.945474 |
| H | -0.825588 | -1.081421 | 0.688370  |
| H | -0.235555 | 2.350637  | -0.226729 |
| H | 2.057616  | 1.992812  | 0.574393  |
| O | -1.930778 | 0.243279  | -0.231674 |
| H | -0.798005 | 0.373994  | -1.831859 |
| O | -1.818353 | -0.263747 | 1.066711  |
| H | 1.756753  | -2.250702 | -0.050261 |
| H | 3.084952  | -0.271852 | 0.548694  |

== B3LYP/6-31G(2df,p) harmonic frequencies (cm<sup>-1</sup>) ==

|            |           |           |           |           |           |           |
|------------|-----------|-----------|-----------|-----------|-----------|-----------|
| -2081.4514 | 65.4400   | 189.9834  | 340.6806  | 394.9551  | 483.0895  | 501.6953  |
| 583.5703   | 648.3990  | 664.9857  | 748.8786  | 792.9358  | 827.8749  | 905.8037  |
| 932.3641   | 967.3392  | 978.2692  | 985.6127  | 1001.9949 | 1030.1643 | 1098.7304 |
| 1166.8467  | 1170.6288 | 1197.0845 | 1240.8331 | 1274.1935 | 1347.2653 | 1365.4533 |
| 1415.4699  | 1468.2634 | 1510.0597 | 1648.3481 | 1747.5389 | 2970.3894 | 3115.2509 |
| 3165.5329  | 3172.6995 | 3185.5274 | 3198.2842 |           |           |           |

== Thermochemistry energies (hartree) ==

|         |             |                                 |
|---------|-------------|---------------------------------|
| ZPVE =  | 0.111128    | (after scaling by 0.9854)       |
| G4 Ee = | -382.993723 | (total electronic energy)       |
| G4 U0 = | -382.882595 | (Zero-kelvin internal energy)   |
| G4 UT = | -382.876042 | (Internal energy at 298.15 K)   |
| G4 HT = | -382.875098 | (Enthalpy at 298.15 K)          |
| G4 GT = | -382.914280 | (Gibbs free energy at 298.15 K) |

Species 7: Transition state along  $\text{ROO}\cdot \xrightarrow{\text{TS}_2} \text{alkene} + \cdot\text{OOH}$

[ G4 data ]

== B3LYP/6-31G(2df,p) equilibrium geometry (Angstrom) ==

|   |           |           |           |
|---|-----------|-----------|-----------|
| C | -1.930099 | -0.485886 | -0.571184 |
| C | -1.700419 | 0.919147  | -0.443245 |
| C | -0.657213 | 1.401805  | 0.315314  |
| C | 0.247556  | 0.521682  | 0.928746  |
| C | 0.085658  | -0.936519 | 0.791555  |
| C | -1.115458 | -1.375057 | 0.047418  |
| H | 0.232364  | -1.482848 | 1.731975  |
| H | 1.012673  | -1.258162 | 0.187623  |
| H | -0.529348 | 2.471085  | 0.446250  |
| H | -2.384505 | 1.611082  | -0.923339 |
| O | 2.048461  | 0.639737  | -0.402771 |
| H | 0.935083  | 0.897008  | 1.675350  |
| O | 2.356689  | -0.544467 | -0.642182 |
| H | -1.303660 | -2.441692 | -0.024272 |
| H | -2.783952 | -0.829673 | -1.145589 |

== B3LYP/6-31G(2df,p) harmonic frequencies (cm<sup>-1</sup>) ==

|           |           |           |           |           |           |           |
|-----------|-----------|-----------|-----------|-----------|-----------|-----------|
| -164.0472 | 83.9462   | 108.5069  | 132.9001  | 262.0462  | 377.1763  | 448.3527  |
| 572.9756  | 588.7342  | 599.0074  | 704.9926  | 818.4272  | 849.5874  | 899.6663  |
| 925.0614  | 972.7726  | 998.5488  | 999.0399  | 1002.0455 | 1015.4883 | 1130.0275 |
| 1170.8722 | 1182.2837 | 1204.0808 | 1352.7698 | 1371.2133 | 1377.7966 | 1421.6039 |
| 1450.3222 | 1477.0656 | 1535.4057 | 1641.2849 | 2331.2397 | 3034.8405 | 3169.9318 |
| 3177.6204 | 3188.7684 | 3198.1340 | 3214.5468 |           |           |           |

== Thermochemistry energies (hartree) ==

|         |             |                                 |
|---------|-------------|---------------------------------|
| ZPVE =  | 0.112221    | (after scaling by 0.9854)       |
| G4 Ee = | -383.010677 | (total electronic energy)       |
| G4 U0 = | -382.898456 | (Zero-kelvin internal energy)   |
| G4 UT = | -382.891154 | (Internal energy at 298.15 K)   |
| G4 HT = | -382.890210 | (Enthalpy at 298.15 K)          |
| G4 GT = | -382.931312 | (Gibbs free energy at 298.15 K) |

Species 8: Transition state along  $\cdot\text{QOOH} \xrightarrow{\text{TS}_3} \text{alkene} + \cdot\text{OOH}$

[ G4 data ]

== B3LYP/6-31G(2df,p) equilibrium geometry (Angstrom) ==

|   |           |           |           |
|---|-----------|-----------|-----------|
| C | 2.129939  | 0.322467  | -0.434348 |
| C | 1.759400  | -1.012704 | -0.191146 |
| C | 0.553344  | -1.308738 | 0.399090  |
| C | -0.394513 | -0.263674 | 0.696985  |
| C | 0.064060  | 1.094036  | 0.544284  |
| C | 1.277194  | 1.367814  | -0.048648 |
| H | -0.591944 | 1.899310  | 0.858113  |
| H | 0.268846  | -2.336030 | 0.596373  |
| H | 2.443986  | -1.812767 | -0.453941 |
| O | -1.611603 | -0.471336 | -0.606990 |
| H | -1.120899 | -0.457661 | 1.479843  |
| O | -2.796605 | 0.165476  | -0.206867 |
| H | -2.740490 | 1.018716  | -0.662867 |
| H | 3.084642  | 0.543414  | -0.898849 |
| H | 1.584986  | 2.396692  | -0.205127 |

== B3LYP/6-31G(2df,p) harmonic frequencies (cm<sup>-1</sup>) ==

|           |           |           |           |           |           |           |
|-----------|-----------|-----------|-----------|-----------|-----------|-----------|
| -570.8798 | 60.9834   | 118.7750  | 176.3732  | 322.4477  | 382.8403  | 408.0593  |
| 423.1762  | 597.9029  | 601.8888  | 654.9258  | 721.1801  | 812.1019  | 874.7160  |
| 926.0583  | 960.6706  | 963.2890  | 982.5005  | 1008.0165 | 1023.4480 | 1049.2184 |
| 1105.6918 | 1165.5993 | 1169.9099 | 1195.7653 | 1327.3685 | 1358.8438 | 1386.0986 |
| 1469.9416 | 1478.5650 | 1551.9095 | 1593.7741 | 3158.8717 | 3170.4527 | 3175.5778 |
| 3187.9407 | 3196.0584 | 3203.2885 | 3711.7269 |           |           |           |

== Thermochemistry energies (hartree) ==

|         |             |                                 |
|---------|-------------|---------------------------------|
| ZPVE =  | 0.113763    | (after scaling by 0.9854)       |
| G4 Ee = | -383.037315 | (total electronic energy)       |
| G4 U0 = | -382.923552 | (Zero-kelvin internal energy)   |
| G4 UT = | -382.916130 | (Internal energy at 298.15 K)   |
| G4 HT = | -382.915186 | (Enthalpy at 298.15 K)          |
| G4 GT = | -382.956419 | (Gibbs free energy at 298.15 K) |

Species 9: Transition state along  $\cdot\text{QOOH} \xrightarrow{\text{TS4}} \text{cycloether} + \cdot\text{OH}$

[ G4 data ]

== B3LYP/6-31G(2df,p) equilibrium geometry (Angstrom) ==

|   |           |           |           |
|---|-----------|-----------|-----------|
| C | 1.949345  | 0.300275  | -0.541836 |
| C | 1.600493  | -1.003920 | -0.272913 |
| C | 0.431860  | -1.291195 | 0.453988  |
| C | -0.509301 | -0.196182 | 0.829590  |
| C | 0.030145  | 1.186712  | 0.652810  |
| C | 1.165266  | 1.398934  | -0.049862 |
| H | -0.530799 | 2.008039  | 1.083679  |
| H | 0.178305  | -2.300113 | 0.747496  |
| H | 2.235937  | -1.819777 | -0.600232 |
| O | -1.159327 | -0.724067 | -0.299595 |
| H | -1.082698 | -0.330692 | 1.752391  |
| O | -2.685663 | 0.306116  | -0.531518 |
| H | -2.428450 | 0.498365  | -1.445059 |
| H | 2.853583  | 0.511573  | -1.103052 |
| H | 1.527190  | 2.408464  | -0.216973 |

== B3LYP/6-31G(2df,p) harmonic frequencies (cm<sup>-1</sup>) ==

|           |           |           |           |           |           |           |
|-----------|-----------|-----------|-----------|-----------|-----------|-----------|
| -717.7232 | 74.8417   | 134.4961  | 182.6777  | 213.2320  | 298.9961  | 357.7806  |
| 451.4641  | 568.6267  | 583.2618  | 621.4947  | 734.6745  | 779.3750  | 822.8349  |
| 857.5116  | 905.1142  | 941.3920  | 956.6323  | 981.8317  | 986.5930  | 997.0234  |
| 1052.9944 | 1143.0826 | 1178.1178 | 1188.1396 | 1271.9636 | 1334.7275 | 1361.9951 |
| 1424.0060 | 1466.5478 | 1514.5586 | 1638.9198 | 3051.4699 | 3171.6929 | 3181.4588 |
| 3196.1240 | 3204.6375 | 3233.8083 | 3779.6801 |           |           |           |

== Thermochemistry energies (hartree) ==

|         |             |                                 |
|---------|-------------|---------------------------------|
| ZPVE =  | 0.111895    | (after scaling by 0.9854)       |
| G4 Ee = | -383.012994 | (total electronic energy)       |
| G4 U0 = | -382.901099 | (Zero-kelvin internal energy)   |
| G4 UT = | -382.893350 | (Internal energy at 298.15 K)   |
| G4 HT = | -382.892406 | (Enthalpy at 298.15 K)          |
| G4 GT = | -382.933996 | (Gibbs free energy at 298.15 K) |

# Hydrocarbon 10: 2-(cyclohexa-2,4-dien-1-yl)ethyl

Species 1: ·R

[ G4 data ]

== B3LYP/6-31G(2df,p) equilibrium geometry (Angstrom) ==

|   |           |           |           |
|---|-----------|-----------|-----------|
| C | -0.011664 | -1.110425 | 0.277232  |
| C | -1.478108 | -1.327419 | -0.008438 |
| C | -2.312519 | -0.284069 | -0.099429 |
| C | -1.806555 | 1.082473  | 0.040132  |
| C | -0.492938 | 1.335074  | -0.021593 |
| C | 0.503334  | 0.227346  | -0.286277 |
| H | 0.592235  | -1.934351 | -0.115081 |
| H | 0.138303  | -1.123282 | 1.370972  |
| H | -1.849190 | -2.346169 | -0.069766 |
| H | -3.377024 | -0.431552 | -0.254210 |
| H | -2.520079 | 1.889712  | 0.176951  |
| H | -0.116504 | 2.352174  | 0.054403  |
| C | 1.912297  | 0.570762  | 0.237509  |
| H | 0.583486  | 0.122395  | -1.383618 |
| C | 2.968121  | -0.392579 | -0.178949 |
| H | 2.947529  | -0.834694 | -1.170094 |
| H | 3.859336  | -0.542552 | 0.418762  |
| H | 1.883682  | 0.655430  | 1.332619  |
| H | 2.166413  | 1.585911  | -0.122061 |

== B3LYP/6-31G(2df,p) harmonic frequencies (cm<sup>-1</sup>) ==

|           |           |           |           |           |           |           |
|-----------|-----------|-----------|-----------|-----------|-----------|-----------|
| 92.7428   | 127.7390  | 145.9200  | 206.0138  | 285.3615  | 370.8510  | 405.7364  |
| 463.1924  | 505.5866  | 542.1560  | 581.8264  | 698.2050  | 768.7338  | 785.2291  |
| 818.0229  | 910.6072  | 936.2716  | 961.5520  | 977.1366  | 986.7605  | 992.8408  |
| 1038.3794 | 1090.1033 | 1094.5560 | 1116.2382 | 1174.6969 | 1184.1106 | 1204.4708 |
| 1244.9121 | 1288.9227 | 1324.5349 | 1363.0994 | 1368.6668 | 1394.7165 | 1437.4797 |
| 1459.9018 | 1465.0308 | 1470.0238 | 1644.6022 | 1707.1752 | 2916.5581 | 2933.5882 |
| 2960.6803 | 3025.1265 | 3071.5026 | 3143.6534 | 3149.2059 | 3160.3792 | 3174.2574 |
| 3186.8167 | 3247.6415 |           |           |           |           |           |

== Thermochemistry energies (hartree) ==

|         |             |                                 |
|---------|-------------|---------------------------------|
| ZPVE =  | 0.160743    | (after scaling by 0.9854)       |
| G4 Ee = | -311.313403 | (total electronic energy)       |
| G4 U0 = | -311.152660 | (Zero-kelvin internal energy)   |
| G4 UT = | -311.144311 | (Internal energy at 298.15 K)   |
| G4 HT = | -311.143367 | (Enthalpy at 298.15 K)          |
| G4 GT = | -311.185854 | (Gibbs free energy at 298.15 K) |

[ CCSDT-F12a/cc-pVDZ-F12 data ]

CCSD(T)-F12a/cc-pVDZ-F12 Ee = -310.893403 (total electronic energy)



## Species 2: ROO·

[ G4 data ]

== B3LYP/6-31G(2df,p) equilibrium geometry (Angstrom) ==

|   |           |           |           |
|---|-----------|-----------|-----------|
| C | -0.609257 | -0.824475 | 0.749263  |
| C | -1.957790 | -1.376051 | 0.352663  |
| C | -2.891486 | -0.586267 | -0.190526 |
| C | -2.611346 | 0.827714  | -0.442835 |
| C | -1.360165 | 1.299064  | -0.387372 |
| C | -0.185177 | 0.383628  | -0.111166 |
| H | 0.154063  | -1.604260 | 0.678554  |
| H | -0.652844 | -0.527833 | 1.812416  |
| H | -2.169297 | -2.417182 | 0.576976  |
| H | -3.876044 | -0.973043 | -0.434571 |
| H | -3.438257 | 1.485320  | -0.693697 |
| H | -1.149965 | 2.344014  | -0.601320 |
| C | 0.984259  | 1.172452  | 0.505357  |
| H | 0.155500  | -0.005196 | -1.084453 |
| C | 2.275030  | 0.392287  | 0.732555  |
| H | 2.138878  | -0.495525 | 1.352713  |
| H | 3.043330  | 1.035369  | 1.171831  |
| H | 0.678901  | 1.575681  | 1.480511  |
| H | 1.212651  | 2.037514  | -0.129438 |
| O | 2.860576  | -0.050076 | -0.525633 |
| O | 2.394258  | -1.223045 | -0.896512 |

== B3LYP/6-31G(2df,p) harmonic frequencies (cm<sup>-1</sup>) ==

|           |           |           |           |           |           |           |
|-----------|-----------|-----------|-----------|-----------|-----------|-----------|
| 55.7402   | 71.2979   | 88.2878   | 137.1121  | 188.5633  | 271.8733  | 313.6895  |
| 410.5818  | 424.3850  | 486.1849  | 537.5208  | 544.9939  | 581.6208  | 698.3974  |
| 755.1117  | 786.9743  | 818.9749  | 868.7889  | 920.3942  | 961.2427  | 973.1242  |
| 978.0465  | 992.3505  | 997.0552  | 1025.2756 | 1055.3392 | 1104.2355 | 1131.1395 |
| 1182.2696 | 1184.0899 | 1202.8280 | 1218.7940 | 1244.1566 | 1281.9088 | 1325.0545 |
| 1332.7397 | 1367.8453 | 1382.6558 | 1386.2183 | 1398.0866 | 1440.2407 | 1468.2041 |
| 1474.1385 | 1478.9738 | 1650.6386 | 1711.5456 | 2948.1398 | 2974.6824 | 3019.0543 |
| 3058.6548 | 3068.2796 | 3082.3704 | 3133.3060 | 3149.9784 | 3162.5183 | 3176.0070 |
| 3188.8241 |           |           |           |           |           |           |

== Thermochemistry energies (hartree) ==

ZPVE = 0.172567 (after scaling by 0.9854)  
G4 Ee = -461.657025 (total electronic energy)  
G4 U0 = -461.484458 (Zero-kelvin internal energy)  
G4 UT = -461.474705 (Internal energy at 298.15 K)  
G4 HT = -461.473761 (Enthalpy at 298.15 K)  
G4 GT = -461.520936 (Gibbs free energy at 298.15 K)

[ CCSDT-F12a/cc-pVDZ-F12 data ]

CCSD(T)-F12a/cc-pVDZ-F12 Ee = -461.131377 (total electronic energy)

### Species 3: *syn*-QOOH

[ G4 data ]

== B3LYP/6-31G(2df,p) equilibrium geometry (Angstrom) ==

|   |           |           |           |
|---|-----------|-----------|-----------|
| C | 0.777981  | 1.305485  | -0.167774 |
| C | 2.151175  | 0.993438  | -0.685833 |
| C | 2.775777  | -0.187306 | -0.420567 |
| C | 2.155069  | -1.181575 | 0.372949  |
| C | 0.864747  | -0.947788 | 0.906517  |
| C | 0.173097  | 0.212163  | 0.678657  |
| H | 0.105847  | 1.532282  | -1.014655 |
| H | 0.793202  | 2.251698  | 0.406249  |
| H | 2.636853  | 1.749375  | -1.294917 |
| H | 3.768103  | -0.373470 | -0.820403 |
| H | 2.665346  | -2.114319 | 0.581549  |
| H | 0.410344  | -1.713026 | 1.531514  |
| C | -1.185126 | 0.455508  | 1.278255  |
| H | -0.879892 | -1.151429 | -1.120507 |
| C | -2.351921 | 0.555696  | 0.276240  |
| H | -2.224249 | 1.391236  | -0.421387 |
| H | -3.288282 | 0.707255  | 0.826669  |
| H | -1.175346 | 1.399587  | 1.845798  |
| H | -1.419464 | -0.342692 | 1.991014  |
| O | -2.574967 | -0.639748 | -0.455280 |
| O | -1.619690 | -0.681529 | -1.537418 |

== B3LYP/6-31G(2df,p) harmonic frequencies (cm<sup>-1</sup>) ==

|           |           |           |           |           |           |           |
|-----------|-----------|-----------|-----------|-----------|-----------|-----------|
| 55.8844   | 70.5048   | 116.4019  | 148.5324  | 208.9811  | 276.3272  | 351.1578  |
| 358.5839  | 399.6448  | 450.2734  | 498.6349  | 535.5809  | 564.8079  | 585.7858  |
| 678.7676  | 733.5142  | 765.1269  | 841.8715  | 887.9998  | 922.9112  | 938.9246  |
| 948.1627  | 972.3203  | 974.1593  | 978.5481  | 1006.0663 | 1051.3717 | 1064.7582 |
| 1133.8357 | 1177.5945 | 1183.3396 | 1196.3331 | 1228.1431 | 1279.8240 | 1308.3559 |
| 1339.0058 | 1368.1022 | 1391.2112 | 1407.0337 | 1421.9042 | 1430.4637 | 1441.6973 |
| 1463.0134 | 1468.4791 | 1542.7049 | 1611.6608 | 2912.4760 | 2938.6552 | 2985.2121 |
| 3031.2776 | 3063.9164 | 3085.1174 | 3152.3889 | 3163.8173 | 3182.5535 | 3203.2081 |
| 3708.9467 |           |           |           |           |           |           |

== Thermochemistry energies (hartree) ==

ZPVE = 0.171075 (after scaling by 0.9854)  
G4 Ee = -461.674724 (total electronic energy)  
G4 U0 = -461.503649 (Zero-kelvin internal energy)  
G4 UT = -461.493704 (Internal energy at 298.15 K)  
G4 HT = -461.492760 (Enthalpy at 298.15 K)  
G4 GT = -461.539874 (Gibbs free energy at 298.15 K)

[ CCSDT-F12a/cc-pVDZ-F12 data ]

CCSD(T)-F12a/cc-pVDZ-F12 Ee = (total electronic energy)

## Species 4: *anti*-QOOH

[ G4 data ]

== B3LYP/6-31G(2df,p) equilibrium geometry (Angstrom) ==

|   |           |           |           |
|---|-----------|-----------|-----------|
| C | 1.137741  | 1.288430  | -0.247131 |
| C | 2.434519  | 0.824739  | -0.842220 |
| C | 2.932723  | -0.419984 | -0.605417 |
| C | 2.241502  | -1.341958 | 0.217168  |
| C | 1.010428  | -0.971146 | 0.804800  |
| C | 0.447037  | 0.258735  | 0.611312  |
| H | 0.459845  | 1.632670  | -1.051372 |
| H | 1.300694  | 2.210842  | 0.344681  |
| H | 2.973048  | 1.524899  | -1.473350 |
| H | 3.877199  | -0.715505 | -1.052981 |
| H | 2.651894  | -2.328486 | 0.397253  |
| H | 0.491432  | -1.690618 | 1.432731  |
| C | -0.862075 | 0.647037  | 1.243414  |
| H | -3.018302 | -0.804843 | -1.871170 |
| C | -2.049351 | 0.703214  | 0.272066  |
| H | -1.831799 | 1.340948  | -0.596510 |
| H | -2.938867 | 1.103117  | 0.775706  |
| H | -0.781251 | 1.644500  | 1.698744  |
| H | -1.116479 | -0.052745 | 2.046429  |
| O | -2.290335 | -0.630568 | -0.147295 |
| O | -3.437485 | -0.594330 | -1.024469 |

== B3LYP/6-31G(2df,p) harmonic frequencies (cm<sup>-1</sup>) ==

|           |           |           |           |           |           |           |
|-----------|-----------|-----------|-----------|-----------|-----------|-----------|
| 25.8852   | 55.1364   | 95.8126   | 125.7243  | 204.7119  | 226.1828  | 253.9153  |
| 319.5407  | 354.0321  | 432.3567  | 496.1492  | 533.1866  | 567.2736  | 586.5369  |
| 679.5363  | 740.1891  | 762.4241  | 830.0020  | 918.6352  | 923.4036  | 946.7878  |
| 965.0467  | 971.4205  | 978.5227  | 986.6915  | 1006.0488 | 1069.4923 | 1071.5970 |
| 1134.8479 | 1175.8458 | 1181.5065 | 1190.8705 | 1226.6955 | 1256.4365 | 1306.3857 |
| 1341.5869 | 1362.1221 | 1382.9088 | 1395.0875 | 1422.0328 | 1430.4523 | 1441.8013 |
| 1466.2375 | 1522.1650 | 1546.6556 | 1616.0261 | 2894.2104 | 2912.6327 | 2998.0475 |
| 3007.9899 | 3043.3473 | 3077.3563 | 3158.7388 | 3161.5583 | 3180.1294 | 3201.6828 |
| 3750.4943 |           |           |           |           |           |           |

== Thermochemistry energies (hartree) ==

ZPVE = 0.170416 (after scaling by 0.9854)  
G4 Ee = -461.672419 (total electronic energy)  
G4 U0 = -461.502003 (Zero-kelvin internal energy)  
G4 UT = -461.491593 (Internal energy at 298.15 K)  
G4 HT = -461.490648 (Enthalpy at 298.15 K)  
G4 GT = -461.539854 (Gibbs free energy at 298.15 K)

[ CCSDT-F12a/cc-pVDZ-F12 data ]

CCSD(T)-F12a/cc-pVDZ-F12 Ee = (total electronic energy)

## Species 5: *cy*-ether

[ G4 data ]

== B3LYP/6-31G(2df,p) equilibrium geometry (Angstrom) ==

|   |           |           |           |
|---|-----------|-----------|-----------|
| C | -0.397756 | -1.256589 | 0.375285  |
| C | -1.815498 | -1.145524 | -0.109710 |
| C | -2.407370 | 0.048707  | -0.232140 |
| C | -1.667053 | 1.274764  | 0.050035  |
| C | -0.345302 | 1.264768  | 0.273711  |
| C | 0.458423  | 0.001069  | 0.180174  |
| H | 0.119630  | -2.097948 | -0.098857 |
| H | -0.421978 | -1.482433 | 1.454398  |
| H | -2.358904 | -2.064532 | -0.306963 |
| H | -3.445005 | 0.129629  | -0.539488 |
| H | -2.211728 | 2.214737  | 0.052364  |
| H | 0.201755  | 2.188770  | 0.437706  |
| C | 1.811460  | -0.007441 | 0.941002  |
| C | 2.461712  | 0.026494  | -0.452382 |
| H | 3.090631  | -0.833485 | -0.713349 |
| H | 3.010186  | 0.945704  | -0.693894 |
| H | 1.994562  | -0.916472 | 1.517833  |
| H | 1.992006  | 0.861152  | 1.576903  |
| O | 1.179643  | -0.022826 | -1.105314 |

== B3LYP/6-31G(2df,p) harmonic frequencies (cm<sup>-1</sup>) ==

|           |           |           |           |           |           |           |
|-----------|-----------|-----------|-----------|-----------|-----------|-----------|
| 71.1117   | 92.9159   | 222.7642  | 277.4595  | 368.8867  | 397.1420  | 420.1275  |
| 547.5357  | 576.9472  | 668.6623  | 707.0112  | 779.5892  | 804.4161  | 831.6198  |
| 853.1644  | 926.5683  | 950.0229  | 965.6860  | 978.6433  | 984.7370  | 998.4855  |
| 1009.7974 | 1025.2501 | 1037.1214 | 1145.5303 | 1156.3840 | 1169.7697 | 1203.8154 |
| 1214.1062 | 1227.7666 | 1266.1120 | 1297.5198 | 1344.0671 | 1353.1193 | 1400.9591 |
| 1435.4115 | 1446.0837 | 1489.4119 | 1533.3085 | 1639.6201 | 1711.2671 | 2975.9642 |
| 3011.7007 | 3047.7053 | 3063.8367 | 3071.0750 | 3125.9231 | 3154.6511 | 3165.8993 |
| 3176.3928 | 3190.8175 |           |           |           |           |           |

== Thermochemistry energies (hartree) ==

ZPVE = 0.158297 (after scaling by 0.9854)  
G4 Ee = -385.945745 (total electronic energy)  
G4 U0 = -385.787448 (Zero-kelvin internal energy)  
G4 UT = -385.779627 (Internal energy at 298.15 K)  
G4 HT = -385.778682 (Enthalpy at 298.15 K)  
G4 GT = -385.820057 (Gibbs free energy at 298.15 K)

[ CCSDT-F12a/cc-pVDZ-F12 data ]

CCSD(T)-F12a/cc-pVDZ-F12 Ee = -385.477755 (total electronic energy)

Species 6: Transition state along  $\text{ROO} \cdot \xrightarrow{\text{TS1}} \cdot\text{QOOH}$

[ G4 data ]

== B3LYP/6-31G(2df,p) equilibrium geometry (Angstrom) ==

|   |           |           |           |
|---|-----------|-----------|-----------|
| C | -0.711343 | -1.035674 | 0.750300  |
| C | -2.075450 | -1.252594 | 0.155934  |
| C | -2.793667 | -0.237053 | -0.353049 |
| C | -2.259695 | 1.110140  | -0.382481 |
| C | -0.969054 | 1.352365  | -0.042228 |
| C | -0.049915 | 0.274053  | 0.307989  |
| H | -0.051826 | -1.877173 | 0.504900  |
| H | -0.802450 | -1.052714 | 1.852515  |
| H | -2.490681 | -2.254715 | 0.204340  |
| H | -3.793387 | -0.408865 | -0.739215 |
| H | -2.902952 | 1.924671  | -0.698455 |
| H | -0.568667 | 2.360764  | -0.105318 |
| C | 1.214278  | 0.653678  | 1.080342  |
| H | 0.505683  | -0.055853 | -0.780562 |
| C | 2.453278  | -0.119901 | 0.590925  |
| H | 2.376841  | -1.191426 | 0.811240  |
| H | 3.370476  | 0.280474  | 1.033555  |
| H | 1.084912  | 0.465222  | 2.154767  |
| H | 1.412448  | 1.723830  | 0.958716  |
| O | 2.588873  | 0.064540  | -0.812054 |
| O | 1.537254  | -0.612577 | -1.418305 |

== B3LYP/6-31G(2df,p) harmonic frequencies (cm<sup>-1</sup>) ==

|            |           |           |           |           |           |           |
|------------|-----------|-----------|-----------|-----------|-----------|-----------|
| -1557.2705 | 79.6945   | 100.5731  | 148.8800  | 224.9850  | 302.7757  | 346.2857  |
| 392.2059   | 424.0598  | 497.3710  | 523.3313  | 549.2753  | 579.9892  | 631.8042  |
| 707.5143   | 759.8903  | 805.1005  | 858.0722  | 918.0009  | 927.1916  | 962.9049  |
| 971.8341   | 977.7069  | 991.9739  | 993.5448  | 1020.0033 | 1046.1357 | 1057.7835 |
| 1139.7887  | 1164.2369 | 1194.0333 | 1199.0325 | 1211.3215 | 1249.8793 | 1260.0985 |
| 1320.1310  | 1353.1068 | 1359.5693 | 1377.9516 | 1407.6207 | 1450.0129 | 1462.7877 |
| 1465.2010  | 1474.0410 | 1520.6878 | 1572.7471 | 1676.1182 | 2928.5860 | 3015.0090 |
| 3030.8309  | 3039.6972 | 3073.3483 | 3100.6904 | 3158.6788 | 3165.9284 | 3182.5897 |
| 3194.2898  |           |           |           |           |           |           |

== Thermochemistry energies (hartree) ==

ZPVE = 0.167351 (after scaling by 0.9854)  
G4 Ee = -461.626173 (total electronic energy)  
G4 U0 = -461.458822 (Zero-kelvin internal energy)  
G4 UT = -461.449948 (Internal energy at 298.15 K)  
G4 HT = -461.449004 (Enthalpy at 298.15 K)  
G4 GT = -461.493441 (Gibbs free energy at 298.15 K)

[ CCSDT-F12a/cc-pVDZ-F12 data ]

CCSD(T)-F12a/cc-pVDZ-F12 Ee = -461.102187 (total electronic energy)

Species 7: Transition state along  $\cdot\text{QOOH} \xrightarrow{\text{TS4}} \text{cycloether} + \cdot\text{OH}$

[ G4 data ]

== B3LYP/6-31G(2df,p) equilibrium geometry (Angstrom) ==

|   |           |           |           |
|---|-----------|-----------|-----------|
| C | 0.751152  | -0.133259 | 1.324374  |
| C | 1.950392  | 0.730727  | 1.079876  |
| C | 2.574683  | 0.749277  | -0.113947 |
| C | 2.084270  | -0.045890 | -1.208964 |
| C | 0.926420  | -0.771424 | -1.096482 |
| C | 0.146649  | -0.740655 | 0.085256  |
| H | -0.019448 | 0.420254  | 1.874682  |
| H | 1.043669  | -0.957043 | 2.005051  |
| H | 2.324932  | 1.313981  | 1.915093  |
| H | 3.459641  | 1.358701  | -0.265093 |
| H | 2.636950  | -0.053368 | -2.142634 |
| H | 0.556509  | -1.341641 | -1.942894 |
| C | -1.046022 | -1.670749 | 0.263934  |
| H | -2.253836 | 2.158769  | -1.092113 |
| C | -2.152723 | -0.616640 | 0.174299  |
| H | -2.586935 | -0.357756 | 1.147815  |
| H | -2.971282 | -0.860099 | -0.511330 |
| H | -1.016665 | -2.220187 | 1.210911  |
| H | -1.094700 | -2.397060 | -0.551357 |
| O | -1.351657 | 0.457222  | -0.322981 |
| O | -2.584314 | 1.783669  | -0.264295 |

== B3LYP/6-31G(2df,p) harmonic frequencies (cm<sup>-1</sup>) ==

|           |           |           |           |           |           |           |
|-----------|-----------|-----------|-----------|-----------|-----------|-----------|
| -742.1511 | 69.9140   | 83.0700   | 87.3003   | 159.9739  | 171.7284  | 224.4365  |
| 267.7812  | 302.7345  | 328.1931  | 386.0541  | 454.5238  | 539.0822  | 588.4296  |
| 636.9772  | 712.6765  | 762.2611  | 819.6963  | 834.9399  | 892.8861  | 913.4471  |
| 940.2107  | 960.1079  | 983.8261  | 988.7509  | 992.3932  | 1001.4077 | 1051.1970 |
| 1064.0201 | 1160.3884 | 1185.4595 | 1187.3328 | 1194.2974 | 1200.6950 | 1219.9378 |
| 1296.5075 | 1331.8437 | 1339.5367 | 1362.9748 | 1414.6790 | 1419.7785 | 1469.2885 |
| 1487.6904 | 1501.7921 | 1529.4322 | 1657.6348 | 2914.7441 | 3018.8485 | 3041.4979 |
| 3044.0465 | 3062.1204 | 3100.6556 | 3167.7854 | 3173.1021 | 3186.6868 | 3197.4801 |
| 3790.6901 | -742.1510 | 69.9140   | 83.0695   | 87.3001   | 159.9739  | 171.7290  |
| 224.4364  | 267.7813  | 302.7346  | 328.1931  | 386.0541  | 454.5239  | 539.0822  |
| 588.4295  | 636.9772  | 712.6765  | 762.2612  | 819.6963  | 834.9399  | 892.8861  |
| 913.4471  | 940.2107  | 960.1075  | 983.8261  | 988.7510  | 992.3934  | 1001.4077 |
| 1051.1970 | 1064.0199 | 1160.3883 | 1185.4596 | 1187.3330 | 1194.2975 | 1200.6949 |
| 1219.9378 | 1296.5074 | 1331.8438 | 1339.5367 | 1362.9750 | 1414.6790 | 1419.7787 |
| 1469.2884 | 1487.6902 | 1501.7921 | 1529.4325 | 1657.6349 | 2914.7441 | 3018.8485 |
| 3041.4979 | 3044.0465 | 3062.1203 | 3100.6556 | 3167.7854 | 3173.1021 | 3186.6868 |
| 3197.4801 | 3790.6902 |           |           |           |           |           |

== Thermochemistry energies (hartree) ==

|         |             |                                 |
|---------|-------------|---------------------------------|
| ZPVE =  | 0.168087    | (after scaling by 0.9854)       |
| G4 Ee = | -461.622168 | (total electronic energy)       |
| G4 U0 = | -461.454081 | (Zero-kelvin internal energy)   |
| G4 UT = | -461.443779 | (Internal energy at 298.15 K)   |
| G4 HT = | -461.442835 | (Enthalpy at 298.15 K)          |
| G4 GT = | -461.490658 | (Gibbs free energy at 298.15 K) |

[ CCSDT-F12a/cc-pVDZ-F12 data ]

CCSD(T)-F12a/cc-pVDZ-F12 Ee = -461.103871 (total electronic energy)

# Hydrocarbon 11: 6-methyl cyclohepta-2,4-dien-1-yl

Species 1: ·R

[ G4 data ]

== B3LYP/6-31G(2df,p) equilibrium geometry (Angstrom) ==

|   |           |           |           |
|---|-----------|-----------|-----------|
| C | 0.512415  | 1.302529  | 0.040143  |
| C | 1.135405  | -0.018096 | -0.332375 |
| C | -0.817001 | 1.591006  | 0.153299  |
| C | 0.491915  | -1.227737 | 0.387936  |
| C | 2.650745  | 0.010448  | -0.077071 |
| H | 0.981278  | -0.171025 | -1.412287 |
| C | -1.930491 | 0.735367  | -0.023962 |
| C | -0.918541 | -1.554277 | -0.009566 |
| C | -1.946735 | -0.671981 | -0.173547 |
| H | -1.145530 | -2.609745 | -0.135551 |
| H | 0.538845  | -1.047407 | 1.473218  |
| H | 1.119243  | -2.108573 | 0.207387  |
| H | -2.901146 | 1.223774  | -0.043740 |
| H | -2.919309 | -1.101601 | -0.405750 |
| H | 1.209687  | 2.123823  | 0.191154  |
| H | -1.064046 | 2.629449  | 0.366191  |
| H | 2.865300  | 0.125519  | 0.991681  |
| H | 3.122359  | 0.846220  | -0.603773 |
| H | 3.127045  | -0.913989 | -0.417675 |

== B3LYP/6-31G(2df,p) harmonic frequencies (cm<sup>-1</sup>) ==

|           |           |           |           |           |           |           |
|-----------|-----------|-----------|-----------|-----------|-----------|-----------|
| 91.8440   | 153.3643  | 232.8027  | 318.1169  | 344.8298  | 360.1684  | 401.0839  |
| 465.4948  | 560.4165  | 628.1912  | 679.3108  | 702.9897  | 814.8164  | 832.5759  |
| 870.0952  | 905.8087  | 919.6725  | 936.8072  | 974.1530  | 976.3934  | 1020.8867 |
| 1060.3150 | 1092.5492 | 1146.9605 | 1172.1164 | 1209.6121 | 1252.5518 | 1269.6478 |
| 1303.1025 | 1339.5687 | 1356.3553 | 1386.3555 | 1407.1426 | 1426.7360 | 1458.3784 |
| 1471.8817 | 1497.9161 | 1500.6405 | 1553.9398 | 1591.3935 | 2971.1213 | 2989.9046 |
| 3028.6295 | 3047.4735 | 3096.2932 | 3104.9922 | 3129.0563 | 3134.4263 | 3150.3475 |
| 3158.8528 | 3169.5100 |           |           |           |           |           |

== Thermochemistry energies (hartree) ==

|         |             |                                 |
|---------|-------------|---------------------------------|
| ZPVE =  | 0.163132    | (after scaling by 0.9854)       |
| G4 Ee = | -311.346275 | (total electronic energy)       |
| G4 U0 = | -311.183143 | (Zero-kelvin internal energy)   |
| G4 UT = | -311.175392 | (Internal energy at 298.15 K)   |
| G4 HT = | -311.174448 | (Enthalpy at 298.15 K)          |
| G4 GT = | -311.215555 | (Gibbs free energy at 298.15 K) |

[ CCSDT-F12a/cc-pVDZ-F12 data ]

CCSD(T)-F12a/cc-pVDZ-F12 Ee = -310.927196 (total electronic energy)



## Species 2: ROO·

[ G4 data ]

== B3LYP/6-31G(2df,p) equilibrium geometry (Angstrom) ==

|   |           |           |           |
|---|-----------|-----------|-----------|
| C | 1.708490  | 0.877040  | -0.263984 |
| C | 1.207494  | -0.540410 | -0.175807 |
| C | 0.957070  | 1.986757  | -0.220169 |
| C | 0.241194  | -0.720980 | 1.015057  |
| C | 2.374138  | -1.534549 | -0.084857 |
| H | 0.637783  | -0.758307 | -1.089383 |
| C | -0.493086 | 2.079605  | -0.111695 |
| C | -1.180443 | -0.206964 | 0.809299  |
| C | -1.399048 | 1.167786  | 0.275583  |
| H | -1.715102 | -0.302403 | 1.763452  |
| H | 0.653873  | -0.222429 | 1.900608  |
| H | 0.159299  | -1.785511 | 1.263635  |
| H | -0.894681 | 3.052829  | -0.389005 |
| H | -2.446969 | 1.457091  | 0.250279  |
| H | 2.783217  | 0.999600  | -0.383975 |
| H | 1.465158  | 2.942242  | -0.326943 |
| H | 2.944435  | -1.391910 | 0.840709  |
| H | 3.063968  | -1.405753 | -0.924876 |
| H | 2.013302  | -2.567198 | -0.101559 |
| O | -1.954464 | -1.194958 | 0.000365  |
| O | -1.690428 | -1.138537 | -1.283303 |

== B3LYP/6-31G(2df,p) harmonic frequencies (cm<sup>-1</sup>) ==

|           |           |           |           |           |           |           |
|-----------|-----------|-----------|-----------|-----------|-----------|-----------|
| 49.3148   | 93.1259   | 123.1098  | 199.8490  | 234.3772  | 288.2655  | 323.2734  |
| 343.4809  | 356.4657  | 411.5305  | 435.2568  | 526.1404  | 594.0429  | 707.0043  |
| 730.9390  | 748.9127  | 813.3359  | 832.1298  | 881.5001  | 906.6213  | 923.4299  |
| 955.3644  | 999.2854  | 1002.5735 | 1020.1897 | 1064.2155 | 1102.4300 | 1129.9398 |
| 1157.8425 | 1170.6454 | 1225.8105 | 1262.8834 | 1271.8029 | 1315.0391 | 1338.0899 |
| 1354.4466 | 1366.6228 | 1378.9628 | 1409.8959 | 1433.1626 | 1457.6199 | 1471.9373 |
| 1498.8436 | 1502.1519 | 1674.2306 | 1711.8745 | 3015.9812 | 3023.1831 | 3028.5439 |
| 3037.0288 | 3071.5977 | 3095.5782 | 3108.7851 | 3130.0635 | 3138.3977 | 3157.1399 |
| 3164.9632 |           |           |           |           |           |           |

== Thermochemistry energies (hartree) ==

|         |             |                                 |
|---------|-------------|---------------------------------|
| ZPVE =  | 0.172340    | (after scaling by 0.9854)       |
| G4 Ee = | -461.657017 | (total electronic energy)       |
| G4 U0 = | -461.484677 | (Zero-kelvin internal energy)   |
| G4 UT = | -461.474891 | (Internal energy at 298.15 K)   |
| G4 HT = | -461.473947 | (Enthalpy at 298.15 K)          |
| G4 GT = | -461.520515 | (Gibbs free energy at 298.15 K) |

[ CCSDT-F12a/cc-pVDZ-F12 data ]

CCSD(T)-F12a/cc-pVDZ-F12 Ee = -461.130782 (total electronic energy)

### Species 3: *syn*-QOOH

[ G4 data ]

== B3LYP/6-31G(2df,p) equilibrium geometry (Angstrom) ==

|   |           |           |           |
|---|-----------|-----------|-----------|
| C | -1.110654 | 1.307637  | 0.387107  |
| C | -1.418760 | 0.101076  | -0.182917 |
| C | 0.097152  | 2.038044  | 0.322373  |
| C | -0.508597 | -0.626843 | -1.143004 |
| C | -2.784877 | -0.503160 | -0.000826 |
| H | -0.095274 | -1.089948 | 1.626407  |
| C | 1.369404  | 1.635876  | -0.149105 |
| C | 0.970613  | -0.823217 | -0.765547 |
| C | 1.789573  | 0.419956  | -0.602784 |
| H | 1.415980  | -1.419838 | -1.574189 |
| H | -0.522075 | -0.096641 | -2.108290 |
| H | -0.921532 | -1.622219 | -1.341473 |
| H | 2.135101  | 2.407332  | -0.091229 |
| H | 2.844701  | 0.305812  | -0.834044 |
| H | -1.908644 | 1.789294  | 0.950159  |
| H | 0.054536  | 3.040923  | 0.738503  |
| H | -3.307375 | -0.596261 | -0.963456 |
| H | -3.411448 | 0.092672  | 0.667695  |
| H | -2.722156 | -1.522236 | 0.404748  |
| O | 1.128700  | -1.745543 | 0.332947  |
| O | 0.873182  | -1.077595 | 1.583727  |

== B3LYP/6-31G(2df,p) harmonic frequencies (cm<sup>-1</sup>) ==

|           |           |           |           |           |           |           |
|-----------|-----------|-----------|-----------|-----------|-----------|-----------|
| 74.9756   | 90.5431   | 131.3361  | 183.7959  | 223.6529  | 231.4063  | 290.7620  |
| 330.2508  | 336.2170  | 368.4284  | 438.7114  | 442.9195  | 531.1331  | 578.7490  |
| 679.1461  | 719.5723  | 777.3872  | 793.5949  | 865.9100  | 891.7973  | 904.8480  |
| 925.8345  | 934.4088  | 954.2276  | 984.3751  | 1004.9948 | 1041.1903 | 1051.1562 |
| 1084.5683 | 1178.0417 | 1207.9771 | 1237.4825 | 1266.9831 | 1329.6475 | 1343.6996 |
| 1370.0752 | 1385.5558 | 1404.9603 | 1412.0104 | 1425.1098 | 1448.7668 | 1461.5441 |
| 1475.3426 | 1490.5891 | 1553.4744 | 1603.1192 | 2985.6629 | 3001.5986 | 3013.1445 |
| 3040.9765 | 3058.5391 | 3111.3727 | 3130.1335 | 3136.0197 | 3163.7129 | 3172.4232 |
| 3717.6483 |           |           |           |           |           |           |

== Thermochemistry energies (hartree) ==

ZPVE = 0.170594 (after scaling by 0.9854)  
G4 Ee = -461.665418 (total electronic energy)  
G4 U0 = -461.494824 (Zero-kelvin internal energy)  
G4 UT = -461.484569 (Internal energy at 298.15 K)  
G4 HT = -461.483625 (Enthalpy at 298.15 K)  
G4 GT = -461.530656 (Gibbs free energy at 298.15 K)

[ CCSDT-F12a/cc-pVDZ-F12 data ]

CCSD(T)-F12a/cc-pVDZ-F12 Ee = (total electronic energy)

### Species 4: *anti*-QOOH

[ G4 data ]

== B3LYP/6-31G(2df,p) equilibrium geometry (Angstrom) ==

|   |           |           |           |
|---|-----------|-----------|-----------|
| C | 1.543073  | 0.946630  | -0.547668 |
| C | 1.548857  | -0.278007 | 0.063369  |
| C | 0.600376  | 1.993277  | -0.442915 |
| C | 0.532033  | -0.718512 | 1.090072  |
| C | 2.651445  | -1.259672 | -0.211124 |
| H | -2.594334 | -0.404356 | -1.389372 |
| C | -0.681666 | 1.988799  | 0.156347  |
| C | -0.945109 | -0.493157 | 0.734938  |
| C | -1.384151 | 0.944168  | 0.686403  |
| H | -1.561289 | -1.020455 | 1.474361  |
| H | 0.720915  | -0.200516 | 2.041026  |
| H | 0.667514  | -1.786568 | 1.288632  |
| H | -1.183679 | 2.954932  | 0.164299  |
| H | -2.373358 | 1.150186  | 1.083863  |
| H | 2.395181  | 1.161427  | -1.190156 |
| H | 0.891739  | 2.930408  | -0.909902 |
| H | 3.167570  | -1.550418 | 0.714408  |
| H | 3.394512  | -0.860191 | -0.905704 |
| H | 2.244042  | -2.185962 | -0.638307 |
| O | -1.106641 | -1.169357 | -0.525690 |
| O | -2.513106 | -1.196848 | -0.838020 |

== B3LYP/6-31G(2df,p) harmonic frequencies (cm<sup>-1</sup>) ==

|           |           |           |           |           |           |           |
|-----------|-----------|-----------|-----------|-----------|-----------|-----------|
| 58.1876   | 78.2458   | 130.5639  | 185.7571  | 229.8267  | 259.0019  | 288.1203  |
| 320.4274  | 350.7253  | 358.5258  | 428.8577  | 491.8206  | 497.5320  | 597.7132  |
| 681.8536  | 709.7280  | 774.9756  | 793.8980  | 836.9256  | 898.5175  | 920.4693  |
| 931.4435  | 940.9904  | 962.6367  | 981.7509  | 1011.9249 | 1043.4811 | 1059.3269 |
| 1077.6428 | 1181.1765 | 1205.8074 | 1237.4890 | 1270.2121 | 1321.6837 | 1357.0111 |
| 1379.6094 | 1384.7966 | 1392.6647 | 1407.3605 | 1430.2127 | 1446.6071 | 1461.8009 |
| 1475.1123 | 1489.5992 | 1552.6256 | 1601.6792 | 3003.8656 | 3008.9310 | 3022.2102 |
| 3047.7136 | 3070.9939 | 3113.2999 | 3129.8319 | 3135.1420 | 3162.9602 | 3173.3463 |
| 3733.6210 |           |           |           |           |           |           |

== Thermochemistry energies (hartree) ==

ZPVE = 0.170833 (after scaling by 0.9854)  
G4 Ee = -461.669337 (total electronic energy)  
G4 U0 = -461.498504 (Zero-kelvin internal energy)  
G4 UT = -461.488249 (Internal energy at 298.15 K)  
G4 HT = -461.487305 (Enthalpy at 298.15 K)  
G4 GT = -461.534676 (Gibbs free energy at 298.15 K)

[ CCSDT-F12a/cc-pVDZ-F12 data ]

CCSD(T)-F12a/cc-pVDZ-F12 Ee = (total electronic energy)

## Species 5: *cy*-ether

[ G4 data ]

== B3LYP/6-31G(2df,p) equilibrium geometry (Angstrom) ==

|   |           |           |           |
|---|-----------|-----------|-----------|
| C | 0.254391  | 1.447390  | 0.099525  |
| C | 0.998670  | 0.127291  | 0.034772  |
| C | -1.080147 | 1.574894  | 0.046069  |
| C | 0.497775  | -0.910143 | 1.075165  |
| C | 2.492232  | 0.315937  | -0.128609 |
| C | -2.064848 | 0.494860  | -0.031986 |
| C | -0.409493 | -1.394736 | -0.079541 |
| C | -1.804102 | -0.820814 | -0.069517 |
| H | -0.426441 | -2.470102 | -0.277773 |
| H | 0.022598  | -0.541885 | 1.984544  |
| H | 1.273356  | -1.639748 | 1.315006  |
| H | -3.104563 | 0.811409  | -0.049308 |
| H | -2.631570 | -1.523788 | -0.111349 |
| H | 0.863178  | 2.345477  | 0.167149  |
| H | -1.492592 | 2.580283  | 0.076774  |
| H | 2.904023  | 0.859341  | 0.729216  |
| H | 2.706804  | 0.896142  | -1.032676 |
| H | 2.994845  | -0.650766 | -0.209184 |
| O | 0.447936  | -0.709305 | -1.033458 |

== B3LYP/6-31G(2df,p) harmonic frequencies (cm<sup>-1</sup>) ==

|           |           |           |           |           |           |           |
|-----------|-----------|-----------|-----------|-----------|-----------|-----------|
| 186.6690  | 222.6001  | 247.3711  | 269.7890  | 357.5052  | 398.5863  | 404.4224  |
| 467.3151  | 604.2638  | 608.5854  | 661.2110  | 703.4256  | 790.3078  | 818.3028  |
| 850.3837  | 860.3076  | 879.5640  | 935.7217  | 947.3066  | 964.8246  | 986.1890  |
| 995.7775  | 1000.1947 | 1051.5341 | 1097.4551 | 1130.8993 | 1195.1352 | 1223.6774 |
| 1244.6348 | 1252.7998 | 1268.9040 | 1296.2931 | 1367.9437 | 1403.5366 | 1410.9391 |
| 1445.6298 | 1478.2401 | 1481.6368 | 1492.5191 | 1659.0401 | 1700.8897 | 3031.9640 |
| 3062.7139 | 3078.0764 | 3099.3418 | 3123.2860 | 3142.2498 | 3142.9397 | 3151.6999 |
| 3165.9125 | 3176.3414 |           |           |           |           |           |

== Thermochemistry energies (hartree) ==

ZPVE = 0.158349 (after scaling by 0.9854)  
G4 Ee = -385.945043 (total electronic energy)  
G4 U0 = -385.786694 (Zero-kelvin internal energy)  
G4 UT = -385.779127 (Internal energy at 298.15 K)  
G4 HT = -385.778183 (Enthalpy at 298.15 K)  
G4 GT = -385.818019 (Gibbs free energy at 298.15 K)

[ CCSDT-F12a/cc-pVDZ-F12 data ]

CCSD(T)-F12a/cc-pVDZ-F12 Ee = -385.476576 (total electronic energy)

Species 6: Transition state along  $\text{ROO} \cdot \xrightarrow{\text{TS1}} \cdot\text{QOOH}$

[ G4 data ]

== B3LYP/6-31G(2df,p) equilibrium geometry (Angstrom) ==

|   |           |           |           |
|---|-----------|-----------|-----------|
| C | 0.885447  | 1.499009  | -0.258769 |
| C | 1.247302  | 0.130358  | 0.077382  |
| C | -0.361729 | 2.040901  | -0.256192 |
| C | 0.429475  | -0.540012 | 1.177794  |
| C | 2.736055  | -0.181286 | 0.108056  |
| H | 0.712175  | -0.514346 | -0.913792 |
| C | -1.636345 | 1.409121  | 0.013483  |
| C | -0.970506 | -0.960240 | 0.699369  |
| C | -1.927962 | 0.147689  | 0.389164  |
| H | -1.419289 | -1.624273 | 1.446351  |
| H | 0.318216  | 0.124367  | 2.043877  |
| H | 0.948004  | -1.442535 | 1.514792  |
| H | -2.490855 | 2.062609  | -0.152075 |
| H | -2.976770 | -0.126287 | 0.462539  |
| H | 1.696078  | 2.137142  | -0.605924 |
| H | -0.434342 | 3.083466  | -0.554959 |
| H | 3.201171  | 0.196154  | 1.029015  |
| H | 3.255990  | 0.277020  | -0.738381 |
| H | 2.913024  | -1.260186 | 0.070351  |
| O | -0.782841 | -1.857827 | -0.424684 |
| O | -0.233888 | -1.165469 | -1.488255 |

== B3LYP/6-31G(2df,p) harmonic frequencies (cm<sup>-1</sup>) ==

|            |           |           |           |           |           |           |
|------------|-----------|-----------|-----------|-----------|-----------|-----------|
| -1799.7666 | 117.1355  | 182.5540  | 200.3899  | 220.8473  | 263.4234  | 335.6080  |
| 352.0580   | 374.6077  | 446.2885  | 458.5190  | 495.2187  | 574.3015  | 615.1169  |
| 711.3243   | 742.0033  | 782.0428  | 830.5689  | 864.2878  | 894.0936  | 912.9296  |
| 932.8964   | 972.8134  | 979.9059  | 988.8614  | 1006.6879 | 1014.6068 | 1058.3592 |
| 1089.6635  | 1142.2873 | 1187.1598 | 1210.1235 | 1238.4083 | 1280.9870 | 1297.0676 |
| 1327.4977  | 1339.2339 | 1373.7882 | 1408.5090 | 1437.3026 | 1460.9380 | 1475.8539 |
| 1490.9035  | 1493.9527 | 1545.9988 | 1572.0285 | 1672.1179 | 3012.8564 | 3026.5235 |
| 3054.9258  | 3081.8803 | 3085.1049 | 3112.3099 | 3133.0317 | 3139.8386 | 3162.6844 |
| 3171.0030  |           |           |           |           |           |           |

== Thermochemistry energies (hartree) ==

ZPVE = 0.166912 (after scaling by 0.9854)  
G4 Ee = -461.625030 (total electronic energy)  
G4 U0 = -461.458118 (Zero-kelvin internal energy)  
G4 UT = -461.449184 (Internal energy at 298.15 K)  
G4 HT = -461.448240 (Enthalpy at 298.15 K)  
G4 GT = -461.491983 (Gibbs free energy at 298.15 K)

[ CCSDT-F12a/cc-pVDZ-F12 data ]

CCSD(T)-F12a/cc-pVDZ-F12 Ee = -461.100700 (total electronic energy)

Species 7: Transition state along  $\cdot\text{QOOH} \xrightarrow{\text{TS4}} \text{cycloether} + \cdot\text{OH}$

[ G4 data ]

== B3LYP/6-31G(2df,p) equilibrium geometry (Angstrom) ==

|   |           |           |           |
|---|-----------|-----------|-----------|
| C | 1.032014  | 1.242808  | -0.671060 |
| C | 1.299438  | 0.056788  | 0.085961  |
| C | -0.119905 | 1.977776  | -0.659875 |
| C | 0.617556  | -0.154451 | 1.434743  |
| C | 2.576066  | -0.681321 | -0.175809 |
| H | -1.686145 | -1.477811 | -1.741012 |
| C | -1.369005 | 1.667407  | -0.004765 |
| C | -0.730693 | -0.617074 | 0.879254  |
| C | -1.681397 | 0.531794  | 0.656981  |
| H | -1.215826 | -1.420250 | 1.436799  |
| H | 0.586161  | 0.742882  | 2.059622  |
| H | 1.111817  | -0.960345 | 1.980415  |
| H | -2.144709 | 2.422659  | -0.103941 |
| H | -2.679028 | 0.431735  | 1.074579  |
| H | 1.814642  | 1.556215  | -1.358485 |
| H | -0.126066 | 2.878989  | -1.268059 |
| H | 3.378172  | -0.289520 | 0.467204  |
| H | 2.898497  | -0.580326 | -1.215565 |
| H | 2.456101  | -1.742153 | 0.055691  |
| O | -0.182168 | -1.136583 | -0.344830 |
| O | -1.585090 | -2.076472 | -0.987648 |

== B3LYP/6-31G(2df,p) harmonic frequencies (cm<sup>-1</sup>) ==

|           |           |           |           |           |           |           |
|-----------|-----------|-----------|-----------|-----------|-----------|-----------|
| -769.1943 | 79.1032   | 134.7191  | 151.8649  | 174.9322  | 212.5560  | 240.6062  |
| 254.2048  | 318.9178  | 337.2621  | 388.7913  | 416.4727  | 471.9577  | 530.7640  |
| 613.3856  | 669.2552  | 725.6582  | 807.7962  | 830.5067  | 849.8375  | 874.1486  |
| 897.4268  | 944.7867  | 961.0711  | 981.0939  | 989.7974  | 1009.0278 | 1013.1968 |
| 1032.0336 | 1065.2919 | 1142.3599 | 1206.5088 | 1221.5997 | 1255.5083 | 1269.2413 |
| 1302.5334 | 1319.4909 | 1370.9531 | 1396.6922 | 1426.1032 | 1465.2165 | 1469.4725 |
| 1490.4705 | 1492.1476 | 1529.2794 | 1652.4365 | 3005.1776 | 3053.4677 | 3088.3493 |
| 3088.7563 | 3116.6127 | 3130.4539 | 3139.4705 | 3148.8258 | 3165.2096 | 3177.8741 |
| 3787.5126 | -769.1938 | 79.1033   | 134.7194  | 151.8653  | 174.9324  | 212.5572  |
| 240.6063  | 254.2049  | 318.9178  | 337.2621  | 388.7913  | 416.4727  | 471.9578  |
| 530.7639  | 613.3856  | 669.2552  | 725.6582  | 807.7963  | 830.5067  | 849.8375  |
| 874.1486  | 897.4269  | 944.7867  | 961.0713  | 981.0938  | 989.7972  | 1009.0278 |
| 1013.1968 | 1032.0337 | 1065.2920 | 1142.3598 | 1206.5089 | 1221.5996 | 1255.5082 |
| 1269.2412 | 1302.5334 | 1319.4909 | 1370.9530 | 1396.6922 | 1426.1029 | 1465.2166 |
| 1469.4725 | 1490.4705 | 1492.1476 | 1529.2793 | 1652.4364 | 3005.1776 | 3053.4677 |
| 3088.3493 | 3088.7563 | 3116.6127 | 3130.4539 | 3139.4705 | 3148.8258 | 3165.2096 |
| 3177.8741 | 3787.5127 |           |           |           |           |           |

== Thermochemistry energies (hartree) ==

|         |             |                                 |
|---------|-------------|---------------------------------|
| ZPVE =  | 0.168117    | (after scaling by 0.9854)       |
| G4 Ee = | -461.619793 | (total electronic energy)       |
| G4 U0 = | -461.451676 | (Zero-kelvin internal energy)   |
| G4 UT = | -461.441524 | (Internal energy at 298.15 K)   |
| G4 HT = | -461.440580 | (Enthalpy at 298.15 K)          |
| G4 GT = | -461.487148 | (Gibbs free energy at 298.15 K) |

[ CCSDT-F12a/cc-pVDZ-F12 data ]

CCSD(T)-F12a/cc-pVDZ-F12 Ee = -461.100430 (total electronic energy)

# Hydrocarbon 12: (cyclohepta-3,5-dien-1-yl)methyl

## Species 1: ·R

[ G4 data ]

== B3LYP/6-31G(2df,p) equilibrium geometry (Angstrom) ==

|   |           |           |           |
|---|-----------|-----------|-----------|
| C | 1.875801  | 0.729747  | -0.107002 |
| C | 1.876173  | -0.729090 | -0.178029 |
| C | 0.873973  | -1.590750 | 0.044287  |
| C | 0.862596  | 1.586672  | 0.088124  |
| C | -0.554304 | -1.270732 | 0.387935  |
| C | -0.606499 | 1.315453  | 0.240044  |
| H | 2.863986  | 1.173913  | -0.209749 |
| H | 1.123110  | 2.642333  | 0.143755  |
| H | 2.846681  | -1.160786 | -0.413805 |
| H | 1.106488  | -2.650906 | -0.029725 |
| C | -1.151926 | -0.019267 | -0.300413 |
| H | -1.147999 | 2.126091  | -0.266749 |
| H | -0.886425 | 1.416156  | 1.300148  |
| H | -0.665152 | -1.166040 | 1.477354  |
| H | -1.172046 | -2.135742 | 0.119063  |
| C | -2.643498 | -0.036100 | -0.216241 |
| H | -0.856246 | -0.081306 | -1.363587 |
| H | -3.213750 | 0.885612  | -0.181992 |
| H | -3.192546 | -0.964917 | -0.326947 |

== B3LYP/6-31G(2df,p) harmonic frequencies (cm<sup>-1</sup>) ==

|           |           |           |           |           |           |           |
|-----------|-----------|-----------|-----------|-----------|-----------|-----------|
| 28.7242   | 91.1085   | 139.0890  | 319.4834  | 333.2116  | 362.7480  | 386.6746  |
| 403.0089  | 499.0002  | 524.4212  | 616.0944  | 691.3160  | 779.2795  | 841.7136  |
| 846.2413  | 883.8226  | 892.4954  | 908.9078  | 995.3713  | 999.8804  | 1014.3846 |
| 1016.5221 | 1065.6570 | 1108.5491 | 1152.7092 | 1175.7952 | 1227.2240 | 1272.4258 |
| 1283.6847 | 1296.5870 | 1340.6698 | 1351.7492 | 1400.4143 | 1422.8784 | 1459.7025 |
| 1461.6463 | 1465.9605 | 1474.4326 | 1687.4366 | 1716.4649 | 2923.8378 | 2989.7031 |
| 3003.4396 | 3024.0139 | 3047.8657 | 3123.9138 | 3133.7286 | 3142.3578 | 3148.5058 |
| 3161.0255 | 3245.5452 |           |           |           |           |           |

== Thermochemistry energies (hartree) ==

|         |             |                                 |
|---------|-------------|---------------------------------|
| ZPVE =  | 0.161367    | (after scaling by 0.9854)       |
| G4 Ee = | -311.309416 | (total electronic energy)       |
| G4 U0 = | -311.148049 | (Zero-kelvin internal energy)   |
| G4 UT = | -311.139644 | (Internal energy at 298.15 K)   |
| G4 HT = | -311.138699 | (Enthalpy at 298.15 K)          |
| G4 GT = | -311.182244 | (Gibbs free energy at 298.15 K) |

[ CCSDT-F12a/cc-pVDZ-F12 data ]

CCSD(T)-F12a/cc-pVDZ-F12 Ee = -310.889434 (total electronic energy)



## Species 2: ROO·

[ G4 data ]

== B3LYP/6-31G(2df,p) equilibrium geometry (Angstrom) ==

|   |           |           |           |
|---|-----------|-----------|-----------|
| C | 2.667263  | -0.521979 | -0.227361 |
| C | 2.528895  | 0.912129  | 0.010342  |
| C | 1.413994  | 1.652808  | 0.072808  |
| C | 1.733610  | -1.482396 | -0.295458 |
| C | -0.007384 | 1.175467  | -0.047449 |
| C | 0.248276  | -1.399040 | -0.090036 |
| H | 3.693852  | -0.843255 | -0.391681 |
| H | 2.084037  | -2.486512 | -0.527334 |
| H | 3.474414  | 1.440290  | 0.112139  |
| H | 1.533504  | 2.722940  | 0.224147  |
| C | -0.301733 | -0.169418 | 0.651512  |
| H | -0.058187 | -2.297728 | 0.464508  |
| H | -0.256239 | -1.489823 | -1.062932 |
| H | -0.290851 | 1.104883  | -1.106560 |
| H | -0.668246 | 1.942194  | 0.370201  |
| C | -1.800638 | -0.345470 | 0.917195  |
| H | 0.161663  | -0.134887 | 1.646864  |
| O | -2.562103 | -0.466117 | -0.319578 |
| H | -2.224552 | 0.495499  | 1.469973  |
| H | -2.000727 | -1.282857 | 1.445639  |
| O | -2.980694 | 0.703198  | -0.754707 |

== B3LYP/6-31G(2df,p) harmonic frequencies (cm<sup>-1</sup>) ==

|           |           |           |           |           |           |           |
|-----------|-----------|-----------|-----------|-----------|-----------|-----------|
| 30.1657   | 50.0080   | 92.9063   | 108.4701  | 227.9616  | 299.9988  | 336.4239  |
| 361.4965  | 381.2015  | 492.4883  | 523.8423  | 566.7288  | 640.7689  | 689.1578  |
| 780.4974  | 839.8420  | 848.8987  | 864.0819  | 900.7833  | 902.9394  | 912.4439  |
| 994.2156  | 1006.4573 | 1012.4153 | 1018.0511 | 1062.8406 | 1094.0208 | 1141.7416 |
| 1179.4776 | 1191.4427 | 1252.1344 | 1271.8094 | 1285.4301 | 1287.8945 | 1308.5159 |
| 1353.3397 | 1366.7286 | 1377.8499 | 1415.1571 | 1422.3435 | 1461.3166 | 1463.0643 |
| 1469.8746 | 1479.4731 | 1687.5799 | 1716.8118 | 3000.0279 | 3012.0041 | 3018.2423 |
| 3032.4493 | 3057.8706 | 3066.7709 | 3125.5454 | 3127.3107 | 3138.4551 | 3152.4224 |
| 3164.7577 |           |           |           |           |           |           |

== Thermochemistry energies (hartree) ==

|         |             |                                 |
|---------|-------------|---------------------------------|
| ZPVE =  | 0.173008    | (after scaling by 0.9854)       |
| G4 Ee = | -461.653283 | (total electronic energy)       |
| G4 U0 = | -461.480275 | (Zero-kelvin internal energy)   |
| G4 UT = | -461.470473 | (Internal energy at 298.15 K)   |
| G4 HT = | -461.469529 | (Enthalpy at 298.15 K)          |
| G4 GT = | -461.517526 | (Gibbs free energy at 298.15 K) |

[ CCSDT-F12a/cc-pVDZ-F12 data ]

CCSD(T)-F12a/cc-pVDZ-F12 Ee = -461.127390 (total electronic energy)

### Species 3: *syn*-QOOH

[ G4 data ]

== B3LYP/6-31G(2df,p) equilibrium geometry (Angstrom) ==

|   |           |           |           |
|---|-----------|-----------|-----------|
| C | 2.696769  | -0.408432 | -0.235345 |
| C | 2.436383  | 0.980243  | -0.157779 |
| C | 1.217487  | 1.634666  | 0.137801  |
| C | 1.799864  | -1.435552 | -0.250922 |
| C | 0.022372  | 1.108684  | 0.541887  |
| C | 0.303783  | -1.323176 | -0.256486 |
| H | 3.746473  | -0.679996 | -0.327475 |
| H | 2.198948  | -2.443153 | -0.332202 |
| H | 3.290721  | 1.632036  | -0.319047 |
| H | 1.261494  | 2.721399  | 0.094123  |
| C | -0.323071 | -0.341895 | 0.763028  |
| H | -0.123420 | -2.316710 | -0.077676 |
| H | -0.039547 | -1.039849 | -1.261549 |
| H | -1.857866 | 1.055624  | -1.336040 |
| H | -0.763722 | 1.814464  | 0.794110  |
| C | -1.847893 | -0.558898 | 0.821540  |
| H | 0.044054  | -0.625144 | 1.764101  |
| O | -2.503386 | -0.484281 | -0.438372 |
| H | -2.319997 | 0.140551  | 1.522090  |
| H | -2.063967 | -1.582306 | 1.151065  |
| O | -2.647530 | 0.907937  | -0.793356 |

== B3LYP/6-31G(2df,p) harmonic frequencies (cm<sup>-1</sup>) ==

|           |           |           |           |           |           |           |
|-----------|-----------|-----------|-----------|-----------|-----------|-----------|
| 56.0196   | 72.5339   | 136.5875  | 166.8107  | 220.0721  | 283.0328  | 303.8168  |
| 351.6393  | 391.4513  | 419.1430  | 466.6051  | 545.6163  | 602.7872  | 667.7561  |
| 684.6490  | 707.8231  | 821.2156  | 839.4585  | 871.6006  | 887.6158  | 921.1417  |
| 928.4223  | 941.4498  | 975.4831  | 984.7203  | 1016.7370 | 1027.9599 | 1081.7228 |
| 1136.9867 | 1169.7578 | 1200.9142 | 1244.1727 | 1267.2512 | 1271.1639 | 1288.4316 |
| 1349.2103 | 1361.5289 | 1387.7489 | 1389.9275 | 1399.0236 | 1428.1527 | 1454.4704 |
| 1465.8434 | 1475.0254 | 1554.0723 | 1593.2194 | 2959.4772 | 3008.5230 | 3026.0726 |
| 3052.4749 | 3078.5299 | 3132.8405 | 3137.7983 | 3159.9871 | 3167.0343 | 3173.7023 |
| 3725.2076 |           |           |           |           |           |           |

== Thermochemistry energies (hartree) ==

ZPVE = 0.171584 (after scaling by 0.9854)  
G4 Ee = -461.660743 (total electronic energy)  
G4 U0 = -461.489159 (Zero-kelvin internal energy)  
G4 UT = -461.479250 (Internal energy at 298.15 K)  
G4 HT = -461.478306 (Enthalpy at 298.15 K)  
G4 GT = -461.525221 (Gibbs free energy at 298.15 K)

[ CCSDT-F12a/cc-pVDZ-F12 data ]

CCSD(T)-F12a/cc-pVDZ-F12 Ee = (total electronic energy)

## Species 4: *anti*-QOOH

[ G4 data ]

== B3LYP/6-31G(2df,p) equilibrium geometry (Angstrom) ==

|   |           |           |           |
|---|-----------|-----------|-----------|
| C | 2.794539  | -0.611914 | -0.082283 |
| C | 2.704116  | 0.796888  | -0.187527 |
| C | 1.547259  | 1.612605  | -0.161076 |
| C | 1.787777  | -1.534070 | -0.088253 |
| C | 0.270492  | 1.271129  | 0.175568  |
| C | 0.316445  | -1.261120 | -0.204751 |
| H | 3.807643  | -1.007108 | -0.040128 |
| H | 2.074163  | -2.581575 | -0.044018 |
| H | 3.646709  | 1.320573  | -0.322823 |
| H | 1.713654  | 2.659307  | -0.408064 |
| C | -0.197455 | -0.078806 | 0.654952  |
| H | -0.232963 | -2.164999 | 0.085392  |
| H | 0.048378  | -1.073077 | -1.253361 |
| H | -3.963670 | -0.703598 | -0.764094 |
| H | -0.487228 | 2.048156  | 0.130880  |
| C | -1.723210 | -0.109029 | 0.789570  |
| H | 0.185008  | -0.235096 | 1.675838  |
| O | -2.261578 | 0.057149  | -0.514227 |
| H | -2.069879 | 0.706180  | 1.437943  |
| H | -2.059531 | -1.063023 | 1.220630  |
| O | -3.696180 | 0.140371  | -0.372696 |

== B3LYP/6-31G(2df,p) harmonic frequencies (cm<sup>-1</sup>) ==

|           |           |           |           |           |           |           |
|-----------|-----------|-----------|-----------|-----------|-----------|-----------|
| 66.0164   | 74.3254   | 118.6484  | 153.2231  | 186.5413  | 210.3040  | 314.7851  |
| 332.2777  | 375.8766  | 398.7737  | 434.3478  | 542.1514  | 578.5145  | 669.5969  |
| 686.4520  | 700.8542  | 815.6379  | 859.2156  | 872.4285  | 910.6582  | 918.2522  |
| 937.9348  | 970.8069  | 973.3251  | 977.1268  | 1018.9938 | 1050.3719 | 1090.9446 |
| 1138.9869 | 1170.7972 | 1197.4300 | 1242.7394 | 1249.4604 | 1270.7139 | 1286.6847 |
| 1336.6419 | 1355.6188 | 1384.1767 | 1388.2179 | 1396.9137 | 1427.2558 | 1459.0145 |
| 1472.8257 | 1520.2440 | 1554.7490 | 1591.7746 | 2977.8412 | 2997.9763 | 3013.4962 |
| 3042.6003 | 3049.0301 | 3133.1085 | 3138.0884 | 3158.4377 | 3166.0596 | 3173.1639 |
| 3750.1315 |           |           |           |           |           |           |

== Thermochemistry energies (hartree) ==

ZPVE = 0.171247 (after scaling by 0.9854)  
G4 Ee = -461.661980 (total electronic energy)  
G4 U0 = -461.490733 (Zero-kelvin internal energy)  
G4 UT = -461.480567 (Internal energy at 298.15 K)  
G4 HT = -461.479622 (Enthalpy at 298.15 K)  
G4 GT = -461.527164 (Gibbs free energy at 298.15 K)

[ CCSDT-F12a/cc-pVDZ-F12 data ]

CCSD(T)-F12a/cc-pVDZ-F12 Ee = (total electronic energy)

## Species 5: *cy*-ether

[ G4 data ]

== B3LYP/6-31G(2df,p) equilibrium geometry (Angstrom) ==

|   |           |           |           |
|---|-----------|-----------|-----------|
| C | 2.264833  | -0.048953 | 0.145088  |
| C | 1.645547  | 1.231727  | -0.194128 |
| C | 0.348220  | 1.560584  | -0.108942 |
| C | 1.672806  | -1.247579 | 0.046126  |
| C | -0.759633 | 0.763197  | 0.500161  |
| C | 0.258920  | -1.432798 | -0.431975 |
| H | 3.309366  | -0.006075 | 0.446408  |
| H | 2.241673  | -2.136934 | 0.303060  |
| H | 2.331354  | 1.998983  | -0.550257 |
| H | 0.037376  | 2.554804  | -0.424882 |
| C | -0.776628 | -0.785234 | 0.492047  |
| H | 0.028059  | -2.496959 | -0.548992 |
| H | 0.151423  | -0.968931 | -1.423477 |
| H | -0.955920 | 1.164889  | 1.509259  |
| C | -2.182383 | -0.610036 | -0.118152 |
| H | -0.747093 | -1.240968 | 1.484164  |
| O | -1.980791 | 0.810750  | -0.282894 |
| H | -3.015262 | -0.829515 | 0.563244  |
| H | -2.364743 | -1.110732 | -1.076729 |

== B3LYP/6-31G(2df,p) harmonic frequencies (cm<sup>-1</sup>) ==

|           |           |           |           |           |           |           |
|-----------|-----------|-----------|-----------|-----------|-----------|-----------|
| 77.6135   | 169.1296  | 268.7964  | 297.0359  | 346.2259  | 389.4649  | 417.4599  |
| 554.3108  | 650.9460  | 690.3408  | 767.3989  | 794.8608  | 845.0916  | 852.2199  |
| 880.6813  | 925.3455  | 967.9620  | 987.3340  | 997.8654  | 1007.0218 | 1017.3741 |
| 1036.7746 | 1059.6683 | 1087.4942 | 1141.7884 | 1164.6953 | 1203.3390 | 1231.3724 |
| 1251.3595 | 1264.5255 | 1287.1884 | 1331.4461 | 1344.9600 | 1372.6058 | 1380.5307 |
| 1410.3233 | 1449.5104 | 1479.4590 | 1523.9728 | 1674.9750 | 1706.3246 | 2945.2088 |
| 3001.6637 | 3006.0903 | 3051.0550 | 3065.2569 | 3085.9470 | 3126.7213 | 3142.5603 |
| 3153.9085 | 3169.7487 |           |           |           |           |           |

== Thermochemistry energies (hartree) ==

ZPVE = 0.159512 (after scaling by 0.9854)  
G4 Ee = -385.939673 (total electronic energy)  
G4 U0 = -385.780161 (Zero-kelvin internal energy)  
G4 UT = -385.772688 (Internal energy at 298.15 K)  
G4 HT = -385.771744 (Enthalpy at 298.15 K)  
G4 GT = -385.812165 (Gibbs free energy at 298.15 K)

[ CCSDT-F12a/cc-pVDZ-F12 data ]

CCSD(T)-F12a/cc-pVDZ-F12 Ee = -385.471793 (total electronic energy)

Species 6: Transition state along  $\text{ROO} \cdot \xrightarrow{\text{TS1}} \cdot\text{QOOH}$

[ G4 data ]

== B3LYP/6-31G(2df,p) equilibrium geometry (Angstrom) ==

|   |           |           |           |
|---|-----------|-----------|-----------|
| C | 2.640334  | -0.347062 | -0.179853 |
| C | 2.273397  | 1.048485  | -0.169906 |
| C | 1.079465  | 1.618380  | 0.152722  |
| C | 1.814546  | -1.409986 | -0.200530 |
| C | -0.167965 | 1.018229  | 0.573171  |
| C | 0.319006  | -1.361364 | -0.287664 |
| H | 3.710264  | -0.542862 | -0.191561 |
| H | 2.265438  | -2.399074 | -0.198953 |
| H | 3.083181  | 1.738303  | -0.396357 |
| H | 1.054134  | 2.706623  | 0.135154  |
| C | -0.396851 | -0.476171 | 0.757097  |
| H | -0.075439 | -2.379548 | -0.202189 |
| H | 0.019080  | -1.009399 | -1.284149 |
| H | -1.103416 | 1.256636  | -0.299490 |
| H | -0.647327 | 1.603804  | 1.366268  |
| C | -1.924566 | -0.728964 | 0.661491  |
| H | -0.087427 | -0.779250 | 1.767781  |
| O | -2.372691 | -0.346156 | -0.630334 |
| H | -2.467687 | -0.160217 | 1.425933  |
| H | -2.159384 | -1.794051 | 0.750447  |
| O | -2.304262 | 1.044874  | -0.708672 |

== B3LYP/6-31G(2df,p) harmonic frequencies (cm<sup>-1</sup>) ==

|            |           |           |           |           |           |           |
|------------|-----------|-----------|-----------|-----------|-----------|-----------|
| -1777.7798 | 92.5416   | 112.4239  | 180.8338  | 255.0585  | 308.7429  | 373.5250  |
| 378.7523   | 423.3234  | 460.4827  | 532.8264  | 566.6355  | 618.6219  | 664.7977  |
| 711.2419   | 782.9526  | 864.3216  | 876.4786  | 898.1026  | 902.8342  | 923.9394  |
| 925.9531   | 972.5665  | 994.2839  | 1005.4336 | 1035.2894 | 1043.8233 | 1057.5013 |
| 1108.9995  | 1152.0080 | 1209.4320 | 1221.8278 | 1261.6642 | 1271.5562 | 1274.9846 |
| 1303.4135  | 1348.9321 | 1355.0543 | 1360.9701 | 1398.3323 | 1427.2155 | 1470.5606 |
| 1474.8564  | 1480.4632 | 1563.9631 | 1582.9806 | 1674.3442 | 2999.8378 | 3022.0793 |
| 3029.6826  | 3052.9263 | 3065.7101 | 3099.5487 | 3132.6391 | 3141.6528 | 3157.2051 |
| 3168.4063  |           |           |           |           |           |           |

== Thermochemistry energies (hartree) ==

ZPVE = 0.167862 (after scaling by 0.9854)  
G4 Ee = -461.618381 (total electronic energy)  
G4 U0 = -461.450519 (Zero-kelvin internal energy)  
G4 UT = -461.441847 (Internal energy at 298.15 K)  
G4 HT = -461.440903 (Enthalpy at 298.15 K)  
G4 GT = -461.484697 (Gibbs free energy at 298.15 K)

[ CCSDT-F12a/cc-pVDZ-F12 data ]

CCSD(T)-F12a/cc-pVDZ-F12 Ee = -461.094321 (total electronic energy)

Species 7: Transition state along  $\cdot\text{QOOH} \xrightarrow{\text{TS4}} \text{cycloether} + \cdot\text{OH}$

[ G4 data ]

== B3LYP/6-31G(2df,p) equilibrium geometry (Angstrom) ==

|   |           |           |           |
|---|-----------|-----------|-----------|
| C | 2.706329  | -0.015049 | -0.379728 |
| C | 2.082689  | 1.281450  | -0.273876 |
| C | 0.859954  | 1.613718  | 0.246483  |
| C | 2.094979  | -1.214625 | -0.346757 |
| C | -0.108059 | 0.768226  | 0.847539  |
| C | 0.611444  | -1.429303 | -0.286604 |
| H | 3.783821  | 0.000667  | -0.526713 |
| H | 2.714750  | -2.102448 | -0.442007 |
| H | 2.705919  | 2.116854  | -0.585331 |
| H | 0.631217  | 2.676039  | 0.296299  |
| C | -0.157824 | -0.746579 | 0.859851  |
| H | 0.397085  | -2.501861 | -0.241575 |
| H | 0.167704  | -1.063277 | -1.223294 |
| H | -3.152971 | 0.766592  | -1.629754 |
| H | -0.686913 | 1.234658  | 1.640169  |
| C | -1.661150 | -0.806321 | 0.569311  |
| H | 0.133649  | -1.169818 | 1.828766  |
| O | -1.726212 | 0.413264  | -0.180861 |
| H | -2.273877 | -0.742824 | 1.479018  |
| H | -1.999641 | -1.654677 | -0.031625 |
| O | -3.397651 | 0.303110  | -0.816797 |

== B3LYP/6-31G(2df,p) harmonic frequencies (cm<sup>-1</sup>) ==

|           |           |           |           |           |           |           |
|-----------|-----------|-----------|-----------|-----------|-----------|-----------|
| -791.1789 | 68.9482   | 110.2074  | 137.5544  | 146.9086  | 212.2328  | 249.0939  |
| 294.6842  | 318.2839  | 381.8510  | 400.7981  | 429.6186  | 550.3089  | 658.4272  |
| 675.1339  | 712.8220  | 788.4377  | 867.8829  | 877.8298  | 887.1214  | 894.1168  |
| 919.1679  | 932.4988  | 968.1165  | 988.0600  | 1001.4483 | 1012.6292 | 1051.7263 |
| 1054.8860 | 1122.4725 | 1166.9594 | 1182.4252 | 1229.9159 | 1241.4543 | 1268.1032 |
| 1274.2059 | 1325.5291 | 1352.8491 | 1363.8737 | 1418.0893 | 1429.2705 | 1476.0853 |
| 1482.1795 | 1520.2053 | 1539.5907 | 1664.9557 | 3005.0876 | 3013.5466 | 3028.6606 |
| 3073.4676 | 3088.1572 | 3136.1575 | 3144.1490 | 3154.8060 | 3163.4655 | 3170.7481 |
| 3789.2615 | -791.1792 | 68.9482   | 110.2073  | 137.5541  | 146.9077  | 212.2328  |
| 249.0939  | 294.6842  | 318.2838  | 381.8510  | 400.7981  | 429.6186  | 550.3089  |
| 658.4272  | 675.1339  | 712.8220  | 788.4377  | 867.8829  | 877.8298  | 887.1215  |
| 894.1167  | 919.1679  | 932.4988  | 968.1165  | 988.0599  | 1001.4484 | 1012.6292 |
| 1051.7263 | 1054.8860 | 1122.4724 | 1166.9594 | 1182.4252 | 1229.9159 | 1241.4544 |
| 1268.1032 | 1274.2059 | 1325.5290 | 1352.8490 | 1363.8737 | 1418.0893 | 1429.2705 |
| 1476.0853 | 1482.1794 | 1520.2053 | 1539.5907 | 1664.9558 | 3005.0876 | 3013.5466 |
| 3028.6607 | 3073.4676 | 3088.1572 | 3136.1575 | 3144.1490 | 3154.8061 | 3163.4655 |
| 3170.7481 | 3789.2613 |           |           |           |           |           |

== Thermochemistry energies (hartree) ==

|         |             |                                 |
|---------|-------------|---------------------------------|
| ZPVE =  | 0.169303    | (after scaling by 0.9854)       |
| G4 Ee = | -461.607085 | (total electronic energy)       |
| G4 U0 = | -461.437782 | (Zero-kelvin internal energy)   |
| G4 UT = | -461.427886 | (Internal energy at 298.15 K)   |
| G4 HT = | -461.426942 | (Enthalpy at 298.15 K)          |
| G4 GT = | -461.473567 | (Gibbs free energy at 298.15 K) |

[ CCSDT-F12a/cc-pVDZ-F12 data ]

CCSD(T)-F12a/cc-pVDZ-F12 Ee = -461.087905 (total electronic energy)

# Hydrocarbon 13: cyclohepta-2,4-dien-1-yl

## Species 1: ·R

[ G4 data ]

== B3LYP/6-31G(2df,p) equilibrium geometry (Angstrom) ==

|   |           |           |           |
|---|-----------|-----------|-----------|
| C | 1.042696  | 1.269091  | -0.148830 |
| C | 1.653895  | 0.000456  | -0.000002 |
| C | 1.043398  | -1.268516 | 0.148844  |
| C | -0.273388 | 1.604966  | -0.013387 |
| C | -0.272496 | -1.605114 | 0.013411  |
| C | -1.401061 | 0.684312  | 0.355290  |
| C | -1.400655 | -0.685088 | -0.355319 |
| H | -2.351880 | 1.185802  | 0.141613  |
| H | -1.392714 | 0.513119  | 1.442400  |
| H | -1.392344 | -0.513884 | -1.442427 |
| H | 1.728480  | 2.088021  | -0.357691 |
| H | -0.533252 | 2.653340  | -0.135362 |
| H | -0.531789 | -2.653625 | 0.135419  |
| H | 2.740736  | 0.000756  | -0.000016 |
| H | 1.729636  | -2.087062 | 0.357716  |
| H | -2.351207 | -1.187106 | -0.141693 |

== B3LYP/6-31G(2df,p) harmonic frequencies (cm<sup>-1</sup>) ==

|           |           |           |           |           |           |           |
|-----------|-----------|-----------|-----------|-----------|-----------|-----------|
| 132.7281  | 186.7183  | 367.1961  | 387.1254  | 427.9678  | 544.2563  | 609.5425  |
| 693.2855  | 706.1469  | 786.5981  | 819.6430  | 885.3514  | 917.1846  | 922.0122  |
| 944.8603  | 977.9057  | 982.8147  | 1023.2068 | 1079.7937 | 1167.2458 | 1179.9185 |
| 1251.7818 | 1253.2055 | 1283.9270 | 1341.9585 | 1373.5074 | 1386.5998 | 1430.7680 |
| 1457.1891 | 1472.8694 | 1475.3308 | 1555.1935 | 1593.4018 | 2988.6437 | 2998.5678 |
| 3049.6644 | 3056.0971 | 3130.9155 | 3135.3242 | 3156.0548 | 3161.0792 | 3170.1810 |

== Thermochemistry energies (hartree) ==

|         |             |                                 |
|---------|-------------|---------------------------------|
| ZPVE =  | 0.135735    | (after scaling by 0.9854)       |
| G4 Ee = | -272.036967 | (total electronic energy)       |
| G4 U0 = | -271.901232 | (Zero-kelvin internal energy)   |
| G4 UT = | -271.894911 | (Internal energy at 298.15 K)   |
| G4 HT = | -271.893967 | (Enthalpy at 298.15 K)          |
| G4 GT = | -271.931779 | (Gibbs free energy at 298.15 K) |

[ CCSDT-F12a/cc-pVDZ-F12 data ]

CCSD(T)-F12a/cc-pVDZ-F12 Ee = -271.671764 (total electronic energy)



## Species 2: ROO·

[ G4 data ]

== B3LYP/6-31G(2df,p) equilibrium geometry (Angstrom) ==

|   |           |           |           |
|---|-----------|-----------|-----------|
| C | 2.317828  | 0.296143  | -0.146332 |
| C | 1.427771  | 1.448021  | -0.068308 |
| C | 0.109147  | 1.527080  | 0.176992  |
| C | 1.985886  | -0.999924 | -0.242416 |
| C | -0.850990 | 0.439119  | 0.528668  |
| C | 0.590335  | -1.552867 | -0.242459 |
| C | -0.316200 | -0.950024 | 0.843328  |
| H | 0.632662  | -2.638068 | -0.108602 |
| H | 0.121964  | -1.388252 | -1.223776 |
| H | 0.219028  | -0.904905 | 1.798405  |
| H | 3.375384  | 0.546542  | -0.178004 |
| H | 2.794065  | -1.721256 | -0.335701 |
| H | 1.927944  | 2.398915  | -0.244171 |
| H | -0.344965 | 2.514423  | 0.146674  |
| H | -1.191619 | -1.589903 | 0.993585  |
| O | -1.791040 | 0.341130  | -0.627572 |
| H | -1.487498 | 0.769450  | 1.356825  |
| O | -2.912663 | -0.245159 | -0.285188 |

== B3LYP/6-31G(2df,p) harmonic frequencies (cm<sup>-1</sup>) ==

|           |           |           |           |           |           |           |
|-----------|-----------|-----------|-----------|-----------|-----------|-----------|
| 57.9898   | 88.2378   | 193.7853  | 223.9278  | 305.3590  | 333.2879  | 390.9519  |
| 473.1443  | 500.7880  | 555.2133  | 647.2763  | 713.9106  | 780.6695  | 798.0159  |
| 856.6297  | 884.2066  | 899.5009  | 920.7043  | 968.9940  | 1004.2707 | 1026.6963 |
| 1040.9794 | 1072.6629 | 1129.0362 | 1196.4241 | 1201.8009 | 1241.7040 | 1272.0770 |
| 1284.7793 | 1314.3788 | 1362.3653 | 1378.6586 | 1390.0483 | 1431.3569 | 1460.9766 |
| 1475.8266 | 1477.4075 | 1673.5847 | 1712.2241 | 3010.8543 | 3041.7799 | 3055.0145 |
| 3074.9693 | 3090.9117 | 3132.0457 | 3146.3680 | 3161.0358 | 3169.6131 |           |

== Thermochemistry energies (hartree) ==

|         |             |                                 |
|---------|-------------|---------------------------------|
| ZPVE =  | 0.145071    | (after scaling by 0.9854)       |
| G4 Ee = | -422.350400 | (total electronic energy)       |
| G4 U0 = | -422.205329 | (Zero-kelvin internal energy)   |
| G4 UT = | -422.197005 | (Internal energy at 298.15 K)   |
| G4 HT = | -422.196060 | (Enthalpy at 298.15 K)          |
| G4 GT = | -422.239455 | (Gibbs free energy at 298.15 K) |

[ CCSDT-F12a/cc-pVDZ-F12 data ]

CCSD(T)-F12a/cc-pVDZ-F12 Ee = -421.878114 (total electronic energy)

### Species 3: *syn*-QOOH

[ G4 data ]

== B3LYP/6-31G(2df,p) equilibrium geometry (Angstrom) ==

|   |           |           |           |
|---|-----------|-----------|-----------|
| C | -2.156306 | -0.061840 | -0.483917 |
| C | -1.596651 | -1.290677 | -0.060844 |
| C | -0.343833 | -1.562424 | 0.408176  |
| C | -1.601464 | 1.237408  | -0.411474 |
| C | 0.788867  | -0.589497 | 0.569793  |
| C | -0.476065 | 1.641369  | 0.243770  |
| C | 0.414269  | 0.799782  | 1.109970  |
| H | -0.225134 | 2.697947  | 0.192191  |
| H | 2.466292  | 0.977600  | -1.096128 |
| H | -0.056047 | 0.649605  | 2.094068  |
| H | -3.139336 | -0.130357 | -0.941673 |
| H | -2.168854 | 2.012129  | -0.923158 |
| H | -2.257588 | -2.149504 | -0.162891 |
| H | -0.100279 | -2.597644 | 0.625373  |
| H | 1.345691  | 1.339846  | 1.304015  |
| O | 1.394680  | -0.526874 | -0.732014 |
| H | 1.527769  | -1.022089 | 1.257751  |
| O | 2.659643  | 0.174091  | -0.593285 |

== B3LYP/6-31G(2df,p) harmonic frequencies (cm<sup>-1</sup>) ==

|           |           |           |           |           |           |           |
|-----------|-----------|-----------|-----------|-----------|-----------|-----------|
| 50.7715   | 108.3919  | 172.4829  | 253.3618  | 264.9418  | 295.2542  | 359.2985  |
| 412.2076  | 489.9113  | 508.4343  | 556.2937  | 650.2132  | 716.9638  | 778.3398  |
| 804.1635  | 840.5795  | 889.4572  | 915.1233  | 918.1203  | 926.2588  | 953.2711  |
| 982.8668  | 989.8004  | 1031.5633 | 1108.2067 | 1177.1526 | 1221.9555 | 1253.1981 |
| 1259.0746 | 1336.1233 | 1342.6270 | 1376.6749 | 1389.2242 | 1392.3586 | 1435.6565 |
| 1459.9291 | 1466.6938 | 1556.7124 | 1597.9897 | 2991.7546 | 3012.2895 | 3077.8164 |
| 3134.4342 | 3138.6491 | 3157.9566 | 3169.5101 | 3178.7800 | 3759.5742 |           |

== Thermochemistry energies (hartree) ==

|         |             |                                 |
|---------|-------------|---------------------------------|
| ZPVE =  | 0.143365    | (after scaling by 0.9854)       |
| G4 Ee = | -422.355992 | (total electronic energy)       |
| G4 U0 = | -422.212627 | (Zero-kelvin internal energy)   |
| G4 UT = | -422.203894 | (Internal energy at 298.15 K)   |
| G4 HT = | -422.202949 | (Enthalpy at 298.15 K)          |
| G4 GT = | -422.246964 | (Gibbs free energy at 298.15 K) |

[ CCSDT-F12a/cc-pVDZ-F12 data ]

CCSD(T)-F12a/cc-pVDZ-F12 Ee = (total electronic energy)

## Species 4: *anti*-QOOH

[ G4 data ]

== B3LYP/6-31G(2df,p) equilibrium geometry (Angstrom) ==

|   |           |           |           |
|---|-----------|-----------|-----------|
| C | 1.780255  | 1.054181  | -0.396931 |
| C | 0.736741  | 1.662370  | 0.341009  |
| C | -0.402417 | 1.106634  | 0.850643  |
| C | 1.986687  | -0.317331 | -0.672247 |
| C | -0.862698 | -0.317785 | 0.689090  |
| C | 1.320515  | -1.395626 | -0.168543 |
| C | 0.221952  | -1.391909 | 0.855704  |
| H | 1.647524  | -2.378211 | -0.497208 |
| H | -2.212184 | 1.012880  | -1.239313 |
| H | 0.649934  | -1.269154 | 1.861728  |
| H | 2.521761  | 1.734684  | -0.806707 |
| H | 2.805911  | -0.534102 | -1.354509 |
| H | 0.855609  | 2.732942  | 0.500167  |
| H | -1.084000 | 1.761743  | 1.384933  |
| H | -0.273018 | -2.368408 | 0.852323  |
| O | -1.409480 | -0.572440 | -0.617027 |
| H | -1.654433 | -0.512488 | 1.423577  |
| O | -2.583433 | 0.249554  | -0.772640 |

== B3LYP/6-31G(2df,p) harmonic frequencies (cm<sup>-1</sup>) ==

|           |           |           |           |           |           |           |
|-----------|-----------|-----------|-----------|-----------|-----------|-----------|
| 65.3358   | 121.3593  | 136.8639  | 252.6857  | 284.1509  | 294.4647  | 363.8387  |
| 415.5229  | 486.9140  | 489.8235  | 579.9225  | 666.1295  | 721.3217  | 784.5427  |
| 787.5008  | 834.7067  | 895.9073  | 920.3552  | 928.5761  | 936.3046  | 961.2052  |
| 981.5156  | 985.7884  | 1038.2251 | 1092.8266 | 1175.7087 | 1234.9287 | 1255.4086 |
| 1261.3503 | 1325.9360 | 1359.7914 | 1379.8793 | 1390.6972 | 1400.0732 | 1435.5472 |
| 1455.6023 | 1461.9022 | 1555.5235 | 1595.7252 | 2999.2977 | 3023.1721 | 3070.4839 |
| 3131.0812 | 3140.0836 | 3162.4283 | 3169.5177 | 3174.9995 | 3737.1293 |           |

== Thermochemistry energies (hartree) ==

|         |             |                                 |
|---------|-------------|---------------------------------|
| ZPVE =  | 0.143499    | (after scaling by 0.9854)       |
| G4 Ee = | -422.356111 | (total electronic energy)       |
| G4 U0 = | -422.212612 | (Zero-kelvin internal energy)   |
| G4 UT = | -422.203914 | (Internal energy at 298.15 K)   |
| G4 HT = | -422.202969 | (Enthalpy at 298.15 K)          |
| G4 GT = | -422.246771 | (Gibbs free energy at 298.15 K) |

[ CCSDT-F12a/cc-pVDZ-F12 data ]

CCSD(T)-F12a/cc-pVDZ-F12 Ee = (total electronic energy)

## Species 5: *cy*-ether

[ G4 data ]

== B3LYP/6-31G(2df,p) equilibrium geometry (Angstrom) ==

|   |           |           |           |
|---|-----------|-----------|-----------|
| C | -0.000434 | 1.618794  | -0.732543 |
| C | -0.000434 | 1.618794  | 0.732543  |
| C | -0.000434 | 0.543178  | 1.534916  |
| C | -0.000434 | 0.543178  | -1.534916 |
| C | -0.051198 | -0.879694 | 1.032900  |
| C | -0.051198 | -0.879694 | -1.032900 |
| C | 1.043972  | -1.241847 | -0.000000 |
| H | -0.213746 | -1.583825 | -1.853665 |
| H | 1.967113  | -0.662179 | -0.000000 |
| H | 0.016354  | 2.600869  | -1.198153 |
| H | 0.019814  | 0.687506  | -2.611635 |
| H | 0.016354  | 2.600869  | 1.198153  |
| H | 0.019814  | 0.687506  | 2.611635  |
| H | 1.258687  | -2.311176 | -0.000000 |
| O | -1.063711 | -1.046501 | -0.000000 |
| H | -0.213746 | -1.583825 | 1.853665  |

== B3LYP/6-31G(2df,p) harmonic frequencies (cm<sup>-1</sup>) ==

|           |           |           |           |           |           |           |
|-----------|-----------|-----------|-----------|-----------|-----------|-----------|
| 239.4443  | 241.0836  | 339.4879  | 428.7224  | 464.1666  | 600.8683  | 609.1468  |
| 702.8870  | 789.9060  | 801.6697  | 836.1659  | 856.3050  | 893.2081  | 914.8917  |
| 947.0965  | 965.9556  | 988.8864  | 999.3855  | 1016.2797 | 1059.4884 | 1097.9188 |
| 1126.8692 | 1213.3538 | 1242.6039 | 1242.6087 | 1254.7886 | 1302.7779 | 1355.9585 |
| 1375.0172 | 1408.4563 | 1443.9377 | 1481.0947 | 1660.3061 | 1700.8733 | 3065.2927 |
| 3065.6637 | 3085.4559 | 3144.9763 | 3148.3960 | 3154.5821 | 3169.5360 | 3178.1894 |

== Thermochemistry energies (hartree) ==

|         |             |                                 |
|---------|-------------|---------------------------------|
| ZPVE =  | 0.131582    | (after scaling by 0.9854)       |
| G4 Ee = | -346.628462 | (total electronic energy)       |
| G4 U0 = | -346.496880 | (Zero-kelvin internal energy)   |
| G4 UT = | -346.490848 | (Internal energy at 298.15 K)   |
| G4 HT = | -346.489904 | (Enthalpy at 298.15 K)          |
| G4 GT = | -346.526589 | (Gibbs free energy at 298.15 K) |

[ CCSDT-F12a/cc-pVDZ-F12 data ]

CCSD(T)-F12a/cc-pVDZ-F12 Ee = -346.213771 (total electronic energy)

Species 6: Transition state along  $\text{ROO} \cdot \xrightarrow{\text{TS1}} \cdot\text{QOOH}$

[ G4 data ]

== B3LYP/6-31G(2df,p) equilibrium geometry (Angstrom) ==

|   |           |           |           |
|---|-----------|-----------|-----------|
| C | -1.730260 | 0.777959  | -0.447062 |
| C | -1.890919 | -0.631152 | -0.143700 |
| C | -0.944022 | -1.510806 | 0.236129  |
| C | -0.702728 | 1.635422  | -0.158350 |
| C | 0.498223  | -1.120724 | 0.394160  |
| C | 0.521949  | 1.379792  | 0.558183  |
| C | 0.683037  | 0.093003  | 1.340032  |
| H | 0.968362  | 2.257674  | 1.027886  |
| H | 1.410963  | 1.066365  | -0.346017 |
| H | -0.047266 | 0.009723  | 2.152326  |
| H | -2.574275 | 1.217369  | -0.973625 |
| H | -0.815064 | 2.650666  | -0.533426 |
| H | -2.899606 | -1.012891 | -0.284607 |
| H | -1.214598 | -2.544989 | 0.419773  |
| H | 1.679914  | 0.070487  | 1.785619  |
| O | 0.941219  | -0.765848 | -0.951189 |
| H | 1.102176  | -1.963994 | 0.747207  |
| O | 2.030995  | 0.079425  | -0.882746 |

== B3LYP/6-31G(2df,p) harmonic frequencies (cm<sup>-1</sup>) ==

|            |           |           |           |           |           |           |
|------------|-----------|-----------|-----------|-----------|-----------|-----------|
| -1931.8921 | 147.2113  | 232.9771  | 263.8448  | 322.1225  | 400.0806  | 453.0794  |
| 466.1199   | 516.1865  | 597.6468  | 633.7694  | 696.6870  | 761.9086  | 784.7653  |
| 797.4457   | 871.7181  | 898.4616  | 920.8123  | 942.0807  | 969.0960  | 987.1202  |
| 995.7602   | 1003.2110 | 1043.6869 | 1079.5207 | 1116.6350 | 1181.5894 | 1230.4023 |
| 1239.3681  | 1261.4373 | 1292.8543 | 1333.1986 | 1365.2003 | 1396.6956 | 1428.8375 |
| 1465.9399  | 1483.6934 | 1534.7770 | 1588.3311 | 1656.1419 | 3038.6310 | 3047.8135 |
| 3100.9029  | 3112.1934 | 3138.1594 | 3149.3172 | 3164.0788 | 3188.3296 |           |

== Thermochemistry energies (hartree) ==

ZPVE = 0.139857 (after scaling by 0.9854)  
 G4 Ee = -422.309109 (total electronic energy)  
 G4 U0 = -422.169252 (Zero-kelvin internal energy)  
 G4 UT = -422.162024 (Internal energy at 298.15 K)  
 G4 HT = -422.161080 (Enthalpy at 298.15 K)  
 G4 GT = -422.201166 (Gibbs free energy at 298.15 K)

[ CCSDT-F12a/cc-pVDZ-F12 data ]

CCSD(T)-F12a/cc-pVDZ-F12 Ee = -421.838741 (total electronic energy)

Species 7: Transition state along  $\cdot\text{QOOH} \xrightarrow{\text{TS4}} \text{cycloether} + \cdot\text{OH}$

[ G4 data ]

== B3LYP/6-31G(2df,p) equilibrium geometry (Angstrom) ==

|   |           |           |           |
|---|-----------|-----------|-----------|
| C | 1.805312  | 0.690380  | -0.589546 |
| C | 1.013440  | 1.571000  | 0.237743  |
| C | -0.147172 | 1.282000  | 0.867891  |
| C | 1.597720  | -0.640200 | -0.831175 |
| C | -0.816195 | -0.070162 | 0.871089  |
| C | 0.619018  | -1.456834 | -0.192009 |
| C | 0.152654  | -1.196381 | 1.233433  |
| H | 0.495700  | -2.461234 | -0.583903 |
| H | -1.950454 | 0.886041  | -1.638758 |
| H | 0.956871  | -0.924734 | 1.922882  |
| H | 2.621905  | 1.166075  | -1.126860 |
| H | 2.187412  | -1.106412 | -1.616114 |
| H | 1.383870  | 2.590159  | 0.315790  |
| H | -0.638188 | 2.069233  | 1.432564  |
| H | -0.384695 | -2.064275 | 1.617782  |
| O | -1.065623 | -0.576938 | -0.456565 |
| H | -1.749051 | -0.043631 | 1.436417  |
| O | -2.468380 | 0.428182  | -0.961479 |

== B3LYP/6-31G(2df,p) harmonic frequencies (cm<sup>-1</sup>) ==

|           |           |           |           |           |           |           |
|-----------|-----------|-----------|-----------|-----------|-----------|-----------|
| -817.3588 | 81.3859   | 150.0101  | 206.1836  | 229.8385  | 284.1591  | 299.1852  |
| 338.0047  | 417.4434  | 480.2473  | 532.5622  | 594.2334  | 718.7306  | 781.7556  |
| 795.9857  | 821.8607  | 860.9180  | 893.3850  | 905.8440  | 932.5248  | 955.4480  |
| 970.9057  | 993.3655  | 1006.9731 | 1040.5998 | 1062.1609 | 1139.9305 | 1173.2637 |
| 1227.2468 | 1241.2086 | 1263.7162 | 1292.3824 | 1369.9771 | 1384.9999 | 1422.2114 |
| 1465.4987 | 1483.7249 | 1527.3581 | 1647.8170 | 3058.9928 | 3094.8701 | 3125.5216 |
| 3144.3493 | 3153.1048 | 3167.5247 | 3177.5382 | 3184.2415 | 3785.8632 | -817.3581 |
| 81.3861   | 150.0103  | 206.1846  | 229.8387  | 284.1592  | 299.1852  | 338.0047  |
| 417.4434  | 480.2474  | 532.5621  | 594.2334  | 718.7306  | 781.7556  | 795.9857  |
| 821.8607  | 860.9181  | 893.3850  | 905.8441  | 932.5248  | 955.4480  | 970.9058  |
| 993.3654  | 1006.9733 | 1040.5997 | 1062.1609 | 1139.9304 | 1173.2635 | 1227.2467 |
| 1241.2087 | 1263.7162 | 1292.3822 | 1369.9770 | 1384.9998 | 1422.2114 | 1465.4987 |
| 1483.7247 | 1527.3580 | 1647.8170 | 3058.9929 | 3094.8701 | 3125.5216 | 3144.3493 |
| 3153.1048 | 3167.5247 | 3177.5382 | 3184.2415 | 3785.8633 |           |           |

== Thermochemistry energies (hartree) ==

ZPVE = 0.141171 (after scaling by 0.9854)  
G4 Ee = -422.303350 (total electronic energy)  
G4 U0 = -422.162179 (Zero-kelvin internal energy)  
G4 UT = -422.153717 (Internal energy at 298.15 K)  
G4 HT = -422.152773 (Enthalpy at 298.15 K)  
G4 GT = -422.195710 (Gibbs free energy at 298.15 K)

[ CCSDT-F12a/cc-pVDZ-F12 data ]

CCSD(T)-F12a/cc-pVDZ-F12 Ee = -421.837660 (total electronic energy)

# Hydrocarbon 14: cyclohepta-3,5-dien-1-yl

## Species 1: ·R

[ G4 data ]

== B3LYP/6-31G(2df,p) equilibrium geometry (Angstrom) ==

|   |           |           |           |
|---|-----------|-----------|-----------|
| C | -0.242846 | 1.581923  | 0.060190  |
| C | 1.131135  | 1.166811  | -0.211383 |
| C | 1.662010  | -0.054372 | -0.056038 |
| C | -1.365594 | 0.850307  | 0.151869  |
| C | 0.883441  | -1.258164 | 0.438159  |
| C | -1.577444 | -0.628599 | -0.073704 |
| C | -0.368926 | -1.452562 | -0.360000 |
| H | -2.311114 | -0.747954 | -0.883676 |
| H | -2.103311 | -1.013111 | 0.822484  |
| H | -0.318513 | -2.024642 | -1.279798 |
| H | -0.360720 | 2.655014  | 0.202980  |
| H | -2.283174 | 1.386650  | 0.390934  |
| H | 1.517352  | -2.149620 | 0.395654  |
| H | 0.626308  | -1.100086 | 1.496956  |
| H | 1.792546  | 1.966925  | -0.537409 |
| H | 2.709973  | -0.205238 | -0.302681 |

== B3LYP/6-31G(2df,p) harmonic frequencies (cm<sup>-1</sup>) ==

|           |           |           |           |           |           |           |
|-----------|-----------|-----------|-----------|-----------|-----------|-----------|
| 83.2259   | 173.3971  | 317.9713  | 328.2929  | 386.0391  | 414.3911  | 525.0893  |
| 633.8837  | 706.2276  | 786.4719  | 833.0060  | 865.9941  | 888.3785  | 897.8879  |
| 913.1925  | 993.1610  | 1012.6961 | 1032.3932 | 1040.7217 | 1144.4590 | 1181.0954 |
| 1237.4500 | 1247.8702 | 1265.5906 | 1305.3438 | 1347.4047 | 1372.7251 | 1413.2218 |
| 1446.0881 | 1451.2958 | 1466.9822 | 1669.5135 | 1702.7456 | 2901.7761 | 2986.9655 |
| 3016.1954 | 3067.9149 | 3118.7163 | 3135.2767 | 3146.3721 | 3164.6792 | 3186.8296 |

== Thermochemistry energies (hartree) ==

|         |             |                                 |
|---------|-------------|---------------------------------|
| ZPVE =  | 0.134265    | (after scaling by 0.9854)       |
| G4 Ee = | -272.005688 | (total electronic energy)       |
| G4 U0 = | -271.871423 | (Zero-kelvin internal energy)   |
| G4 UT = | -271.864628 | (Internal energy at 298.15 K)   |
| G4 HT = | -271.863684 | (Enthalpy at 298.15 K)          |
| G4 GT = | -271.902604 | (Gibbs free energy at 298.15 K) |

[ CCSDT-F12a/cc-pVDZ-F12 data ]

CCSD(T)-F12a/cc-pVDZ-F12 Ee = -271.639493 (total electronic energy)

## Species 2: ROO·

[ G4 data ]

== B3LYP/6-31G(2df,p) equilibrium geometry (Angstrom) ==

|   |           |           |           |
|---|-----------|-----------|-----------|
| C | 1.689079  | 1.063771  | -0.432989 |
| C | 1.938523  | -0.359297 | -0.631934 |
| C | 1.308718  | -1.416055 | -0.101934 |
| C | 0.695167  | 1.684826  | 0.217967  |
| C | 0.153235  | -1.414875 | 0.862915  |
| C | -0.493420 | 1.115004  | 0.937345  |
| C | -0.901314 | -0.327495 | 0.659072  |
| H | -1.370644 | 1.732468  | 0.708649  |
| H | -0.347730 | 1.215869  | 2.022730  |
| H | 2.434197  | 1.709812  | -0.892176 |
| H | 0.728614  | 2.772224  | 0.239252  |
| H | -0.351054 | -2.385726 | 0.808067  |
| H | 0.520380  | -1.329649 | 1.895272  |
| H | 2.768744  | -0.575796 | -1.300367 |
| H | 1.665020  | -2.403515 | -0.383089 |
| O | -1.354000 | -0.467111 | -0.733278 |
| O | -2.471960 | 0.185072  | -0.945724 |
| H | -1.779776 | -0.554651 | 1.271023  |

== B3LYP/6-31G(2df,p) harmonic frequencies (cm<sup>-1</sup>) ==

|           |           |           |           |           |           |           |
|-----------|-----------|-----------|-----------|-----------|-----------|-----------|
| 36.7061   | 77.3544   | 135.2147  | 259.7143  | 314.3393  | 331.5842  | 382.2453  |
| 457.6518  | 510.2698  | 531.7394  | 657.9832  | 765.9274  | 770.9577  | 790.1159  |
| 879.2396  | 893.7442  | 902.3649  | 910.3816  | 935.9637  | 1003.2783 | 1019.3767 |
| 1034.0270 | 1072.8308 | 1103.4764 | 1213.2006 | 1233.4693 | 1256.2208 | 1258.5720 |
| 1282.5414 | 1339.8446 | 1353.8439 | 1385.6503 | 1403.7514 | 1432.8102 | 1453.0239 |
| 1463.5788 | 1466.6223 | 1691.3604 | 1719.8163 | 3006.4206 | 3016.9395 | 3054.7655 |
| 3060.5547 | 3069.4992 | 3131.9695 | 3143.2275 | 3157.4882 | 3169.3269 |           |

== Thermochemistry energies (hartree) ==

ZPVE = 0.144888 (after scaling by 0.9854)  
G4 Ee = -422.348939 (total electronic energy)  
G4 U0 = -422.204051 (Zero-kelvin internal energy)  
G4 UT = -422.195612 (Internal energy at 298.15 K)  
G4 HT = -422.194667 (Enthalpy at 298.15 K)  
G4 GT = -422.238765 (Gibbs free energy at 298.15 K)

[ CCSDT-F12a/cc-pVDZ-F12 data ]

CCSD(T)-F12a/cc-pVDZ-F12 Ee = -421.876559 (total electronic energy)



### Species 3: ·QOOH

[ G4 data ]

== B3LYP/6-31G(2df,p) equilibrium geometry (Angstrom) ==

|   |           |           |           |
|---|-----------|-----------|-----------|
| C | 1.780171  | 1.054270  | -0.397003 |
| C | 1.986731  | -0.317239 | -0.672259 |
| C | 1.320663  | -1.395579 | -0.168512 |
| C | 0.736676  | 1.662371  | 0.341023  |
| C | 0.222002  | -1.391951 | 0.855650  |
| C | -0.402396 | 1.106550  | 0.850749  |
| C | -0.862601 | -0.317850 | 0.689114  |
| H | -2.212333 | 1.013198  | -1.238636 |
| H | -1.083904 | 1.761593  | 1.385219  |
| H | 2.521594  | 1.734836  | -0.806827 |
| H | 0.855489  | 2.732945  | 0.500220  |
| H | -0.272971 | -2.368448 | 0.852096  |
| H | 0.649926  | -1.269376 | 1.861723  |
| H | 2.805996  | -0.533968 | -1.354488 |
| H | 1.647835  | -2.378146 | -0.497070 |
| O | -1.409522 | -0.572409 | -0.617198 |
| O | -2.583567 | 0.249479  | -0.772592 |
| H | -1.654398 | -0.512625 | 1.423512  |

== B3LYP/6-31G(2df,p) harmonic frequencies (cm<sup>-1</sup>) ==

|           |           |           |           |           |           |           |
|-----------|-----------|-----------|-----------|-----------|-----------|-----------|
| 65.5825   | 121.4266  | 137.0510  | 252.3990  | 283.6866  | 294.5073  | 363.8361  |
| 415.5501  | 486.9120  | 489.8644  | 579.9980  | 666.0708  | 721.3904  | 784.4459  |
| 787.5640  | 834.7492  | 895.9548  | 920.4408  | 928.5571  | 936.2927  | 961.1220  |
| 981.4871  | 985.7805  | 1037.9294 | 1092.9302 | 1175.6905 | 1234.9368 | 1255.3916 |
| 1261.3723 | 1326.0210 | 1359.8396 | 1379.8923 | 1391.0158 | 1400.0738 | 1435.5622 |
| 1455.6351 | 1461.8736 | 1555.4927 | 1595.7248 | 2999.3878 | 3023.3587 | 3070.5469 |
| 3131.0482 | 3140.0269 | 3162.3982 | 3169.4618 | 3174.9650 | 3736.7877 |           |

== Thermochemistry energies (hartree) ==

ZPVE = 0.143499 (after scaling by 0.9854)  
G4 Ee = -422.356110 (total electronic energy)  
G4 U0 = -422.212611 (Zero-kelvin internal energy)  
G4 UT = -422.203912 (Internal energy at 298.15 K)  
G4 HT = -422.202968 (Enthalpy at 298.15 K)  
G4 GT = -422.246766 (Gibbs free energy at 298.15 K)

[ CCSDT-F12a/cc-pVDZ-F12 data ]

CCSD(T)-F12a/cc-pVDZ-F12 Ee = -421.884728 (total electronic energy)

Species 4: Transition state along  $\text{ROO} \cdot \xrightarrow{\text{TS1}} \cdot\text{QOOH}$

[ G4 data ]

== B3LYP/6-31G(2df,p) equilibrium geometry (Angstrom) ==

|   |           |           |           |
|---|-----------|-----------|-----------|
| C | 1.859740  | 1.170556  | -0.181296 |
| C | 0.683074  | 1.689367  | 0.270229  |
| C | -0.535878 | 0.957034  | 0.484546  |
| C | 2.254187  | -0.219373 | -0.357031 |
| C | -0.687754 | -0.430197 | -0.137713 |
| C | 1.608153  | -1.365312 | -0.053631 |
| C | 0.192588  | -1.527017 | 0.438738  |
| H | 2.672364  | 1.878081  | -0.329371 |
| H | 0.678340  | 2.742796  | 0.544296  |
| H | -1.676719 | 1.247667  | -0.134800 |
| H | 3.272379  | -0.335464 | -0.721637 |
| H | -0.487242 | -0.343787 | -1.213694 |
| H | 2.158770  | -2.290882 | -0.198938 |
| H | 0.156459  | -1.525458 | 1.536802  |
| H | -0.190910 | -2.503719 | 0.120546  |
| H | -0.960255 | 1.039163  | 1.492662  |
| O | -2.649124 | 0.482553  | -0.522316 |
| O | -2.084356 | -0.677396 | 0.037450  |

== B3LYP/6-31G(2df,p) harmonic frequencies (cm<sup>-1</sup>) ==

|            |           |           |           |           |           |           |
|------------|-----------|-----------|-----------|-----------|-----------|-----------|
| -2197.7970 | 120.0196  | 163.0088  | 247.0915  | 303.2991  | 353.8540  | 379.2505  |
| 447.8785   | 481.1673  | 556.6430  | 628.0892  | 662.8909  | 712.5251  | 791.0412  |
| 853.4560   | 865.9284  | 882.9208  | 912.9446  | 942.9691  | 972.5635  | 989.6921  |
| 1008.8423  | 1042.9101 | 1046.9499 | 1104.8668 | 1147.3607 | 1197.9879 | 1215.7261 |
| 1254.4394  | 1271.8126 | 1316.3378 | 1330.1959 | 1390.0093 | 1411.2665 | 1430.6227 |
| 1467.4397  | 1473.0223 | 1545.5907 | 1656.8953 | 1759.0545 | 3011.9894 | 3022.3226 |
| 3054.6478  | 3060.2523 | 3134.6503 | 3143.0499 | 3159.2967 | 3170.3930 |           |

== Thermochemistry energies (hartree) ==

ZPVE = 0.139398 (after scaling by 0.9854)  
G4 Ee = -422.292698 (total electronic energy)  
G4 U0 = -422.153300 (Zero-kelvin internal energy)  
G4 UT = -422.145681 (Internal energy at 298.15 K)  
G4 HT = -422.144737 (Enthalpy at 298.15 K)  
G4 GT = -422.185964 (Gibbs free energy at 298.15 K)

[ CCSDT-F12a/cc-pVDZ-F12 data ]

CCSD(T)-F12a/cc-pVDZ-F12 Ee = -421.822843 (total electronic energy)

# Hydrocarbon 15: (cyclohexa-2,4-dien-1-yl)methyl (5-membered path)

Species 1: ·R

[ G4 data ]

== B3LYP/6-31G(2df,p) equilibrium geometry (Angstrom) ==

|   |           |           |           |
|---|-----------|-----------|-----------|
| C | -0.221774 | -1.250254 | -0.162115 |
| C | 1.268477  | -1.145672 | 0.049582  |
| C | 1.873379  | 0.048597  | 0.040476  |
| C | 1.092788  | 1.273692  | -0.134164 |
| C | -0.240273 | 1.265607  | -0.009737 |
| C | -0.986892 | -0.014894 | 0.362643  |
| H | -0.623667 | -2.153053 | 0.308075  |
| H | -0.417508 | -1.359349 | -1.242647 |
| H | 1.842592  | -2.062701 | 0.142282  |
| H | 2.951292  | 0.129319  | 0.142142  |
| H | 1.619848  | 2.199527  | -0.346171 |
| H | -0.821223 | 2.177184  | -0.109398 |
| C | -2.406907 | -0.011735 | -0.102340 |
| H | -0.985362 | -0.056859 | 1.466134  |
| H | -2.648709 | -0.313760 | -1.116325 |
| H | -3.190051 | 0.447645  | 0.489835  |

== B3LYP/6-31G(2df,p) harmonic frequencies (cm<sup>-1</sup>) ==

|           |           |           |           |           |           |           |
|-----------|-----------|-----------|-----------|-----------|-----------|-----------|
| 81.4892   | 116.8429  | 264.3153  | 301.4382  | 414.1619  | 453.9160  | 500.9285  |
| 561.1430  | 576.2088  | 698.8890  | 763.8156  | 786.1618  | 868.3925  | 946.9159  |
| 954.5692  | 970.4708  | 982.2823  | 992.3213  | 1045.3252 | 1091.9210 | 1123.5583 |
| 1174.5336 | 1202.4922 | 1223.8402 | 1293.8482 | 1315.6321 | 1357.4858 | 1386.4861 |
| 1432.5650 | 1459.6120 | 1469.2368 | 1640.2393 | 1703.6535 | 2940.1946 | 2966.5219 |
| 3070.9180 | 3140.8689 | 3155.7943 | 3164.0841 | 3180.0523 | 3188.4808 | 3246.8748 |

== Thermochemistry energies (hartree) ==

|         |             |                                 |
|---------|-------------|---------------------------------|
| ZPVE =  | 0.132917    | (after scaling by 0.9854)       |
| G4 Ee = | -272.004991 | (total electronic energy)       |
| G4 U0 = | -271.872074 | (Zero-kelvin internal energy)   |
| G4 UT = | -271.864918 | (Internal energy at 298.15 K)   |
| G4 HT = | -271.863974 | (Enthalpy at 298.15 K)          |
| G4 GT = | -271.903699 | (Gibbs free energy at 298.15 K) |

[ CCSDT-F12a/cc-pVDZ-F12 data ]

CCSD(T)-F12a/cc-pVDZ-F12 Ee = -271.638615 (total electronic energy)

## Species 2: ROO·

[ G4 data ]

== B3LYP/6-31G(2df,p) equilibrium geometry (Angstrom) ==

|   |           |           |           |
|---|-----------|-----------|-----------|
| C | -0.373068 | -1.075658 | 0.425215  |
| C | -1.788718 | -1.352611 | -0.019293 |
| C | -2.638782 | -0.344943 | -0.251944 |
| C | -2.197471 | 1.044028  | -0.117575 |
| C | -0.896182 | 1.347575  | -0.033781 |
| C | 0.154840  | 0.262748  | -0.125454 |
| H | 0.298209  | -1.886771 | 0.129912  |
| H | -0.352934 | -1.051683 | 1.528625  |
| H | -2.116424 | -2.385810 | -0.078705 |
| H | -3.672135 | -0.537186 | -0.522699 |
| H | -2.947129 | 1.829392  | -0.110199 |
| H | -0.567654 | 2.381546  | 0.029915  |
| C | 1.447128  | 0.695177  | 0.561422  |
| H | 0.410200  | 0.131126  | -1.189850 |
| H | 1.338705  | 0.743412  | 1.649313  |
| H | 1.807132  | 1.654492  | 0.178951  |
| O | 2.510374  | -0.278119 | 0.356984  |
| O | 2.934070  | -0.263933 | -0.887835 |

== B3LYP/6-31G(2df,p) harmonic frequencies (cm<sup>-1</sup>) ==

|           |           |           |           |           |           |           |
|-----------|-----------|-----------|-----------|-----------|-----------|-----------|
| 67.4363   | 77.2088   | 131.0957  | 195.6364  | 279.8318  | 329.6978  | 414.1105  |
| 475.0175  | 540.1463  | 562.0659  | 588.7929  | 697.9741  | 782.8079  | 786.6807  |
| 866.3340  | 916.3691  | 947.1464  | 961.2615  | 979.8872  | 990.2338  | 996.0458  |
| 1054.0055 | 1107.6190 | 1121.3879 | 1170.4037 | 1187.2191 | 1206.2427 | 1225.4493 |
| 1265.5150 | 1302.8228 | 1332.1908 | 1371.0449 | 1378.9070 | 1395.4183 | 1439.0649 |
| 1471.2797 | 1476.6684 | 1645.9128 | 1708.7927 | 2957.7980 | 2977.4550 | 3054.0170 |
| 3084.3756 | 3116.4879 | 3154.4153 | 3166.3937 | 3179.5541 | 3191.8386 |           |

== Thermochemistry energies (hartree) ==

|         |             |                                 |
|---------|-------------|---------------------------------|
| ZPVE =  | 0.144410    | (after scaling by 0.9854)       |
| G4 Ee = | -422.350457 | (total electronic energy)       |
| G4 U0 = | -422.206047 | (Zero-kelvin internal energy)   |
| G4 UT = | -422.197564 | (Internal energy at 298.15 K)   |
| G4 HT = | -422.196619 | (Enthalpy at 298.15 K)          |
| G4 GT = | -422.240582 | (Gibbs free energy at 298.15 K) |

[ CCSDT-F12a/cc-pVDZ-F12 data ]

CCSD(T)-F12a/cc-pVDZ-F12 Ee = -421.878349 (total electronic energy)

### Species 3: ·QOOH

[ G4 data ]

== B3LYP/6-31G(2df,p) equilibrium geometry (Angstrom) ==

|   |           |           |           |
|---|-----------|-----------|-----------|
| C | -0.592277 | -1.303972 | 0.111329  |
| C | -2.003481 | -1.102740 | -0.353179 |
| C | -2.588769 | 0.127000  | -0.374506 |
| C | -1.882676 | 1.285493  | 0.032963  |
| C | -0.540881 | 1.170992  | 0.464386  |
| C | 0.105762  | -0.032231 | 0.519831  |
| H | 0.001339  | -1.820327 | -0.664740 |
| H | -0.571479 | -2.024262 | 0.952494  |
| H | -2.556741 | -1.981674 | -0.669136 |
| H | -3.616261 | 0.227439  | -0.711521 |
| H | -2.364043 | 2.255892  | 0.008986  |
| H | -0.004412 | 2.067708  | 0.764153  |
| C | 1.539664  | -0.144078 | 0.940733  |
| H | 1.777691  | 0.523416  | -1.597683 |
| H | 1.686813  | -0.968342 | 1.652498  |
| H | 1.903438  | 0.785800  | 1.391369  |
| O | 2.404079  | -0.515947 | -0.143219 |
| O | 2.535871  | 0.632393  | -1.003751 |

== B3LYP/6-31G(2df,p) harmonic frequencies (cm<sup>-1</sup>) ==

|           |           |           |           |           |           |           |
|-----------|-----------|-----------|-----------|-----------|-----------|-----------|
| 47.7704   | 80.6876   | 147.4125  | 195.9884  | 240.2082  | 291.1770  | 371.7038  |
| 435.9250  | 470.8247  | 534.2353  | 579.9983  | 610.2082  | 685.0947  | 767.6818  |
| 769.7076  | 871.4220  | 917.4901  | 939.9801  | 950.1271  | 975.8362  | 976.3064  |
| 984.6544  | 994.3452  | 1050.1141 | 1132.9834 | 1172.1953 | 1180.5888 | 1191.5203 |
| 1265.0386 | 1307.4395 | 1346.6234 | 1367.3332 | 1395.3605 | 1420.0377 | 1431.3460 |
| 1442.0969 | 1463.7499 | 1545.4940 | 1614.3021 | 2903.9847 | 2936.0460 | 3013.6480 |
| 3074.6464 | 3158.8155 | 3163.6677 | 3182.2702 | 3203.2422 | 3726.5386 |           |

== Thermochemistry energies (hartree) ==

ZPVE = 0.142614 (after scaling by 0.9854)  
G4 Ee = -422.366270 (total electronic energy)  
G4 U0 = -422.223656 (Zero-kelvin internal energy)  
G4 UT = -422.214737 (Internal energy at 298.15 K)  
G4 HT = -422.213793 (Enthalpy at 298.15 K)  
G4 GT = -422.258641 (Gibbs free energy at 298.15 K)

[ CCSDT-F12a/cc-pVDZ-F12 data ]

CCSD(T)-F12a/cc-pVDZ-F12 Ee = -421.895338 (total electronic energy)

Species 4: Transition state along  $\text{ROO} \cdot \xrightarrow{\text{TS1}} \cdot\text{QOOH}$

[ G4 data ]

== B3LYP/6-31G(2df,p) equilibrium geometry (Angstrom) ==

|   |           |           |           |
|---|-----------|-----------|-----------|
| C | 0.374366  | -1.161990 | -0.403217 |
| C | 1.795696  | -1.276168 | 0.064178  |
| C | 2.556341  | -0.185453 | 0.280847  |
| C | 2.009501  | 1.141760  | 0.119205  |
| C | 0.678617  | 1.324150  | -0.121656 |
| C | -0.241760 | 0.216576  | -0.177179 |
| H | -0.260023 | -1.933750 | 0.047491  |
| H | 0.355017  | -1.389847 | -1.486930 |
| H | 2.218066  | -2.272105 | 0.156702  |
| H | 3.596892  | -0.288347 | 0.571394  |
| H | 2.665933  | 1.998858  | 0.225847  |
| H | 0.274953  | 2.330983  | -0.193201 |
| C | -1.607976 | 0.418467  | -0.862702 |
| H | -0.904934 | 0.170194  | 0.929829  |
| H | -1.660185 | 0.045506  | -1.891630 |
| H | -1.891800 | 1.478368  | -0.826157 |
| O | -2.506827 | -0.371913 | -0.090106 |
| O | -2.216001 | -0.003576 | 1.223831  |

== B3LYP/6-31G(2df,p) harmonic frequencies (cm<sup>-1</sup>) ==

|            |           |           |           |           |           |           |
|------------|-----------|-----------|-----------|-----------|-----------|-----------|
| -1945.8504 | 91.7659   | 121.4972  | 217.2424  | 261.7050  | 351.6334  | 387.6258  |
| 426.9457   | 544.8273  | 566.1265  | 615.5524  | 666.8029  | 721.6626  | 788.2452  |
| 812.9284   | 906.0236  | 936.5334  | 950.7698  | 960.5038  | 976.3568  | 985.1185  |
| 994.0398   | 1004.8975 | 1049.0030 | 1127.8696 | 1161.7121 | 1179.2738 | 1198.0808 |
| 1209.1660  | 1242.9510 | 1304.9723 | 1341.9837 | 1352.2431 | 1413.2673 | 1445.6027 |
| 1473.8997  | 1484.2638 | 1519.9171 | 1657.6127 | 1727.2445 | 2913.9295 | 3012.9046 |
| 3054.2034  | 3081.8711 | 3158.6849 | 3168.6036 | 3184.6691 | 3196.3137 |           |

== Thermochemistry energies (hartree) ==

ZPVE = 0.139070 (after scaling by 0.9854)  
 G4 Ee = -422.305519 (total electronic energy)  
 G4 U0 = -422.166449 (Zero-kelvin internal energy)  
 G4 UT = -422.158653 (Internal energy at 298.15 K)  
 G4 HT = -422.157708 (Enthalpy at 298.15 K)  
 G4 GT = -422.199627 (Gibbs free energy at 298.15 K)

[ CCSDT-F12a/cc-pVDZ-F12 data ]

CCSD(T)-F12a/cc-pVDZ-F12 Ee = -421.835537 (total electronic energy)

# Hydrocarbon 16: (cyclohexa-2,4-dien-1-yl)methyl (6-membered path)

Species 1: ·R

[ G4 data ]

== B3LYP/6-31G(2df,p) equilibrium geometry (Angstrom) ==

|   |           |           |           |
|---|-----------|-----------|-----------|
| C | -0.221774 | -1.250254 | -0.162115 |
| C | 1.268477  | -1.145672 | 0.049582  |
| C | 1.873379  | 0.048597  | 0.040476  |
| C | 1.092788  | 1.273692  | -0.134164 |
| C | -0.240273 | 1.265607  | -0.009737 |
| C | -0.986892 | -0.014894 | 0.362643  |
| H | -0.623667 | -2.153053 | 0.308075  |
| H | -0.417508 | -1.359349 | -1.242647 |
| H | 1.842592  | -2.062701 | 0.142282  |
| H | 2.951292  | 0.129319  | 0.142142  |
| H | 1.619848  | 2.199527  | -0.346171 |
| H | -0.821223 | 2.177184  | -0.109398 |
| C | -2.406907 | -0.011735 | -0.102340 |
| H | -0.985362 | -0.056859 | 1.466134  |
| H | -2.648709 | -0.313760 | -1.116325 |
| H | -3.190051 | 0.447645  | 0.489835  |

== B3LYP/6-31G(2df,p) harmonic frequencies (cm<sup>-1</sup>) ==

|           |           |           |           |           |           |           |
|-----------|-----------|-----------|-----------|-----------|-----------|-----------|
| 81.4892   | 116.8429  | 264.3153  | 301.4382  | 414.1619  | 453.9160  | 500.9285  |
| 561.1430  | 576.2088  | 698.8890  | 763.8156  | 786.1618  | 868.3925  | 946.9159  |
| 954.5692  | 970.4708  | 982.2823  | 992.3213  | 1045.3252 | 1091.9210 | 1123.5583 |
| 1174.5336 | 1202.4922 | 1223.8402 | 1293.8482 | 1315.6321 | 1357.4858 | 1386.4861 |
| 1432.5650 | 1459.6120 | 1469.2368 | 1640.2393 | 1703.6535 | 2940.1946 | 2966.5219 |
| 3070.9180 | 3140.8689 | 3155.7943 | 3164.0841 | 3180.0523 | 3188.4808 | 3246.8748 |

== Thermochemistry energies (hartree) ==

|         |             |                                 |
|---------|-------------|---------------------------------|
| ZPVE =  | 0.132917    | (after scaling by 0.9854)       |
| G4 Ee = | -272.004991 | (total electronic energy)       |
| G4 U0 = | -271.872074 | (Zero-kelvin internal energy)   |
| G4 UT = | -271.864918 | (Internal energy at 298.15 K)   |
| G4 HT = | -271.863974 | (Enthalpy at 298.15 K)          |
| G4 GT = | -271.903699 | (Gibbs free energy at 298.15 K) |

[ CCSDT-F12a/cc-pVDZ-F12 data ]

CCSD(T)-F12a/cc-pVDZ-F12 Ee = -271.638615 (total electronic energy)

## Species 2: ROO·

[ G4 data ]

== B3LYP/6-31G(2df,p) equilibrium geometry (Angstrom) ==

|   |           |           |           |
|---|-----------|-----------|-----------|
| C | 0.206741  | 1.026832  | 0.163137  |
| C | 1.640847  | 1.424161  | -0.091752 |
| C | 2.615317  | 0.506028  | -0.077596 |
| C | 2.298187  | -0.904253 | 0.150897  |
| C | 1.037991  | -1.347516 | 0.065478  |
| C | -0.082736 | -0.404312 | -0.325671 |
| H | -0.486371 | 1.729306  | -0.306424 |
| H | 0.010196  | 1.091419  | 1.246117  |
| H | 1.867929  | 2.478268  | -0.217279 |
| H | 3.654500  | 0.790739  | -0.208236 |
| H | 3.109170  | -1.590925 | 0.373974  |
| H | 0.804972  | -2.399686 | 0.205790  |
| C | -1.427531 | -0.936639 | 0.166856  |
| H | -0.132289 | -0.390875 | -1.428291 |
| H | -1.534443 | -0.861249 | 1.251759  |
| H | -1.580332 | -1.971488 | -0.155955 |
| O | -2.535949 | -0.209131 | -0.430712 |
| O | -2.894830 | 0.826467  | 0.297018  |

== B3LYP/6-31G(2df,p) harmonic frequencies (cm<sup>-1</sup>) ==

|           |           |           |           |           |           |           |
|-----------|-----------|-----------|-----------|-----------|-----------|-----------|
| 56.9454   | 90.5071   | 115.6902  | 199.3515  | 279.6498  | 334.6093  | 409.6352  |
| 473.0745  | 535.3500  | 555.1519  | 582.9332  | 698.3417  | 781.7062  | 785.4229  |
| 877.2373  | 911.5971  | 952.7188  | 962.6556  | 979.9109  | 990.4848  | 996.1082  |
| 1050.5711 | 1101.5408 | 1117.9643 | 1176.9698 | 1184.7729 | 1206.4613 | 1227.8498 |
| 1265.9529 | 1307.2621 | 1331.9755 | 1370.5964 | 1377.7819 | 1393.9548 | 1438.0420 |
| 1466.6196 | 1471.7100 | 1645.4829 | 1708.0787 | 2953.7896 | 2978.9355 | 3053.4391 |
| 3091.4710 | 3122.1591 | 3153.9062 | 3166.4357 | 3179.1426 | 3191.7696 |           |

== Thermochemistry energies (hartree) ==

ZPVE = 0.144356 (after scaling by 0.9854)  
G4 Ee = -422.349653 (total electronic energy)  
G4 U0 = -422.205297 (Zero-kelvin internal energy)  
G4 UT = -422.196787 (Internal energy at 298.15 K)  
G4 HT = -422.195842 (Enthalpy at 298.15 K)  
G4 GT = -422.239919 (Gibbs free energy at 298.15 K)

[ CCSDT-F12a/cc-pVDZ-F12 data ]

CCSD(T)-F12a/cc-pVDZ-F12 Ee = -421.877554 (total electronic energy)



### Species 3: ·QOOH

[ G4 data ]

== B3LYP/6-31G(2df,p) equilibrium geometry (Angstrom) ==

|   |           |           |           |
|---|-----------|-----------|-----------|
| C | -0.292506 | 1.045645  | 0.327422  |
| C | -1.540248 | 1.457914  | -0.034945 |
| C | -2.590918 | 0.537881  | -0.265032 |
| C | -2.344301 | -0.846037 | -0.103363 |
| C | -1.115155 | -1.311900 | 0.256206  |
| C | 0.067287  | -0.407539 | 0.478833  |
| H | 3.046317  | 1.153589  | 0.683049  |
| H | 0.498360  | 1.767859  | 0.488183  |
| H | -1.736746 | 2.520330  | -0.147699 |
| H | -3.575140 | 0.889279  | -0.550810 |
| H | -3.157033 | -1.549601 | -0.259832 |
| H | -0.950669 | -2.378635 | 0.381829  |
| C | 1.245242  | -0.846724 | -0.449598 |
| H | 0.465627  | -0.583414 | 1.496402  |
| H | 1.108178  | -0.454335 | -1.463622 |
| H | 1.271640  | -1.941887 | -0.499761 |
| O | 2.538326  | -0.532735 | 0.029799  |
| O | 2.768306  | 0.882905  | -0.202909 |

== B3LYP/6-31G(2df,p) harmonic frequencies (cm<sup>-1</sup>) ==

|           |           |           |           |           |           |           |
|-----------|-----------|-----------|-----------|-----------|-----------|-----------|
| 33.2486   | 80.8888   | 143.7233  | 188.2660  | 234.3127  | 314.4852  | 366.1236  |
| 405.8116  | 477.4889  | 576.4890  | 590.5180  | 619.7169  | 670.7601  | 748.6361  |
| 790.0309  | 846.1647  | 888.5317  | 939.1272  | 963.5336  | 971.8884  | 985.1885  |
| 995.9981  | 1027.5310 | 1049.9152 | 1062.1172 | 1121.3707 | 1171.9471 | 1201.1485 |
| 1228.8578 | 1276.4271 | 1323.1827 | 1347.7570 | 1372.2278 | 1395.1512 | 1403.4599 |
| 1450.4348 | 1461.3010 | 1540.6634 | 1603.3283 | 2902.7124 | 3030.0591 | 3085.3368 |
| 3153.6247 | 3163.9021 | 3173.6687 | 3201.7353 | 3209.2677 | 3769.8459 |           |

== Thermochemistry energies (hartree) ==

ZPVE = 0.142682 (after scaling by 0.9854)  
G4 Ee = -422.359323 (total electronic energy)  
G4 U0 = -422.216641 (Zero-kelvin internal energy)  
G4 UT = -422.207674 (Internal energy at 298.15 K)  
G4 HT = -422.206730 (Enthalpy at 298.15 K)  
G4 GT = -422.251971 (Gibbs free energy at 298.15 K)

[ CCSDT-F12a/cc-pVDZ-F12 data ]

CCSD(T)-F12a/cc-pVDZ-F12 Ee = -421.888321 (total electronic energy)

Species 4: Transition state along  $\text{ROO} \cdot \xrightarrow{\text{TS1}} \cdot\text{QOOH}$

[ G4 data ]

== B3LYP/6-31G(2df,p) equilibrium geometry (Angstrom) ==

|   |           |           |           |
|---|-----------|-----------|-----------|
| C | -0.076380 | -0.870836 | 0.404425  |
| C | -1.349192 | -1.458976 | -0.002584 |
| C | -2.405218 | -0.639401 | -0.245868 |
| C | -2.311243 | 0.800143  | -0.033578 |
| C | -1.115208 | 1.395961  | 0.115715  |
| C | 0.109996  | 0.542274  | -0.114624 |
| H | 1.145336  | -1.304173 | 0.005886  |
| H | 0.184258  | -1.043608 | 1.457754  |
| H | -1.487287 | -2.535928 | 0.022375  |
| H | -3.376404 | -1.063148 | -0.482794 |
| H | -3.231126 | 1.373121  | 0.024847  |
| H | -1.015225 | 2.465441  | 0.272985  |
| C | 1.494603  | 1.065024  | 0.254113  |
| H | 0.156360  | 0.436191  | -1.217504 |
| H | 1.697650  | 1.011690  | 1.331655  |
| H | 1.669183  | 2.082299  | -0.109663 |
| O | 2.426651  | 0.252897  | -0.468447 |
| O | 2.344988  | -1.056274 | 0.022055  |

== B3LYP/6-31G(2df,p) harmonic frequencies (cm<sup>-1</sup>) ==

|            |           |           |           |           |           |           |
|------------|-----------|-----------|-----------|-----------|-----------|-----------|
| -1983.3502 | 127.4770  | 154.9539  | 268.0826  | 337.5470  | 379.3726  | 414.7620  |
| 425.7750   | 459.1096  | 566.8117  | 589.3298  | 619.2654  | 699.3834  | 774.4366  |
| 817.2972   | 902.8914  | 919.4433  | 952.6876  | 973.5887  | 980.0878  | 994.4194  |
| 1010.9672  | 1040.8016 | 1066.6189 | 1109.0186 | 1149.7503 | 1183.4176 | 1198.9237 |
| 1238.7318  | 1256.0162 | 1285.3999 | 1302.4661 | 1354.6410 | 1374.3631 | 1400.5993 |
| 1436.5201  | 1476.3237 | 1530.7054 | 1574.6996 | 1654.6619 | 2896.3514 | 3020.7440 |
| 3023.8798  | 3097.9766 | 3161.8151 | 3168.8210 | 3181.6788 | 3192.8933 |           |

== Thermochemistry energies (hartree) ==

ZPVE = 0.138613 (after scaling by 0.9854)  
G4 Ee = -422.297622 (total electronic energy)  
G4 U0 = -422.159009 (Zero-kelvin internal energy)  
G4 UT = -422.151449 (Internal energy at 298.15 K)  
G4 HT = -422.150505 (Enthalpy at 298.15 K)  
G4 GT = -422.191566 (Gibbs free energy at 298.15 K)

[ CCSDT-F12a/cc-pVDZ-F12 data ]

CCSD(T)-F12a/cc-pVDZ-F12 Ee = -421.827476 (total electronic energy)

## References

- (1) Martin, J. M.; de Oliveira, G. Towards standard methods for benchmark quality ab initio thermochemistry—W1 and W2 theory. *J. Chem. Phys.* **1999**, *111*, 1843–1856.
- (2) Curtiss, L. A.; Redfern, P. C.; Raghavachari, K. Gaussian-4 theory. *J. Chem. Phys.* **2007**, *126*, 084108.
